# Supplementary material for: Hepatic transcriptome perturbations in dairy cows fed different forage resources
Source: BMC Genomics. 2021 Jan 7;22:35. doi: 10.1186/s12864-020-07332-0 (PMC7792104; doi:10.1186/s12864-020-07332-0)
Supplement: Supplementary file 1 — Additional file 1. Dataset of differently expressed genes (DEG) of CS vs. MF. [file 12864_2020_7332_MOESM1_ESM.xlsx]

## Sheet: CS_VS_MF_L_id&name
ENTREZID	SYMBOL	GENENAME	basemean	log2	expres ratio	lfcse	stat	pvalue	padj	MF1	MF2	MF3	MF4	MF5	CS1	CS2	CS3	CS4	CS5
526045	SURF4	surfeit 4	27756.5	-1.05889	0.480001	0.190843	-5.54849	2.88e-08	9.82e-05	44700.1	41480.8	34834.2	40955.8	25575	21003	18096.6	14183.7	21114.8	15621.1
617307	SLC19A1	solute carrier family 19 member 1	364.283	-1.35235	0.391653	0.253506	-5.3346	9.58e-08	0.000163164	740.148	714.467	426.149	410.693	327.766	237.789	207.804	216.71	149.162	212.143
537578	SPTBN4	spectrin beta, non-erythrocytic 4	536.656	-1.31931	0.400728	0.261419	-5.04671	4.49e-07	0.000510614	947.56	1024.64	667.245	818.583	374.921	406.9	273.462	252.972	274.493	325.791
338068	ACVR1	activin A receptor type 1	2888.06	-1.02975	0.489794	0.213215	-4.82964	1.37e-06	0.000932292	4011.86	4797.58	3735.94	4388.67	2453.61	2396.35	1894.61	1332.2	2037.07	1832.68
100859923	CAMTA2	calmodulin binding transcription activator 2	17624	-1.39907	0.379174	0.289541	-4.83203	1.35e-06	0.000932292	27901.2	41959.1	22066.7	24306.6	11554.5	13682.5	7988.62	9032.73	9613.43	8134.68
504625	SORBS1	sorbin and SH3 domain containing 1	472.458	-1.32711	0.398565	0.286587	-4.63074	3.64e-06	0.00206955	894.997	890.384	454.699	542.452	596.781	472.624	230.141	218.436	232.127	191.939
529230	CEP170	centrosomal protein 170	188.369	-0.784572	0.580524	0.172507	-4.54805	5.41e-06	0.00225833	261.396	253.073	231.579	182.219	262.831	131.449	129.285	151.956	118.27	161.633
407210	GRB10	growth factor receptor bound protein 10	1314.66	-1.2046	0.433891	0.266053	-4.52766	5.96e-06	0.00225833	2490.36	2050.81	1681.33	1899.28	1048.23	1044.2	772.328	498.173	622.243	1039.67
617277	TCEB2	transcription elongation factor B subunit 2(TCEB2)	2537.8	-1.49677	0.354345	0.328508	-4.55627	5.21e-06	0.00225833	5845.89	4596.97	3160.69	3574.29	1561.53	2180.72	1000.44	891.876	1141.22	1424.39
782848	KIAA1429	KIAA1429 ortholog(KIAA1429)	2835.64	-0.805245	0.572265	0.178886	-4.50144	6.75e-06	0.0023002	3793.08	4240.51	3503.3	4134.97	2365.48	1771.6	1979.89	2245.66	2294.8	2027.15
528379	LIN7A	lin-7 homolog A, crumbs cell polarity complex component	1002.03	-1.16835	0.444931	0.263387	-4.43585	9.17e-06	0.00246803	1754.48	1941.25	1228.75	1142.37	869.662	748.813	704.639	345.354	627.538	657.475
787681	PPIE	peptidylprolyl isomerase E	842.281	-1.11043	0.463157	0.250491	-4.43301	9.29e-06	0.00246803	1321.19	1606.39	997.166	1163.4	670.219	715.582	475.851	360.031	548.103	564.873
280936	SV2A	synaptic vesicle glycoprotein 2A	2623.2	-0.971332	0.510035	0.219252	-4.4302	9.41e-06	0.00246803	3642.5	4896.34	3621.73	3166.4	2046.99	2107.61	1917.62	1510.92	1766.99	1554.87
539591	ARMC8	armadillo repeat containing 8	55.4701	-1.65875	0.316713	0.382942	-4.3316	1.48e-05	0.00312881	160.531	91.0445	50.7571	72.8876	47.155	22.1542	44.6745	21.5846	21.1827	22.7296
521540	CCT6A	chaperonin containing TCP1 subunit 6A	7411.74	-1.07816	0.473634	0.249086	-4.32846	1.5e-05	0.00312881	14173.6	11809.5	8427.8	10415.9	5470.75	6566.52	4660.37	4008.69	4571.94	4012.2
508076	COL18A1	collagen type XVIII alpha 1 chain	121.097	-1.01965	0.493237	0.236033	-4.31994	1.56e-05	0.00312881	184.682	242.271	141.697	116.34	127.55	79.0168	94.0873	77.7046	79.4352	68.1889
617443	LOC617443	uncharacterized LOC617443(LOC617443)	606.113	-1.07771	0.473779	0.247342	-4.35718	1.32e-05	0.00312881	907.783	1194.38	787.793	787.746	436.764	469.67	381.764	299.594	439.542	356.097
281127	DSC1	desmocollin 1	134535	-1.00285	0.499012	0.23762	-4.22041	2.44e-05	0.00409723	191214	264853	169842	171915	99670.2	98358.9	93599.9	107302	78922.4	69673.9
511554	FAM210A	family with sequence similarity 210 member A	347.855	-1.22815	0.426866	0.293726	-4.18127	2.9e-05	0.00409723	569.673	706.752	462.101	490.589	210.265	282.097	185.467	143.322	195.94	232.347
506692	NAALADL1	N-acetylated alpha-linked acidic dipeptidase like 1	566.104	-1.43177	0.370676	0.338175	-4.23381	2.3e-05	0.00409723	929.092	1273.08	963.328	665.8	299.937	481.486	271.432	203.759	251.545	321.582
504334	RGL2	ral guanine nucleotide dissociation stimulator like 2	391.161	-0.942924	0.520178	0.22623	-4.16798	3.07e-05	0.00409723	596.665	645.027	511.801	483.581	337.815	299.082	272.108	204.622	205.649	355.256
517533	S1PR5	sphingosine-1-phosphate receptor 5	59.0816	-0.936669	0.522438	0.224939	-4.1641	3.13e-05	0.00409723	92.341	78.6994	74.0208	86.9044	57.2044	38.4007	39.2594	37.1255	39.7176	47.1429
537922	TNFRSF21	TNF receptor superfamily member 21	983.634	-0.702476	0.614516	0.166154	-4.22787	2.36e-05	0.00409723	1512.97	1408.87	1037.35	1135.36	999.531	655.766	703.962	733.877	881.731	766.914
515573	UBE2I	ubiquitin conjugating enzyme E2 I	1015.82	-1.13565	0.455129	0.270287	-4.20166	2.65e-05	0.00409723	1659.3	2097.11	1255.18	1335.8	635.433	784.999	636.95	516.304	574.581	662.526
100141289	USP13	ubiquitin specific peptidase 13	159.062	-1.08641	0.470931	0.259459	-4.18722	2.82e-05	0.00409723	214.515	339.488	177.65	221.466	129.87	122.587	92.7335	95.8357	116.505	79.9746
282121	VEGFB	vascular endothelial growth factor B	6742.84	-1.12099	0.459779	0.268631	-4.17296	3.01e-05	0.00409723	11308.2	11147.5	8743.98	10418.7	4574.03	6678.77	3659.93	3637.44	3601.95	3657.79
509530	BOLA1	bolA family member 1	422.747	-1.28782	0.40957	0.311388	-4.13574	3.54e-05	0.00428953	673.379	810.141	670.417	548.058	298.391	377.361	268.047	151.956	281.554	148.163
538745	GJC2	gap junction protein gamma 2	374.068	-1.32243	0.399861	0.320918	-4.12078	3.78e-05	0.00428953	664.855	765.391	540.352	476.573	226.499	346.345	222.019	142.458	165.931	190.255
613305	MIF4GD	MIF4G domain containing	169.285	-1.06569	0.477745	0.258039	-4.12996	3.63e-05	0.00428953	295.491	285.478	206.201	235.483	124.458	143.264	86.6415	97.5625	96.2049	122.066
509913	WDR46	WD repeat domain 46	179.538	-0.977302	0.507929	0.23705	-4.12277	3.74e-05	0.00428953	269.92	274.676	242.154	257.91	147.649	158.034	119.132	141.595	90.0266	94.2858
512289	MALL	mal, T cell differentiation protein like	238.677	-1.20065	0.435078	0.294473	-4.0773	4.56e-05	0.00500889	375.046	402.756	396.54	309.772	180.117	246.651	116.425	139.005	125.331	95.1277
788407	ANKRD65	ankyrin repeat domain 65	220.985	-0.889491	0.539805	0.220132	-4.04072	5.33e-05	0.00518876	377.888	356.462	263.303	264.918	174.705	177.972	151.623	150.229	141.218	151.531
781073	JPH4	junctophilin 4	1460.8	-1.12973	0.457002	0.279456	-4.04259	5.29e-05	0.00518876	2415.07	2484.43	1851.58	2148.78	1127.85	1527.9	811.587	882.379	577.229	781.226
281421	PPT1	palmitoyl-protein thioesterase 1	226.165	-0.945764	0.519154	0.233765	-4.04579	5.21e-05	0.00518876	326.745	428.989	253.786	309.772	171.613	163.941	159.745	132.961	165.931	148.163
616003	TM6SF1	transmembrane 6 superfamily member 1	81.7577	-1.29871	0.406491	0.321074	-4.04488	5.24e-05	0.00518876	133.539	158.942	142.754	85.5027	61.0696	64.2473	27.0755	45.7594	40.6002	58.0868
618505	AP5S1	adaptor related protein complex 5 subunit sigma 1	310.55	-1.04506	0.484624	0.261531	-3.99594	6.44e-05	0.0055108	447.499	591.017	437.78	402.283	214.903	278.405	196.974	176.13	204.766	155.74
618485	CCDC106	coiled-coil domain containing 106	223.442	-1.39127	0.38123	0.348906	-3.98751	6.68e-05	0.0055108	345.213	521.577	340.496	320.986	90.4448	145.48	105.594	136.415	92.6744	135.536
767938	GBAS	glioblastoma amplified sequence(GBAS)	9318.43	-1.27443	0.413388	0.319788	-3.98523	6.74e-05	0.0055108	18498	14462.2	12794	15853	4323.57	7830.05	3940.83	5586.96	5262.14	4633.48
523474	NOL9	nucleolar protein 9	874.493	-0.788603	0.578904	0.196547	-4.01228	6.01e-05	0.0055108	1260.1	1402.7	1020.43	1037.25	820.188	799.768	597.691	470.545	698.147	638.113
282337	RASSF2	Ras association domain family member 2	596.632	-0.739038	0.599139	0.184918	-3.99656	6.43e-05	0.0055108	806.918	888.841	648.211	825.592	563.541	448.993	437.946	347.081	436.011	563.19
281477	SCG2	secretogranin II	485.225	-0.895102	0.537709	0.224052	-3.99507	6.47e-05	0.0055108	794.132	762.304	622.832	641.971	336.269	348.56	349.274	353.988	359.224	283.699
508541	STAT3	signal transducer and activator of transcription 3	631.798	-0.814603	0.568565	0.204783	-3.97788	6.95e-05	0.0055108	970.29	1035.44	782.506	761.114	480.826	501.424	444.038	417.878	476.611	447.858
538853	ZSCAN10	zinc finger and SCAN domain containing 10	423.475	-1.08258	0.472184	0.271951	-3.98079	6.87e-05	0.0055108	636.442	776.193	622.832	556.469	286.022	394.346	226.08	195.988	253.31	287.067
615464	TMEM204	transmembrane protein 204	358.685	-1.14133	0.453342	0.28734	-3.97205	7.13e-05	0.00551922	619.395	695.95	494.882	399.48	259.739	318.283	209.835	134.688	218.888	235.715
280678	C4A	complement component 4A	1557.84	-0.941661	0.520633	0.238069	-3.95541	7.64e-05	0.00562466	2275.85	2788.43	1770.16	2360.44	1052.1	1231.78	1074.22	878.062	1036.19	1111.23
507640	DDX31	DEAD-box helicase 31	795.223	-1.04375	0.485066	0.263609	-3.95945	7.51e-05	0.00562466	1396.48	1396.53	999.281	974.17	589.824	743.644	407.486	379.889	564.873	500.052
515112	UBXN11	UBX domain protein 11	556.914	-0.629231	0.646521	0.159227	-3.95179	7.76e-05	0.00562466	784.188	779.279	698.968	587.306	534.166	386.961	437.269	453.277	496.911	410.817
282689	ANXA2	annexin A2	60.4597	1.32707	2.50893	0.339499	3.9089	9.27e-05	0.00607646	32.6745	23.1469	35.953	37.8455	41.7438	65.7243	114.394	64.7538	141.218	47.1429
615866	CBLC	Cbl proto-oncogene C	223.285	-1.29503	0.407527	0.331095	-3.91136	9.18e-05	0.00607646	461.705	458.309	232.637	288.747	146.103	155.08	104.241	82.8849	111.209	191.939
507864	KNSTRN	kinetochore localized astrin (SPAG5) binding protein	2547.01	-1.11756	0.460873	0.285682	-3.9119	9.16e-05	0.00607646	4180.91	4874.74	3159.63	3480.38	1740.87	2465.03	1491.86	999.799	1548.1	1528.78
532842	MRPL32	mitochondrial ribosomal protein L32	135.413	-1.21525	0.430699	0.310136	-3.91844	8.91e-05	0.00607646	210.253	248.443	204.086	207.449	77.3033	114.464	63.6274	72.5243	96.2049	59.7705
504503	SLC29A3	solute carrier family 29 member 3	130.202	-1.23163	0.425837	0.314545	-3.91558	9.02e-05	0.00607646	217.356	242.271	171.305	201.842	81.9415	116.679	87.3184	66.4806	68.8439	47.9848
526949	OXSR1	oxidative stress responsive 1	4663.37	-0.870529	0.546946	0.223433	-3.89616	9.77e-05	0.00616785	6884.37	7726.43	5391.89	6401.49	3743.02	3367.45	2761.7	2408.84	3950.58	3997.89
510075	TARS	threonyl-tRNA synthetase	249.636	-4.1402	0.0567122	1.06169	-3.89963	9.63e-05	0.00616785	1405	30.8625	37.0104	25.2303	864.251	19.2003	27.0755	35.3988	21.1827	31.148
509241	DPYS	dihydropyrimidinase	1747.89	-1.52848	0.346641	0.393228	-3.88702	0.000101481	0.00628815	3535.95	3723.56	2373.95	2569.29	777.671	1443.72	559.108	455.867	746.691	1293.06
618020	FAM195A	MAPK regulated corepressor interacting protein 2(FAM195A)	243.198	-1.22729	0.427118	0.31773	-3.86269	0.000112147	0.0065896	431.872	516.947	265.418	304.165	187.074	208.25	134.7	72.5243	135.922	175.102
537087	GBA	glucosylceramidase beta	1953.36	-0.833984	0.560978	0.21564	-3.86748	0.000109965	0.0065896	3054.36	3157.24	2138.14	2765.52	1400.74	1405.32	1362.57	1506.61	1485.44	1257.71
519558	MINK1	misshapen like kinase 1	6991.67	-0.85432	0.553126	0.221086	-3.8642	0.000111454	0.0065896	10248.4	12374.3	7612.51	9280.55	5503.22	5571.05	5021.15	3706.51	5689.33	4909.6
NA	ADRBK1	NA	1124.41	-1.09376	0.468539	0.28404	-3.85072	0.00011777	0.00680272	1802.78	1899.59	1516.37	1773.13	666.354	1092.2	607.844	601.779	569.286	714.72
517994	CCDC151	coiled-coil domain containing 151	620.505	-1.06304	0.478623	0.276472	-3.84502	0.000120542	0.00680505	943.299	1168.15	881.905	835.404	369.51	539.825	425.085	373.846	374.228	293.801
281174	FUT1	fucosyltransferase 1	1320.53	-1.00529	0.498172	0.261625	-3.84247	0.000121804	0.00680505	1974.68	2485.98	1591.45	1836.21	927.639	1206.67	715.469	626.817	894.97	945.384
511110	STMN3	stathmin 3	268.783	-1.16025	0.447434	0.302388	-3.83696	0.000124565	0.00684706	536.998	499.973	344.726	323.789	153.06	226.712	167.191	132.961	150.044	152.373
516258	TRMT10B	tRNA methyltransferase 10B	1591.73	-0.715587	0.608957	0.186773	-3.83132	0.000127458	0.00689487	2406.55	2231.36	2053.55	1844.62	1358.99	1388.33	1176.43	973.034	1096.21	1388.19
507830	GPR108	G protein-coupled receptor 108	130.118	-1.62579	0.324033	0.425685	-3.81922	0.000133872	0.00712867	230.142	297.823	214.66	197.637	43.2898	113.725	46.0283	47.4862	38.835	71.5562
404191	ANPEP	alanyl aminopeptidase, membrane	1469.35	-0.986852	0.504578	0.259506	-3.8028	0.000143068	0.00717021	2308.52	2419.62	1995.39	2050.66	993.347	1473.26	821.064	801.221	825.244	1005.15
505809	FPGS	folylpolyglutamate synthase	980.229	-1.03209	0.489	0.271228	-3.80526	0.000141653	0.00717021	1625.2	1765.34	1091.28	1394.68	708.098	742.167	525.264	429.102	618.712	902.45
510539	GGA3	golgi associated, gamma adaptin ear containing, ARF binding protein 3	353.119	-0.830478	0.562343	0.218148	-3.80695	0.00014069	0.00717021	511.427	575.586	475.848	438.727	260.512	304.252	224.726	222.753	247.132	270.23
504335	TAPBP	TAP binding protein	121.33	-0.884635	0.541625	0.232036	-3.81249	0.000137571	0.00717021	204.571	208.322	113.146	119.143	143.011	76.8014	90.0259	72.5243	84.7309	101.021
615171	CDK10	cyclin dependent kinase 10	240.353	-0.904591	0.534184	0.238654	-3.79039	0.000150413	0.00732294	377.888	424.36	304.543	263.517	197.896	197.173	141.469	143.322	141.218	212.143
540329	PPM1K	protein phosphatase, Mg2+/Mn2+ dependent 1K	644.111	-1.07712	0.473975	0.283921	-3.79372	0.000148404	0.00732294	948.981	1128.03	831.148	999.401	463.82	669.058	340.474	259.015	413.946	387.245
534624	CLIP1	CAP-Gly domain containing linker protein 1	1153.28	-1.11874	0.460496	0.296339	-3.7752	0.000159882	0.00756774	2094.01	2306.97	1223.46	1635.77	637.752	886.908	556.401	763.232	648.721	779.542
777770	KIF3C	kinesin family member 3C	60.3467	1.36595	2.57746	0.361506	3.7785	0.000157776	0.00756774	28.4126	15.4313	38.0679	46.2556	39.4247	35.4468	95.441	124.327	83.8483	96.8114
514870	WDR3	WD repeat domain 3	9066.52	-1.28802	0.409513	0.342151	-3.76448	0.000166898	0.0077916	19385.9	15170.5	11130.6	12410.5	6227.55	10492.3	4268.45	3411.23	4188	3980.21
100297143	ANKRD34C	ankyrin repeat domain 34C	3209.84	-1.04381	0.485044	0.278347	-3.75005	0.000176803	0.00801351	5085.86	5342.3	4372.52	4732.08	2083.32	3405.11	1844.52	1612.8	1784.64	1835.21
282652	HSD17B14	hydroxysteroid 17-beta dehydrogenase 14	156.923	-1.15068	0.450414	0.307063	-3.74736	0.000178705	0.00801351	265.658	314.798	160.731	235.483	106.679	128.495	79.1957	70.7975	79.4352	127.959
281489	SLAMF1	signaling lymphocytic activation molecule family member 1	12820.4	-1.12083	0.459829	0.298613	-3.75345	0.000174419	0.00801351	21163.1	24987.8	16069.9	17500	8102.16	13155.2	6374.92	5857.2	6871.15	8122.89
614275	MOB3C	MOB kinase activator 3C	2977.16	-0.730637	0.602638	0.195529	-3.73673	0.000186431	0.00824289	4685.24	4836.16	2927	3478.98	2651.5	1970.99	2283.82	2193.86	2556.93	2187.09
541215	TTBK2	tau tubulin kinase 2	392.041	-0.68141	0.623556	0.182501	-3.73374	0.000188658	0.00824289	531.316	635.768	397.598	458.351	394.247	319.021	337.766	252.108	325.684	268.546
521401	AMDHD2	amidohydrolase domain containing 2	262.083	-0.938049	0.521938	0.252345	-3.71733	0.000201341	0.00857712	431.872	449.05	345.783	298.559	198.669	242.22	193.59	173.54	156.223	131.327
788123	WSCD1	WSC domain containing 1	184.908	-0.694426	0.617955	0.186699	-3.71951	0.000199613	0.00857712	264.237	245.357	227.35	255.106	153.06	134.402	152.976	128.644	146.514	141.429
533611	BBS2	Bardet-Biedl syndrome 2	289.688	-1.36592	0.387988	0.368599	-3.7057	0.000210808	0.00867734	795.553	496.887	359.53	315.379	120.593	190.527	121.84	164.043	164.166	168.368
282648	CACNA1A	calcium voltage-gated channel subunit alpha1 A	605.52	-0.714402	0.609458	0.192817	-3.70507	0.000211332	0.00867734	812.601	932.048	776.161	780.738	463.047	435.7	491.42	418.742	514.564	430.179
513577	PRPF31	pre-mRNA processing factor 31	74.4465	-1.31371	0.402284	0.354489	-3.70594	0.000210611	0.00867734	129.277	155.856	129.008	72.8876	44.8359	67.2012	39.9363	35.3988	40.6002	29.4643
523793	CELSR3	cadherin EGF LAG seven-pass G-type receptor 3	1528.31	-0.756862	0.591782	0.204927	-3.69333	0.000221337	0.00897997	2126.68	2490.61	1750.06	2024.03	1212.12	1008.76	1202.15	922.095	1184.47	1362.09
505787	ABCA3	ATP binding cassette subfamily A member 3	2016.39	-0.899266	0.536159	0.243758	-3.68918	0.000224977	0.00902025	3064.3	3617.09	2475.47	2630.96	1340.44	1810	1301.65	1150.89	1386.59	1386.51
613381	HN1	hematological and neurological expressed 1(HN1)	147.347	-1.11023	0.463221	0.302291	-3.67271	0.000239993	0.00911043	223.039	233.012	227.35	214.458	110.544	150.649	107.625	69.0708	83.8483	53.8776
527539	LRRC48	NA	2780.48	-0.881384	0.542846	0.239796	-3.67556	0.000237328	0.00911043	4460.78	4220.45	3573.09	3937.33	1832.09	2449.52	1858.05	1441.85	2007.06	2024.62
507270	RPL29	ribosomal protein L29	400.345	-1.16027	0.44743	0.31525	-3.68047	0.000232806	0.00911043	757.196	780.822	517.088	494.794	217.222	321.975	186.144	184.764	228.597	314.847
505721	RTEL1	regulator of telomere elongation helicase 1	1676.11	-1.21614	0.430434	0.330847	-3.67582	0.000237083	0.00911043	2784.44	3041.5	2568.52	2473.97	850.336	1742.06	861	971.308	760.813	707.144
534170	ZNF274	zinc finger protein 274	2648.15	-1.43689	0.369362	0.391303	-3.67207	0.000240592	0.00911043	4851.45	4956.52	3988.67	4147.58	1395.32	3045.47	1017.36	685.527	1043.25	1350.31
517206	CDK2AP2	cyclin dependent kinase 2 associated protein 2	1383.09	-0.684552	0.622199	0.1869	-3.66266	0.000249613	0.00934816	1890.86	2350.18	1293.25	1656.79	1337.35	960.017	1095.88	1003.25	1199.47	1043.88
100139105	RAB3D	RAB3D, member RAS oncogene family	180.391	-1.11584	0.461423	0.305969	-3.6469	0.000265428	0.00983237	271.34	376.523	265.418	220.064	102.04	139.572	83.934	102.743	142.101	100.179
508353	AIDA	axin interactor, dorsalization associated	192.636	-1.14217	0.453078	0.314472	-3.63202	0.000281208	0.0099829	285.547	473.74	229.465	228.474	109.771	132.187	99.5023	107.923	137.688	122.066
104797348	MIR4449	microRNA 4449	492.319	-1.29111	0.408637	0.355103	-3.63587	0.000277046	0.0099829	836.751	1378.01	557.271	445.735	278.292	265.851	278.2	196.852	367.167	319.057
616315	TOM1L2	target of myb1 like 2 membrane trafficking protein	142.194	-0.827316	0.563577	0.227623	-3.6346	0.000278415	0.0099829	194.626	236.098	186.11	179.416	115.182	126.279	106.271	80.2948	87.3787	110.281
507869	TPR	translocated promoter region, nuclear basket protein	521.835	-0.982022	0.50627	0.269886	-3.63866	0.000274058	0.0099829	814.021	1038.52	558.329	691.03	364.098	380.315	302.568	244.338	421.889	403.24
514514	SLC26A6	solute carrier family 26 member 6	724.485	-1.06506	0.477953	0.293813	-3.62496	0.000289011	0.0101541	1143.61	1413.5	850.182	1024.63	471.55	600.38	415.608	281.463	420.124	623.802
767936	P2RY14	purinergic receptor P2Y14	153.486	-0.644989	0.639498	0.178325	-3.61694	0.000298112	0.0102108	238.666	183.632	144.869	206.048	164.656	121.11	119.809	113.967	120.035	122.066
505640	PLTP	phospholipid transfer protein	79.9197	-1.48783	0.356549	0.41136	-3.61685	0.000298207	0.0102108	169.055	199.063	91.9973	65.8791	64.1617	76.0629	41.2901	30.2185	18.5349	42.9337
767873	SNRPB2	small nuclear ribonucleoprotein polypeptide B2	2921.12	-0.792064	0.577517	0.219066	-3.61563	0.000299614	0.0102108	4239.16	5049.11	3268.55	3839.21	2123.52	2391.18	2057.74	2170.55	2319.51	1752.71
789755	CD300LB	CD300 molecule-like family member b	362.417	-0.824882	0.564528	0.228332	-3.61265	0.000303083	0.0102268	478.752	611.078	500.169	473.769	254.328	279.882	240.972	272.83	303.619	208.776
404146	S100A13	S100 calcium binding protein A13	614.051	-0.827247	0.563604	0.229635	-3.60244	0.000315239	0.0105327	842.434	956.738	872.388	849.42	408.161	499.209	477.882	342.764	473.963	417.552
100126041	COPA	coatomer protein complex subunit alpha	54.0403	-0.894582	0.537903	0.249269	-3.58882	0.000332184	0.0106918	79.5553	78.6994	82.4804	64.4775	47.155	46.5239	33.8443	38.8523	31.7741	37.0409
533048	NPR1	natriuretic peptide receptor 1	993.353	-0.989197	0.503758	0.275731	-3.58754	0.000333809	0.0106918	1420.63	1827.06	1276.33	1494.2	589.051	909.063	473.144	685.527	637.247	621.276
534704	TPD52L2	tumor protein D52 like 2	828.956	-1.16043	0.447378	0.323594	-3.58608	0.000335688	0.0106918	1179.12	1584.79	1430.72	1072.29	461.501	866.231	402.748	352.261	428.068	511.837
504482	WASF2	WAS protein family member 2	102.426	-0.856018	0.552475	0.238103	-3.59516	0.000324196	0.0106918	125.015	175.916	155.444	126.152	78.8493	76.8014	82.5802	61.3003	71.4917	70.7144
505059	WTIP	WT1 interacting protein	1919.5	-1.40838	0.376734	0.392199	-3.591	0.000329417	0.0106918	3764.67	3683.44	3056	2506.21	933.051	2018.25	764.205	527.528	682.26	1259.39
513004	TPST1	tyrosylprotein sulfotransferase 1	365.08	-0.86991	0.547181	0.243236	-3.5764	0.000348355	0.0109925	538.419	611.078	459.987	507.41	244.278	262.897	205.774	231.387	261.254	328.317
534251	DEDD2	death effector domain containing 2	593.752	-1.34047	0.394892	0.375374	-3.57102	0.00035559	0.0110738	1130.82	1137.28	776.161	863.437	350.184	688.259	326.259	217.573	266.549	180.995
618232	MED15	mediator complex subunit 15	265.853	-0.711722	0.610591	0.19938	-3.56967	0.00035743	0.0110738	352.316	396.583	366.932	249.5	286.022	209.727	196.974	145.049	200.353	255.077
537773	GFI1B	growth factor independent 1B transcriptional repressor	415.322	-0.913745	0.530805	0.256216	-3.56631	0.000362047	0.0111158	539.84	751.503	632.349	493.393	297.618	407.638	280.231	266.786	269.197	214.669
512029	SNX1	sorting nexin 1	601.88	-1.02116	0.49272	0.2871	-3.55681	0.000375387	0.011365	1017.17	1075.56	733.864	793.353	413.573	481.486	352.658	233.977	354.811	562.348
281500	SPP2	secreted phosphoprotein 2	89.9295	-1.30867	0.403692	0.36804	-3.5558	0.000376834	0.011365	159.111	189.805	108.916	135.963	47.928	62.0319	48.059	25.9015	44.1307	77.4491
514313	PACS1	phosphofurin acidic cluster sorting protein 1	7707.56	-0.681138	0.623673	0.192122	-3.54535	0.000392094	0.0117215	11259.9	12840.4	8008	8516.63	6847.52	6316.91	5733.91	4913.52	6166.82	6472.05
513605	GTPBP2	GTP binding protein 2	1798.18	-0.899481	0.536079	0.254249	-3.53779	0.000403489	0.0118542	2768.81	3277.6	1940.4	2509.01	1212.12	1340.33	976.748	1040.38	1353.93	1562.45
506911	RAB19	RAB19, member RAS oncogene family	54.4927	0.948016	1.92922	0.267828	3.53964	0.000400668	0.0118542	24.1507	29.3194	37.0104	40.6488	52.5662	57.601	69.0424	92.3822	71.4917	70.7144
407129	CANX	calnexin	653.568	-1.00108	0.499627	0.283967	-3.52532	0.000422964	0.0121131	1109.51	1117.22	940.065	763.918	429.033	663.15	425.085	395.43	406.885	285.383
281342	MYOC	myocilin	41.4667	0.963118	1.94952	0.273104	3.52656	0.000420998	0.0121131	21.3095	20.0606	31.7232	39.2471	27.8292	54.6471	60.2429	40.5791	61.7829	57.245
506889	PCBP4	poly(rC) binding protein 4	93.8074	-0.931966	0.524144	0.264276	-3.52648	0.000421115	0.0121131	122.174	163.571	146.984	96.7162	86.5797	69.4166	52.1203	91.5188	45.0133	63.9797
537675	UTP11L	NA	1210.66	-0.770013	0.586412	0.218722	-3.52051	0.000430712	0.0122322	1846.82	1915.02	1241.44	1778.74	851.882	958.54	858.969	896.193	882.614	876.353
508592	CCDC153	coiled-coil domain containing 153	40200.3	-0.858934	0.55136	0.244555	-3.51223	0.000444357	0.0124128	49722.1	77421.7	49431.1	51492.3	31063.5	25087.5	26726.2	20329.3	33717.6	37011.4
616487	STAG2	stromal antigen 2	704.387	-0.966231	0.511842	0.274937	-3.51437	0.000440802	0.0124128	1181.96	1070.93	913.629	999.401	494.741	756.937	383.118	474.862	321.271	447.016
515669	PLCB3	phospholipase C beta 3	5629.58	-0.838975	0.559041	0.239324	-3.5056	0.000455581	0.0126229	10420.3	6641.62	6026.35	8529.25	4493.64	5670.01	3888.71	3372.38	3576.35	3677.15
767899	B3GNT5	UDP-GlcNAc:betaGal beta-1,3-N-acetylglucosaminyltransferase 5	802.881	-1.08033	0.472921	0.308448	-3.50247	0.000460964	0.0126691	1332.55	1348.69	1028.89	1262.92	479.28	755.46	435.238	303.048	421.889	660.843
618127	FXR2	FMR1 autosomal homolog 2	654.157	-0.961308	0.513591	0.275616	-3.48786	0.000486911	0.0132751	1068.31	1171.23	742.323	961.555	380.332	563.456	424.408	492.993	390.115	346.837
530795	KLK9	kallikrein related peptidase 9	30.5013	-1.40527	0.377547	0.403204	-3.48526	0.000491651	0.013298	63.9284	52.4663	39.1253	42.0505	24.737	25.8466	18.9528	21.5846	7.06091	9.26022
767841	ARMCX2	armadillo repeat containing X-linked 2	708.342	-0.826112	0.564047	0.237319	-3.48102	0.000499515	0.0134043	1066.89	1209.81	829.033	888.668	536.485	598.903	490.743	346.217	500.442	616.225
525599	LOC525599	butyrophilin family member	2537.03	-0.932268	0.524034	0.268009	-3.4785	0.000504233	0.0134252	3966.4	4302.24	2791.64	3885.47	1702.99	2634.88	1537.89	1518.69	1684.03	1346.1
515359	CA5A	carbonic anhydrase 5A	301.321	-0.807705	0.57129	0.232703	-3.47097	0.000518583	0.0135948	443.237	466.024	403.942	346.216	259.739	264.374	207.804	145.049	189.762	287.067
522515	SGPL1	sphingosine-1-phosphate lyase 1	477.863	-0.906708	0.533401	0.2612	-3.47132	0.000517909	0.0135948	833.91	743.787	727.519	399.48	412.8	473.362	318.137	336.72	292.145	240.766
533360	ANXA7	annexin A7	426.66	1.17133	2.2522	0.338192	3.46351	0.000533181	0.0137752	157.69	135.795	172.363	316.781	526.435	717.798	662.672	473.135	516.329	587.603
540254	DGCR8	DGCR8, microprocessor complex subunit	25.1844	1.316	2.48974	0.379982	3.46332	0.00053356	0.0137752	19.8888	9.25876	17.9765	9.81179	14.6876	18.4619	42.6439	49.2129	37.0698	32.8317
537380	MAP3K5	mitogen-activated protein kinase kinase kinase 5	2477.66	-0.67491	0.626371	0.194988	-3.46129	0.000537587	0.0137752	4131.19	2893.36	2594.96	3078.1	2538.64	2230.19	2235.76	1377.1	2002.65	1694.62
444990	EIF5A	eukaryotic translation initiation factor 5A	258.75	-0.778046	0.583156	0.225531	-3.44984	0.000560911	0.0137935	375.046	418.187	348.955	313.977	180.117	193.48	197.651	182.174	217.123	160.791
NA	ERO1L	NA	71.9807	-1.10594	0.464599	0.319992	-3.45615	0.000547948	0.0137935	150.587	120.364	76.1357	100.921	44.8359	62.7704	39.9363	41.4425	43.2481	39.5664
521960	IP6K3	inositol hexakisphosphate kinase 3	606.564	-0.690209	0.619764	0.199999	-3.45107	0.00055837	0.0137935	777.085	979.885	727.519	775.131	487.784	505.117	533.387	445.506	473.081	361.148
524075	PDK2	pyruvate dehydrogenase kinase 2	402.516	-0.974717	0.50884	0.282099	-3.45523	0.000549824	0.0137935	599.506	776.193	480.078	545.255	268.242	350.037	226.757	176.13	259.488	343.47
510748	PLEKHA4	pleckstrin homology domain containing A4	332.26	-0.876136	0.544825	0.253851	-3.45138	0.000557726	0.0137935	510.006	586.388	434.608	410.693	211.038	292.436	225.403	240.021	189.762	222.245
513128	RPL7A	ribosomal protein L7a	3477.32	-1.33473	0.396466	0.386986	-3.44904	0.000562588	0.0137935	6749.41	5629.32	4953.05	5549.27	2020.71	3943.46	1275.93	836.62	1462.49	2352.94
530962	MPHOSPH9	M-phase phosphoprotein 9	2019.86	-0.777783	0.583263	0.225818	-3.44429	0.000572561	0.0139378	3190.74	3421.11	2084.22	2628.16	1435.52	1457.75	1349.04	1365.01	1601.06	1666
509246	CSK	C-terminal Src kinase	219.773	-0.865602	0.548818	0.251494	-3.44184	0.000577782	0.0139651	349.475	356.462	245.326	318.182	151.514	208.988	136.731	138.142	144.749	148.163
783019	DIRC2	disrupted in renal carcinoma 2	426.954	-0.811121	0.569939	0.236159	-3.43464	0.000593331	0.0142399	630.76	680.519	452.585	619.544	337.815	325.667	259.925	225.343	326.567	410.817
510379	MON1B	MON1 homolog B, secretory trafficking associated	28.4004	1.33499	2.52275	0.389652	3.42612	0.000612269	0.0145917	9.94441	9.25876	8.45952	21.0253	30.1483	31.0159	40.6132	42.3058	43.2481	47.9848
NA	SUV420H1	NA	795.712	-0.964192	0.512565	0.281749	-3.42216	0.000621247	0.0147028	1204.69	1498.38	1001.4	975.572	582.094	712.628	528.649	584.511	592.234	276.965
NA	AZI1	NA	40587.6	-0.851282	0.554292	0.248955	-3.41942	0.000627541	0.0147264	59190.6	75360.1	43900.7	52389.3	30293.6	33198.1	24817.4	19750.8	31373.4	35602.2
539784	PSMD2	proteasome 26S subunit, non-ATPase 2	72.879	0.886652	1.84888	0.259408	3.41798	0.000630882	0.0147264	59.6665	38.5782	62.389	53.264	41.7438	62.0319	80.5495	107.923	99.7353	122.908
539132	TMED3	transmembrane p24 trafficking protein 3	1922.17	-1.078	0.473684	0.316005	-3.41135	0.000646422	0.0149864	3304.39	2859.41	2952.37	2893.08	1035.09	2028.59	842.724	1354.65	1020.3	931.073
100144618	CTCFL	CCCTC-binding factor like	17641.1	-0.80342	0.572989	0.235694	-3.40875	0.000652622	0.015028	25727.6	29884.2	20747	21298.6	14494.4	17202	9129.85	9784.74	14817.3	13325.5
404148	PGAM1	phosphoglycerate mutase 1	502.474	-0.487597	0.713212	0.143296	-3.40272	0.000667179	0.01526	556.887	638.854	652.441	606.929	479.28	433.485	402.071	481.769	387.467	385.562
512840	POU2F1	POU class 2 homeobox 1	568.306	-0.979228	0.507251	0.288278	-3.39682	0.000681731	0.0154889	1018.59	1055.5	593.224	689.628	415.119	567.887	302.568	254.698	373.346	412.501
527084	CCDC77	coiled-coil domain containing 77	313.072	-0.757795	0.5914	0.22485	-3.37022	0.00075109	0.0161461	461.705	496.887	389.138	357.429	263.604	260.682	199.005	163.18	243.601	295.485
286861	FTL	ferritin light chain	811.87	-0.933111	0.523728	0.27668	-3.37253	0.000744819	0.0161461	1179.12	1752.99	918.916	887.266	591.37	464.501	565.877	400.61	623.125	734.924
287019	PFKFB2	6-phosphofructo-2-kinase/fructose-2,6-biphosphatase 2	27.0746	1.4403	2.71376	0.42674	3.37511	0.00073786	0.0161461	4.26189	16.9744	13.7467	12.6152	23.964	25.8466	36.5519	63.0271	47.6611	26.097
613932	PLD3	phospholipase D family member 3	83.8072	-0.924616	0.526821	0.274275	-3.37113	0.000748601	0.0161461	119.333	148.14	121.606	99.5196	61.8426	73.109	62.9505	63.0271	39.7176	48.8266
538553	PRRC2A	proline rich coiled-coil 2A	2837.44	-1.14537	0.452075	0.339902	-3.3697	0.000752504	0.0161461	4432.37	7380.77	1991.16	3474.77	2262.67	2354.26	1131.08	2351	1499.56	1496.79
541250	PSRC1	proline and serine rich coiled-coil 1	661.711	-1.02068	0.492884	0.302925	-3.36941	0.000753297	0.0161461	1062.63	1248.39	682.049	1014.82	425.941	553.118	333.028	275.42	413.063	608.649
767907	REG4	regenerating family member 4	185.893	-0.855696	0.552599	0.253636	-3.37371	0.000741613	0.0161461	264.237	302.453	228.407	263.517	140.692	183.88	144.854	125.191	115.622	90.0766
540999	SAMD10	sterile alpha motif domain containing 10	181.182	-0.792734	0.577249	0.234768	-3.37667	0.000733681	0.0161461	220.198	274.676	252.728	260.713	142.238	180.926	138.762	98.4258	124.449	118.699
514521	TBC1D9B	TBC1 domain family member 9B	508.423	-0.527318	0.693844	0.156328	-3.37315	0.000743147	0.0161461	673.379	686.691	578.42	583.101	482.372	408.377	447.422	363.485	487.203	373.776
540661	BRWD1	bromodomain and WD repeat domain containing 1	1392.56	-0.826167	0.564026	0.24565	-3.36319	0.000770477	0.0162619	2254.54	2365.61	1495.22	1666.6	1123.22	985.864	857.615	685.527	1139.45	1351.99
532845	COG3	component of oligomeric golgi complex 3	151.245	0.71127	1.63725	0.211487	3.36319	0.000770464	0.0162619	83.8172	83.3288	151.214	127.553	125.231	182.403	185.467	158.863	190.645	223.929
787914	RPS6	ribosomal protein S6	133.715	-0.794814	0.576418	0.236391	-3.36228	0.000773014	0.0162619	191.785	219.124	161.788	173.809	103.586	86.4016	117.778	96.6991	112.092	74.0817
616206	CAMSAP3	calmodulin regulated spectrin associated protein family member 3	202.081	-0.77572	0.584097	0.230948	-3.35886	0.000782656	0.0162979	210.253	243.814	363.76	270.525	187.847	200.865	146.208	139.005	111.209	147.322
782214	IL17RD	interleukin 17 receptor D	122.102	0.700264	1.6248	0.208542	3.3579	0.000785357	0.0162979	85.2378	84.8719	77.1932	93.9128	122.139	127.756	160.422	134.688	140.336	194.465
515820	SH2D3C	SH2 domain containing 3C	353.562	-0.690679	0.619562	0.205768	-3.3566	0.00078907	0.0162979	475.911	553.982	475.848	382.66	296.845	336.006	297.153	223.617	261.254	232.347
540689	SPAG9	sperm associated antigen 9	747.982	-1.04479	0.484714	0.312113	-3.34749	0.000815468	0.0167417	1216.06	1504.55	750.783	1012.02	555.811	646.904	400.04	244.338	478.377	670.945
617577	C23H6orf25	chromosome 23 open reading frame, human C6orf25(C23H6orf25)	226.204	-0.672582	0.627383	0.201641	-3.33554	0.000851335	0.0171323	321.062	347.203	284.451	259.312	180.117	169.849	187.498	198.578	163.284	150.689
281168	FMOD	fibromodulin	1397.49	-0.814626	0.568556	0.243964	-3.33913	0.000840415	0.0171323	1990.3	2109.45	2284.07	1516.62	1010.35	1444.46	948.318	997.209	849.957	824.159
536073	KDM3A	lysine demethylase 3A	78.7935	-1.02668	0.490838	0.307778	-3.33579	0.000850582	0.0171323	164.793	129.623	81.4229	74.2892	78.8493	62.0319	28.4292	57.8468	62.6656	47.9848
506730	MACF1	microtubule-actin crosslinking factor 1	763.915	-0.725747	0.604684	0.21765	-3.33448	0.000854604	0.0171323	1065.47	1276.17	958.041	920.906	541.896	621.057	496.835	672.577	551.633	534.567
NA	MEF2BNB	NA	190.494	-1.02893	0.490073	0.308968	-3.33021	0.000867793	0.017295	349.475	365.721	209.373	241.09	114.409	177.972	117.101	86.3385	112.975	130.485
517987	NEBL	nebulette	1091.51	-0.55804	0.679224	0.167743	-3.32675	0.000878657	0.017309	1275.73	1430.48	1110.31	1639.97	1045.91	901.678	924.627	913.461	969.11	703.776
540564	RAD23A	RAD23 homolog A, nucleotide excision repair protein	308.538	-0.641558	0.64102	0.192814	-3.32733	0.000876819	0.017309	366.523	493.8	381.736	365.839	274.427	243.697	271.432	182.174	269.197	236.556
613954	RAB37	RAB37, member RAS oncogene family	221.045	-0.928959	0.525237	0.279813	-3.31993	0.000900396	0.0176353	289.809	405.842	329.921	262.115	163.11	234.835	158.391	123.464	138.57	104.388
505740	ADCY5	adenylate cyclase 5	396.383	-0.610188	0.655111	0.184178	-3.31303	0.000922927	0.0178303	595.244	526.206	418.746	510.213	346.319	288.744	267.37	318.589	318.623	373.776
538936	ARL4D	ADP ribosylation factor like GTPase 4D	666.096	-0.911031	0.531805	0.275063	-3.31208	0.000926047	0.0178303	1032.8	1015.38	988.707	845.215	467.685	745.121	361.458	355.714	353.045	495.842
514449	EIF3L	eukaryotic translation initiation factor 3 subunit L	154.545	-1.34013	0.394984	0.404616	-3.31211	0.000925951	0.0178303	275.602	327.143	241.096	187.826	77.3033	169.111	92.7335	75.9778	58.2525	40.4082
528582	CCBL1	NA	237.697	-1.18187	0.440779	0.357177	-3.30893	0.000936533	0.0179309	390.673	496.887	299.256	312.576	151.514	210.465	130.639	58.7102	119.153	207.092
538104	ZMPSTE24	zinc metallopeptidase STE24	814.239	-0.975821	0.50845	0.295126	-3.30646	0.000944844	0.017989	1613.84	1441.28	908.341	971.367	464.593	638.042	504.281	379.889	585.173	635.588
518158	ADPGK	ADP dependent glucokinase	67.6442	-1.30236	0.405463	0.395098	-3.2963	0.000979686	0.018513	107.968	137.338	135.352	65.8791	35.5595	69.4166	35.875	30.2185	34.4219	24.4133
506103	UBE2J2	ubiquitin conjugating enzyme E2 J2	52661.8	-0.721225	0.606582	0.218866	-3.29528	0.00098323	0.018513	68525.5	88936.5	56896.6	67751.8	45679.3	36249.5	37641	27497.9	47014.2	50426.1
506607	AGPAT3	1-acylglycerol-3-phosphate O-acyltransferase 3	144.818	-0.875343	0.545124	0.265967	-3.29117	0.000997701	0.0186822	221.618	257.702	171.305	192.031	96.6291	132.187	106.271	79.4314	89.144	101.862
615387	CDK2AP1	cyclin dependent kinase 2 associated protein 1	184.093	-0.714148	0.609565	0.217632	-3.28145	0.00103276	0.0187215	272.761	294.737	225.235	208.851	144.557	159.511	158.391	128.644	125.331	122.908
506131	CTPS1	CTP synthase 1	219.604	-0.605286	0.657341	0.184428	-3.28197	0.00103086	0.0187215	281.285	337.945	235.809	271.927	200.215	175.019	169.899	170.087	206.532	147.322
518169	CTSA	cathepsin A	385.547	-1.43077	0.370933	0.435281	-3.28701	0.00101258	0.0187215	750.093	862.608	573.133	445.735	181.663	454.162	168.545	200.305	135.04	84.1838
524491	CUX2	cut like homeobox 2	75.1911	-0.804833	0.572428	0.245086	-3.28388	0.00102388	0.0187215	96.6029	108.019	82.4804	107.93	84.2606	62.7704	64.3042	58.7102	57.3699	29.4643
505642	GSTO1	glutathione S-transferase omega 1	28.7243	-1.1221	0.459425	0.341914	-3.28181	0.00103142	0.0187215	34.0951	29.3194	51.8146	36.4438	44.0629	16.2464	9.47641	23.3114	26.4784	15.9949
525675	MARK4	microtubule affinity regulating kinase 4	144.614	-0.911325	0.531696	0.277547	-3.28349	0.00102529	0.0187215	208.833	266.961	178.707	194.834	96.6291	142.526	100.179	86.3385	96.2049	74.9236
520580	CDK9	cyclin dependent kinase 9	577.81	-0.644857	0.639556	0.196642	-3.27934	0.00104052	0.0187623	738.728	841.004	826.918	681.218	438.31	543.517	436.592	417.878	443.955	409.975
618423	GFER	growth factor, augmenter of liver regeneration	113.934	-0.648872	0.637779	0.198221	-3.27347	0.00106235	0.0190004	146.325	158.942	159.674	130.357	102.04	104.125	95.441	85.4751	81.2004	75.7654
508577	MSS51	MSS51 mitochondrial translational activator	227.462	1.25342	2.38407	0.382982	3.2728	0.00106487	0.0190004	59.6665	57.0957	118.433	140.168	293.752	391.392	395.979	260.742	275.375	282.016
614520	BNIP1	BCL2 interacting protein 1	102.865	-1.00551	0.498093	0.307667	-3.26819	0.00108239	0.0190143	150.587	140.424	162.846	183.621	50.2471	83.4477	60.9198	70.7975	61.7829	63.9797
617304	FBXL12	F-box and leucine rich repeat protein 12	70.8042	-1.1767	0.442363	0.359934	-3.26921	0.0010785	0.0190143	133.539	123.45	99.3994	95.3145	40.1977	72.3705	30.4599	35.3988	28.2436	49.6684
791050	MIRLET7G	microRNA let-7g	57.7492	-1.22119	0.42893	0.373655	-3.26822	0.00108228	0.0190143	115.071	115.734	64.5039	79.896	30.1483	52.4317	31.8137	20.7212	32.6567	34.5154
538348	EHD2	EH domain containing 2	379.6	-1.08437	0.471598	0.331954	-3.26662	0.00108838	0.0190216	595.244	822.486	499.112	463.957	200.215	368.499	243.679	263.332	168.579	170.893
514939	PGD	phosphogluconate dehydrogenase	146.966	-1.05157	0.482443	0.322166	-3.26406	0.00109828	0.0190432	213.095	324.057	186.11	168.202	101.267	152.126	78.5189	59.5735	87.3787	99.3369
538657	TRIM68	tripartite motif containing 68	167.383	-0.787786	0.579232	0.2414	-3.26341	0.00110079	0.0190432	267.078	266.961	204.086	199.039	124.458	142.526	108.979	92.3822	122.683	145.638
513493	MYO9B	myosin IXB	1741.17	-0.822681	0.56539	0.252213	-3.26185	0.00110688	0.0190517	2305.68	3365.56	2326.37	1970.77	1156.46	1487.29	1254.27	944.543	1191.53	1409.24
527391	C8A	complement C8 alpha chain	262.705	0.664119	1.5846	0.204112	3.2537	0.00113911	0.0195079	205.991	158.942	156.501	207.449	285.249	382.53	333.028	265.922	329.215	302.22
539528	KCNB1	potassium voltage-gated channel subfamily B member 1	256.619	-0.742411	0.59774	0.228381	-3.25076	0.00115095	0.0196123	339.531	458.309	282.337	340.609	187.847	200.865	217.958	175.267	195.94	167.526
518494	GPS2	G protein pathway suppressor 2	191.618	-0.833002	0.56136	0.256851	-3.24314	0.00118221	0.0196535	234.404	331.772	269.647	245.295	147.649	192.003	125.901	89.792	132.392	147.322
NA	KIAA0020	NA	406.59	-1.17574	0.442658	0.362479	-3.24359	0.00118032	0.0196535	809.759	807.055	446.24	534.042	222.633	465.239	222.019	209.802	195.058	154.056
789905	LYPD5	LY6/PLAUR domain containing 5	74.6681	-1.00707	0.497554	0.310065	-3.24795	0.0011624	0.0196535	100.865	128.079	112.089	110.733	47.928	71.6321	38.5825	33.672	45.0133	58.0868
281368	OLR1	oxidized low density lipoprotein receptor 1	634.329	-0.688566	0.62047	0.212041	-3.24733	0.00116493	0.0196535	975.973	972.17	720.117	765.319	483.145	559.025	444.715	385.933	504.855	532.042
100847824	VARS2	valyl-tRNA synthetase 2, mitochondrial	43.0913	-1.59418	0.331209	0.491142	-3.24587	0.00117091	0.0196535	113.65	74.0701	77.1932	16.8202	41.7438	14.031	8.12264	17.2677	32.6567	35.3572
529235	DDIT4	DNA damage inducible transcript 4	770.959	-0.782597	0.58132	0.241715	-3.23768	0.00120506	0.0198397	1206.12	1134.2	748.668	1198.44	589.824	689.735	467.729	410.108	626.656	638.113
540664	TNC	tenascin C	118.808	0.676668	1.59844	0.208937	3.23863	0.00120106	0.0198397	68.1903	118.821	72.9634	85.5027	111.317	132.187	159.745	164.043	146.514	128.801
282710	ATP5H	NA	105.014	-0.716803	0.608444	0.221763	-3.2323	0.00122799	0.0199731	123.595	157.399	146.984	126.152	99.7212	96.0017	75.1344	69.9342	97.9701	57.245
505290	MGLL	monoglyceride lipase	225.253	-1.00753	0.497397	0.311769	-3.23166	0.00123073	0.0199731	399.197	299.367	323.577	346.216	136.827	194.957	104.917	92.3822	142.101	212.985
524314	PWWP2B	PWWP domain containing 2B	375.388	-0.655835	0.634708	0.202849	-3.23312	0.00122448	0.0199731	447.499	597.19	536.122	384.061	333.177	317.544	337.09	288.37	294.793	218.036
534475	RFX2	regulatory factor X2	1330.94	-0.796314	0.575819	0.246647	-3.22856	0.00124417	0.0200954	1852.5	2109.45	1493.11	2116.54	876.619	1337.38	914.474	876.335	829.657	903.292
517059	SGCD	sarcoglycan delta	131.883	-1.08504	0.471379	0.336245	-3.22694	0.00125124	0.0201142	211.674	282.392	140.64	200.441	62.6157	107.079	73.1038	68.2074	75.0222	97.6532
281661	CAPN1	calpain 1	276.439	-0.876217	0.544794	0.272019	-3.22116	0.00127671	0.0202517	363.681	487.628	329.921	414.898	194.804	221.542	170.575	114.83	221.536	244.975
513397	DNAJA3	DnaJ heat shock protein family (Hsp40) member A3	200.693	-1.07052	0.476148	0.332361	-3.22096	0.00127763	0.0202517	396.356	319.427	237.924	287.345	119.82	203.081	104.241	88.9286	86.4961	163.317
616432	PRIMA1	proline rich membrane anchor 1	458.798	-0.911958	0.531463	0.283112	-3.22119	0.0012766	0.0202517	613.712	1020.01	440.953	620.946	302.256	342.652	354.012	245.201	292.145	356.097
522188	PTPRQ	protein tyrosine phosphatase, receptor type Q	449.387	-0.683987	0.622443	0.212443	-3.21963	0.00128356	0.0202517	715.998	686.691	532.95	498.999	337.042	330.098	314.075	317.726	403.354	356.939
510684	PPIP5K1	diphosphoinositol pentakisphosphate kinase 1	9644.17	-0.760205	0.590412	0.236584	-3.21325	0.00131241	0.0206116	14338.4	15756.9	10552.2	13473	6521.3	9530.02	6335.66	6643.74	6241.84	7048.71
513458	NEIL1	nei like DNA glycosylase 1	110.917	-0.880208	0.543289	0.274124	-3.21098	0.00132283	0.0206798	139.222	179.003	125.835	204.646	71.892	90.0939	86.6415	69.0708	65.3134	77.4491
506578	ELL	elongation factor for RNA polymerase II	202.865	-0.94365	0.519916	0.294085	-3.20877	0.00133305	0.0207445	309.697	364.178	268.59	274.73	119.047	192.742	122.516	90.6554	133.275	153.214
513606	POLH	DNA polymerase eta	383.14	-0.608047	0.656084	0.189859	-3.20262	0.00136183	0.0210959	558.308	550.896	494.882	349.019	361.779	330.098	298.507	301.321	342.454	244.133
513267	DSTN	destrin, actin depolymerizing factor	36.9069	-1.08438	0.471595	0.339507	-3.19398	0.00140324	0.0215203	49.7221	80.2426	45.4699	51.8623	24.737	25.8466	26.3986	15.5409	27.361	21.8878
616115	NFKB1	nuclear factor kappa B subunit 1	2337.31	-0.617367	0.65186	0.193253	-3.19461	0.00140021	0.0215203	3351.27	3793	2404.62	2614.14	1989.01	1668.95	1949.43	1647.34	2139.46	1815.84
517743	NOL11	nucleolar protein 11	919.664	-0.823087	0.565231	0.257781	-3.19297	0.00140816	0.0215203	1449.04	1569.36	1043.69	1213.86	601.42	806.415	531.356	572.424	561.342	847.731
516078	SNAPC2	small nuclear RNA activating complex polypeptide 2	2122.53	-0.975098	0.508705	0.30603	-3.18629	0.00144112	0.0219256	2369.61	4992.01	2949.2	2352.03	1406.92	1451.84	1493.89	1633.52	1755.52	820.792
783152	ZNF322	zinc finger protein 322	111.38	1.16303	2.23927	0.365446	3.18249	0.00146014	0.0221162	75.2934	24.69	50.7571	61.6741	129.096	155.818	142.823	137.278	101.501	234.873
515301	CDC6	cell division cycle 6	846.42	-0.889696	0.539728	0.280065	-3.17675	0.00148934	0.0221191	1507.29	813.228	1188.56	1290.95	698.049	982.91	445.391	612.14	484.555	441.123
534583	CNN1	calponin 1	80.0533	-1.11593	0.461393	0.351771	-3.17232	0.00151225	0.0221191	149.166	163.571	113.146	81.2977	41.7438	66.4627	49.4127	57.8468	45.8959	31.9898
533936	KLHL2	kelch like family member 2	304.222	-0.714679	0.609341	0.224693	-3.1807	0.00146921	0.0221191	446.078	507.689	337.324	372.848	228.818	261.42	246.387	182.174	251.545	207.934
789612	LOC789612	uncharacterized LOC789612	75.1885	-0.918032	0.52923	0.28927	-3.17362	0.00150553	0.0221191	103.706	124.993	90.9399	109.331	64.1617	86.4016	47.3821	36.2622	43.2481	45.4592
281918	MRVI1	murine retrovirus integration site 1 homolog	85.3779	1.0945	2.13539	0.344988	3.17258	0.00151092	0.0221191	45.4602	20.0606	61.3315	58.8707	84.2606	76.0629	125.224	165.77	135.922	80.8164
522866	PLA2G4F	phospholipase A2 group IVF	27.3804	1.14486	2.21125	0.36055	3.17532	0.00149671	0.0221191	15.6269	27.7763	13.7467	9.81179	18.5528	25.8466	37.9057	48.3495	27.361	48.8266
282034	RBBP6	RB binding protein 6, ubiquitin ligase	587.957	-0.462835	0.725559	0.145627	-3.17823	0.00148177	0.0221191	765.72	743.787	721.174	644.775	534.166	513.24	491.42	429.102	526.038	510.154
511555	RNMT	RNA guanine-7 methyltransferase	289.764	-1.12456	0.458643	0.353976	-3.17693	0.00148843	0.0221191	483.014	699.036	360.587	332.199	112.863	192.003	163.13	207.212	198.588	149.005
512474	DISP2	dispatched RND transporter family member 2	401.234	-0.744743	0.596774	0.235074	-3.16813	0.00153425	0.0223451	539.84	586.388	575.248	534.042	279.065	380.315	305.953	207.212	306.267	298.011
529891	CFAP70	cilia and flagella associated protein 70	313.628	0.996476	1.99512	0.315683	3.15657	0.00159634	0.0223636	161.952	112.648	145.927	225.671	398.112	496.255	469.759	274.556	443.955	407.45
506315	DNM3	dynamin 3	67.663	0.791158	1.73046	0.250083	3.16358	0.00155843	0.0223636	46.8808	50.9232	58.1592	39.2471	51.7932	95.2633	69.7193	122.601	67.9612	74.0817
523325	DVL1	dishevelled segment polarity protein 1	17368.4	-0.803961	0.572774	0.254765	-3.1557	0.00160115	0.0223636	24770.1	30864.1	19382.9	22704.5	12711.8	14032.5	10878.2	8029.48	13578.1	16732.4
512581	F2RL2	coagulation factor II thrombin receptor like 2	624.66	-0.509	0.702709	0.161088	-3.15976	0.00157901	0.0223636	818.283	765.391	664.073	881.659	541.896	511.025	504.957	466.228	536.629	556.455
507026	ICOS	inducible T cell costimulator	15188.1	-0.623991	0.648873	0.197636	-3.15728	0.0015925	0.0223636	20275.2	21147	17880.3	20370.7	12441.2	13339.1	11237	9694.95	9914.4	15581.6
790068	LILRA4	leukocyte immunoglobulin-like receptor, subfamily A (with TM domain), member 4	78.2174	-0.892175	0.538801	0.282155	-3.162	0.00156689	0.0223636	125.015	143.511	98.342	91.1095	51.7932	59.078	54.1509	56.9834	61.7829	40.4082
616371	LURAP1L	leucine rich adaptor protein 1 like	120.106	1.403	2.6445	0.443656	3.16235	0.001565	0.0223636	39.7776	27.7763	41.2402	64.4775	153.834	65.7243	239.618	188.218	216.24	164.158
614193	MIIP	migration and invasion inhibitory protein	1615.47	-0.658328	0.633612	0.208233	-3.1615	0.00156959	0.0223636	2226.13	2459.74	2096.9	1920.31	1188.15	1581.81	1213.66	1285.58	1137.69	1044.72
513277	NUDC	nuclear distribution C, dynein complex regulator	1302.96	-0.548294	0.683828	0.173209	-3.16551	0.00154811	0.0223636	1734.59	1945.88	1561.84	1253.11	1244.58	1058.97	1143.26	932.455	1233.89	920.971
282375	STAT5A	signal transducer and activator of transcription 5A	125.39	-1.23071	0.426109	0.38976	-3.1576	0.00159073	0.0223636	261.396	209.865	169.19	172.407	67.2539	149.172	40.6132	65.6172	66.196	52.1939
281299	MC2R	melanocortin 2 receptor	415.657	-0.949569	0.517787	0.301246	-3.15214	0.00162078	0.0225453	613.712	719.097	582.65	571.887	252.782	482.963	250.448	225.343	212.71	244.975
532761	OVOL2	ovo like zinc finger 2	68.0912	-0.941445	0.520711	0.299776	-3.14049	0.00168665	0.0233041	119.333	91.0445	90.9399	88.3061	58.7505	39.8776	45.3514	23.3114	60.0177	63.9797
616537	RAB6A	RAB6A, member RAS oncogene family	1918.12	-1.00216	0.499251	0.319361	-3.13803	0.0017009	0.0233041	2608.28	3228.22	3235.77	2507.61	1215.21	2406.69	1083.02	874.609	1015.01	1006.84
614210	RNF166	ring finger protein 166	230.784	-0.837209	0.559725	0.266759	-3.13844	0.00169848	0.0233041	285.547	412.015	238.982	361.634	183.209	193.48	165.16	97.5625	160.636	209.618
614027	SIRT3	sirtuin 3	144.661	-0.737305	0.599859	0.234981	-3.13772	0.00170268	0.0233041	207.412	205.236	174.478	215.859	102.813	113.725	97.4717	108.786	133.275	87.5511
505541	RASIP1	Ras interacting protein 1	1410.94	-0.783394	0.580998	0.250162	-3.13154	0.00173889	0.0237046	1983.2	2493.69	1620	1752.1	1076.83	1098.85	816.325	739.057	1048.54	1480.79
519751	SPECC1L	sperm antigen with calponin homology and coiled-coil domains 1 like	494.173	-0.647848	0.638232	0.207338	-3.1246	0.00178045	0.0241744	747.252	754.589	492.767	643.373	381.105	333.791	418.993	381.616	370.698	417.552
528348	CCDC113	coiled-coil domain containing 113	123.377	-0.90589	0.533703	0.290316	-3.12036	0.0018063	0.024428	125.015	222.21	186.11	163.997	108.225	122.587	87.9953	44.0326	76.7874	96.8114
540393	ARHGAP12	Rho GTPase activating protein 12	112.865	0.842479	1.79313	0.270535	3.11412	0.00184495	0.0248521	79.5553	55.5525	61.3315	63.0758	141.465	135.141	159.068	125.191	149.162	159.107
509602	ERCC5	ERCC excision repair 5, endonuclease	778.469	-1.02338	0.491963	0.329286	-3.10787	0.0018844	0.0249633	1321.19	1285.42	1065.9	1143.77	402.75	872.139	393.948	314.272	499.559	485.74
520167	LAMB2	laminin, beta 2 (laminin S)	194.546	0.68364	1.60619	0.220192	3.10474	0.00190448	0.0249633	113.65	118.821	142.754	148.578	219.541	196.434	301.891	233.977	238.306	231.505
525389	MED27	mediator complex subunit 27	219.726	-1.01053	0.496365	0.325366	-3.10582	0.00189755	0.0249633	323.904	291.651	446.24	262.115	145.33	257.728	139.439	124.327	97.0875	109.439
535844	OCRL	OCRL, inositol polyphosphate-5-phosphatase	995.056	-0.483277	0.715351	0.155419	-3.1095	0.00187402	0.0249633	1223.16	1401.16	1010.91	1227.88	940.781	913.493	823.771	688.118	887.027	834.261
613725	PCBP3	poly(rC) binding protein 3	232.542	-0.68523	0.621907	0.220585	-3.10643	0.00189362	0.0249633	311.118	378.066	264.36	319.584	163.11	200.865	178.698	167.497	171.227	170.893
506243	PLA2G2E	phospholipase A2 group IIE	172.838	-0.79349	0.576947	0.255134	-3.11009	0.00187028	0.0249633	272.761	308.625	179.765	208.851	128.323	146.956	149.592	127.781	97.9701	107.755
507116	ZCCHC3	zinc finger CCHC-type containing 3	275.023	-0.731353	0.602339	0.235535	-3.10508	0.0019023	0.0249633	400.618	438.248	341.553	320.986	217.222	278.405	238.941	184.764	171.227	158.266
782347	DNMBP	dynamin binding protein	302.415	-0.835916	0.560227	0.269402	-3.10286	0.00191659	0.0250258	512.848	566.327	314.06	356.028	190.939	228.927	206.45	195.988	193.292	259.286
508384	GATAD2A	GATA zinc finger domain containing 2A	926.309	-1.00198	0.499315	0.323247	-3.09972	0.00193702	0.0251863	1456.15	1777.68	926.318	1513.82	505.563	644.689	498.189	420.468	543.69	976.532
507828	SRSF6	serine and arginine rich splicing factor 6	3182.35	-0.879316	0.543625	0.283769	-3.09871	0.00194366	0.0251863	4680.98	5780.55	3915.7	3844.82	2395.63	2979.01	2501.1	2341.5	2333.63	1050.61
513928	ATF6B	activating transcription factor 6 beta	237.714	-0.730075	0.602872	0.236052	-3.09286	0.00198239	0.0254045	326.745	412.015	263.303	274.73	207.946	214.896	159.745	115.694	193.292	208.776
614804	LGALS4	galectin 4	591.748	-0.671214	0.627978	0.21708	-3.09201	0.00198804	0.0254045	863.743	922.79	647.154	797.558	405.842	412.807	440.653	484.359	503.972	438.598
510132	XRCC6	X-ray repair cross complementing 6	1534.62	-0.713712	0.609749	0.23085	-3.09167	0.00199032	0.0254045	1968.99	2532.27	1682.39	2297.36	1054.42	1076.7	1202.15	903.964	1342.46	1285.49
512243	ZSWIM1	zinc finger SWIM-type containing 1	986.168	-1.03013	0.489667	0.332932	-3.09411	0.00197401	0.0254045	1515.81	1617.2	1651.72	1225.07	611.469	1250.24	598.368	458.457	504.855	428.495
534607	CIDEC	cell death inducing DFFA like effector c	375.225	-0.711428	0.610715	0.230509	-3.08633	0.00202641	0.0257687	646.387	547.81	383.851	476.573	276.746	286.528	248.417	270.239	353.045	262.653
532126	ANO1	anoctamin 1	78.9499	-0.898744	0.536353	0.291972	-3.07819	0.00208262	0.02592	109.389	134.252	100.457	110.733	60.2966	86.4016	42.6439	48.3495	58.2525	38.7245
515687	GUSB	glucuronidase beta	294.872	-0.793895	0.576785	0.258092	-3.07601	0.00209791	0.02592	430.451	516.947	401.827	299.96	222.633	274.713	245.71	171.814	235.658	149.005
532791	KEAP1	kelch like ECH associated protein 1	45.6119	-0.866343	0.548536	0.281508	-3.07751	0.00208739	0.02592	88.0791	58.6388	45.4699	49.0589	54.1123	31.7544	37.9057	22.448	28.2436	40.4082
NA	LOC513486	NA	527.685	-0.934059	0.523384	0.303125	-3.08144	0.00206005	0.02592	752.934	1121.85	722.232	553.665	314.624	436.439	369.58	334.993	446.602	223.929
522943	NBN	nibrin	318.647	-0.655685	0.634774	0.213173	-3.07583	0.00209916	0.02592	438.975	450.593	384.908	395.275	280.611	214.896	224.726	182.174	268.315	345.995
516557	SAV1	salvador family WW domain containing protein 1	7663.21	-0.55482	0.680742	0.180143	-3.07988	0.00207084	0.02592	10538.2	8939.33	8150.75	10885.5	7082.53	6374.51	6835.88	7118.61	6275.38	4431.43
614775	SEC22B	SEC22 homolog B, vesicle trafficking protein	195.372	-0.670111	0.628459	0.217426	-3.08202	0.00205599	0.02592	302.594	277.763	224.177	231.278	165.429	166.157	129.962	188.218	155.34	112.806
615240	SNRPF	small nuclear ribonucleoprotein polypeptide F	283.74	-0.982262	0.506186	0.31904	-3.0788	0.00207835	0.02592	357.999	492.257	453.642	421.907	159.245	327.883	155.684	168.36	161.518	138.903
523701	NCAN	neurocan	648.227	-0.909428	0.532396	0.296019	-3.07219	0.00212492	0.0261434	1002.96	1200.55	878.733	772.328	377.24	627.704	483.297	446.37	424.537	268.546
522380	TCHP	trichoplein keratin filament binding	554.981	-0.582055	0.668012	0.189665	-3.06885	0.00214883	0.0261543	649.228	870.323	744.438	634.963	430.579	480.747	456.899	449.823	406.002	426.812
516807	TMEM104	transmembrane protein 104	175.853	-1.05584	0.481017	0.343887	-3.07031	0.00213834	0.0261543	302.594	297.823	249.556	231.278	107.452	206.034	115.748	102.743	83.8483	61.4542
507169	TRRAP	transformation/transcription domain associated protein	822.822	-0.670941	0.628097	0.218629	-3.06886	0.00214876	0.0261543	1038.48	1274.62	989.764	1143.77	609.15	648.381	626.797	748.554	701.678	447.016
614679	HEXIM2	hexamethylene bisacetamide inducible 2	244.757	-0.774764	0.584484	0.252837	-3.06428	0.00218196	0.0263762	363.681	390.411	292.911	323.789	175.478	186.096	161.099	126.918	172.11	255.077
532964	MYO1F	myosin IF	1723.67	-1.05345	0.481814	0.343793	-3.0642	0.00218253	0.0263762	2635.27	3180.38	2932.28	2021.23	864.251	2040.41	1035.64	872.882	823.478	830.894
338085	COPE	coatomer protein complex subunit epsilon	109.242	-0.746655	0.595984	0.243889	-3.06146	0.00220264	0.0264458	139.222	180.546	149.099	131.758	85.0336	95.2633	60.2429	72.5243	78.5526	100.179
618141	ZNF3	zinc finger protein 3	224.727	-0.894801	0.537821	0.292295	-3.0613	0.00220381	0.0264458	345.213	370.35	306.658	292.952	147.649	251.081	132.67	107.923	123.566	169.209
280677	C3	complement C3	378.526	-0.713281	0.609931	0.233488	-3.0549	0.00225139	0.0268535	505.744	649.656	495.94	420.505	281.384	381.053	284.969	250.382	282.436	233.189
512999	MANSC1	MANSC domain containing 1	150.749	-0.493583	0.710259	0.161697	-3.05252	0.00226931	0.0268535	198.888	157.399	177.65	179.416	168.521	138.095	123.87	101.016	127.096	135.536
529251	PRSS54	serine protease 54	677.904	-0.675647	0.626051	0.221278	-3.05339	0.00226273	0.0268535	768.561	1090.99	901.997	941.932	467.685	547.21	582.123	522.348	543.69	412.501
514472	TRAP1	TNF receptor associated protein 1	144.452	-0.834063	0.560947	0.273092	-3.05414	0.00225704	0.0268535	261.396	239.185	159.674	171.005	95.8561	129.233	88.6722	87.2018	94.4396	117.857
615135	IPMK	inositol polyphosphate multikinase	63.4333	0.781449	1.71886	0.256195	3.05022	0.00228677	0.0269665	46.8808	37.035	43.3551	39.2471	64.9348	58.3395	105.594	82.0215	80.3178	76.6072
281939	MYOZ1	myozenin 1	166.48	0.913491	1.8836	0.29998	3.04517	0.00232549	0.0273286	93.7616	57.0957	90.9399	154.185	179.344	251.82	213.219	156.273	184.466	283.699
538875	MYBPHL	myosin binding protein H like	2733.88	-0.707647	0.612318	0.232527	-3.04329	0.00234006	0.0274053	4095.68	4535.25	2254.46	3641.57	2431.19	2031.54	1997.49	1468.62	2467.79	2415.23
512771	ASL	argininosuccinate lyase	538.183	-0.604434	0.657729	0.198904	-3.03882	0.00237509	0.0277202	757.196	833.288	585.822	633.561	439.083	506.594	398.686	448.96	436.011	342.628
506935	C10H15orf57	chromosome 10 open reading frame, human C15orf57(C10H15orf57)	41.0769	-0.988806	0.503895	0.326149	-3.03176	0.00243132	0.0278052	86.6584	50.9232	56.0443	47.6573	32.4674	37.6622	18.9528	24.1748	32.6567	23.5715
506812	CPT1A	carnitine palmitoyltransferase 1A	118.856	0.771106	1.70658	0.254275	3.03257	0.00242479	0.0278052	55.4046	84.8719	83.5378	89.7078	123.685	107.817	189.528	134.688	133.275	186.046
538685	ITPRIP	inositol 1,4,5-trisphosphate receptor interacting protein	38.204	-1.02696	0.490744	0.338296	-3.03568	0.00239992	0.0278052	51.1427	38.5782	59.2167	51.8623	54.8853	32.4929	12.184	38.8523	15.887	26.9388
507804	KPNB1	karyopherin subunit beta 1	558.53	-0.555607	0.680371	0.183235	-3.03221	0.00242768	0.0278052	713.156	645.027	743.381	601.322	621.518	511.763	530.002	409.244	511.033	298.852
517933	NAA40	N(alpha)-acetyltransferase 40, NatD catalytic subunit	202.35	-1.09171	0.469206	0.360057	-3.03204	0.00242909	0.0278052	333.848	384.238	316.175	199.039	144.557	172.065	85.2877	51.8031	140.336	196.148
534216	RBM5	RNA binding motif protein 5	247.615	-0.853535	0.553427	0.281147	-3.0359	0.00239816	0.0278052	433.292	481.455	252.728	232.68	195.577	250.343	161.099	140.732	162.401	165.842
533952	FAM149B1	family with sequence similarity 149 member B1	296.143	1.02448	2.03422	0.338434	3.02711	0.00246904	0.0280483	154.849	146.597	85.6527	182.219	404.296	443.823	490.743	324.633	391.88	336.735
514141	OGFOD1	2-oxoglutarate and iron dependent oxygenase domain containing 1	659.905	-0.949296	0.517885	0.313502	-3.02804	0.00246149	0.0280483	1561.27	1067.84	708.485	594.314	416.665	384.007	418.316	541.342	549.868	356.939
617610	HRC	histidine rich calcium binding protein	119.46	-0.953865	0.516248	0.315572	-3.02266	0.00250567	0.0283698	178.999	197.52	181.88	154.185	76.5302	120.371	85.2877	90.6554	67.0786	42.0919
777771	DIS3L	DIS3 like exosome 3'-5' exoribonuclease	8057.27	-0.652662	0.636106	0.216354	-3.01664	0.00255597	0.0287483	12485.9	12735.4	7233.95	10062.7	6730.8	4836.27	6638.9	5774.32	7045.9	7028.5
507455	SLC44A3	solute carrier family 44 member 3	375.519	1.02245	2.03136	0.338841	3.01749	0.00254879	0.0287483	187.523	111.105	159.674	391.07	388.062	643.212	608.521	321.179	443.955	500.894
504360	ACOT8	acyl-CoA thioesterase 8	526.638	-1.08844	0.47027	0.361053	-3.01462	0.00257298	0.0288011	869.426	805.512	916.801	769.524	221.86	553.856	399.363	236.567	294.793	198.674
613313	GBP4	guanylate binding protein 4	25.7531	1.06763	2.09599	0.354214	3.01408	0.00257756	0.0288011	11.365	16.9744	12.6893	22.4269	19.3258	26.5851	23.691	35.3988	51.1916	37.8827
535329	BEND5	BEN domain containing 5	163.061	-0.641418	0.641082	0.213017	-3.01111	0.00260294	0.0288013	217.356	253.073	207.258	187.826	129.87	149.91	113.04	108.786	145.631	117.857
281039	CAST	calpastatin	556.197	-0.903739	0.5345	0.300024	-3.01222	0.00259341	0.0288013	1014.33	641.941	700.026	810.173	459.181	671.274	272.785	268.513	268.315	455.434
532723	RAB11B	RAB11B, member RAS oncogene family	257.938	-0.94638	0.518933	0.314232	-3.01172	0.00259771	0.0288013	353.737	492.257	369.047	326.592	157.699	243.697	134.024	120.874	129.744	251.71
538796	CCNL2	cyclin L2	124.537	-0.843878	0.557144	0.280682	-3.00653	0.00264251	0.0290506	223.039	192.891	112.089	175.21	98.1752	124.064	75.8113	61.3003	93.557	89.2348
524142	OPA1	OPA1, mitochondrial dynamin like GTPase	1606.24	-0.930661	0.524618	0.309477	-3.0072	0.00263662	0.0290506	2962.01	2938.11	1813.51	1853.03	970.156	1451.1	1047.14	1301.12	1139.45	586.761
522347	MASP1	mannan binding lectin serine peptidase 1	134.459	0.798149	1.73887	0.265859	3.00215	0.00268083	0.0292829	76.714	63.2682	133.237	71.4859	143.011	182.403	199.005	127.781	164.166	183.521
514485	SLC35C2	solute carrier family 35 member C2	71.5208	-0.962578	0.513139	0.320581	-3.0026	0.0026768	0.0292829	110.809	132.709	108.916	82.6994	38.6516	64.9858	39.9363	48.3495	49.4264	38.7245
538595	CCDC89	coiled-coil domain containing 89	92.04	0.767026	1.70176	0.255579	3.00113	0.00268978	0.0292868	63.9284	46.2938	71.906	74.2892	82.7145	101.91	119.809	83.7483	102.383	173.419
540815	ABI1	abl interactor 1	107.388	0.769969	1.70523	0.256995	2.99605	0.00273502	0.0294603	76.714	46.2938	65.5613	77.0926	128.323	132.187	149.592	122.601	150.927	124.592
531699	AOX2	aldehyde oxidase 2	52.5674	1.027	2.03779	0.343073	2.99354	0.00275758	0.0294603	25.5713	23.1469	24.3211	33.6404	64.1617	65.7243	79.8726	71.6609	44.1307	93.444
523016	PAPD7	poly(A) RNA polymerase D7, non-canonical(PAPD7)	691.607	-0.618409	0.651389	0.20651	-2.99457	0.00274835	0.0294603	1024.27	1016.92	702.14	895.676	551.945	643.212	619.351	436.873	517.212	508.47
530858	PARK2	parkin RBR E3 ubiquitin protein ligase(PARK2)	242.997	-0.812039	0.569576	0.271118	-2.99515	0.0027431	0.0294603	390.673	378.066	268.59	339.208	173.159	210.465	146.884	116.557	158.87	247.5
NA	SETD8	NA	539.562	-0.611231	0.654638	0.204164	-2.99382	0.0027551	0.0294603	768.561	833.288	523.433	643.373	493.968	361.853	388.533	362.622	466.903	553.087
512685	WIPI2	WD repeat domain, phosphoinositide interacting 2	154.465	-0.939548	0.521396	0.313712	-2.99494	0.00274498	0.0294603	274.182	263.875	175.535	201.842	101.267	176.495	81.9033	76.8412	107.679	85.0256
493720	FADD	Fas associated via death domain	61.888	-0.9706	0.510294	0.324434	-2.99167	0.00277456	0.029549	65.349	114.191	116.318	74.2892	40.1977	54.6471	29.783	33.672	44.1307	46.3011
768058	ACY1	aminoacylase 1	65.512	-0.883337	0.542112	0.295729	-2.98698	0.00281747	0.0298196	102.285	108.019	99.3994	78.4943	37.8786	48.0009	46.0283	38.8523	40.6002	55.5613
525346	NCOA1	nuclear receptor coactivator 1	684.085	-0.746229	0.59616	0.249759	-2.9878	0.00280996	0.0298196	1081.1	1006.12	940.065	808.772	451.451	629.919	475.851	385.933	421.007	640.639
788015	ACPT	acid phosphatase, testicular(ACPT)	230.823	-0.870238	0.547057	0.291966	-2.98062	0.00287669	0.0303522	440.395	361.092	289.739	215.859	186.301	256.989	148.238	164.043	104.148	141.429
281123	DPP6	dipeptidyl peptidase like 6	247.287	-0.763017	0.589263	0.256112	-2.97923	0.00288973	0.0303764	342.372	421.273	364.817	249.5	179.344	228.189	161.776	126.054	193.292	206.25
510914	KRT23	keratin 23	204.686	-0.668843	0.629011	0.224558	-2.97848	0.00289681	0.0303764	232.983	325.6	286.566	269.123	143.784	141.049	157.715	140.732	180.936	168.368
337889	LRRC41	leucine rich repeat containing 41	42.9681	0.980252	1.97281	0.329263	2.97711	0.0029098	0.030419	32.6745	16.9744	20.0914	25.2303	47.928	53.1702	77.1651	54.3932	40.6002	61.4542
513158	TSTA3	tissue specific transplantation antigen P35B	136.939	-0.564067	0.676393	0.189643	-2.97436	0.00293604	0.0305995	177.579	209.865	160.731	147.177	123.685	107.079	123.193	96.6991	115.622	107.755
512642	TRAFD1	TRAF-type zinc finger domain containing 1	114.869	-0.535858	0.689748	0.180316	-2.97177	0.00296084	0.0307638	170.476	118.821	135.352	126.152	129.096	107.079	80.5495	88.0652	97.9701	95.1277
790867	PPP3CB	protein phosphatase 3 catalytic subunit beta	331.415	1.13687	2.19904	0.383593	2.96375	0.00303915	0.0312913	193.206	95.6738	93.0548	194.834	456.862	561.979	601.752	359.168	418.359	339.261
527349	RGS3	regulator of G protein signaling 3	136.551	0.53445	1.44839	0.18023	2.96537	0.00302316	0.0312913	98.0235	87.9582	114.204	134.562	121.366	172.065	136.054	163.18	157.105	180.995
525116	RUNDC3B	RUN domain containing 3B	816.249	-1.36008	0.389562	0.458821	-2.96428	0.00303387	0.0312913	2125.26	1919.65	584.765	605.527	640.071	302.036	1007.88	457.594	315.976	203.725
535350	TTI2	TELO2 interacting protein 2	76.7727	0.837305	1.78671	0.282937	2.95933	0.00308309	0.0316481	59.6665	35.4919	43.3551	44.8539	89.6718	71.6321	113.04	92.3822	100.618	117.015
100139857	RYR1	ryanodine receptor 1	1671.98	-0.647257	0.638493	0.218854	-2.95748	0.00310161	0.0317426	2399.44	2533.81	2192.07	1841.81	1239.17	1659.35	1215.69	1389.19	1272.73	976.532
767973	RNF151	ring finger protein 151	200.004	-0.693674	0.618277	0.234754	-2.95489	0.00312776	0.0319144	248.61	354.919	245.326	227.073	161.564	169.111	131.993	112.24	160.636	188.572
286811	EIF6	eukaryotic translation initiation factor 6	159.472	-0.70249	0.614511	0.237983	-2.95185	0.00315877	0.0319628	220.198	263.875	177.65	207.449	120.593	149.172	108.979	93.2455	112.975	140.587
530121	TECPR2	tectonin beta-propeller repeat containing 2	91.2781	-1.40603	0.377349	0.476351	-2.95167	0.00316064	0.0319628	193.206	124.993	176.593	98.1179	70.346	130.71	29.783	25.0382	18.5349	45.4592
539807	ZNFX1	zinc finger NFX1-type containing 1	1810.92	-0.533178	0.691031	0.180628	-2.95179	0.00315935	0.0319628	2328.41	2836.27	1733.14	2281.94	1532.15	1418.61	1485.77	1567.91	1558.7	1366.3
507207	SMPD4	sphingomyelin phosphodiesterase 4	973.344	-1.21381	0.431128	0.411419	-2.9503	0.00317467	0.0320097	1748.8	2138.77	1208.65	1209.65	496.287	1039.03	372.965	239.158	412.181	867.935
523720	NTNG2	netrin G2	93.6375	-0.650835	0.636912	0.220864	-2.94677	0.0032111	0.0322815	96.6029	154.313	120.548	121.946	80.3954	68.6782	85.9646	66.4806	73.2569	68.1889
509263	C16H1orf159	chromosome 16 C1orf159 homolog	90.8965	0.984023	1.97797	0.33451	2.94169	0.00326426	0.0326235	42.6189	38.5782	63.4464	39.2471	118.274	109.294	169.222	95.8357	129.744	102.704
540545	SYT13	synaptotagmin 13	124.415	-0.64495	0.639515	0.21918	-2.94256	0.00325509	0.0326235	150.587	174.373	176.593	149.98	108.225	124.802	71.75	107.06	86.4961	94.2858
518991	TMEM129	transmembrane protein 129	323.152	-0.636762	0.643155	0.216713	-2.93827	0.00330051	0.0328893	454.602	544.724	377.506	339.208	252.782	290.959	243.679	271.103	251.545	205.408
767930	CENPO	centromere protein O	394.355	-0.903139	0.534722	0.308013	-2.93215	0.00336626	0.0334467	427.61	996.86	467.389	431.719	247.37	242.958	279.554	271.966	341.571	236.556
519774	C13H20orf194	chromosome 13 C20orf194 homolog	383.935	-0.556447	0.679975	0.189917	-2.92995	0.00339022	0.0335868	490.117	595.647	482.193	426.112	293.752	309.421	324.906	306.502	317.741	292.96
617215	PTPN18	protein tyrosine phosphatase, non-receptor type 18	1856.13	-0.498425	0.707879	0.170232	-2.92792	0.00341233	0.0337079	2375.29	2396.48	1953.09	2447.34	1697.58	1576.64	1317.22	1320.98	1964.7	1511.94
516048	GIT2	GIT ArfGAP 2	374.201	-0.779502	0.582568	0.266395	-2.92612	0.00343219	0.0338061	512.848	632.682	488.537	500.401	231.91	382.53	257.217	199.442	240.953	295.485
515440	C2	complement C2	292.604	-0.670768	0.628172	0.229432	-2.92361	0.00346003	0.0338389	387.832	490.714	376.449	350.421	194.031	257.728	240.295	205.486	210.945	212.143
522824	CTU1	cytosolic thiouridylase subunit 1	60.3034	-0.948489	0.518175	0.324477	-2.92313	0.00346531	0.0338389	93.7616	104.933	95.1696	60.2724	44.0629	39.1392	54.1509	54.3932	34.4219	22.7296
540134	KLHL22	kelch like family member 22	1126.8	-0.77054	0.586198	0.263527	-2.92395	0.00345623	0.0338389	1554.17	1999.89	1377.84	1442.33	731.289	1009.5	702.608	609.55	723.743	1117.12
786335	GYS1	glycogen synthase 1	455.472	-0.806391	0.57181	0.276231	-2.91926	0.00350864	0.0341329	647.807	1010.75	487.48	403.685	349.411	262.897	307.983	401.474	338.924	344.312
282446	IDH3A	isocitrate dehydrogenase 3 (NAD(+)) alpha	1137.78	-0.599612	0.659931	0.205628	-2.916	0.0035455	0.0341329	1336.81	1901.13	1335.55	1471.77	811.684	975.525	877.922	908.281	830.539	928.547
513700	ITIH4	inter-alpha-trypsin inhibitor heavy chain family member 4	984.497	-0.696663	0.616998	0.238898	-2.91615	0.0035438	0.0341329	1466.09	1436.65	1386.3	1049.86	751.388	849.246	995.023	613.003	786.409	510.996
100139910	PRKAR2A	protein kinase cAMP-dependent type II regulatory subunit alpha	181.579	-0.754352	0.592812	0.258683	-2.91613	0.00354406	0.0341329	261.396	274.676	278.107	192.031	135.281	187.573	148.915	126.054	119.153	92.6022
505256	SNX20	sorting nexin 20	137.318	-0.805943	0.571988	0.276309	-2.91682	0.00353624	0.0341329	200.309	231.469	193.512	149.98	99.7212	130.71	103.564	56.9834	105.914	101.021
510616	HK3	hexokinase 3	7041.79	-0.681628	0.623462	0.234109	-2.91158	0.00359608	0.0345224	10722.9	11638.3	6826.84	8041.46	6147.16	4325.99	5113.2	3963.8	6789.06	6849.19
528523	ADGB	androglobin	170.654	0.934912	1.91177	0.321615	2.90693	0.00364994	0.034941	110.809	49.38	84.5952	126.152	212.584	237.05	234.88	154.546	233.893	262.653
534591	KCNN4	potassium calcium-activated channel subfamily N member 4	2345.51	-0.607773	0.656209	0.20924	-2.90467	0.00367641	0.0350958	3037.31	3776.03	2470.18	2963.16	1917.12	1516.83	1872.95	2193	2227.72	1480.79
507817	ME2	malic enzyme 2	3473.88	-0.637187	0.642965	0.219456	-2.90349	0.00369033	0.0351303	4874.18	4529.08	3060.23	5546.46	3136.19	3267.01	2767.11	1872.68	2571.05	3114.8
538960	CCDC13	coiled-coil domain containing 13	128.636	-0.903005	0.534772	0.311646	-2.89753	0.00376111	0.0356121	214.515	240.728	174.478	131.758	78.0763	103.386	101.533	113.103	72.3743	56.4031
537312	RAPGEF4	Rap guanine nucleotide exchange factor 4	79.9404	1.37454	2.59286	0.474394	2.89747	0.00376184	0.0356121	11.365	38.5782	23.2637	91.1095	57.9775	83.4477	108.302	46.6228	152.692	186.046
615289	ABHD14B	abhydrolase domain containing 14B	91.2251	-0.844269	0.556993	0.291955	-2.89178	0.00383069	0.0356325	133.539	177.46	121.606	74.2892	79.6224	64.9858	43.3207	75.1145	55.6047	86.7093
613695	C9H6orf203	chromosome 9 C6orf203 homolog	50.1835	1.0675	2.0958	0.369665	2.88775	0.00388008	0.0356325	25.5713	21.6038	16.919	29.4354	66.4808	73.8475	86.6415	58.7102	48.5437	74.0817
513078	CC2D1A	coiled-coil and C2 domain containing 1A	1184.37	-0.810655	0.570123	0.280409	-2.89097	0.00384055	0.0356325	1859.61	2334.75	1197.02	1400.28	752.934	720.751	683.656	774.456	957.636	1162.58
523460	CHST13	carbohydrate sulfotransferase 13	205.106	-0.890244	0.539523	0.307781	-2.89246	0.00382236	0.0356325	362.261	367.264	197.741	246.696	159.245	118.894	104.241	113.103	133.275	248.342
515997	E4F1	E4F transcription factor 1	939.857	-0.468369	0.722781	0.162086	-2.88963	0.00385699	0.0356325	1022.85	1152.72	1347.18	1105.93	827.918	790.907	830.54	748.554	898.501	673.47
517357	FBXW5	F-box and WD repeat domain containing 5	164.214	-0.762123	0.589628	0.263756	-2.8895	0.00385852	0.0356325	237.245	257.702	228.407	197.637	113.636	182.403	105.594	100.153	101.501	117.857
616139	FXYD1	FXYD domain containing ion transport regulator 1	552.049	-0.734879	0.600868	0.254366	-2.88907	0.00386387	0.0356325	751.513	1044.7	532.95	724.671	396.566	405.423	393.948	301.321	465.137	504.261
519028	IGF2BP2	insulin like growth factor 2 mRNA binding protein 2	13103.7	-0.914936	0.530367	0.316094	-2.8945	0.0037976	0.0356325	14875.4	27362.7	18749.5	17207.1	7431.16	10464.9	6871.08	6072.18	8002.66	14000.6
511749	LTC4S	leukotriene C4 synthase	34.5895	-0.858703	0.551448	0.296933	-2.8919	0.00382914	0.0356325	46.8808	60.1819	45.4699	43.4522	27.8292	22.1542	21.6604	20.7212	24.7132	32.8317
506358	MRPL20	mitochondrial ribosomal protein L20	62.9377	-0.882282	0.542509	0.305648	-2.88659	0.00389436	0.0356325	90.9203	92.5876	75.0783	110.733	40.1977	57.601	47.3821	28.4917	47.6611	38.7245
520388	PRMT1	protein arginine methyltransferase 1	513.249	-0.981295	0.506525	0.340101	-2.8853	0.00391037	0.0356325	862.323	791.624	640.809	773.73	339.361	511.763	300.538	480.042	300.971	131.327
326602	RPS18	ribosomal protein S18	239.733	-0.728788	0.603411	0.252393	-2.88751	0.00388304	0.0356325	356.578	391.954	210.431	318.182	219.541	204.558	157.038	110.513	201.236	227.296
507066	SRSF7	serine and arginine rich splicing factor 7	1413.44	-0.808135	0.57112	0.279387	-2.89253	0.00382153	0.0356325	1861.03	2107.91	1618.94	2394.08	1015.77	1131.34	913.12	662.216	792.587	1637.37
535982	TBX2	T-box 2	35.036	1.08841	2.12639	0.37715	2.88587	0.00390332	0.0356325	19.8888	18.5175	19.0339	12.6152	40.1977	26.5851	67.6887	41.4425	54.722	49.6684
613265	ZNF148	zinc finger protein 148	846.802	-0.639913	0.641752	0.221981	-2.88274	0.00394235	0.0358281	1072.58	1418.13	1063.79	885.864	718.92	777.614	511.049	495.583	727.274	797.22
282233	FLT3LG	fms related tyrosine kinase 3 ligand	478.658	-1.11823	0.460659	0.388448	-2.87872	0.00399299	0.0360957	708.895	706.752	878.733	779.336	204.081	554.595	209.835	164.043	206.532	373.776
614203	GALNT18	polypeptide N-acetylgalactosaminyltransferase 18	675.879	-0.638793	0.64225	0.22189	-2.87888	0.00399095	0.0360957	1078.26	1049.33	628.12	777.935	583.64	449.731	469.759	467.091	559.577	695.358
526631	ARHGEF37	Rho guanine nucleotide exchange factor 37	2380	-0.417402	0.748772	0.145159	-2.87547	0.00403424	0.0363192	2989.01	3164.95	2258.69	2862.24	2337.65	1959.17	2176.19	1885.63	2300.09	1866.35
507188	GLB1	galactosidase beta 1	296.447	-0.503437	0.705424	0.175103	-2.8751	0.00403902	0.0363192	372.205	455.222	328.864	315.379	269.015	237.05	259.248	274.556	237.423	215.51
538615	THAP1	THAP domain containing 1	716.283	-0.729113	0.603275	0.253677	-2.87418	0.00405079	0.0363292	1231.69	1089.45	657.728	950.342	540.35	708.936	442.007	406.654	511.033	624.644
506967	ATF1	activating transcription factor 1	1087.12	-0.971817	0.509863	0.338876	-2.86777	0.00413376	0.0363681	1723.22	2013.78	1447.64	1359.63	657.078	1312.27	587.538	802.084	597.529	370.409
507340	ATG13	autophagy related 13	449.163	-0.750357	0.594456	0.261721	-2.86702	0.0041436	0.0363681	737.307	663.544	513.916	534.042	369.51	443.823	243.002	247.791	263.901	474.797
539020	BCL6	B cell CLL/lymphoma 6	124.271	0.691784	1.61528	0.241356	2.86624	0.0041538	0.0363681	72.4521	81.7857	94.1122	72.8876	150.741	180.188	166.514	152.819	130.627	140.587
614893	CDCA7	cell division cycle associated 7	34.6219	1.24934	2.37733	0.435284	2.87018	0.00410235	0.0363681	12.7857	6.17251	19.0339	26.632	36.3325	29.539	83.2571	37.9889	40.6002	53.8776
784716	CDH23	cadherin related 23	99.8052	1.05376	2.07593	0.366915	2.87194	0.00407965	0.0363681	35.5158	46.2938	40.1827	57.469	142.238	95.2633	160.422	169.223	121.801	129.643
280748	CEL	carboxyl ester lipase	121.23	-1.02611	0.491032	0.358096	-2.86546	0.00416401	0.0363681	215.936	246.9	149.099	128.955	73.4381	132.925	69.7193	40.5791	69.7265	85.0256
537043	DRD3	dopamine receptor D3	159.14	-0.648107	0.638117	0.226165	-2.86564	0.00416173	0.0363681	237.245	228.383	142.754	196.236	167.748	104.863	102.21	104.47	132.392	175.102
280844	LPO	lactoperoxidase	109.902	-0.923403	0.527264	0.322186	-2.86606	0.00415619	0.0363681	153.428	189.805	82.4804	134.562	160.018	68.6782	111.009	102.743	61.7829	34.5154
508591	MIOX	myo-inositol oxygenase	475.299	-0.699602	0.615742	0.243834	-2.86918	0.00411543	0.0363681	617.974	864.151	474.791	661.595	325.447	343.391	395.302	410.971	368.932	290.434
505069	SLC13A2	solute carrier family 13 member 2	42.9777	0.976257	1.96735	0.340775	2.86482	0.00417251	0.0363681	22.7301	20.0606	27.4935	23.8286	48.7011	37.6622	79.8726	44.0326	53.8394	71.5562
536610	UNC80	unc-80 homolog, NALCN channel complex subunit	264.031	-0.61006	0.655169	0.21275	-2.86749	0.0041374	0.0363681	393.515	333.315	311.945	315.379	242.732	294.651	201.712	202.032	197.705	147.322
520456	BTBD8	BTB (POZ) domain containing 8	154.551	-0.821487	0.565858	0.287101	-2.86132	0.00421885	0.0363996	232.983	282.392	136.41	199.039	137.6	76.8014	139.439	70.7975	123.566	146.48
507984	ERCC3	ERCC excision repair 3, TFIIH core complex helicase subunit	3235.38	-0.646552	0.638805	0.225874	-2.86245	0.00420379	0.0363996	4322.98	4763.63	3980.21	4565.28	2111.93	2885.96	1876.33	2582.38	2829.66	2435.44
100124502	KCTD7	potassium channel tetramerization domain containing 7	373.636	-0.713734	0.60974	0.249279	-2.8632	0.00419388	0.0363996	467.387	689.777	523.433	384.061	258.193	291.698	322.198	300.458	290.38	208.776
521837	MPZL3	myelin protein zero like 3	258.817	0.953922	1.93713	0.333309	2.86197	0.0042101	0.0363996	142.063	115.734	129.008	149.98	341.68	217.85	439.976	406.654	427.185	218.036
509963	ANGPTL4	angiopoietin like 4	33.4724	-0.951214	0.517197	0.332686	-2.8592	0.00424713	0.036459	22.7301	55.5525	61.3315	40.6488	40.1977	27.3236	20.3066	28.4917	23.8306	14.3112
532085	TMOD2	tropomodulin 2	630.407	-0.576164	0.670745	0.201466	-2.85985	0.00423841	0.036459	882.211	893.47	693.681	801.763	504.79	642.473	525.941	388.523	486.32	484.899
532120	BBS4	Bardet-Biedl syndrome 4	210.4	-0.689587	0.620031	0.241597	-2.85429	0.00431337	0.0366089	306.856	347.203	238.982	250.901	156.926	220.066	147.561	135.551	133.275	166.684
526435	DLGAP1	DLG associated protein 1	367.522	-0.483992	0.714996	0.169502	-2.85538	0.00429851	0.0366089	413.403	509.232	492.767	361.634	367.191	378.099	305.276	283.19	300.089	264.337
511100	OIP5	Opa interacting protein 5	134.337	-0.54204	0.686799	0.189848	-2.85513	0.0043019	0.0366089	149.166	211.408	150.157	163.997	123.685	121.11	101.533	96.6991	109.444	116.174
506194	TACC3	transforming acidic coiled-coil containing protein 3	259.279	-0.613154	0.653766	0.214846	-2.85392	0.0043183	0.0366089	359.419	393.497	336.266	245.295	235.002	258.466	207.127	149.366	183.584	224.771
614554	TBC1D5	TBC1 domain family member 5	191.292	-0.686348	0.621425	0.240325	-2.85591	0.00429132	0.0366089	284.126	308.625	214.66	231.278	143.011	144.003	149.592	106.196	140.336	191.097
100138953	BBS7	Bardet-Biedl syndrome 7	112.657	-1.04639	0.484179	0.366887	-2.85207	0.00434357	0.0367317	181.841	223.753	114.204	159.792	80.3954	99.6941	50.0896	31.9452	65.3134	119.541
512977	RBBP8	RB binding protein 8, endonuclease	1120.1	-0.472391	0.720769	0.165685	-2.85114	0.00435627	0.0367479	1424.89	1611.02	1078.59	1174.61	1221.39	816.015	900.936	821.079	1144.75	1007.68
513967	ALDH3A2	aldehyde dehydrogenase 3 family member A2	99.1791	-0.801999	0.573554	0.282008	-2.84389	0.00445664	0.0373175	156.269	186.718	112.089	114.938	61.8426	79.7553	61.5967	69.0708	83.8483	65.6634
506821	IFFO1	intermediate filament family orphan 1	99.658	0.645942	1.56476	0.227026	2.84523	0.00443794	0.0373175	83.8172	66.3544	97.2845	68.6825	71.892	89.3555	144.854	104.47	156.223	113.648
404181	RPS6KB1	ribosomal protein S6 kinase B1	55.2958	0.971219	1.9605	0.341443	2.84445	0.00444876	0.0373175	24.1507	20.0606	27.4935	44.8539	68.0269	99.6941	73.7807	71.6609	61.7829	61.4542
282882	ITGA4	integrin subunit alpha 4	57.6273	0.835244	1.78416	0.293861	2.84231	0.00447874	0.0374106	19.8888	43.2075	43.3551	35.0421	63.3887	63.5088	87.3184	58.7102	77.67	84.1838
534082	ADAMTS3	ADAM metallopeptidase with thrombospondin type 1 motif 3	63.6173	-0.627491	0.647301	0.221071	-2.83841	0.0045339	0.0374418	76.714	91.0445	54.9869	86.9044	77.3033	53.9087	46.0283	57.8468	47.6611	43.7756
511036	ATG16L2	autophagy related 16 like 2	59.3745	-0.730705	0.602609	0.257381	-2.83901	0.00452543	0.0374418	71.0315	69.4407	91.9973	68.6825	69.573	59.8165	50.7665	46.6228	39.7176	26.097
506359	AURKAIP1	aurora kinase A interacting protein 1	37.7879	-1.27881	0.412137	0.450194	-2.84057	0.00450335	0.0374418	66.7696	87.9582	35.953	61.6741	16.2337	36.9237	18.2759	11.224	16.7697	26.097
282206	CRYBB3	crystallin beta B3	52.3223	-0.913883	0.530754	0.321758	-2.84029	0.00450731	0.0374418	61.0871	87.9582	80.3655	75.6909	37.8786	50.9548	39.9363	19.8578	28.2436	41.2501
538470	ENTHD1	ENTH domain containing 1	180.98	-0.657112	0.634147	0.23159	-2.83739	0.00454839	0.0374418	252.872	243.814	199.856	255.106	157.699	160.249	168.545	130.371	157.105	84.1838
520625	SLC44A4	solute carrier family 44 member 4	606.93	-0.52316	0.695846	0.18436	-2.83771	0.00454379	0.0374418	738.728	817.857	689.451	871.847	463.82	458.593	562.493	511.124	489.851	465.536
521797	DCST1	DC-STAMP domain containing 1	329.305	-0.848532	0.555349	0.299152	-2.83646	0.00456167	0.0374606	502.903	560.155	424.034	412.095	219.541	412.069	184.113	210.666	191.527	175.944
535831	ASB4	ankyrin repeat and SOCS box containing 4	2039.04	-0.911177	0.531751	0.321892	-2.83069	0.00464473	0.0380511	3577.15	4215.82	1838.89	2136.17	1545.29	1236.95	1935.9	978.215	2037.07	888.981
506656	C7H1orf35	chromosome 7 C1orf35 homolog	942.621	-0.707988	0.612173	0.250511	-2.82617	0.00471082	0.0383141	1289.93	1578.62	1245.66	1059.67	674.858	1077.43	638.304	689.844	565.755	606.123
505453	CREBBP	CREB binding protein	215.261	-0.843204	0.557404	0.29826	-2.82708	0.00469751	0.0383141	423.348	342.574	186.11	273.328	158.472	238.527	124.547	125.191	131.509	149.005
514810	KDELC1	KDEL motif containing 1	200.375	-0.680695	0.623865	0.240918	-2.82542	0.00472181	0.0383141	234.404	299.367	296.083	270.525	135.281	193.48	161.776	150.229	144.749	117.857
537453	PATL1	PAT1 homolog 1, processing body mRNA decay factor	262.242	-0.6044	0.657745	0.213909	-2.82549	0.00472077	0.0383141	282.705	461.395	292.911	332.199	214.903	188.311	225.403	176.13	213.592	234.873
617714	EFNB3	ephrin B3	52.5261	-0.993294	0.50233	0.352147	-2.82068	0.0047922	0.0387929	86.6584	118.821	42.2976	57.469	45.6089	56.1241	28.4292	28.4917	34.4219	26.9388
515556	ABR	ABR, RhoGEF and GTPase activating protein	80.4423	0.630693	1.54831	0.223842	2.81758	0.00483869	0.0388006	48.3014	57.0957	68.7336	58.8707	80.3954	73.8475	106.948	115.694	92.6744	101.862
508825	MRPL23	mitochondrial ribosomal protein L23	123.671	-0.896318	0.537256	0.317982	-2.81877	0.00482077	0.0388006	186.103	185.175	169.19	151.382	113.636	162.464	75.1344	44.0326	85.6135	63.9797
513315	PSMD9	proteasome 26S subunit, non-ATPase 9	198.717	-0.481724	0.716121	0.17094	-2.81808	0.00483113	0.0388006	228.721	263.875	207.258	264.918	194.804	189.05	138.085	184.764	164.166	151.531
512922	SPSB4	splA/ryanodine receptor domain and SOCS box containing 4	303.839	0.678169	1.60011	0.24052	2.8196	0.0048084	0.0388006	183.261	202.15	203.029	215.859	361.779	349.299	506.988	328.95	276.258	410.817
523714	ORC3	origin recognition complex subunit 3	101.976	1.31431	2.48683	0.466673	2.81634	0.00485748	0.0388599	31.2539	24.69	37.0104	75.6909	122.139	148.433	173.96	116.557	45.8959	244.133
508465	DERL2	derlin 2	644.42	-1.19809	0.435852	0.426167	-2.81131	0.004934	0.0393795	940.457	1194.38	1130.4	975.572	248.144	898.724	254.509	282.327	242.719	276.965
509031	SLC4A9	solute carrier family 4 member 9	42.1194	1.1179	2.17031	0.397997	2.80882	0.0049723	0.0395925	12.7857	10.8019	26.436	29.4354	51.0202	38.4007	62.2736	75.1145	45.8959	69.0307
790891	DNAH9	dynein axonemal heavy chain 9	186.545	0.577235	1.49199	0.205564	2.80805	0.00498427	0.0395953	136.381	112.648	136.41	154.185	206.4	207.511	278.877	184.764	227.714	220.562
532701	RSRC2	arginine and serine rich coiled-coil 2	716.387	-0.679939	0.624192	0.242492	-2.80396	0.00504793	0.0400077	850.958	1464.43	792.023	733.081	572.044	463.024	588.215	500.763	668.138	531.2
788087	MCL1	MCL1, BCL2 family apoptosis regulator	356.582	-0.681954	0.62332	0.243361	-2.80224	0.00507495	0.0401286	448.919	699.036	440.953	354.626	255.101	247.389	312.045	277.146	260.371	270.23
539785	SAFB	scaffold attachment factor B	83.6297	-0.745911	0.596291	0.26644	-2.79955	0.00511746	0.0403711	113.65	155.856	102.572	99.5196	54.1123	67.2012	62.2736	63.8905	59.1351	58.0868
505242	SLC9A3R1	SLC9A3 regulator 1	138.027	-1.02918	0.489988	0.367725	-2.79878	0.00512962	0.0403735	214.515	270.047	181.88	168.202	92.7639	165.418	76.4882	81.1582	94.4396	35.3572
508016	ITLN2	intelectin 2	102.258	-0.679459	0.624399	0.243546	-2.78986	0.00527313	0.0412112	144.904	149.683	120.548	117.741	98.1752	104.125	90.0259	56.12	87.3787	53.8776
618581	ITLN2	intelectin 2	102.258	-0.679459	0.624399	0.243546	-2.78986	0.00527313	0.0412112	144.904	149.683	120.548	117.741	98.1752	104.125	90.0259	56.12	87.3787	53.8776
528109	MPP5	membrane palmitoylated protein 5	26.1729	1.41441	2.66551	0.50711	2.78916	0.00528442	0.0412112	5.68252	16.9744	13.7467	4.20505	29.3752	22.1542	62.9505	42.3058	44.1307	20.2041
281419	PPIB	peptidylprolyl isomerase B	242.497	-0.476645	0.718647	0.170825	-2.79026	0.00526657	0.0412112	328.166	296.28	307.715	270.525	210.265	217.85	203.743	179.584	182.701	228.138
504785	RABEP1	rabaptin, RAB GTPase binding effector protein 1	2840.11	-0.538291	0.688586	0.192943	-2.7899	0.00527236	0.0412112	4044.53	4396.37	2782.13	3309.38	2289.72	2071.42	2302.09	2258.61	2263.9	2682.94
785402	RGL3	ral guanine nucleotide dissociation stimulator like 3	286.107	-0.661674	0.632144	0.23759	-2.78494	0.00535372	0.0416563	367.943	482.999	390.196	332.199	181.663	257.728	224.726	212.393	209.179	202.041
528454	CPA3	carboxypeptidase A3	46.4112	-0.694442	0.617948	0.249496	-2.78338	0.00537953	0.0417618	66.7696	66.3544	49.6997	60.2724	44.8359	27.3236	37.9057	37.1255	30.8915	42.9337
538465	TRIB3	tribbles pseudokinase 3	65.8329	0.744182	1.67502	0.267473	2.78227	0.00539796	0.0418096	42.6189	54.0094	37.0104	39.2471	71.892	81.9707	98.1486	59.5735	100.618	73.2399
504519	CAP1	cyclase associated actin cytoskeleton regulatory protein 1	199.188	-0.733182	0.601576	0.263805	-2.77926	0.00544835	0.0421043	267.078	348.747	190.339	271.927	166.975	146.218	136.731	212.393	158.87	92.6022
515563	ABHD10	abhydrolase domain containing 10	466.201	0.675782	1.59746	0.243694	2.77307	0.00555303	0.0427677	225.88	308.625	309.83	468.162	480.826	468.932	754.052	508.534	670.786	466.378
515218	PPP6R3	protein phosphatase 6 regulatory subunit 3	49.7889	0.749412	1.68111	0.270282	2.7727	0.00555929	0.0427677	35.5158	24.69	46.5274	32.2387	44.8359	53.1702	60.9198	88.0652	53.8394	58.0868
513994	LRRK1	leucine rich repeat kinase 1	382.078	0.832378	1.78062	0.300656	2.76854	0.0056308	0.0432202	244.348	175.916	193.512	235.483	521.797	337.483	597.014	417.878	501.324	596.021
617325	KSR2	kinase suppressor of ras 2	299.057	-0.594652	0.662204	0.214966	-2.76626	0.00567036	0.0434261	367.943	486.085	333.094	372.848	241.186	267.328	203.066	194.262	225.066	299.694
538525	YTHDF1	YTH N6-methyladenosine RNA binding protein 1	45.6438	-0.860435	0.550787	0.311132	-2.7655	0.00568357	0.0434296	75.2934	75.6132	59.2167	30.837	54.1123	45.047	38.5825	25.0382	29.1262	23.5715
509072	CARF	calcium responsive transcription factor	36.2108	0.744171	1.67501	0.269293	2.76342	0.00571987	0.0435119	26.992	24.69	28.5509	28.0337	27.0561	56.1241	42.6439	41.4425	33.5393	53.0358
523206	MOV10	Mov10 RISC complex RNA helicase	691.886	-1.22403	0.428084	0.442903	-2.76367	0.0057156	0.0435119	1103.83	1339.43	797.31	1229.28	375.694	798.291	150.269	184.764	284.202	655.792
525042	GPD1	glycerol-3-phosphate dehydrogenase 1	34.4371	0.988131	1.98361	0.358322	2.75766	0.00582164	0.0440892	15.6269	23.1469	38.0679	19.6236	18.5528	31.7544	54.1509	69.9342	42.3655	31.148
512401	METTL12	methyltransferase like 12(METTL12)	237.933	-0.965216	0.512202	0.349989	-2.75784	0.00581842	0.0440892	426.189	428.989	296.083	243.893	179.344	270.282	152.976	123.464	193.292	64.8215
338067	PRKCSH	protein kinase C substrate 80K-H	148.165	-0.784892	0.580395	0.284781	-2.75612	0.00584909	0.0441989	228.721	222.21	222.062	159.792	105.905	129.233	119.809	143.322	89.144	61.4542
526956	ACAD11	acyl-CoA dehydrogenase family member 11	970.789	-0.580258	0.668844	0.21085	-2.752	0.0059233	0.0445125	1301.3	1180.49	1190.68	1131.16	1014.22	918.663	679.594	517.167	656.664	1117.96
506459	ACSS2	acyl-CoA synthetase short chain family member 2	242.099	-0.800413	0.574185	0.290939	-2.75114	0.00593886	0.0445125	356.578	395.04	283.394	333.601	170.84	195.696	212.542	210.666	181.818	80.8164
508021	C3H1orf109	chromosome 3 C1orf109 homolog	719.372	-0.619345	0.650966	0.22516	-2.75069	0.00594693	0.0445125	995.862	1151.17	724.347	905.488	582.094	432.746	534.064	473.998	653.134	740.817
511144	DDRGK1	DDRGK domain containing 1	40.5466	-0.996753	0.501127	0.362424	-2.75024	0.00595521	0.0445125	76.714	70.9838	45.4699	53.264	24.737	40.6161	20.9835	18.9945	32.6567	21.0459
617777	SHE	Src homology 2 domain containing E	293.184	-0.6556	0.634812	0.238383	-2.7502	0.0059559	0.0445125	419.086	458.309	325.692	372.848	219.541	325.667	196.974	180.447	212.71	220.562
287012	COX5B	cytochrome c oxidase subunit Vb	47.191	0.925084	1.8988	0.337123	2.74406	0.0060685	0.0449902	29.8332	20.0606	30.6658	37.8455	43.2898	36.1853	83.934	89.792	57.3699	42.9337
513998	FBF1	Fas binding factor 1	89.578	-0.705466	0.613244	0.25714	-2.74351	0.00607857	0.0449902	127.857	154.313	95.1696	117.741	61.8426	67.9397	56.8585	77.7046	72.3743	63.9797
281386	SERPINF1	serpin family F member 1	54.3171	0.890519	1.85384	0.324435	2.74483	0.0060542	0.0449902	24.1507	33.9488	25.3786	35.0421	69.573	51.6932	77.842	65.6172	72.3743	87.5511
613948	SLC25A40	solute carrier family 25, member 40	891.64	-1.90869	0.266335	0.695808	-2.74312	0.00608582	0.0449902	2747.5	2529.18	614.373	641.971	508.656	323.452	893.49	252.972	307.15	97.6532
515890	URM1	ubiquitin related modifier 1	26.0175	1.33045	2.51481	0.484537	2.74581	0.0060361	0.0449902	5.68252	4.62938	13.7467	11.2135	36.3325	26.5851	46.7052	35.3988	34.4219	45.4592
515066	LRRC51	leucine-rich repeat-containing protein 51	24.5949	1.13057	2.18946	0.41239	2.74151	0.00611573	0.045016	14.2063	10.8019	7.40208	14.0168	29.3752	36.9237	45.3514	19.8578	32.6567	35.3572
510678	POLE3	DNA polymerase epsilon 3, accessory subunit	50.998	1.11184	2.16121	0.405541	2.74161	0.00611385	0.045016	18.4682	12.345	49.6997	25.2303	53.3393	42.8315	105.594	74.2511	78.5526	49.6684
540335	GLO1	glyoxalase I	245.42	-0.517698	0.698486	0.189011	-2.73898	0.00616308	0.0452668	301.174	373.437	285.509	295.755	191.712	195.696	217.958	200.305	208.297	184.362
282187	COL1A1	collagen type I alpha 1 chain	212.488	-0.730181	0.602828	0.26701	-2.73466	0.00624455	0.0455462	312.539	296.28	261.188	325.191	132.189	229.666	128.608	134.688	141.218	163.317
281128	DSC2	desmocollin 2	731.05	-0.414105	0.750485	0.151501	-2.73334	0.00626947	0.0455462	835.331	1053.96	817.401	814.378	657.851	608.503	605.137	599.189	610.769	707.986
539646	GAPVD1	GTPase activating protein and VPS9 domains 1	142.647	-0.921171	0.52808	0.336841	-2.73474	0.00624297	0.0455462	248.61	169.744	224.177	204.646	87.3527	162.464	90.7028	50.9397	75.0222	112.806
510440	IVD	isovaleryl-CoA dehydrogenase	316.746	-0.558703	0.678912	0.204395	-2.73344	0.0062676	0.0455462	409.142	503.059	344.726	398.078	234.229	237.789	274.139	234.841	278.906	252.551
539602	NGDN	neuroguidin	7826.41	-0.671539	0.627836	0.245687	-2.73332	0.00627003	0.0455462	9357.69	10301.9	10763.7	11784	5871.96	4272.82	5424.57	8960.21	6851.73	4675.57
280880	NPB	neuropeptide B	71.6325	0.756827	1.68977	0.277092	2.73132	0.00630804	0.0455462	61.0871	35.4919	50.7571	47.6573	69.573	55.3856	81.2264	121.737	86.4961	106.913
444879	ST3GAL2	ST3 beta-galactoside alpha-2,3-sialyltransferase 2	39.938	0.98202	1.97523	0.35946	2.73193	0.00629642	0.0455462	15.6269	16.9744	37.0104	18.2219	44.0629	42.8315	68.3656	56.12	36.1872	63.9797
506434	TNNI2	troponin I2, fast skeletal type	79.129	-0.599206	0.660117	0.219326	-2.73203	0.00629457	0.0455462	105.127	115.734	77.1932	96.7162	82.7145	49.4778	60.2429	66.4806	81.2004	56.4031
523327	RSPH9	radial spoke head 9 homolog	575.527	-0.567449	0.674809	0.207941	-2.7289	0.00635456	0.0457851	772.823	898.1	753.955	592.912	420.53	522.102	408.163	423.058	467.785	495.842
281614	ALCAM	activated leukocyte cell adhesion molecule	236.338	1.02055	2.02869	0.374744	2.72332	0.00646304	0.0463706	116.492	83.3288	113.146	100.921	363.325	231.143	449.453	258.152	310.68	336.735
497204	UBA7	ubiquitin like modifier activating enzyme 7	108.029	0.63374	1.55158	0.23267	2.72377	0.00645415	0.0463706	82.3966	55.5525	84.5952	98.1179	101.267	95.2633	164.483	115.694	128.862	154.056
509914	PFDN6	prefoldin subunit 6	32.3325	-1.05075	0.482718	0.386166	-2.72097	0.00650902	0.0466024	59.6665	49.38	51.8146	32.2387	25.5101	36.1853	14.2146	26.7649	13.2392	14.3112
537067	CALHM2	calcium homeostasis modulator family member 2	39.4155	1.06177	2.08749	0.390427	2.7195	0.00653799	0.046614	18.4682	23.1469	13.7467	21.0253	49.4741	31.7544	52.1203	69.0708	73.2569	42.0919
517332	GRAMD1B	GRAM domain containing 1B	65.4257	1.03345	2.04691	0.379925	2.72013	0.00652563	0.046614	19.8888	33.9488	26.436	39.2471	92.7639	64.9858	107.625	107.06	87.3787	74.9236
516747	ARMCX3	armadillo repeat containing X-linked 3	290.591	-0.750674	0.594326	0.276389	-2.71601	0.00660746	0.046913	424.768	549.353	300.313	354.626	195.577	205.296	257.217	138.142	217.123	263.495
534482	FSTL1	follistatin like 1	209.062	0.895612	1.8604	0.329678	2.71663	0.00659511	0.046913	120.754	81.7857	129.008	152.784	244.278	133.664	347.243	347.081	334.511	199.516
281879	ITPR3	inositol 1,4,5-trisphosphate receptor type 3	238.714	-0.936493	0.522501	0.34496	-2.71479	0.00663178	0.0469878	369.364	354.919	384.908	339.208	120.593	291.698	124.547	131.234	100.618	170.051
100141021	CYFIP1	cytoplasmic FMR1 interacting protein 1	870.818	-0.353403	0.782736	0.13033	-2.7116	0.00669584	0.0473432	1002.96	1044.7	940.065	1089.11	810.911	770.968	791.957	669.123	816.418	771.965
519461	SLC22A1	solute carrier family 22 member 1	87.7631	0.776891	1.71343	0.286643	2.71031	0.00672199	0.0474297	49.7221	54.0094	42.2976	63.0758	112.09	109.294	127.255	88.0652	97.9701	133.852
522049	CDC20B	cell division cycle 20B	26.0999	0.84508	1.79636	0.312484	2.70439	0.00684291	0.0481832	12.7857	15.4313	22.2062	16.8202	24.737	34.7083	41.2901	31.9452	28.2436	32.8317
529689	ATP11C	ATPase phospholipid transporting 11C	787.161	-0.929775	0.52494	0.344053	-2.70242	0.00688377	0.0482547	1145.03	1362.58	1181.16	1041.45	432.898	954.848	437.269	495.583	255.075	565.715
533203	MMP19	matrix metallopeptidase 19	92.0854	0.865855	1.82242	0.320306	2.70321	0.00686724	0.0482547	46.8808	37.035	66.6187	50.4606	122.139	104.863	146.884	148.502	101.501	95.9695
526835	NEURL2	neuralized E3 ubiquitin protein ligase 2	1214.48	-1.15236	0.449887	0.42651	-2.70185	0.00689556	0.0482547	1926.37	2073.96	2232.26	1641.37	503.244	1639.41	611.229	670.85	565.755	280.332
511970	QRICH1	glutamine rich 1	371.609	-0.680678	0.623872	0.252147	-2.69953	0.00694383	0.048493	599.506	418.187	576.305	449.941	245.824	389.915	275.493	242.611	231.245	287.067
517656	NFS1	NFS1, cysteine desulfurase	24.0993	0.922903	1.89593	0.342052	2.69814	0.00697283	0.0484967	15.6269	18.5175	11.6318	15.4185	21.6449	25.8466	36.5519	20.7212	38.835	36.199
280958	VWF	von Willebrand factor	137.079	0.761235	1.69494	0.282062	2.69882	0.00695865	0.0484967	80.9759	55.5525	112.089	96.7162	160.018	121.848	142.823	202.895	211.827	186.046
506018	EXOSC1	exosome component 1	204.952	-0.530474	0.692327	0.196787	-2.69568	0.00702449	0.0487049	286.967	231.469	278.107	248.098	167.748	186.096	154.33	135.551	164.166	196.99
510029	PSMC4	proteasome 26S subunit, ATPase 4	33.9381	-0.876549	0.544669	0.325207	-2.69536	0.00703134	0.0487049	46.8808	58.6388	42.2976	39.2471	33.2404	31.0159	20.3066	23.3114	32.6567	11.7857
517133	KIAA0100	KIAA0100	543.654	-0.766101	0.588004	0.284644	-2.69144	0.00711452	0.0491811	698.95	831.745	949.582	595.716	348.638	645.427	357.396	350.534	351.28	307.271
614538	DAD1	defender against cell death 1	242.405	-0.756888	0.591771	0.281302	-2.69066	0.00713114	0.0491962	348.054	452.136	265.418	318.182	140.692	174.28	155.007	138.142	206.532	225.613
540568	ATP2A2	ATPase sarcoplasmic/endoplasmic reticulum Ca2+ transporting 2	1057.51	-0.496541	0.708804	0.184802	-2.68687	0.0072124	0.0492725	1135.08	1638.8	1090.22	1431.12	895.945	908.324	859.646	947.996	935.57	732.399
507837	BAIAP2	BAI1 associated protein 2	921.684	-0.533695	0.690783	0.198626	-2.68693	0.0072111	0.0492725	1173.44	1506.09	1114.54	909.693	749.842	852.2	789.927	752.008	752.869	616.225
513083	C10H14orf166	chromosome 10 open reading frame, human C14orf166(C10H14orf166)	40.0923	-0.787884	0.579193	0.293199	-2.6872	0.00720541	0.0492725	63.9284	61.7251	38.0679	58.8707	32.4674	30.2775	25.7217	37.1255	30.0089	22.7296
540647	GPR19	G protein-coupled receptor 19	465.794	-0.452174	0.73094	0.168296	-2.68678	0.00721448	0.0492725	457.443	516.947	615.43	529.837	569.725	302.775	410.87	483.495	425.42	345.995
789234	NKPD1	NTPase KAP family P-loop domain containing 1	24.4974	0.923051	1.89612	0.343433	2.68772	0.00719427	0.0492725	24.1507	15.4313	9.51696	15.4185	20.0989	25.1081	35.875	25.9015	41.4828	31.9898
540303	ENO3	enolase 3	116.889	-0.772511	0.585398	0.28775	-2.68466	0.00726027	0.0493872	167.634	211.408	137.467	141.57	81.1684	109.294	113.717	63.8905	82.9657	59.7705
528870	NAV3	neuron navigator 3	24.8738	1.50591	2.84003	0.560805	2.68526	0.00724728	0.0493872	11.365	3.08625	5.2872	8.4101	34.7865	22.1542	49.4127	56.12	37.0698	21.0459
508904	DPH5	diphthamide biosynthesis 5	76.7756	0.596252	1.51178	0.222191	2.68351	0.00728543	0.0494597	62.5077	44.7507	57.1018	51.8623	86.5797	90.8324	89.349	101.016	96.2049	87.5511
508607	UIMC1	ubiquitin interaction motif containing 1	144.659	-0.798023	0.575137	0.297735	-2.68031	0.00735541	0.0498354	170.476	259.245	175.535	214.458	100.494	150.649	132.67	81.1582	97.0875	64.8215
527574	SALL2	spalt like transcription factor 2	58057.3	-0.778328	0.583042	0.290736	-2.67709	0.00742641	0.0502167	71793	102903	49204.8	102937	39908.6	52642.2	34603.1	26972.1	46992.1	52616.5
534394	FAM192A	family with sequence similarity 192 member A	307.318	-0.769404	0.58666	0.287499	-2.67619	0.00744638	0.050252	376.467	620.337	376.449	363.036	202.535	293.175	278.2	211.529	209.179	142.271
535465	IFI27L2	interferon, alpha-inducible protein 27-like 2	44.9003	-1.01071	0.496302	0.378107	-2.67307	0.00751601	0.0506084	93.7616	66.3544	60.2741	37.8455	42.5168	52.4317	23.0141	18.9945	16.7697	37.0409
509599	NUFIP1	nuclear FMR1 interacting protein 1	124.645	0.700878	1.62549	0.262321	2.67184	0.00754373	0.0506084	96.6029	58.6388	115.261	109.331	94.31	194.219	167.868	87.2018	140.336	182.679
282318	PPP1CC	protein phosphatase 1 catalytic subunit gamma	123.199	0.842964	1.79373	0.315439	2.67236	0.00753205	0.0506084	66.7696	47.8369	114.204	68.6825	140.692	102.648	222.696	164.906	174.757	128.801
524184	ECD	ecdysoneless cell cycle regulator	508.163	1.0221	2.03087	0.38291	2.66928	0.00760134	0.0508342	198.888	168.201	208.316	309.772	788.493	579.703	870.476	457.594	656.664	843.522
507689	EIF2AK1	eukaryotic translation initiation factor 2 alpha kinase 1	28.4953	-1.03308	0.488667	0.387062	-2.66902	0.00760723	0.0508342	49.7221	37.035	43.3551	42.0505	20.0989	10.3386	33.1674	13.8142	18.5349	16.8368
535628	ZNF750	zinc finger protein 750	51.4743	1.10278	2.14768	0.413739	2.6654	0.00768965	0.0512844	17.0476	16.9744	26.436	33.6404	67.2539	36.1853	94.7641	62.1637	61.7829	98.495
280994	ALPL	alkaline phosphatase, liver/bone/kidney	183.45	-0.627521	0.647288	0.235729	-2.66204	0.00776676	0.0516946	251.452	299.367	193.512	243.893	127.55	119.633	157.715	157.999	157.105	126.276
514986	MKRN1	makorin ring finger protein 1	45.4145	0.95524	1.9389	0.358923	2.66141	0.0077815	0.0516946	18.4682	15.4313	37.0104	29.4354	51.7932	33.2314	73.7807	67.344	66.196	61.4542
511816	SNAPIN	SNAP associated protein	71.6176	-0.889603	0.539763	0.334389	-2.66038	0.00780523	0.0517514	93.7616	123.45	81.4229	114.938	52.5662	58.3395	43.9976	21.5846	51.1916	74.9236
534928	PFKFB4	6-phosphofructo-2-kinase/fructose-2,6-biphosphatase 4	635.786	-0.456622	0.72869	0.171838	-2.65728	0.00787747	0.052129	758.617	871.866	742.323	741.491	565.86	646.904	514.434	410.108	566.638	539.618
540819	FOSB	FosB proto-oncogene, AP-1 transcription factor subunit	195.63	-0.649784	0.637376	0.244894	-2.65333	0.0079702	0.0526404	264.237	273.133	280.222	239.688	139.146	172.803	177.344	183.901	113.857	111.964
533481	TAT	tyrosine aminotransferase	120.206	-0.729005	0.60332	0.274928	-2.65162	0.00801065	0.0528052	186.103	172.83	102.572	189.227	100.494	109.294	85.9646	101.879	101.501	52.1939
281181	GAPDH	glyceraldehyde-3-phosphate dehydrogenase	63.6463	0.714961	1.64144	0.269848	2.6495	0.00806113	0.0530354	35.5158	33.9488	58.1592	54.6657	57.2044	64.9858	102.21	56.12	96.2049	77.4491
534714	ZBTB40	zinc finger and BTB domain containing 40	216.636	-0.700693	0.615276	0.264761	-2.64651	0.00813274	0.0534034	379.308	305.539	262.245	255.106	140.692	223.019	143.5	128.644	145.631	182.679
505723	LARP4B	La ribonucleoprotein domain family member 4B	869.892	-0.500723	0.706752	0.189362	-2.64426	0.008187	0.0534507	1085.36	1243.76	903.054	1142.37	724.332	590.78	717.5	621.637	872.905	797.22
617951	NRSN2	neurensin 2	1197.97	-0.435385	0.739497	0.164585	-2.64535	0.00816053	0.0534507	1372.33	1643.43	1328.15	1452.14	1093.07	1013.93	1055.94	1193.2	1054.72	772.807
539051	TUB	tubby bipartite transcription factor	25.2731	-1.03089	0.489409	0.389854	-2.6443	0.00818607	0.0534507	22.7301	50.9232	40.1827	29.4354	26.2831	11.8156	11.5071	25.0382	24.7132	10.1021
515944	MFSD8	major facilitator superfamily domain containing 8	43.7157	-0.704665	0.613585	0.26663	-2.64286	0.00822088	0.0534671	61.0871	72.5269	53.9295	49.0589	35.5595	33.2314	32.4906	26.7649	38.835	33.6735
511983	SCRN3	secernin 3	78.0642	0.812995	1.75685	0.307594	2.64308	0.00821553	0.0534671	51.1427	33.9488	38.0679	60.2724	97.4021	76.8014	102.21	86.3385	136.805	97.6532
NA	LRRC16A	NA	393.389	-0.552207	0.681976	0.209048	-2.64153	0.00825324	0.0535753	549.784	506.145	411.344	506.008	367.191	400.992	270.755	224.48	294.793	402.398
534489	POC1A	POC1 centriolar protein A	87.909	-0.707214	0.612502	0.268377	-2.63515	0.00840999	0.0544891	140.642	140.424	107.859	89.7078	68.0269	91.5709	56.8585	56.12	52.9568	74.9236
504634	MORC2	MORC family CW-type zinc finger 2	53.653	-0.970385	0.51037	0.368589	-2.63271	0.00847078	0.0547134	52.5633	92.5876	115.261	57.469	37.8786	56.8626	36.5519	19.8578	39.7176	27.7806
407224	SLC22A7	solute carrier family 22 member 7	160.26	-0.711801	0.610557	0.270393	-2.63247	0.00847672	0.0547134	220.198	263.875	155.444	225.671	131.416	180.926	91.3797	88.9286	141.218	103.546
510316	DCAF8	DDB1 and CUL4 associated factor 8	40.3326	-1.11595	0.461388	0.424162	-2.63095	0.00851467	0.0548544	58.2458	84.8719	66.6187	42.0505	24.737	28.8005	24.3679	44.0326	21.1827	8.41838
513140	ADAMTS10	ADAM metallopeptidase with thrombospondin type 1 motif 10	26.0916	-1.03667	0.487452	0.394835	-2.62557	0.00865031	0.0554812	48.3014	43.2075	22.2062	44.8539	17.7798	17.7234	16.9222	25.9015	9.70875	14.3112
507518	EXOC6	exocyst complex component 6	42.4981	0.957329	1.94171	0.364619	2.62556	0.00865063	0.0554812	21.3095	21.6038	25.3786	18.2219	55.6584	40.6161	77.1651	42.3058	68.8439	53.8776
616120	PGLS	6-phosphogluconolactonase	267.387	-0.578635	0.669597	0.220419	-2.62516	0.00866079	0.0554812	359.419	416.644	370.104	262.115	194.804	214.896	209.835	245.201	221.536	179.311
534612	ARID4B	AT-rich interaction domain 4B	111.9	0.568051	1.48252	0.216572	2.62292	0.00871796	0.0557426	63.9284	97.217	116.318	72.8876	98.9482	118.156	157.715	152.819	114.74	126.276
510679	ALAD	aminolevulinate dehydratase	66.3571	1.06582	2.09335	0.406557	2.62157	0.00875265	0.0557631	22.7301	21.6038	47.5848	49.0589	71.892	64.9858	158.391	86.3385	99.7353	41.2501
534707	CNOT6	CCR4-NOT transcription complex subunit 6	687.231	-0.663351	0.63141	0.253164	-2.62025	0.00878661	0.0557631	923.41	1036.98	782.506	1009.21	462.274	722.967	435.238	405.791	445.72	648.215
514588	FBLN1	fibulin 1	3940.51	-0.524977	0.69497	0.200332	-2.62053	0.00877935	0.0557631	4720.75	5620.07	4624.19	5452.55	2833.17	3957.49	2879.48	2780.1	3345.11	3192.25
533184	TTYH2	tweety family member 2	99.8617	-1.08469	0.471495	0.413947	-2.62035	0.00878401	0.0557631	119.333	212.951	235.809	68.6825	42.5168	63.5088	87.9953	69.9342	41.4828	56.4031
516934	RPUSD4	RNA pseudouridine synthase D4	67.9578	-0.745551	0.59644	0.284654	-2.61914	0.0088151	0.0558399	82.3966	124.993	87.7676	89.7078	42.5168	58.3395	52.7972	46.6228	39.7176	54.7195
787548	MZT2B	mitotic spindle organizing protein 2B	364.24	-0.945067	0.519405	0.361135	-2.61693	0.00887236	0.0560983	544.101	850.263	388.081	396.677	219.541	464.501	185.467	165.77	189.762	238.24
517320	ZSWIM2	zinc finger SWIM-type containing 2	55.1266	0.926084	1.90011	0.35397	2.61628	0.00888946	0.0561024	29.8332	21.6038	30.6658	32.2387	73.4381	101.171	83.934	47.4862	63.5482	67.347
509157	NHEJ1	non-homologous end joining factor 1	430.19	-0.619976	0.650682	0.237091	-2.61493	0.00892454	0.0562197	568.252	635.768	469.504	459.752	473.869	355.945	402.071	183.901	460.724	292.118
281363	NT5E	5'-nucleotidase ecto	171.161	-0.595776	0.661689	0.227943	-2.6137	0.00895666	0.0563179	208.833	260.788	144.869	253.705	163.883	141.787	160.422	129.508	152.692	95.1277
518402	KIFAP3	kinesin associated protein 3	365.266	-0.486779	0.713617	0.186507	-2.60998	0.00905476	0.0567254	471.649	533.922	432.493	377.053	318.49	309.421	320.844	359.168	293.91	235.715
535113	SNRNP70	small nuclear ribonucleoprotein U1 subunit 70	362.898	-1.18396	0.440143	0.45355	-2.61042	0.00904319	0.0567254	548.363	788.538	615.43	417.702	150.741	536.133	161.776	170.95	133.275	106.072
535072	ANAPC7	anaphase promoting complex subunit 7	30.8373	-0.873026	0.546	0.334772	-2.60782	0.00911202	0.0567593	41.1983	63.2682	44.4125	28.0337	23.191	18.4619	18.9528	22.448	27.361	21.0459
535498	BAZ2B	bromodomain adjacent to zinc finger domain 2B	415.579	0.618394	1.53517	0.237223	2.60681	0.00913899	0.0567593	281.285	263.875	253.786	301.362	535.712	367.76	561.139	526.665	567.521	496.684
526848	CTNNA1	catenin alpha 1	304.432	-0.529905	0.6926	0.203339	-2.60602	0.0091601	0.0567593	446.078	435.162	297.141	353.224	269.015	213.419	259.925	195.125	278.906	296.327
505554	NEU1	neuraminidase 1	71.0711	-0.693079	0.618532	0.265709	-2.60841	0.00909637	0.0567593	89.4997	103.389	78.2506	114.938	54.8853	63.5088	67.0118	46.6228	54.722	37.8827
516993	NYNRIN	NYN domain and retroviral integrase containing	225.947	0.714147	1.64051	0.273984	2.60653	0.00914646	0.0567593	132.119	112.648	144.869	183.621	279.838	204.558	383.118	226.207	306.267	286.225
281426	PRND	prion like protein doppel	302.958	-0.655993	0.634639	0.251532	-2.60799	0.00910749	0.0567593	446.078	512.318	301.371	337.806	257.42	244.435	215.927	159.726	212.71	341.786
613382	HDDC3	HD domain containing 3	53.8848	0.923723	1.897	0.354712	2.60415	0.00921024	0.0569664	15.6269	33.9488	26.436	49.0589	59.5235	70.1551	50.7665	68.2074	57.3699	107.755
517263	AMBRA1	autophagy and beclin 1 regulator 1	412.802	-0.636678	0.643192	0.244836	-2.60042	0.00931084	0.0574843	609.45	694.407	482.193	438.727	289.114	334.529	291.061	421.332	323.919	243.291
399680	SLC5A2	solute carrier family 5 member 2	49.3445	-0.834622	0.56073	0.321112	-2.59916	0.0093452	0.0575921	66.7696	60.1819	81.4229	74.2892	34.0134	41.3546	25.7217	30.2185	25.5958	53.8776
281975	PDE6C	phosphodiesterase 6C	31.807	0.847799	1.79975	0.326354	2.59779	0.00938247	0.0577175	14.2063	24.69	21.1488	18.2219	34.0134	36.9237	51.4434	27.6283	48.5437	41.2501
532835	AZIN1	antizyme inhibitor 1	41.6406	0.881594	1.84241	0.339734	2.59495	0.00946033	0.0579871	17.0476	18.5175	26.436	29.4354	52.5662	44.3085	52.1203	75.1145	51.1916	49.6684
574092	SPINK1	serine peptidase inhibitor, Kazal type 1	225.245	-0.731468	0.602291	0.281834	-2.59539	0.0094484	0.0579871	346.634	253.073	377.506	236.885	192.485	281.359	169.899	152.819	131.509	110.281
618375	FANCA	FA complementation group A	390.482	-0.394546	0.760729	0.152207	-2.59217	0.00953724	0.0582489	514.268	499.973	373.276	426.112	406.615	374.407	357.396	282.327	335.393	335.051
521541	IQSEC1	IQ motif and Sec7 domain 1	73.8238	-0.848368	0.555413	0.327266	-2.59229	0.00953405	0.0582489	117.912	128.079	84.5952	99.5196	45.6089	65.7243	34.5212	37.1255	48.5437	76.6072
509960	MTF1	metal regulatory transcription factor 1	173.944	-0.484656	0.714667	0.187066	-2.59084	0.00957433	0.0583709	197.468	212.951	201.971	252.303	151.514	172.065	127.255	126.918	142.101	154.898
510512	ZNF438	zinc finger protein 438	28.813	0.873994	1.83273	0.337531	2.58937	0.00961511	0.0585148	17.0476	10.8019	23.2637	16.8202	31.6943	42.0931	33.8443	31.0818	32.6567	48.8266
507213	PSMA6	proteasome subunit alpha 6	46.924	-0.748959	0.595033	0.289421	-2.58778	0.00965959	0.0585815	80.9759	72.5269	59.2167	47.6573	34.7865	29.539	32.4906	29.3551	40.6002	42.0919
493777	SMCP	sperm mitochondria associated cysteine rich protein	151.451	-0.785878	0.579999	0.303691	-2.58775	0.00966045	0.0585815	231.563	259.245	181.88	203.244	84.2606	160.988	103.564	109.65	108.561	71.5562
511252	TMEM248	transmembrane protein 248	69.6114	-0.75661	0.591885	0.292514	-2.58658	0.0096935	0.0586775	129.277	63.2682	99.3994	77.0926	68.7999	83.4477	44.6745	44.896	41.4828	43.7756
NA	FAM109B	NA	12572.4	-0.634357	0.644228	0.245541	-2.58351	0.00978006	0.0588791	17877.2	20546.7	13767.9	14100.9	10172.3	5953.58	9320.05	9271.02	10962.9	13751.4
767972	MGC134040	uncharacterized protein MGC134040	87.5416	-0.735194	0.600737	0.2847	-2.58234	0.00981318	0.0588791	147.746	146.597	105.744	85.5027	62.6157	51.6932	73.7807	88.9286	54.722	58.0868
100139295	MSH5	mutS homolog 5	227.776	-0.590465	0.664129	0.22859	-2.58307	0.00979263	0.0588791	241.507	358.005	305.6	287.345	177.798	250.343	145.531	169.223	177.405	165
523809	UBASH3B	ubiquitin associated and SH3 domain containing B	52.1873	0.819291	1.76454	0.317248	2.58249	0.00980896	0.0588791	45.4602	29.3194	17.9765	37.8455	57.2044	47.2624	77.842	59.5735	81.2004	68.1889
514021	ZNF599	zinc finger protein 599	260.764	-0.763722	0.588975	0.295622	-2.58344	0.00978205	0.0588791	384.991	410.472	335.209	371.446	140.692	299.082	176.667	170.95	143.866	174.26
530147	BAMBI	BMP and activin membrane bound inhibitor	119.487	0.792851	1.73249	0.307326	2.57984	0.00988459	0.058996	68.1903	55.5525	90.9399	96.7162	124.458	223.019	204.42	91.5188	112.092	127.959
768050	SMAD5	SMAD family member 5	1853.68	-0.537179	0.689117	0.208214	-2.57993	0.0098819	0.058996	2329.83	2604.8	1976.36	2649.18	1416.2	1473.26	1376.11	1194.92	1526.92	1989.26
540108	SPTAN1	spectrin alpha, non-erythrocytic 1	1872.33	-0.542785	0.686444	0.210316	-2.58081	0.00985684	0.058996	2540.09	3271.43	1832.54	1726.87	1733.14	1379.47	1457.34	1326.16	1797.88	1658.42
281985	PLCB4	phospholipase C beta 4	124.083	0.498978	1.41321	0.193484	2.57891	0.00991112	0.0590509	92.341	97.217	84.5952	119.143	119.82	130.71	124.547	164.043	134.157	174.26
613596	ACTR6	ARP6 actin related protein 6 homolog	2834.73	-0.626585	0.647708	0.243039	-2.57812	0.00993386	0.0590831	4669.61	2859.41	2418.37	4409.7	2847.85	2592.79	1595.42	1706.91	2315.98	2931.28
503555	FCAR	Fc fragment of IgA receptor	55.2327	-0.912046	0.531431	0.353982	-2.57653	0.00997979	0.0591446	92.341	121.907	61.3315	50.4606	35.5595	26.5851	35.875	30.2185	45.0133	53.0358
509974	GPR114	NA	610.832	-0.536139	0.689614	0.208221	-2.57486	0.0100281	0.0591446	670.537	938.221	821.631	720.466	466.139	577.487	464.344	378.162	557.812	513.521
512745	RPL11	ribosomal protein L11	89.1947	-0.661125	0.632385	0.256676	-2.57572	0.0100031	0.0591446	126.436	149.683	104.687	106.528	61.0696	82.7092	71.75	69.9342	64.4308	54.7195
767925	RPL13A	ribosomal protein L13a	409.305	-0.816387	0.567862	0.316937	-2.57587	0.00999895	0.0591446	579.617	601.819	518.146	710.654	201.762	483.701	218.634	264.196	258.606	255.919
282866	SPON1	spondin 1	43.0591	-0.853758	0.553341	0.33159	-2.57474	0.0100314	0.0591446	49.7221	63.2682	89.8824	42.0505	32.4674	42.8315	22.3373	32.8086	29.1262	26.097
664648	TAS2R4	taste 2 receptor member 4	117.252	-0.549925	0.683056	0.213633	-2.57416	0.0100483	0.0591446	181.841	158.942	119.491	134.562	103.586	80.4938	102.21	78.568	105.914	106.913
506562	BZW1	basic leucine zipper and W2 domains 1	26.792	1.34956	2.54834	0.524412	2.57347	0.0100684	0.0591606	15.6269	7.71563	7.40208	8.4101	34.7865	18.4619	37.9057	42.3058	22.0653	73.2399
518225	CNOT6L	CCR4-NOT transcription complex subunit 6 like	231.033	-0.866054	0.548645	0.336732	-2.57194	0.0101131	0.0593102	377.888	412.015	281.279	278.935	143.011	283.574	116.425	101.016	120.035	196.148
506776	LZTR1	leucine zipper like transcription regulator 1	42.3361	-1.06659	0.477447	0.414884	-2.57081	0.0101461	0.0593102	66.7696	78.6994	56.0443	57.469	28.6022	54.6471	29.1061	18.1311	22.948	10.9439
100125264	NUP210	nucleoporin 210	47.5088	-0.818318	0.567103	0.318276	-2.5711	0.0101376	0.0593102	82.3966	78.6994	60.2741	44.8539	37.8786	47.2624	25.7217	40.5791	22.0653	35.3572
615376	EPDR1	ependymin related 1	30.0756	1.13083	2.18985	0.440055	2.56975	0.0101773	0.0593908	9.94441	15.4313	14.8042	11.2135	40.9707	27.3236	67.0118	44.0326	39.7176	30.3062
281915	MMP14	matrix metallopeptidase 14	353.273	-0.566544	0.675233	0.220635	-2.56779	0.0102349	0.0595233	443.237	439.791	545.639	428.915	252.009	237.789	276.17	349.671	321.271	238.24
507833	TRMT112	tRNA methyltransferase subunit 11-2	469.224	-0.874069	0.545606	0.340387	-2.56787	0.0102326	0.0595233	407.721	873.409	720.117	670.005	365.645	598.903	301.891	155.409	249.78	349.363
281983	PLAUR	plasminogen activator, urokinase receptor	32.5887	-0.87065	0.5469	0.339404	-2.56523	0.0103107	0.0597602	68.1903	41.6644	42.2976	37.8455	21.6449	21.4158	26.3986	28.4917	19.4175	18.5204
281576	WARS	tryptophanyl-tRNA synthetase	246.126	-0.741105	0.598281	0.288848	-2.56573	0.010296	0.0597602	336.689	330.229	387.023	320.986	166.202	303.513	160.422	115.694	154.457	186.046
531241	ADAM23	ADAM metallopeptidase domain 23	74.2034	0.702576	1.62741	0.274034	2.56383	0.0103525	0.0599004	52.5633	35.4919	42.2976	57.469	91.9909	76.0629	87.9953	88.0652	101.501	108.597
614299	KCNIP4	potassium voltage-gated channel interacting protein 4	62.949	1.29532	2.45432	0.505422	2.56286	0.0103815	0.0599664	12.7857	18.5175	14.8042	63.0758	71.892	86.4016	75.1344	31.9452	124.449	130.485
338052	CAPZB	capping actin protein of muscle Z-line subunit beta	351.971	0.411967	1.3305	0.160798	2.56202	0.0104064	0.0600087	301.174	282.392	313.002	262.115	349.411	456.377	372.965	477.452	368.932	335.893
536093	DHX8	DEAH-box helicase 8	3783.53	-0.590783	0.663982	0.231102	-2.55637	0.0105771	0.0604683	6084.56	6152.44	3746.51	3791.55	2964.58	2392.66	2953.26	2708.44	3320.39	3720.92
522114	IL1RL2	interleukin 1 receptor like 2	187.258	-1.164	0.446273	0.455529	-2.55528	0.0106103	0.0604683	291.229	177.46	106.801	588.707	131.416	238.527	94.7641	73.3877	96.2049	74.0817
511052	INTS3	integrator complex subunit 3	91.8947	-0.75081	0.59427	0.293807	-2.55545	0.010605	0.0604683	86.6584	186.718	132.18	82.6994	88.8988	86.4016	60.9198	87.2018	44.1307	63.1378
505771	PEX1	peroxisomal biogenesis factor 1	60.2324	0.715557	1.64212	0.27984	2.55702	0.0105573	0.0604683	31.2539	38.5782	46.5274	46.2556	63.3887	50.9548	74.4575	71.6609	71.4917	107.755
540228	PRMT6	protein arginine methyltransferase 6	32.4438	-0.858108	0.551675	0.335719	-2.55603	0.0105873	0.0604683	59.6665	49.38	32.7807	37.8455	30.1483	29.539	15.5684	26.7649	14.1218	28.6225
617624	SLC44A2	solute carrier family 44 member 2	320906	-0.464768	0.724587	0.181816	-2.55625	0.0105806	0.0604683	350928	413650	376559	468192	251441	268509	236278	300062	305665	237773
522103	STK39	serine/threonine kinase 39	193.09	0.797028	1.73752	0.311617	2.55772	0.0105361	0.0604683	100.865	64.8113	123.721	259.312	156.153	270.282	257.217	174.404	248.014	276.123
524795	DNAJC17	DnaJ heat shock protein family (Hsp40) member C17	29.5995	1.18691	2.27665	0.464671	2.5543	0.01064	0.0605364	8.52378	12.345	11.6318	26.632	30.1483	14.031	39.9363	68.2074	44.1307	40.4082
514580	TRIM11	tripartite motif containing 11	24.9166	0.965972	1.95338	0.378387	2.55287	0.010684	0.0606853	14.2063	9.25876	24.3211	9.81179	24.737	30.2775	21.6604	40.5791	41.4828	32.8317
767862	C25H16orf58	chromosome 25 C16orf58 homolog	81.1719	-0.815652	0.568152	0.319718	-2.55116	0.0107366	0.0608822	125.015	117.278	112.089	121.946	42.5168	87.14	43.9976	49.2129	48.5437	63.9797
100125937	SNX22	sorting nexin 22	59.1871	-0.807445	0.571393	0.31674	-2.54924	0.0107959	0.0611167	109.389	87.9582	65.5613	75.6909	39.4247	60.5549	36.5519	36.2622	29.1262	51.3521
360196	BANF1	barrier to autointegration factor 1	87.1762	-0.670227	0.628408	0.262998	-2.54842	0.0108213	0.0611595	102.285	114.191	143.812	89.7078	85.8066	106.34	58.2123	50.9397	56.4873	63.9797
518515	BTBD16	BTB domain containing 16	207.071	-0.431913	0.741278	0.169599	-2.54667	0.0108755	0.0611615	272.761	277.763	248.499	203.244	188.62	177.234	171.929	155.409	195.94	179.311
512302	CDH13	cadherin 13	358.392	-0.533301	0.690972	0.209384	-2.547	0.0108655	0.0611615	380.729	558.612	422.976	493.393	265.923	341.914	258.571	260.742	291.262	309.796
536133	GALK2	galactokinase 2	1624.86	-0.376049	0.770545	0.147655	-2.54681	0.0108712	0.0611615	1980.36	1859.47	1782.84	1914.7	1641.15	1559.66	1287.44	1131.9	1362.76	1728.29
511422	COL6A1	collagen type VI alpha 1 chain	179.966	-0.62458	0.648608	0.245391	-2.54524	0.0109202	0.0613114	223.039	243.814	301.371	165.399	158.472	183.88	122.516	170.95	99.7353	130.485
537963	STXBP4	syntaxin binding protein 4	53.4379	0.591017	1.50631	0.23237	2.54343	0.0109769	0.0615283	34.0951	44.7507	35.953	44.8539	52.5662	72.3705	55.5047	59.5735	73.2569	61.4542
507899	MICU1	mitochondrial calcium uptake 1	411.45	-0.573896	0.6718	0.225898	-2.54051	0.011069	0.0616443	470.229	729.899	304.543	548.058	410.48	350.037	343.858	340.174	349.515	267.704
100140439	POM121L2	POM121 transmembrane nucleoporin like 2	1927.53	0.807082	1.74967	0.31761	2.54111	0.01105	0.0616443	910.624	728.356	1339.78	1118.54	2908.92	2062.56	2801.63	2401.07	2477.5	2526.36
282379	TAGLN2	transgelin 2	44.6011	-1.01821	0.493727	0.400886	-2.53991	0.011088	0.0616443	76.714	50.9232	85.6527	29.4354	55.6584	41.3546	18.2759	17.2677	18.5349	52.1939
509292	UBA5	ubiquitin like modifier activating enzyme 5	342.375	-0.721659	0.6064	0.28412	-2.53998	0.011086	0.0616443	508.586	567.87	334.151	392.471	329.312	273.974	250.448	111.377	323.037	332.526
535476	ZNF335	zinc finger protein 335	299.133	-0.475123	0.719406	0.187039	-2.54023	0.011078	0.0616443	394.935	413.558	406.057	263.517	262.831	277.667	220.665	241.748	259.488	250.868
529879	CYM	chymosin	41.1393	1.04017	2.05647	0.410116	2.53629	0.0112035	0.0619626	14.2063	10.8019	19.0339	29.4354	58.7505	61.2934	58.8891	65.6172	52.9568	40.4082
534232	POLR2F	RNA polymerase II subunit F	39.0778	-0.946696	0.518819	0.373083	-2.5375	0.0111648	0.0619626	39.7776	95.6738	57.1018	37.8455	27.8292	36.1853	27.0755	18.9945	31.7741	18.5204
512261	TRAPPC6A	trafficking protein particle complex 6A	29.5702	-0.897391	0.536857	0.353736	-2.53689	0.0111842	0.0619626	24.1507	47.8369	49.6997	50.4606	20.8719	27.3236	17.5991	23.3114	16.7697	17.6786
282105	TYRP1	tyrosinase related protein 1	82.9963	1.13532	2.19668	0.447711	2.53583	0.011218	0.0619626	45.4602	18.5175	41.2402	21.0253	130.643	73.8475	144.854	107.06	123.566	123.75
505283	ABHD6	abhydrolase domain containing 6	3092.89	-0.616848	0.652094	0.243478	-2.53348	0.0112936	0.0622792	4710.81	3487.47	4239.28	3603.73	2680.88	3784.68	2174.84	1494.52	2325.69	2427.02
513213	PAXIP1	PAX interacting protein 1	53.23	0.753322	1.68567	0.297549	2.53175	0.0113493	0.0624855	22.7301	21.6038	52.872	42.0505	56.4314	68.6782	68.3656	61.3003	59.1351	79.1328
509795	DUS2	dihydrouridine synthase 2	105.745	0.671734	1.59299	0.265452	2.53053	0.0113889	0.0626025	73.8728	63.2682	54.9869	71.4859	141.465	126.279	142.823	133.825	133.275	116.174
526819	KLHDC9	kelch domain containing 9	82.602	0.982847	1.97636	0.388494	2.52989	0.0114099	0.0626164	28.4126	38.5782	42.2976	37.8455	127.55	70.8936	140.792	101.879	117.388	120.383
522024	FARSA	phenylalanyl-tRNA synthetase subunit alpha	270.418	-0.768281	0.587117	0.303991	-2.52731	0.011494	0.0628755	403.459	441.334	366.932	336.404	156.926	236.312	187.498	285.78	180.936	108.597
508026	OVOS2	ovostatin 2	67.7281	0.670019	1.59109	0.265104	2.52738	0.0114916	0.0628755	45.4602	46.2938	41.2402	57.469	69.573	51.6932	83.2571	101.879	78.5526	101.862
508410	ARIH1	ariadne RBR E3 ubiquitin protein ligase 1	218.576	-0.561486	0.677604	0.222377	-2.52493	0.0115722	0.0632018	286.967	347.203	251.671	243.893	174.705	172.065	149.592	242.611	157.105	159.949
281349	NEU3	neuraminidase 3	453.461	-0.508798	0.702808	0.20174	-2.52205	0.0116675	0.0633966	538.419	635.768	577.362	508.811	404.296	450.47	401.394	372.119	406.885	239.082
540926	SCMH1	Scm polycomb group protein homolog 1	400.665	-0.527493	0.693759	0.20919	-2.5216	0.0116822	0.0633966	518.53	657.372	452.585	427.514	311.532	290.221	318.814	398.884	342.454	288.75
614056	SGOL1	NA	56.2812	0.802938	1.74465	0.318404	2.52176	0.0116771	0.0633966	21.3095	37.035	29.6083	44.8539	70.346	93.7863	64.9811	56.12	72.3743	72.3981
507212	TPPP2	tubulin polymerization promoting protein family member 2	44.6308	-0.82912	0.562873	0.328675	-2.52262	0.0116486	0.0633966	78.1347	55.5525	58.1592	58.8707	35.5595	41.3546	26.3986	14.6775	39.7176	37.8827
510950	CEP44	centrosomal protein 44	32.5599	1.00262	2.00364	0.397957	2.51943	0.0117546	0.0636855	14.2063	18.5175	13.7467	29.4354	31.6943	19.2003	43.9976	36.2622	51.1916	67.347
783774	NRK	Nik related kinase	123.666	-0.733586	0.601407	0.291235	-2.51888	0.0117729	0.0636855	171.896	162.028	164.961	199.039	75.7572	142.526	83.934	92.3822	76.7874	67.347
507057	PHF12	PHD finger protein 12	45.8748	0.863048	1.81888	0.342846	2.5173	0.0118257	0.0638701	25.5713	21.6038	26.436	26.632	60.2966	45.047	85.2877	49.2129	53.8394	64.8215
527938	SRRT	serrate, RNA effector molecule	122.74	-0.657797	0.633845	0.261498	-2.5155	0.0118865	0.0640966	221.618	182.089	101.514	159.792	88.1257	88.617	93.4104	102.743	92.6744	96.8114
506329	ALDH16A1	aldehyde dehydrogenase 16 family member A1	1122.8	-0.804471	0.572572	0.320122	-2.51301	0.0119705	0.0642447	1426.31	1669.66	1707.77	1698.84	638.525	1383.16	638.304	483.495	623.125	958.853
534731	EPHB1	EPH receptor B1	162.976	0.408174	1.327	0.162394	2.51348	0.0119547	0.0642447	159.111	128.079	152.271	113.536	146.103	189.05	173.283	174.404	180.936	212.985
407226	MOGAT2	monoacylglycerol O-acyltransferase 2	39.6958	0.696264	1.6203	0.276981	2.51376	0.0119452	0.0642447	26.992	20.0606	24.3211	35.0421	43.2898	41.3546	48.059	53.5298	52.9568	51.3521
509658	MOGAT2	monoacylglycerol O-acyltransferase 2	39.6958	0.696264	1.6203	0.276981	2.51376	0.0119452	0.0642447	26.992	20.0606	24.3211	35.0421	43.2898	41.3546	48.059	53.5298	52.9568	51.3521
614494	MOGAT2	monoacylglycerol O-acyltransferase 2	39.6958	0.696264	1.6203	0.276981	2.51376	0.0119452	0.0642447	26.992	20.0606	24.3211	35.0421	43.2898	41.3546	48.059	53.5298	52.9568	51.3521
281794	GNAT1	G protein subunit alpha transducin 1	287.649	-0.450151	0.731966	0.179566	-2.50688	0.0121801	0.0652668	365.102	385.782	341.553	288.747	281.384	324.929	233.526	219.3	220.653	215.51
533920	LYPLAL1	lysophospholipase like 1	32.4318	0.999271	1.99899	0.399523	2.50116	0.0123788	0.0661239	15.6269	23.1469	9.51696	21.0253	37.8786	26.5851	60.2429	58.7102	37.0698	34.5154
407104	PLXNA4	plexin A4	222.823	0.619778	1.53664	0.247757	2.50156	0.0123647	0.0661239	127.857	158.942	125.835	178.014	285.249	229.666	320.167	294.414	283.319	224.771
281728	CSN3	casein kappa	143.153	0.873362	1.83193	0.349496	2.49892	0.0124572	0.0664387	55.4046	103.389	84.5952	107.93	153.06	109.294	282.939	237.431	207.414	90.0766
281401	PIGR	polymeric immunoglobulin receptor	35.1967	0.973979	1.96425	0.389913	2.49794	0.0124917	0.0665182	28.4126	29.3194	19.0339	22.4269	20.0989	16.2464	53.4741	45.7594	76.7874	40.4082
618041	APOC4	apolipoprotein C4	48.4233	-0.856043	0.552466	0.343126	-2.49483	0.0126017	0.0668297	79.5553	86.4151	64.5039	56.0674	26.2831	44.3085	21.6604	32.8086	41.4828	31.148
614453	EFNA2	ephrin A2	732.392	-0.590061	0.664315	0.236533	-2.49463	0.012609	0.0668297	957.505	1208.27	669.36	920.906	646.255	606.288	537.448	362.622	695.499	719.771
534891	TMEM63B	transmembrane protein 63B	525.645	-1.02944	0.489901	0.412534	-2.4954	0.0125814	0.0668297	754.355	913.531	936.892	693.834	230.364	781.306	259.248	259.879	241.836	185.204
414735	CDH5	cadherin 5	178.086	-0.656985	0.634202	0.263559	-2.49275	0.0126758	0.0669252	262.817	257.702	240.039	196.236	134.508	217.85	127.255	127.781	97.9701	118.699
518371	DGKQ	diacylglycerol kinase theta	75.3021	0.590675	1.50595	0.236984	2.49247	0.0126859	0.0669252	34.0951	61.7251	77.1932	75.6909	51.7932	88.617	97.4717	81.1582	92.6744	92.6022
614061	RNF115	ring finger protein 115	103.377	-0.954237	0.516114	0.382739	-2.49318	0.0126604	0.0669252	191.785	172.83	155.444	109.331	53.3393	124.064	43.9976	40.5791	57.3699	85.0256
511650	AGGF1	angiogenic factor with G-patch and FHA domains 1	276.305	-0.34416	0.787767	0.138144	-2.49131	0.0127272	0.0670389	345.213	285.478	308.773	330.797	276.746	240.743	262.632	214.983	258.606	239.082
540305	S1PR2	sphingosine-1-phosphate receptor 2	35.0759	-0.803246	0.573058	0.322497	-2.49071	0.0127488	0.0670491	56.8252	41.6644	45.4699	23.8286	54.8853	34.7083	23.0141	20.7212	17.6523	31.9898
520704	PREX2	phosphatidylinositol-3,4,5-trisphosphate dependent Rac exchange factor 2	377.773	0.614155	1.53066	0.246652	2.48997	0.0127755	0.067086	257.134	226.84	233.694	277.533	494.741	464.501	565.877	330.676	452.781	473.955
513568	SERPINB7	serpin family B member 7	72.5395	0.828378	1.77569	0.33281	2.48904	0.0128089	0.067158	22.7301	30.8625	56.0443	79.896	70.346	85.6631	90.7028	81.1582	74.1395	133.852
541597	KCNAB2	potassium voltage-gated channel subfamily A regulatory beta subunit 2	23.4653	1.10241	2.14713	0.443058	2.48819	0.0128395	0.0672152	5.68252	10.8019	19.0339	8.4101	28.6022	21.4158	38.5825	41.4425	37.9524	22.7296
537018	QSER1	glutamine and serine rich 1	268.019	-0.517891	0.698392	0.208253	-2.48683	0.0128885	0.0672677	323.904	408.928	341.553	250.901	254.328	301.298	217.281	194.262	210.945	176.786
533250	ZDHHC5	zinc finger DHHC-type containing 5	24.9551	0.887303	1.84971	0.356802	2.48682	0.012889	0.0672677	12.7857	20.0606	24.3211	11.2135	18.5528	28.062	35.875	44.896	34.4219	19.3623
523226	PCDHA13	protocadherin alpha 13	118.689	0.721899	1.64935	0.290439	2.48555	0.0129353	0.0674058	68.1903	46.2938	79.308	91.1095	160.018	160.988	168.545	140.732	141.218	130.485
768306	ABHD8	abhydrolase domain containing 8	29.5812	-1.45719	0.364202	0.586791	-2.48332	0.0130166	0.0675199	83.8172	43.2075	46.5274	33.6404	10.0494	37.6622	4.06132	11.224	7.94352	17.6786
282513	PAFAH1B1	platelet activating factor acetylhydrolase 1b regulatory subunit 1	23.5736	-0.793538	0.576928	0.319491	-2.48375	0.0130006	0.0675199	28.4126	29.3194	39.1253	33.6404	19.3258	16.9849	16.2453	18.9945	18.5349	15.1531
280943	TNF	tumor necrosis factor	698.919	-1.9428	0.260112	0.782339	-2.48332	0.0130165	0.0675199	480.173	1254.56	2591.79	1033.04	187.074	813.061	106.948	145.912	116.505	260.128
531367	NXN	nucleoredoxin	174.331	-0.643165	0.640307	0.259124	-2.48208	0.0130619	0.0676521	234.404	276.22	289.739	130.357	132.962	160.988	129.962	117.42	131.509	139.745
515032	NBR1	NBR1, autophagy cargo receptor	57.2175	0.735559	1.66504	0.296684	2.47927	0.0131653	0.068084	32.6745	37.035	39.1253	36.4438	67.2539	42.0931	81.9033	86.3385	79.4352	69.8725
524166	RNF144B	ring finger protein 144B	33.2905	0.983445	1.97718	0.397176	2.47609	0.0132829	0.0685882	11.365	9.25876	32.7807	14.0168	41.7438	39.8776	49.4127	48.3495	41.4828	44.6174
514929	NCSTN	nicastrin	124.312	-0.593916	0.662542	0.239922	-2.47545	0.0133068	0.0686074	187.523	151.226	143.812	151.382	114.409	104.125	67.6887	123.464	72.3743	127.118
281055	CD3G	CD3g molecule	25.2309	0.802746	1.74442	0.324659	2.47258	0.0134142	0.068849	12.7857	16.9744	17.9765	21.0253	22.418	22.8927	37.9057	35.3988	38.835	26.097
538860	PDE12	phosphodiesterase 12	54.72	1.00195	2.00271	0.405219	2.47262	0.0134127	0.068849	26.992	12.345	44.4125	22.4269	73.4381	52.4317	96.1179	63.8905	60.0177	95.1277
531801	SIGIRR	single Ig and TIR domain containing	88.2644	-0.730997	0.602488	0.295515	-2.47364	0.0133746	0.068849	137.801	126.536	105.744	117.741	64.1617	88.617	50.7665	75.1145	36.1872	79.9746
534722	PIAS4	protein inhibitor of activated STAT 4	32.0422	-1.21503	0.430765	0.49195	-2.46982	0.0135181	0.0692777	51.1427	84.8719	35.953	15.4185	37.1056	14.7695	29.1061	6.90708	11.474	33.6735
538194	CELSR2	cadherin EGF LAG seven-pass G-type receptor 2	599.498	-0.416815	0.749077	0.168838	-2.46873	0.0135594	0.0693851	755.775	873.409	551.984	689.628	559.676	462.285	576.031	547.386	504.855	473.955
504381	SF3A1	splicing factor 3a subunit 1	93.8465	0.820401	1.7659	0.332453	2.46772	0.0135977	0.0694766	39.7776	46.2938	119.491	43.4522	88.1257	105.602	175.314	116.557	112.092	91.7603
505859	PYROXD1	pyridine nucleotide-disulphide oxidoreductase domain 1	46.0386	0.730393	1.65909	0.296305	2.465	0.0137012	0.0699008	36.9364	12.345	38.0679	39.2471	44.8359	62.7704	56.1816	45.7594	65.3134	58.9286
507834	ESRRA	estrogen related receptor alpha	103.618	-0.949011	0.517987	0.385446	-2.46211	0.0138121	0.0703612	86.6584	183.632	159.674	193.432	60.2966	134.402	71.75	49.2129	43.2481	53.8776
533382	PKNOX1	PBX/knotted 1 homeobox 1	76.7799	0.664372	1.58488	0.269943	2.46116	0.013849	0.0704436	52.5633	52.4663	68.7336	65.8791	57.2044	52.4317	132.67	106.196	80.3178	99.3369
540033	DNAJC27	DnaJ heat shock protein family (Hsp40) member C27	276.042	-0.63192	0.645317	0.25683	-2.46046	0.0138759	0.0704753	375.046	447.507	341.553	346.216	169.294	285.79	177.344	198.578	179.171	239.924
520875	EEF1B2	eukaryotic translation elongation factor 1 beta 2	27.7625	0.997545	1.9966	0.405556	2.4597	0.0139054	0.0705202	17.0476	10.8019	21.1488	23.8286	19.3258	56.1241	14.8915	49.2129	27.361	37.8827
100135053	ZNF771	zinc finger protein 771	157.974	-0.58748	0.665504	0.23891	-2.459	0.0139326	0.0705533	251.452	194.434	176.593	194.834	132.189	112.248	102.887	100.153	129.744	185.204
NA	GPR89	NA	129.474	-0.5953	0.661907	0.242208	-2.45781	0.0139788	0.0705774	198.888	188.261	105.744	176.612	111.317	114.464	86.6415	80.2948	112.975	119.541
539741	RNASE13	ribonuclease A family member 13 (inactive)	45.8835	-0.831613	0.561901	0.338301	-2.4582	0.0139634	0.0705774	80.9759	86.4151	33.8381	61.6741	32.4674	42.0931	35.1981	24.1748	30.0089	31.9898
506709	FAM78A	family with sequence similarity 78 member A	239.588	-0.537557	0.688937	0.218892	-2.45581	0.0140569	0.0708669	278.444	395.04	237.924	298.559	210.265	139.572	205.097	180.447	240.071	210.459
529923	ABCB9	ATP binding cassette subfamily B member 9	352.289	-0.556255	0.680065	0.226862	-2.45195	0.0142083	0.0713136	480.173	547.81	413.459	388.266	269.015	245.912	296.476	246.928	239.188	395.664
533670	APBB1IP	amyloid beta precursor protein binding family B member 1 interacting protein	53.0224	0.917641	1.88902	0.37417	2.45247	0.0141879	0.0713136	18.4682	27.7763	40.1827	25.2303	69.573	70.1551	93.4104	37.1255	75.9048	72.3981
280795	FOS	Fos proto-oncogene, AP-1 transcription factor subunit	83.4453	0.761233	1.69494	0.310453	2.45201	0.0142061	0.0713136	25.5713	57.0957	66.6187	56.0674	102.04	100.433	140.792	94.1089	86.4961	105.23
414925	BIRC5	baculoviral IAP repeat containing 5	1113.8	-0.92696	0.525966	0.378369	-2.44988	0.0142902	0.0716192	1831.19	1990.63	1630.57	1303.57	544.215	1502.8	632.889	365.212	548.986	787.96
539760	ILF2	interleukin enhancer binding factor 2	370.683	-0.61904	0.651104	0.252879	-2.44796	0.0143666	0.0717908	484.435	584.845	507.571	428.915	241.186	415.761	291.061	239.158	281.554	232.347
614579	MRPL14	mitochondrial ribosomal protein L14	48.2119	-0.720793	0.606764	0.294402	-2.44833	0.014352	0.0717908	79.5553	75.6132	52.872	61.6741	31.6943	40.6161	31.1368	38.8523	41.4828	28.6225
281096	CSF3	colony stimulating factor 3	191.963	-0.610753	0.654855	0.249753	-2.44543	0.0144681	0.0721922	218.777	328.686	236.867	218.663	158.472	223.758	121.163	140.732	158.87	113.648
516212	ISOC2	isochorismatase domain containing 2	183.279	-0.93047	0.524688	0.380763	-2.44369	0.0145377	0.0724336	285.547	319.427	317.232	178.014	102.813	262.897	99.5023	94.1089	87.3787	85.8675
508320	STK19	serine/threonine kinase 19	843.478	-0.635612	0.643668	0.260331	-2.44155	0.0146242	0.0727582	1066.89	1339.43	1018.32	1138.17	570.498	846.292	587.538	836.62	632.834	398.189
532945	CYP20A1	cytochrome P450, family 20, subfamily A, polypeptide 1	145.155	-0.442792	0.735709	0.181477	-2.43994	0.0146899	0.0729782	157.69	203.693	158.616	179.416	138.373	102.648	125.901	108.786	134.157	142.271
514371	ACTR1A	ARP1 actin related protein 1 homolog A	315.903	-0.538799	0.688343	0.220954	-2.43851	0.014748	0.0731604	431.872	361.092	409.229	433.12	237.321	327.144	224.726	196.852	231.245	306.429
516679	TPCN2	two pore segment channel 2	67.3989	-0.851169	0.554335	0.349541	-2.43511	0.0148874	0.0737446	89.4997	114.191	97.2845	103.725	30.1483	72.3705	43.9976	37.9889	49.4264	35.3572
NA	LRRC16B	NA	944.16	-0.402274	0.756665	0.165272	-2.43402	0.0149323	0.0737527	1133.66	1109.51	1303.82	1034.44	794.678	816.015	814.295	706.249	760.813	968.114
504608	SLC25A42	solute carrier family 25 member 42	70.9689	-0.611635	0.654454	0.251275	-2.43413	0.0149278	0.0737527	106.547	74.0701	107.859	79.896	61.0696	59.078	56.1816	73.3877	51.1916	40.4082
511890	CYP4A11	cytochrome P450, family 4, subfamily A, polypeptide 11	363.675	-0.57607	0.670788	0.236815	-2.43258	0.0149919	0.0739397	556.887	564.784	468.446	320.986	267.469	316.806	333.028	219.3	304.502	284.541
511048	RUVBL2	RuvB like AAA ATPase 2	41.0853	-1.38979	0.38162	0.572287	-2.42848	0.0151621	0.0746712	55.4046	128.079	26.436	82.6994	5.41123	27.3236	16.9222	19.8578	15.887	32.8317
531418	CLASP2	cytoplasmic linker associated protein 2	159.928	0.538441	1.4524	0.221847	2.42709	0.0152207	0.0748107	117.912	97.217	118.433	135.963	180.117	153.603	216.604	216.71	216.24	146.48
532127	ITGA9	integrin subunit alpha 9	241.452	0.453799	1.36964	0.187038	2.42624	0.0152563	0.0748107	230.142	135.795	237.924	176.612	235.775	243.697	304.599	273.693	283.319	292.96
504993	NUDT13	nudix hydrolase 13	267.858	1.0248	2.03468	0.422369	2.42632	0.0152529	0.0748107	110.809	86.4151	68.7336	196.236	418.211	245.174	461.637	257.289	378.641	455.434
535056	RPL8	ribosomal protein L8	55.0807	-0.752296	0.593658	0.310279	-2.42458	0.0153261	0.0750451	58.2458	111.105	71.906	63.0758	42.5168	37.6622	52.7972	42.3058	46.7785	24.4133
507824	LRRC8E	leucine rich repeat containing 8 VRAC subunit E	338.53	-0.604996	0.657473	0.249781	-2.4221	0.015431	0.075342	416.245	600.276	468.446	336.404	222.633	288.744	255.863	252.972	325.684	218.036
508519	NPLOC4	NPL4 homolog, ubiquitin recognition factor	124.462	-0.88709	0.540704	0.366237	-2.42218	0.0154279	0.075342	136.381	199.063	272.82	120.545	79.6224	141.787	96.7948	75.1145	82.0831	40.4082
510312	STX5	syntaxin 5	18693.2	-0.581848	0.668107	0.24028	-2.42154	0.0154548	0.0753505	15896.9	29513.8	27540	19737.1	19375.3	19850.9	14233.6	16426.8	15533.1	8824.99
540007	FAAH	fatty acid amide hydrolase	30.3635	0.835392	1.78434	0.345255	2.41964	0.0155358	0.0754383	22.7301	10.8019	17.9765	16.8202	38.6516	38.4007	44.6745	37.9889	32.6567	42.9337
533964	INTS9	integrator complex subunit 9	46.5082	0.577847	1.49262	0.238823	2.41956	0.0155392	0.0754383	34.0951	33.9488	47.5848	35.0421	35.5595	57.601	63.6274	44.896	52.9568	59.7705
506362	RMDN2	regulator of microtubule dynamics 2	858.766	-0.513081	0.700725	0.212002	-2.42017	0.0155133	0.0754383	1139.35	1237.59	850.182	1149.38	674.858	573.795	658.611	610.413	759.048	934.44
510683	PINK1	PTEN induced kinase 1	98.7334	-0.522296	0.696263	0.216174	-2.41609	0.015688	0.0760524	105.127	162.028	117.376	109.331	89.6718	72.3705	88.6722	93.2455	83.8483	65.6634
790873	PIKFYVE	phosphoinositide kinase, FYVE-type zinc finger containing	161.687	0.905894	1.87371	0.375457	2.41277	0.0158316	0.0765307	56.8252	78.6994	96.2271	67.2808	260.512	175.757	282.939	214.983	213.592	170.051
508448	PSMC3	proteasome 26S subunit, ATPase 3	97.0392	0.877245	1.83686	0.363535	2.4131	0.0158175	0.0765307	90.9203	38.5782	43.3551	57.469	110.544	86.4016	188.175	88.0652	182.701	84.1838
531535	SLC13A4	solute carrier family 13 member 4	93.0725	0.989804	1.98592	0.410734	2.40984	0.0159593	0.0770387	55.4046	26.2331	31.7232	43.4522	152.287	113.725	160.422	121.737	112.092	113.648
509488	SEC24C	SEC24 homolog C, COPII coat complex component	159.637	0.624522	1.5417	0.259337	2.40815	0.0160336	0.0772877	127.857	67.8976	140.64	149.98	140.692	220.804	234.88	117.42	175.64	220.562
767927	FAM19A5	family with sequence similarity 19 member A5, C-C motif chemokine like	361.134	-0.642083	0.640787	0.266718	-2.40735	0.016069	0.077306	468.808	663.544	391.253	447.137	231.91	277.667	258.571	253.835	398.059	220.562
618441	MSRB1	methionine sulfoxide reductase B1	98.7083	-0.584855	0.666716	0.242977	-2.40703	0.0160827	0.077306	120.754	151.226	107.859	145.775	68.7999	94.5248	79.1957	79.4314	67.9612	71.5562
281832	HSP90AA1	heat shock protein 90 alpha family class A member 1	26.2212	0.834372	1.78308	0.346809	2.40585	0.0161348	0.0774472	12.7857	18.5175	23.2637	11.2135	27.0561	33.9698	43.3207	37.9889	22.948	31.148
617345	VAV1	vav guanine nucleotide exchange factor 1	162.234	-0.634538	0.644147	0.263822	-2.40517	0.0161648	0.0774817	231.563	256.159	235.809	168.202	96.6291	120.371	149.592	145.049	111.209	107.755
511470	CYP1B1	cytochrome P450, family 1, subfamily B, polypeptide 1	48.1486	0.997467	1.99649	0.415156	2.40263	0.0162775	0.0778034	24.1507	47.8369	22.2062	14.0168	51.7932	25.8466	98.1486	57.8468	70.6091	69.0307
513257	TCAP	titin-cap	332.965	-0.501189	0.706524	0.208562	-2.40306	0.0162584	0.0778034	490.117	283.935	432.493	444.334	300.71	333.052	213.219	257.289	263.019	311.48
508028	SLC28A3	solute carrier family 28 member 3	1413.52	-0.883675	0.541985	0.368279	-2.39948	0.0164186	0.0783678	1851.08	2760.65	2354.92	1578.3	623.064	1846.93	791.281	931.592	801.413	596.021
533029	GMIP	GEM interacting protein	334.254	-0.553474	0.681377	0.230722	-2.39888	0.0164452	0.0783849	490.117	481.455	446.24	350.421	221.86	333.052	289.708	254.698	240.953	234.031
281941	NCAM1	neural cell adhesion molecule 1	247.317	0.949769	1.93156	0.39624	2.39695	0.016532	0.0785787	137.801	64.8113	88.825	156.989	392.701	404.684	413.578	258.152	273.61	282.016
286852	PPP3CA	protein phosphatase 3 catalytic subunit alpha	195.169	0.895077	1.85971	0.3734	2.3971	0.0165254	0.0785787	98.0235	61.7251	100.457	109.331	309.986	194.957	364.842	234.841	259.488	218.036
281054	CD3E	CD3e molecule	253.156	0.621002	1.53794	0.259222	2.39563	0.0165917	0.0787295	169.055	211.408	166.018	193.432	256.647	163.941	404.778	358.305	368.05	239.924
510159	MAPRE2	microtubule associated protein RP/EB family member 2	30.1697	0.841156	1.79148	0.351179	2.39523	0.0166099	0.0787295	28.4126	12.345	22.2062	15.4185	28.6022	27.3236	45.3514	52.6665	25.5958	43.7756
539270	ABT1	activator of basal transcription 1	91.4538	0.814522	1.75872	0.340207	2.3942	0.0166569	0.0787381	72.4521	23.1469	47.5848	78.4943	108.225	131.449	138.085	99.2892	79.4352	136.378
617007	RAD51B	RAD51 paralog B	66.143	0.687902	1.61094	0.287355	2.39391	0.01667	0.0787381	58.2458	26.2331	37.0104	70.0842	61.0696	62.0319	90.7028	88.9286	100.618	66.5052
510090	UNK	unkempt family zinc finger	52.2998	-0.684536	0.622206	0.285978	-2.39366	0.016681	0.0787381	99.4441	47.8369	59.2167	53.264	62.6157	43.57	35.1981	56.12	37.9524	27.7806
541260	VGLL2	vestigial like family member 2	111.823	0.87218	1.83043	0.364566	2.39238	0.0167395	0.0789047	49.7221	35.4919	53.9295	79.896	173.159	124.064	172.606	144.185	141.218	143.954
514928	KIF1C	kinesin family member 1C	1693.62	-0.792882	0.57719	0.331616	-2.39097	0.0168041	0.0790999	1897.96	3649.49	2342.23	1579.7	1270.09	1878.68	1401.83	827.122	1468.67	620.434
534325	CUL3	cullin 3	61.8163	-0.792257	0.57744	0.331854	-2.38737	0.0169695	0.0797319	107.968	118.821	72.9634	56.0674	37.1056	50.9548	30.4599	41.4425	47.6611	54.7195
507414	PIK3R4	phosphoinositide-3-kinase regulatory subunit 4	152.887	0.707807	1.63332	0.296522	2.38703	0.0169852	0.0797319	78.1347	78.6994	76.1357	138.767	206.4	148.433	226.08	186.491	199.471	190.255
507021	SLC25A30	solute carrier family 25 member 30	24.1317	0.911551	1.88107	0.381967	2.38647	0.0170111	0.079744	11.365	16.9744	13.7467	22.4269	19.3258	39.1392	41.967	15.5409	22.948	37.8827
282861	AVPR1B	arginine vasopressin receptor 1B	1421.16	-0.599157	0.66014	0.251516	-2.38218	0.0172104	0.0805676	1970.41	1936.62	1783.9	1264.32	1605.59	1278.3	1229.9	1121.54	1488.97	532.042
505756	RBM4B	RNA binding motif protein 4B	139.908	0.956703	1.94087	0.401945	2.38019	0.0173039	0.0808941	80.9759	98.7601	59.2167	81.2977	154.607	64.9858	247.741	122.601	141.218	347.679
282410	CACNA1B	calcium voltage-gated channel subunit alpha1 B	345.104	-0.498236	0.707972	0.209507	-2.37814	0.0174005	0.0812339	431.872	515.404	461.044	343.413	270.561	369.237	255.186	251.245	291.262	261.812
540431	YIPF3	Yip1 domain family member 3	66.8826	-0.996734	0.501133	0.419293	-2.37718	0.0174458	0.081334	110.809	106.476	78.2506	110.733	40.1977	84.9246	39.9363	24.1748	56.4873	16.8368
526125	GON4L	gon-4-like (C. elegans)	139.809	0.481594	1.39629	0.202874	2.37386	0.0176033	0.0819563	99.4441	81.7857	118.433	133.16	148.422	172.803	193.59	151.956	156.223	142.271
539286	LARP4	La ribonucleoprotein domain family member 4	88.9945	-0.627861	0.647135	0.264553	-2.37329	0.0176304	0.0819705	139.222	135.795	105.744	95.3145	65.7078	97.4787	55.5047	68.2074	69.7265	57.245
280877	NF1	neurofibromin 1	172.589	-1.01968	0.493227	0.430767	-2.36711	0.0179274	0.0832378	275.602	290.108	330.979	165.399	94.31	250.343	65.658	123.464	81.2004	48.8266
537418	TOP3B	DNA topoisomerase III beta	110.336	-0.71265	0.610198	0.301204	-2.366	0.0179813	0.0833744	147.746	206.779	140.64	113.536	78.0763	123.325	83.934	48.3495	76.7874	84.1838
613888	IRX6	iroquois homeobox 6	79.7538	-0.990207	0.503405	0.418982	-2.36336	0.0181098	0.0838565	149.166	149.683	46.5274	135.963	50.2471	99.6941	34.5212	29.3551	47.6611	54.7195
281650	BLVRB	biliverdin reductase B	61.6874	-0.847574	0.555718	0.358794	-2.36229	0.0181626	0.0838727	79.5553	115.734	94.1122	74.2892	34.0134	74.586	42.6439	40.5791	34.4219	26.9388
NA	FAM60A	NA	42.8613	0.828361	1.77567	0.350632	2.36248	0.0181531	0.0838727	26.992	13.8881	28.5509	33.6404	49.4741	30.2775	64.9811	50.0763	60.0177	70.7144
505521	TNFSF14	TNF superfamily member 14	56.4643	-1.09521	0.468068	0.463764	-2.36157	0.0181978	0.0839218	92.341	75.6132	83.5378	102.323	31.6943	84.9246	37.2288	24.1748	17.6523	15.1531
404160	SLCO1B3	solute carrier organic anion transporter family member 1B3	76.58	0.637296	1.55541	0.26992	2.36105	0.0182232	0.0839252	46.8808	38.5782	47.5848	65.8791	98.1752	86.4016	104.917	99.2892	82.9657	95.1277
507245	ECSIT	ECSIT signalling integrator	46.1691	-0.83714	0.559752	0.354791	-2.35953	0.018298	0.084156	51.1427	74.0701	71.906	67.2808	32.4674	48.0009	30.4599	24.1748	15.887	46.3011
516087	SCARA5	scavenger receptor class A member 5	456.768	-0.352326	0.78332	0.149455	-2.35741	0.0184028	0.0845239	500.062	587.931	504.399	459.752	508.656	370.714	324.229	461.047	451.016	399.873
539213	LHX3	LIM homeobox 3	556.879	-0.527286	0.693859	0.223724	-2.35686	0.0184304	0.0845369	744.41	810.141	513.916	825.592	395.793	395.823	445.391	518.031	518.977	400.715
512924	RHOD	ras homolog family member D	42.3543	-0.83928	0.558922	0.356264	-2.35578	0.0184838	0.0846677	80.9759	74.0701	30.6658	40.6488	46.382	39.8776	33.8443	21.5846	16.7697	38.7245
513217	C8B	complement C8 beta chain	128.841	0.633099	1.55089	0.268999	2.35353	0.0185959	0.0846935	98.0235	44.7507	119.491	103.725	136.827	184.619	179.375	117.42	151.81	152.373
536604	DPP8	dipeptidyl peptidase 8	482.328	-0.462173	0.725892	0.196298	-2.35445	0.0185501	0.0846935	633.601	550.896	501.227	719.064	391.928	508.071	336.413	416.151	379.524	386.404
537141	KLHL29	kelch like family member 29	1225.63	-0.536729	0.689332	0.228163	-2.35239	0.0186532	0.0846935	1333.97	2306.97	1124.06	1475.97	1016.54	903.155	1124.99	814.172	1050.31	1106.17
510457	OSER1	oxidative stress responsive serine rich 1	52.7856	-0.657847	0.633823	0.279578	-2.353	0.0186227	0.0846935	79.5553	86.4151	53.9295	58.8707	45.6089	56.8626	31.8137	31.9452	44.1307	38.7245
281422	PRLR	prolactin receptor	246.27	-0.536735	0.689329	0.228134	-2.35272	0.0186367	0.0846935	311.118	382.695	283.394	318.182	164.656	231.881	180.729	189.081	169.462	231.505
100125222	RAVER1	ribonucleoprotein, PTB binding 1	99.6715	-0.804248	0.572661	0.34194	-2.35201	0.0186721	0.0846935	150.587	217.581	116.318	74.2892	75.7572	52.4317	57.5354	64.7538	67.0786	120.383
615539	SNAPC1	small nuclear RNA activating complex polypeptide 1	333.813	0.659984	1.58006	0.280642	2.35169	0.0186882	0.0846935	190.364	171.287	203.029	246.696	479.28	364.807	530.679	360.895	413.946	377.143
513343	TMPRSS4	transmembrane serine protease 4	437.903	-0.44275	0.735731	0.188031	-2.35466	0.0185395	0.0846935	531.316	558.612	556.214	569.084	309.986	372.93	378.38	328.086	381.289	393.138
507300	FOXC2	forkhead box C2	79.2418	-0.512159	0.701172	0.217893	-2.35051	0.0187476	0.0848498	110.809	100.303	83.5378	106.528	66.4808	60.5549	70.3962	53.5298	66.196	74.0817
512150	LOC512150	myeloid-associated differentiation marker-like	177.742	-0.552004	0.682072	0.235188	-2.34708	0.0189213	0.0855221	188.944	325.6	191.397	196.236	156.153	115.941	153.653	133.825	127.096	188.572
616129	HOXB2	homeobox B2	672.822	-0.463921	0.725013	0.197724	-2.3463	0.0189608	0.0855873	767.14	979.885	786.736	850.822	517.932	624.011	483.297	554.293	470.433	693.674
282530	BOLA-DRB3	major histocompatibility complex, class II, DRB3	20739.7	-0.664223	0.631029	0.283342	-2.34424	0.0190657	0.0857201	27627	40147.5	15730.5	29139.6	14514.5	14017	14328.3	12254	17182.7	22456
509486	TNNC1	troponin C1, slow skeletal and cardiac type	4523.6	-0.598615	0.660388	0.255301	-2.34474	0.0190402	0.0857201	5865.78	8396.15	3662.97	6352.43	2969.22	3718.96	3236.2	3821.34	3353.93	3858.98
521662	ZNF200	zinc finger protein 200	60.4989	-0.574751	0.671402	0.245127	-2.34471	0.0190421	0.0857201	80.9759	95.6738	54.9869	77.0926	54.8853	45.7854	52.1203	39.7157	59.1351	44.6174
515878	ORMDL2	ORMDL sphingolipid biosynthesis regulator 2	70.9446	0.73433	1.66362	0.313574	2.34181	0.0191907	0.0861686	29.8332	38.5782	63.4464	37.8455	93.537	79.7553	85.2877	98.4258	74.1395	108.597
535090	KPNA4	karyopherin subunit alpha 4	83.7489	0.791975	1.73144	0.338297	2.34106	0.019229	0.0862271	59.6665	27.7763	54.9869	44.8539	116.728	106.34	145.531	84.6117	109.444	87.5511
523297	TCP11	t-complex 11	55.6601	0.617237	1.53393	0.264051	2.33757	0.0194094	0.0868076	24.1507	33.9488	46.5274	51.8623	61.0696	71.6321	67.6887	69.0708	58.2525	72.3981
516420	USP46	ubiquitin specific peptidase 46	42.0837	0.752497	1.68471	0.321913	2.33758	0.0194092	0.0868076	29.8332	13.8881	26.436	33.6404	51.0202	52.4317	62.9505	39.7157	50.309	60.6123
517400	SNX30	sorting nexin family member 30	618.864	-0.364038	0.776987	0.155782	-2.33685	0.0194472	0.0868625	730.204	780.822	767.702	684.022	521.797	502.901	530.679	478.315	604.59	587.603
533245	EXOSC3	exosome component 3	1383.9	-0.503477	0.705405	0.215863	-2.3324	0.0196799	0.0876718	1930.64	1740.65	1702.48	1537.65	1204.39	1086.3	1005.85	806.401	1118.27	1706.41
282309	PI4KA	phosphatidylinositol 4-kinase alpha	28.6003	-0.943243	0.520062	0.404339	-2.3328	0.0196586	0.0876718	73.8728	27.7763	38.0679	29.4354	19.3258	14.7695	14.8915	25.0382	15.887	26.9388
511885	PLEKHB1	pleckstrin homology domain containing B1	756.317	-0.558749	0.678891	0.239692	-2.33111	0.0197475	0.0878582	826.807	1069.39	1111.37	939.128	559.676	802.722	668.764	639.768	568.403	377.143
327703	CACNB1	calcium voltage-gated channel auxiliary subunit beta 1	479.15	-0.374329	0.771464	0.160679	-2.32967	0.0198238	0.088083	502.903	643.484	540.352	566.28	453.77	371.453	479.236	448.96	447.485	337.577
512056	RASGRP2	RAS guanyl releasing protein 2	91.3017	0.687979	1.61102	0.295455	2.32854	0.0198835	0.0882331	36.9364	54.0094	72.9634	67.2808	115.955	106.34	144.854	91.5188	92.6744	130.485
508900	IST1	IST1, ESCRT-III associated factor	142.584	-0.598534	0.660425	0.257252	-2.32665	0.0199841	0.0884492	177.579	211.408	186.11	178.014	107.452	124.064	158.391	76.8412	121.801	84.1838
534164	SLIT2	slit guidance ligand 2	46.2979	1.17826	2.26304	0.506371	2.32687	0.0199719	0.0884492	14.2063	16.9744	11.6318	40.6488	57.2044	54.6471	37.2288	25.0382	90.9092	114.49
404168	HNF4G	hepatocyte nuclear factor 4 gamma	213.288	-0.532257	0.691472	0.229041	-2.32385	0.0201334	0.0889941	281.285	245.357	320.404	250.901	163.883	226.712	137.408	195.988	134.157	176.786
282241	GALNT1	polypeptide N-acetylgalactosaminyltransferase 1	468.895	-0.582419	0.667843	0.250727	-2.32292	0.0201833	0.0890723	617.974	708.295	513.916	616.741	356.368	553.856	323.552	252.972	315.093	430.179
505401	TADA2A	transcriptional adaptor 2A	56.556	-0.570871	0.67321	0.245795	-2.32255	0.0202033	0.0890723	72.4521	58.6388	82.4804	68.6825	55.6584	55.3856	33.1674	54.3932	47.6611	37.0409
100125221	UBAP2L	ubiquitin associated protein 2 like	67.3631	0.799796	1.74086	0.3452	2.31691	0.0205088	0.0903021	58.2458	29.3194	24.3211	43.4522	88.8988	79.0168	121.84	81.1582	74.1395	73.2399
527786	SLC25A25	solute carrier family 25 member 25	1796.05	-0.519217	0.697751	0.224212	-2.31574	0.0205722	0.0904648	2402.29	2743.68	1690.85	2228.68	1515.14	1036.08	1418.75	1282.13	1628.42	2014.52
516001	TAF5	TATA-box binding protein associated factor 5	65.8432	-0.555689	0.680332	0.240027	-2.31511	0.0206071	0.0905013	73.8728	77.1563	90.9399	72.8876	77.3033	76.0629	58.8891	43.1692	49.4264	38.7245
508356	ITIH1	inter-alpha-trypsin inhibitor heavy chain 1	209.076	-0.480491	0.716734	0.207598	-2.31453	0.0206389	0.0905244	306.856	300.91	227.35	221.466	163.11	149.172	163.13	190.808	202.119	165.842
509485	PERP	PERP, TP53 apoptosis effector	50.4237	0.638301	1.55649	0.276156	2.31138	0.020812	0.0911662	31.2539	30.8625	41.2402	29.4354	61.8426	62.0319	67.0118	50.9397	72.3743	57.245
515490	ARHGAP31	Rho GTPase activating protein 31	37.5036	0.746304	1.67749	0.322998	2.31055	0.0208577	0.0912489	21.3095	27.7763	26.436	23.8286	39.4247	51.6932	34.5212	55.2566	29.1262	65.6634
326600	ARPC1B	actin related protein 2/3 complex subunit 1B	45.8792	-0.883348	0.542108	0.382629	-2.30863	0.0209642	0.0915974	85.2378	100.303	35.953	53.264	23.964	28.062	29.783	36.2622	24.7132	41.2501
541086	MAN2C1	mannosidase alpha class 2C member 1	208.161	-0.694459	0.617941	0.300898	-2.30795	0.0210017	0.0916439	265.658	317.884	291.854	259.312	153.06	273.974	139.439	118.284	171.227	90.9185
513929	FKBPL	FK506 binding protein like	55.1557	-0.764751	0.588555	0.331459	-2.30723	0.0210422	0.0917029	69.6109	111.105	56.0443	65.8791	45.6089	62.7704	25.0448	27.6283	43.2481	44.6174
515865	TMEM253	transmembrane protein 253	77.3256	-0.735132	0.600763	0.318773	-2.30613	0.0211032	0.0918513	89.4997	131.166	114.204	84.101	64.9348	97.4787	43.3207	59.5735	30.8915	58.0868
524061	ADARB2	adenosine deaminase, RNA specific B2 (inactive)	33.9989	0.688232	1.61131	0.298586	2.30497	0.0211682	0.0920167	24.1507	29.3194	15.8616	23.8286	36.3325	32.4929	45.3514	38.8523	44.1307	49.6684
539596	TGFBI	transforming growth factor beta induced	311.646	-0.386032	0.765231	0.167544	-2.30406	0.0212194	0.0921221	380.729	353.376	395.483	372.848	264.377	286.528	237.587	232.25	286.849	306.429
618286	TBC1D14	TBC1 domain family member 14	98.2494	-0.855083	0.552833	0.371244	-2.30329	0.0212623	0.0921906	166.214	135.795	150.157	114.938	66.4808	146.218	50.7665	37.9889	60.9003	53.0358
521240	WDR75	WD repeat domain 75	271.591	-0.481114	0.716424	0.208982	-2.30218	0.021325	0.0923453	454.602	333.315	231.579	325.191	239.64	207.511	232.849	202.032	256.841	232.347
538975	CNN3	calponin 3	214.157	0.889941	1.8531	0.387049	2.2993	0.021488	0.0929317	102.285	66.3544	148.042	224.269	208.719	559.764	251.802	154.546	178.288	247.5
512002	HIBADH	3-hydroxyisobutyrate dehydrogenase	33.2321	0.725587	1.65357	0.315634	2.29882	0.021515	0.0929317	25.5713	12.345	19.0339	35.0421	32.4674	45.7854	42.6439	37.9889	31.7741	49.6684
512470	DHX29	DExH-box helicase 29	445.724	-0.485228	0.714384	0.211158	-2.29795	0.0215649	0.0930294	622.236	640.397	364.817	608.331	366.418	350.776	338.443	328.95	421.007	415.868
514748	RMDN3	regulator of microtubule dynamics 3	44.7441	0.762567	1.69651	0.331993	2.29694	0.0216224	0.0931596	24.1507	33.9488	17.9765	32.2387	56.4314	59.078	73.7807	39.7157	51.1916	58.9286
508881	CMTM6	CKLF like MARVEL transmembrane domain containing 6	80.0712	-0.672629	0.627362	0.29299	-2.29574	0.0216905	0.093335	105.127	145.054	76.1357	113.536	54.1123	78.2783	67.6887	44.0326	67.0786	49.6684
534203	SLAIN2	SLAIN motif family member 2	147.51	-0.478	0.717972	0.208507	-2.29249	0.0218774	0.0940203	218.777	189.805	117.376	173.809	160.018	134.402	98.8255	130.371	109.444	142.271
540340	SYNPO2	synaptopodin 2	186.452	-0.603238	0.658275	0.263275	-2.29129	0.0219468	0.0941997	238.666	365.721	191.397	173.809	156.926	183.142	182.759	123.464	115.622	133.01
280976	ACO2	aconitase 2	56.9044	-0.699393	0.615831	0.305323	-2.29066	0.0219829	0.0942075	120.754	75.6132	65.5613	40.6488	50.2471	33.9698	42.6439	50.9397	42.3655	46.3011
509065	RGSL1	regulator of G protein signaling like 1	523.719	-0.446879	0.733628	0.195159	-2.28982	0.0220315	0.0942075	666.276	751.503	509.686	627.954	467.685	390.653	470.436	327.223	482.79	542.985
534608	ZBTB48	zinc finger and BTB domain containing 48	275.547	-0.707036	0.612577	0.30872	-2.29022	0.0220085	0.0942075	373.626	421.273	416.632	316.781	181.663	382.53	175.314	143.322	182.701	161.633
100125833	RERGL	RERG like	72.4023	0.836401	1.78559	0.365501	2.28837	0.0221162	0.0944511	39.7776	24.69	45.4699	40.6488	106.679	134.402	87.9953	63.8905	97.9701	82.5001
503554	COX6B2	cytochrome c oxidase subunit 6B2	36.6105	-0.882299	0.542502	0.385674	-2.28768	0.022156	0.0945026	36.9364	63.2682	64.5039	54.6657	18.5528	25.8466	20.9835	20.7212	18.5349	42.0919
100125266	LOC100125266	alkaline phosphatase-like	123.732	0.959516	1.94466	0.419535	2.2871	0.0221902	0.0945304	78.1347	52.4663	47.5848	44.8539	194.804	81.9707	178.698	126.918	182.701	249.184
541166	ETV5	ETS variant 5	42.7489	0.682792	1.60524	0.29882	2.28496	0.0223151	0.0948542	22.7301	24.69	46.5274	39.2471	30.1483	32.4929	61.5967	56.12	60.9003	53.0358
538878	ZNF70	zinc finger protein 70	37.6455	-0.923376	0.527274	0.404131	-2.28485	0.0223219	0.0948542	62.5077	61.7251	48.6423	56.0674	18.5528	49.4778	18.2759	21.5846	19.4175	20.2041
616164	CHMP4B	charged multivesicular body protein 4B	41.3562	0.869171	1.82661	0.381157	2.28035	0.022587	0.0957418	26.992	21.6038	14.8042	26.632	54.8853	44.3085	83.2571	50.0763	56.4873	34.5154
540216	TUBG2	tubulin gamma 2	129.066	0.557323	1.47154	0.244389	2.28048	0.0225794	0.0957418	122.174	66.3544	120.548	91.1095	120.593	145.48	178.698	98.4258	155.34	191.939
513301	PIK3C2G	phosphatidylinositol-4-phosphate 3-kinase catalytic subunit type 2 gamma	433.73	0.675276	1.5969	0.296226	2.27959	0.0226318	0.0958127	279.864	245.357	190.339	332.199	619.972	660.935	484.651	392.84	503.972	627.169
513558	BSCL2	BSCL2, seipin lipid droplet biogenesis associated	192.234	-0.731378	0.602328	0.320997	-2.27846	0.0226994	0.0958178	136.381	328.686	399.712	204.646	130.643	181.665	131.316	147.639	160.636	101.021
504318	GAS8	growth arrest specific 8	269.92	-0.668081	0.629343	0.293268	-2.27805	0.0227234	0.0958178	386.411	393.497	335.209	346.216	196.35	245.174	167.191	110.513	183.584	335.051
511119	GJC1	gap junction protein gamma 1	1179.8	-1.49271	0.355344	0.655002	-2.27894	0.0226707	0.0958178	2255.96	2484.43	1717.28	1841.81	405.842	1755.35	337.766	368.665	245.367	385.562
539742	PAK4	p21 (RAC1) activated kinase 4	1344.76	-0.391741	0.762209	0.171991	-2.27768	0.0227455	0.0958178	1639.41	1813.17	1754.29	1195.64	1229.9	1287.9	1142.58	1219.1	1230.36	935.282
533554	FBXO38	F-box protein 38	127.024	-0.658826	0.633394	0.289686	-2.27428	0.0229494	0.0964991	164.793	165.115	231.579	117.741	98.9482	157.295	76.4882	90.6554	75.0222	92.6022
513676	SIX5	SIX homeobox 5	52.2354	0.677484	1.59935	0.297921	2.27404	0.0229638	0.0964991	32.6745	32.4057	66.6187	37.8455	30.9213	45.047	82.5802	56.9834	74.1395	63.1378
508482	CPNE5	copine 5	159.696	-0.545299	0.685249	0.239876	-2.27326	0.0230107	0.0965305	211.674	245.357	174.478	192.031	126.004	129.233	142.823	87.2018	114.74	173.419
528151	DHX33	DEAH-box helicase 33	99.0794	-0.869011	0.547522	0.382324	-2.27297	0.023028	0.0965305	143.484	149.683	135.352	163.997	48.7011	129.233	41.967	54.3932	41.4828	82.5001
512144	VPS53	VPS53, GARP complex subunit	495.071	-0.514897	0.699843	0.226611	-2.27216	0.0230769	0.096617	681.903	637.311	611.201	622.348	361.779	580.441	395.302	315.135	333.628	411.659
540027	RASAL3	RAS protein activator like 3	510.965	-0.46334	0.725305	0.204011	-2.27116	0.0231376	0.0967519	694.688	749.959	553.041	398.078	566.633	319.76	515.788	442.053	456.311	413.342
511765	ECSCR	endothelial cell surface expressed chemotaxis and apoptosis regulator	54.1406	-0.766452	0.587861	0.337632	-2.27008	0.0232027	0.0969055	96.6029	87.9582	68.7336	53.264	35.5595	56.8626	39.2594	37.9889	44.1307	21.0459
515976	CCRL2	C-C motif chemokine receptor like 2	50.6006	0.780963	1.71828	0.344356	2.26789	0.0233356	0.0973412	29.8332	27.7763	20.0914	37.8455	68.7999	53.9087	79.8726	61.3003	79.4352	47.1429
538671	SUPT6H	SPT6 homolog, histone chaperone	311.009	-0.612132	0.654229	0.269995	-2.26719	0.0233785	0.0974009	427.61	384.238	492.767	347.618	228.818	405.423	202.389	215.846	228.597	176.786
514666	APEH	acylaminoacyl-peptide hydrolase	50.0209	-1.23074	0.426097	0.543184	-2.2658	0.0234638	0.097637	102.285	140.424	74.0208	12.6152	21.6449	23.6312	14.8915	49.2129	37.0698	24.4133
541169	NOP2	NOP2 nucleolar protein	47.7316	0.851493	1.80437	0.376652	2.26069	0.0237785	0.0987055	48.3014	9.25876	31.7232	25.2303	54.1123	53.9087	76.4882	46.6228	80.3178	51.3521
522055	TMPRSS7	transmembrane serine protease 7	224.096	0.466703	1.38195	0.206443	2.26069	0.0237784	0.0987055	147.746	169.744	151.214	242.491	228.818	296.867	261.278	198.578	245.367	298.852
511618	LRIT3	leucine rich repeat, Ig-like and transmembrane domains 3	2751.54	-0.741792	0.597996	0.328224	-2.26002	0.0238201	0.0987576	3094.13	6564.46	2392.99	3536.45	1632.65	1931.85	2970.86	2179.18	1867.61	1345.26
281849	IGF2R	insulin like growth factor 2 receptor	320.122	0.710727	1.63663	0.315068	2.25579	0.0240836	0.0993669	171.896	160.485	194.569	169.604	514.067	408.377	439.976	365.212	437.776	339.261
617636	MMAB	metabolism of cobalamin associated B	169.448	-0.730164	0.602835	0.323669	-2.2559	0.024077	0.0993669	237.245	317.884	180.822	236.885	85.8066	131.449	108.302	95.8357	103.266	196.99
767847	PMPCA	peptidase, mitochondrial processing alpha subunit	38.9485	0.730552	1.65927	0.323787	2.25627	0.0240535	0.0993669	26.992	35.4919	19.0339	29.4354	35.5595	41.3546	58.8891	69.9342	45.0133	27.7806
518283	PTAFR	platelet activating factor receptor	74.2336	0.736526	1.66616	0.326396	2.25654	0.0240367	0.0993669	25.5713	33.9488	64.5039	72.8876	79.6224	63.5088	111.686	107.923	109.444	73.2399
526739	GPAT2	glycerol-3-phosphate acyltransferase 2, mitochondrial	94.9226	-0.594779	0.662146	0.263767	-2.25494	0.0241372	0.0994676	147.746	135.795	141.697	81.2977	65.7078	93.0478	68.3656	70.7975	72.3743	72.3981
540891	CNOT4	CCR4-NOT transcription complex subunit 4	39.7544	0.982852	1.97637	0.435983	2.25434	0.0241751	0.0995032	21.3095	15.4313	16.919	12.6152	64.9348	39.8776	71.0731	44.896	59.1351	51.3521
509328	CSGALNACT2	chondroitin sulfate N-acetylgalactosaminyltransferase 2	62.4008	0.818724	1.76385	0.363496	2.25236	0.0242997	0.0998954	42.6189	26.2331	26.436	64.4775	64.9348	45.047	52.1203	117.42	98.8527	85.8675
407122	CSNK1D	casein kinase 1, delta	450.574	-0.388589	0.763876	0.172709	-2.24996	0.0244514	0.100102	514.268	581.759	576.305	501.803	381.878	454.162	335.059	326.359	416.594	417.552
523542	CSNK1D	casein kinase 1 delta	450.574	-0.388589	0.763876	0.172709	-2.24996	0.0244514	0.100102	514.268	581.759	576.305	501.803	381.878	454.162	335.059	326.359	416.594	417.552
788858	LIX1L	limb and CNS expressed 1 like	235.973	-0.427624	0.743485	0.190075	-2.24976	0.024464	0.100102	340.951	237.641	261.188	313.977	201.762	245.174	206.45	186.491	180.053	186.046
504481	MSMO1	methylsterol monooxygenase 1	5965.94	-0.505087	0.704618	0.224512	-2.24971	0.0244674	0.100102	6546.26	10610.5	5429.96	7026.64	5387.27	4691.53	4891.18	3460.45	5720.22	5895.39
287007	PDC	phosducin	48.3517	0.860959	1.81624	0.382553	2.25056	0.0244134	0.100102	12.7857	15.4313	47.5848	32.2387	61.0696	49.4778	66.3349	58.7102	75.9048	63.9797
504741	COLEC12	collectin subfamily member 12	62.7756	0.706008	1.63128	0.313961	2.24871	0.0245309	0.100121	29.8332	37.035	45.4699	42.0505	81.9415	83.4477	101.533	50.0763	86.4961	69.8725
504908	DOLPP1	dolichyldiphosphatase 1	115.636	-0.496338	0.708904	0.220689	-2.24904	0.0245102	0.100121	157.69	174.373	144.869	96.7162	104.359	107.817	94.7641	74.2511	97.9701	103.546
510646	LMF2	lipase maturation factor 2	548.928	-0.440855	0.736698	0.196094	-2.24818	0.0245646	0.100139	581.038	870.323	653.498	546.657	510.975	485.178	524.587	427.375	542.807	346.837
281653	CABP1	calcium binding protein 1	484.645	-0.493568	0.710267	0.219723	-2.24632	0.0246837	0.100384	599.506	754.589	597.454	451.342	432.125	442.346	399.363	418.742	493.381	257.602
513723	RALGDS	ral guanine nucleotide dissociation stimulator	101.393	-0.587024	0.665715	0.261283	-2.2467	0.0246594	0.100384	125.015	160.485	120.548	91.1095	112.09	87.14	83.934	113.967	75.0222	44.6174
536944	CLEC1A	C-type lectin domain family 1 member A	245.906	-0.369594	0.774	0.164868	-2.24175	0.0249774	0.101216	315.38	341.031	247.441	227.073	256.647	185.357	219.988	220.163	214.475	231.505
509694	USP22	ubiquitin specific peptidase 22	95.2133	-0.558865	0.678836	0.249236	-2.24231	0.0249414	0.101216	139.222	143.511	116.318	77.0926	91.9909	81.2322	79.8726	49.2129	78.5526	95.1277
516156	ZNF331	zinc finger protein 331	310.323	-0.479336	0.717308	0.213792	-2.24207	0.0249569	0.101216	399.197	371.893	431.436	350.421	255.101	363.33	196.974	270.239	235.658	228.98
523408	IPO8	importin 8	45.816	0.673045	1.59444	0.300337	2.24096	0.0250284	0.101303	19.8888	26.2331	42.2976	35.0421	51.0202	46.5239	63.6274	52.6665	46.7785	74.0817
508582	ACAP1	ArfGAP with coiled-coil, ankyrin repeat and PH domains 1	138.915	-0.768751	0.586925	0.34336	-2.23891	0.0251617	0.101601	200.309	231.469	228.407	135.963	80.3954	183.88	98.8255	68.2074	74.1395	87.5511
515225	GHDC	GH3 domain containing	981.933	-0.548824	0.683577	0.245088	-2.23929	0.0251371	0.101601	1403.58	1357.95	1050.04	1359.63	663.262	923.094	751.344	587.965	639.012	1083.45
505318	OLFML3	olfactomedin like 3	94.0615	-0.94262	0.520287	0.421372	-2.23703	0.0252845	0.101976	257.134	132.709	46.5274	92.5111	90.4448	59.8165	52.1203	47.4862	41.4828	120.383
533166	SORL1	sortilin related receptor 1	79.2732	-0.657397	0.634021	0.294157	-2.23485	0.0254272	0.10243	150.587	115.734	71.906	65.8791	81.9415	58.3395	65.658	88.9286	43.2481	50.5103
NA	C4H7orf73	NA	34.1036	0.70022	1.62475	0.313477	2.23372	0.0255014	0.10256	19.8888	20.0606	21.1488	35.0421	33.2404	57.601	44.6745	44.896	29.1262	35.3572
514567	DDX27	DEAD-box helicase 27	1242.89	-0.447717	0.733202	0.200461	-2.23344	0.0255197	0.10256	1426.31	2084.76	1111.37	1419.91	1130.95	867.708	1071.51	951.45	1135.04	1229.93
615606	AK8	adenylate kinase 8	175.904	-0.491873	0.711101	0.220471	-2.23101	0.0256807	0.102602	196.047	259.245	214.66	189.227	170.067	197.173	142.146	135.551	160.636	94.2858
530096	C19H17orf64	chromosome 19 C17orf64 homolog	60.1317	-0.792312	0.577418	0.354918	-2.23238	0.0255897	0.102602	125.015	111.105	49.6997	46.2556	50.2471	64.2473	37.9057	39.7157	47.6611	29.4643
517505	C25H7orf26	chromosome 25 C7orf26 homolog	56.474	0.612168	1.52855	0.274382	2.23108	0.0256759	0.102602	41.1983	29.3194	38.0679	49.0589	64.1617	75.3244	84.6108	47.4862	72.3743	63.1378
767991	RNF24	ring finger protein 24	227.824	-0.597442	0.660925	0.267748	-2.23135	0.0256577	0.102602	275.602	302.453	363.76	250.901	180.117	272.497	209.158	153.682	160.636	109.439
539797	RTKN2	rhotekin 2	43.8366	0.890163	1.85339	0.398982	2.23109	0.0256754	0.102602	25.5713	16.9744	15.8616	26.632	66.4808	54.6471	62.2736	80.2948	45.0133	44.6174
615542	MAD2L1BP	MAD2L1 binding protein	250.334	-0.511645	0.701422	0.229444	-2.22994	0.0257516	0.102671	302.594	361.092	320.404	325.191	163.883	234.097	184.79	252.972	175.64	182.679
509497	SUMF2	sulfatase modifying factor 2	214.459	-0.584532	0.666866	0.26214	-2.22984	0.025758	0.102671	345.213	265.418	263.303	235.483	178.571	286.528	146.208	138.142	135.04	150.689
528654	VPS41	VPS41, HOPS complex subunit	70.167	0.79163	1.73103	0.355268	2.22826	0.025863	0.102894	22.7301	37.035	54.9869	50.4606	89.6718	96.7402	114.394	66.4806	53.8394	115.332
615021	ZNF628	zinc finger protein 628	97.8991	-0.667004	0.629813	0.299361	-2.22809	0.0258743	0.102894	134.96	145.054	164.961	92.5111	64.1617	115.202	66.3349	75.9778	60.9003	58.9286
538437	GEM	GTP binding protein overexpressed in skeletal muscle	49.227	-0.566263	0.675364	0.254417	-2.22573	0.0260322	0.103383	62.5077	72.5269	65.5613	36.4438	57.2044	45.047	46.0283	40.5791	33.5393	32.8317
282061	SCN5A	sodium voltage-gated channel alpha subunit 5	57.0456	-0.762027	0.589667	0.342431	-2.22535	0.026058	0.103383	59.6665	120.364	64.5039	61.6741	53.3393	51.6932	35.875	50.9397	54.722	17.6786
512064	DIP2B	disco interacting protein 2 homolog B	563.922	-0.410041	0.752602	0.184354	-2.22421	0.0261343	0.103565	750.093	709.838	637.637	641.971	480.826	609.242	546.924	404.064	399.824	458.802
511672	MED11	mediator complex subunit 11	24.8988	-0.809072	0.570749	0.363882	-2.22344	0.026186	0.103649	39.7776	37.035	38.0679	28.0337	16.2337	22.1542	13.5377	23.3114	11.474	19.3623
100124510	BAP1	BRCA1 associated protein 1	517.807	-0.42495	0.744864	0.191281	-2.2216	0.0263105	0.103784	531.316	783.908	614.373	545.255	493.968	309.421	513.08	450.687	490.733	445.332
503685	CST6	cystatin E/M	24.6765	-0.962648	0.513114	0.433316	-2.22158	0.0263115	0.103784	46.8808	46.2938	31.7232	26.632	12.3685	26.5851	10.8302	13.8142	10.5914	21.0459
512136	NXF1	nuclear RNA export factor 1	13237.2	-0.531016	0.692067	0.239009	-2.22174	0.0263011	0.103784	10785.4	18887.9	19491.8	16353.4	12712.5	13389.3	10195.9	13132.9	11143	6279.27
614279	ZNF706	zinc finger protein 706	132.622	-0.999913	0.50003	0.450337	-2.22037	0.026394	0.103989	169.055	249.986	327.807	91.1095	46.382	81.2322	74.4575	39.7157	123.566	122.908
NA	ADCK3	NA	99.6398	0.953889	1.93709	0.429781	2.21947	0.0264544	0.104107	41.1983	27.7763	62.389	36.4438	168.521	84.1861	167.868	116.557	131.509	159.949
509696	PDSS1	decaprenyl diphosphate synthase subunit 1	93.0153	0.601365	1.51715	0.271045	2.21869	0.0265078	0.104181	69.6109	43.2075	83.5378	67.2808	103.586	152.864	93.4104	82.0215	104.148	130.485
782444	TRIM8	tripartite motif containing 8	57.4532	0.856757	1.81096	0.386234	2.21823	0.0265391	0.104181	29.8332	41.6644	32.7807	25.2303	73.4381	39.8776	122.516	93.2455	67.9612	47.9848
NA	ZAK	NA	50.058	0.905905	1.87372	0.408461	2.21785	0.0265649	0.104181	31.2539	23.1469	20.0914	50.4606	48.7011	44.3085	75.8113	121.737	55.6047	29.4643
614918	HMGN4	high mobility group nucleosomal binding domain 4	118.773	0.732652	1.66169	0.330567	2.21635	0.0266674	0.104401	88.0791	26.2331	100.457	92.5111	136.827	198.65	141.469	122.601	121.801	159.107
615639	OCEL1	occludin/ELL domain containing 1	43.2602	-0.674368	0.626607	0.304299	-2.21614	0.0266822	0.104401	62.5077	46.2938	70.8485	57.469	29.3752	44.3085	25.0448	31.9452	36.1872	28.6225
518321	C1QBP	complement C1q binding protein	35.6799	0.725335	1.65328	0.327511	2.21469	0.0267814	0.104669	12.7857	26.2331	42.2976	21.0253	30.9213	51.6932	53.4741	44.896	41.4828	31.9898
514307	INPP5J	inositol polyphosphate-5-phosphatase J	80.2622	-0.476793	0.718573	0.215465	-2.21286	0.0269073	0.10492	109.389	80.2426	114.204	98.1179	65.7078	70.1551	59.566	68.2074	68.8439	68.1889
538384	PRDM1	PR/SET domain 1	330.886	-0.634462	0.644181	0.286663	-2.21326	0.0268795	0.10492	510.006	535.465	337.324	339.208	291.433	226.712	221.342	161.453	233.01	452.909
508386	CD48	CD48 molecule	23.9593	-1.02404	0.491737	0.463696	-2.20843	0.0272141	0.104983	55.4046	23.1469	53.9295	16.8202	11.5955	19.9388	14.8915	11.224	14.1218	18.5204
540997	CNTNAP1	contactin associated protein 1	423.516	0.631579	1.54926	0.285832	2.20961	0.0271319	0.104983	298.332	191.348	287.624	287.345	593.689	419.454	697.193	394.567	561.342	504.261
616960	COMMD4	COMM domain containing 4	23.5755	-0.97556	0.508542	0.441814	-2.20808	0.0272388	0.104983	35.5158	61.7251	16.919	23.8286	19.3258	25.8466	15.5684	8.63385	13.2392	15.1531
520313	GABPB1	GA binding protein transcription factor subunit beta 1	48.1226	-0.534146	0.690567	0.241673	-2.21021	0.0270909	0.104983	49.7221	61.7251	52.872	64.4775	56.4314	45.7854	44.6745	30.2185	45.0133	30.3062
513539	LIMK2	LIM domain kinase 2	120.535	-0.659327	0.633174	0.29833	-2.21006	0.0271011	0.104983	169.055	189.805	185.052	127.553	68.0269	137.356	94.0873	83.7483	72.3743	78.2909
281306	MDH2	malate dehydrogenase 2	56.7501	-0.711262	0.610786	0.322008	-2.20883	0.0271863	0.104983	69.6109	97.217	81.4229	68.6825	36.3325	45.047	37.9057	25.9015	39.7176	65.6634
282305	PGLYRP1	peptidoglycan recognition protein 1	158.473	-0.609057	0.655625	0.275873	-2.20774	0.0272624	0.104983	210.253	277.763	182.937	190.629	97.4021	141.049	117.778	88.0652	113.857	165
615920	SLC2A11	solute carrier family 2 member 11	324.674	-0.552982	0.68161	0.250459	-2.20788	0.0272529	0.104983	373.626	546.267	369.047	434.522	209.492	337.483	249.771	222.753	208.297	295.485
530506	SMARCAD1	SWI/SNF-related, matrix-associated actin-dependent regulator of chromatin, subfamily a, containing DEAD/H box 1	291.958	0.681668	1.60399	0.308676	2.20836	0.0272193	0.104983	190.364	109.562	159.674	218.663	439.856	335.268	393.271	334.13	338.924	399.873
504698	TFRC	transferrin receptor	43.7493	-0.764079	0.588829	0.345461	-2.21176	0.026983	0.104983	58.2458	74.0701	54.9869	57.469	31.6943	58.3395	25.0448	31.0818	23.8306	22.7296
511959	ZNF596	zinc finger protein 596	414.194	-0.529398	0.692844	0.239695	-2.20863	0.0272005	0.104983	446.078	623.423	317.232	640.57	420.53	320.498	293.092	284.917	493.381	302.22
515738	ACP6	acid phosphatase 6, lysophosphatidic	60.1058	-0.708882	0.611794	0.321712	-2.20346	0.027562	0.105481	119.333	97.217	42.2976	61.6741	53.3393	33.9698	39.2594	43.1692	47.6611	63.1378
513678	CHEK1	checkpoint kinase 1	168.492	-0.481119	0.716422	0.218379	-2.20314	0.0275847	0.105481	173.317	225.296	243.211	213.056	128.323	170.588	144.854	132.961	107.679	145.638
783873	HOXB9	homeobox B9	336.316	-0.507733	0.703327	0.230382	-2.20388	0.027533	0.105481	384.991	530.835	409.229	403.685	247.37	278.405	267.37	365.212	282.436	193.623
614029	SREK1IP1	SREK1 interacting protein 1	264.908	-0.541523	0.687045	0.245595	-2.20495	0.0274579	0.105481	383.57	353.376	293.968	318.182	221.86	127.756	194.266	196.852	297.441	261.812
533109	TYW1	tRNA-yW synthesizing protein 1 homolog (S. cerevisiae)	326.075	-0.48692	0.713547	0.220837	-2.20489	0.0274622	0.105481	394.935	470.654	429.321	354.626	255.101	357.422	262.632	299.594	245.367	191.097
530316	UBXN2B	UBX domain protein 2B	129.812	-0.413074	0.751021	0.187521	-2.20281	0.0276082	0.105481	137.801	185.175	154.386	148.578	116.728	121.848	90.7028	120.01	105.031	117.857
540342	ZNF45	zinc finger protein 45	60.1423	-0.638841	0.642229	0.29001	-2.20283	0.027607	0.105481	71.0315	77.1563	93.0548	88.3061	37.8786	65.7243	46.7052	39.7157	40.6002	41.2501
768038	B3GALT4	beta-1,3-galactosyltransferase 4	203.452	-0.690761	0.619527	0.313695	-2.20202	0.0276642	0.105576	308.277	374.98	145.927	238.286	190.166	174.28	163.807	72.5243	147.396	218.878
281802	GRK7	G protein-coupled receptor kinase 7	37.1899	-0.72507	0.604968	0.32946	-2.20078	0.0277515	0.105791	46.8808	47.8369	54.9869	36.4438	44.8359	19.2003	16.9222	25.9015	49.4264	29.4643
613527	CTNS	cystinosin, lysosomal cystine transporter	65.0252	-0.680175	0.62409	0.309133	-2.20026	0.0277883	0.105813	65.349	115.734	94.1122	88.3061	37.8786	38.4007	50.7665	67.344	49.4264	42.9337
615823	FGF12	fibroblast growth factor 12	86.5299	0.840615	1.79081	0.382249	2.19913	0.0278685	0.105882	66.7696	33.9488	40.1827	54.6657	112.863	85.6631	126.578	64.7538	81.2004	198.674
614984	UTP6	UTP6, small subunit processome component	54.9041	0.760175	1.6937	0.345659	2.1992	0.0278634	0.105882	21.3095	26.2331	47.5848	47.6573	59.5235	49.4778	110.333	47.4862	66.196	73.2399
507319	EFNA1	ephrin A1	201.2	-0.802228	0.573463	0.364874	-2.19864	0.0279035	0.105896	319.642	379.609	214.66	239.688	126.004	124.064	115.071	77.7046	120.918	294.643
521876	CHRNA9	cholinergic receptor nicotinic alpha 9 subunit	80.1527	0.70737	1.63282	0.32199	2.19687	0.0280297	0.106257	51.1427	55.5525	54.9869	46.2556	95.083	86.4016	157.038	77.7046	121.801	55.5613
614194	CTU2	cytosolic thiouridylase subunit 2	326.215	-0.58651	0.665952	0.267532	-2.1923	0.0283582	0.107383	447.499	513.861	337.324	393.873	266.696	206.773	227.434	172.677	269.197	426.812
517811	COX15	cytochrome c oxidase assembly homolog COX15	31.5476	-0.754749	0.59265	0.344418	-2.19137	0.0284248	0.107516	58.2458	32.4057	47.5848	32.2387	27.8292	29.539	15.5684	18.1311	19.4175	34.5154
539186	GPR156	G protein-coupled receptor 156	62.101	0.574505	1.48917	0.262343	2.1899	0.0285316	0.1078	39.7776	35.4919	42.2976	58.8707	71.119	68.6782	75.8113	94.9723	75.9048	58.0868
529863	ACRV1	acrosomal vesicle protein 1	272.916	-0.390232	0.763007	0.178244	-2.18931	0.0285744	0.107842	319.642	328.686	336.266	276.132	287.568	240.004	246.387	252.972	281.554	159.949
535992	RAB11FIP5	RAB11 family interacting protein 5	74.8453	-0.59274	0.663082	0.270862	-2.18835	0.0286444	0.107987	90.9203	112.648	89.8824	93.9128	63.3887	58.3395	45.3514	37.1255	79.4352	77.4491
507966	CDC42EP2	CDC42 effector protein 2	64.4082	-0.618807	0.651209	0.282913	-2.18727	0.0287229	0.108068	71.0315	103.389	95.1696	78.4943	43.2898	65.7243	51.4434	35.3988	53.8394	46.3011
520598	PLIN1	perilipin 1	108.626	-0.64928	0.637598	0.296857	-2.18718	0.0287293	0.108068	152.007	188.261	129.008	140.168	55.6584	84.1861	96.7948	99.2892	79.4352	61.4542
506557	PBRM1	polybromo 1	105.321	0.600429	1.51617	0.274606	2.18651	0.0287784	0.108133	52.5633	58.6388	68.7336	105.126	131.416	155.08	136.054	126.918	105.031	113.648
520833	UBE4B	ubiquitination factor E4B	334.517	-0.615204	0.652837	0.281442	-2.1859	0.0288228	0.108181	440.395	487.628	432.493	473.769	190.939	297.605	226.757	386.796	229.48	179.311
509047	TTC4	tetratricopeptide repeat domain 4	25.0278	0.796829	1.73728	0.364675	2.18504	0.0288858	0.108298	14.2063	20.0606	8.45952	21.0253	27.0561	25.1081	30.4599	35.3988	43.2481	25.2551
511941	CEACAM19	carcinoembryonic antigen related cell adhesion molecule 19	49.0166	-0.764638	0.588601	0.350299	-2.18282	0.0290491	0.108791	42.6189	66.3544	113.146	29.4354	56.4314	40.6161	33.8443	47.4862	28.2436	31.9898
281408	PLAU	plasminogen activator, urokinase	34.8012	0.978221	1.97003	0.448328	2.18193	0.0291146	0.108916	19.8888	10.8019	8.45952	23.8286	52.5662	66.4627	51.4434	35.3988	37.0698	42.0919
508767	CPO	carboxypeptidase O	35.8509	0.687248	1.61021	0.315195	2.18039	0.0292285	0.109222	21.3095	21.6038	26.436	30.837	36.3325	64.9858	50.7665	31.0818	41.4828	33.6735
514427	SLC27A4	solute carrier family 27 member 4	72.3653	0.678896	1.60091	0.31173	2.17784	0.0294183	0.109811	49.7221	37.035	53.9295	35.0421	99.7212	74.586	106.271	76.8412	114.74	75.7654
526582	TTPAL	alpha tocopherol transfer protein like	557.271	-0.328611	0.796303	0.150943	-2.17705	0.0294767	0.109909	615.133	739.158	649.268	555.067	544.988	510.286	454.868	423.922	490.733	589.286
526127	FRMD4B	FERM domain containing 4B	183.62	0.62763	1.54502	0.288447	2.1759	0.0295631	0.10999	102.285	106.476	103.629	144.373	262.058	230.404	261.278	162.316	263.019	200.357
613899	UQCRH	ubiquinol-cytochrome c reductase hinge protein	48.1381	0.675107	1.59671	0.310215	2.17626	0.0295361	0.10999	24.1507	35.4919	22.2062	39.2471	62.6157	49.4778	67.0118	68.2074	58.2525	54.7195
508713	GNPTG	N-acetylglucosamine-1-phosphate transferase subunit gamma	88.7155	-0.64571	0.639178	0.29683	-2.17535	0.029604	0.110022	132.119	152.77	115.261	88.3061	54.1123	86.4016	61.5967	66.4806	82.9657	47.1429
768083	USHBP1	USH1 protein network component harmonin binding protein 1	70.9184	-0.689045	0.620264	0.317348	-2.17126	0.0299115	0.111044	95.1822	95.6738	111.031	92.5111	44.0629	78.2783	36.5519	70.7975	37.9524	47.1429
511508	PJA2	praja ring finger ubiquitin ligase 2	92.3209	0.633844	1.55169	0.29209	2.17003	0.0300045	0.111268	75.2934	58.6388	66.6187	57.469	102.04	55.3856	114.394	109.65	127.979	155.74
497017	CCR5	C-C motif chemokine receptor 5	65.1717	-0.855241	0.552773	0.394371	-2.16862	0.0301114	0.111543	107.968	101.846	112.089	70.0842	28.6022	78.2783	37.9057	43.1692	22.948	48.8266
767827	C1S	complement C1s	105.495	0.732679	1.66172	0.338215	2.16631	0.0302874	0.111952	53.984	40.1213	83.5378	100.921	115.955	90.8324	123.193	101.879	113.857	230.664
618204	SCN1B	sodium voltage-gated channel beta subunit 1	92.6232	-0.749723	0.594718	0.346034	-2.16662	0.0302642	0.111952	110.809	188.261	109.974	120.545	52.5662	109.294	58.8891	64.7538	73.2569	37.8827
505512	SAE1	SUMO1 activating enzyme subunit 1	29.6299	-0.94105	0.520854	0.434628	-2.16518	0.0303737	0.112149	55.4046	43.2075	50.7571	32.2387	13.9146	39.1392	14.2146	15.5409	15.887	15.9949
614025	RRP9	ribosomal RNA processing 9, U3 small nucleolar RNA binding protein	4456.41	-0.343595	0.788075	0.15888	-2.16261	0.0305714	0.112757	4357.07	4388.65	4724.64	6330	5122.12	4676.76	3208.44	3824.79	3821.72	4109.85
538226	SESN1	sestrin 1	923.802	-0.549718	0.683154	0.25433	-2.16144	0.0306615	0.112967	1197.59	1433.56	1060.61	1145.18	653.213	723.705	722.238	478.315	696.382	1127.22
531389	FOSL1	FOS like 1, AP-1 transcription factor subunit	329.279	-0.665207	0.630598	0.308126	-2.15888	0.0308596	0.113574	322.483	654.286	578.42	256.508	208.719	277.667	303.245	206.349	278.023	207.092
613679	AGPS	alkylglycerone phosphate synthase	167.069	-0.486985	0.713515	0.225702	-2.15764	0.0309557	0.113805	271.34	236.098	158.616	178.014	132.962	131.449	137.408	113.967	150.044	160.791
519271	ERC1	ELKS/RAB6-interacting/CAST family member 1	74.1311	-0.60073	0.65942	0.278545	-2.15668	0.0310309	0.113958	89.4997	143.511	91.9973	57.469	65.7078	70.1551	70.3962	46.6228	52.0742	53.8776
505393	TOMM40L	translocase of outer mitochondrial membrane 40 like	29.8035	0.679267	1.60133	0.315158	2.15532	0.0311367	0.114224	24.1507	20.0606	19.0339	19.6236	30.9213	35.4468	46.0283	46.6228	30.8915	25.2551
510218	ALPK2	alpha kinase 2	38.0573	0.706176	1.63147	0.327961	2.15323	0.0313004	0.114341	15.6269	26.2331	31.7232	29.4354	40.1977	40.6161	56.1816	46.6228	65.3134	28.6225
281701	CNGA3	cyclic nucleotide gated channel alpha 3	55.0043	0.761148	1.69484	0.353453	2.15346	0.0312824	0.114341	41.1983	16.9744	38.0679	36.4438	69.573	72.3705	94.7641	38.8523	62.6656	79.1328
516619	RABGGTA	Rab geranylgeranyltransferase subunit alpha	91.6545	-0.479041	0.717454	0.222479	-2.1532	0.0313028	0.114341	93.7616	114.191	142.754	72.8876	108.998	79.0168	69.0424	88.0652	83.8483	63.9797
282043	RPE65	RPE65, retinoid isomerohydrolase	106.177	0.669746	1.59079	0.310968	2.15375	0.0312599	0.114341	72.4521	44.7507	69.7911	89.7078	131.416	117.417	209.835	94.9723	107.679	123.75
508088	NDE1	nudE neurodevelopment protein 1	48.5218	0.691834	1.61534	0.321546	2.15159	0.0314299	0.114559	22.7301	32.4057	31.7232	39.2471	57.9775	43.57	90.0259	46.6228	66.196	54.7195
505106	USP14	ubiquitin specific peptidase 14	30.8274	0.761957	1.69579	0.354105	2.15178	0.0314145	0.114559	17.0476	13.8881	24.3211	14.0168	42.5168	36.1853	37.2288	42.3058	35.3045	45.4592
505158	ICAM5	intercellular adhesion molecule 5	187.096	-0.597087	0.661088	0.277625	-2.1507	0.0315002	0.114693	228.721	361.092	237.924	138.767	160.791	117.417	145.531	143.322	123.566	213.827
538944	CKMT2	creatine kinase, mitochondrial 2	23.8149	1.00257	2.00356	0.46639	2.14963	0.0315847	0.114878	9.94441	23.1469	14.8042	16.8202	14.6876	10.3386	25.7217	63.8905	33.5393	25.2551
327680	NDUFS4	NADH:ubiquinone oxidoreductase subunit S4	146.33	-0.417221	0.748865	0.194144	-2.14904	0.0316316	0.114915	157.69	200.606	132.18	186.424	160.791	93.0478	137.408	116.557	144.749	133.852
517795	TOMT	transmembrane O-methyltransferase	24.3462	0.946599	1.92732	0.440643	2.14822	0.0316961	0.114915	11.365	10.8019	14.8042	7.00842	37.1056	31.7544	41.967	22.448	30.0089	36.199
513775	ZBTB2	zinc finger and BTB domain containing 2	23.6224	0.989967	1.98614	0.46083	2.14823	0.0316959	0.114915	5.68252	12.345	11.6318	15.4185	32.4674	16.2464	43.3207	43.1692	26.4784	29.4643
510506	CPS1	carbamoyl-phosphate synthase 1	24.1786	0.750003	1.6818	0.349285	2.14725	0.0317731	0.115021	11.365	20.0606	12.6893	29.4354	17.0067	25.1081	25.0448	39.7157	34.4219	26.9388
282123	VLDLR	very low density lipoprotein receptor	69.5298	0.532253	1.44619	0.247905	2.147	0.0317929	0.115021	42.6189	43.2075	63.4464	64.4775	68.7999	79.0168	85.2877	64.7538	112.975	70.7144
539492	SIX2	SIX homeobox 2	90.8542	0.633737	1.55158	0.29528	2.14622	0.0318551	0.115124	69.6109	61.7251	64.5039	63.0758	95.8561	57.601	137.408	126.054	153.575	79.1328
NA	FAM212A	NA	32.0246	0.744822	1.67577	0.347166	2.14543	0.0319184	0.115231	19.8888	12.345	28.5509	18.2219	38.6516	39.1392	50.0896	40.5791	26.4784	46.3011
508965	C7H19orf25	chromosome 7 C19orf25 homolog	31.2695	0.711753	1.63779	0.331923	2.14433	0.0320066	0.115321	18.4682	23.1469	23.2637	29.4354	23.964	21.4158	34.5212	36.2622	44.1307	58.0868
282262	IGFBP4	insulin like growth factor binding protein 4	505.071	-0.746224	0.596162	0.348008	-2.14427	0.0320111	0.115321	646.387	890.384	821.631	576.092	231.137	662.412	388.533	262.469	274.493	297.169
529761	TMED10	transmembrane p24 trafficking protein 10	416.409	-0.380944	0.767935	0.17777	-2.14291	0.0321205	0.115593	505.744	512.318	443.068	507.41	388.062	329.36	316.783	298.731	376.876	485.74
407238	ESR1	estrogen receptor 1	128.617	-0.598352	0.660508	0.280004	-2.13694	0.0326025	0.116982	157.69	174.373	206.201	135.963	101.267	105.602	129.285	52.6665	91.7918	131.327
519904	GRM2	glutamate metabotropic receptor 2	203.827	-0.657805	0.633842	0.307837	-2.13686	0.0326095	0.116982	296.912	347.203	308.773	175.21	120.593	197.911	155.684	195.988	147.396	92.6022
614641	NUBPL	nucleotide binding protein like	60.4967	0.868366	1.82559	0.406244	2.13755	0.0325532	0.116982	41.1983	16.9744	29.6083	28.0337	95.8561	51.6932	102.21	80.2948	90.9092	68.1889
526515	ARMC4	armadillo repeat containing 4	342.724	-0.508072	0.703162	0.237949	-2.13521	0.0327439	0.117259	504.324	555.525	231.579	406.488	316.17	295.39	232.849	312.545	308.032	264.337
506836	NUP50	nucleoporin 50	97.14	-0.651185	0.636757	0.304995	-2.13507	0.0327554	0.117259	146.325	155.856	112.089	114.938	65.7078	115.202	65.658	81.1582	72.3743	42.0919
516122	CERCAM	cerebral endothelial cell adhesion molecule	76.9227	0.791932	1.73139	0.371134	2.13381	0.032858	0.117471	41.1983	29.3194	44.4125	53.264	111.317	76.8014	161.776	65.6172	97.9701	87.5511
515748	KIF23	kinesin family member 23	172.409	0.803397	1.74521	0.376711	2.13266	0.0329524	0.117471	78.1347	86.4151	102.572	92.5111	265.923	132.925	339.797	211.529	275.375	138.903
508832	LSP1	lymphocyte specific protein 1	127.358	-0.542134	0.686754	0.254189	-2.1328	0.0329414	0.117471	164.793	206.779	163.903	134.562	86.5797	115.202	92.0566	76.8412	102.383	130.485
524417	SLC41A2	solute carrier family 41 member 2	528.544	-0.494693	0.709713	0.231875	-2.13344	0.0328885	0.117471	742.99	861.064	430.378	679.817	379.559	434.223	384.472	449.823	483.672	439.439
538609	HEYL	hes related family bHLH transcription factor with YRPW motif-like	166.984	-0.509164	0.702629	0.238887	-2.1314	0.0330559	0.117716	204.571	291.651	150.157	171.005	164.656	92.3094	150.946	128.644	168.579	147.322
526376	STK10	serine/threonine kinase 10	55.649	0.863408	1.81933	0.405241	2.1306	0.0331219	0.117828	31.2539	20.0606	29.6083	21.0253	92.7639	58.3395	89.349	85.4751	68.8439	59.7705
100125601	TLCD1	TLC domain containing 1	45.3003	0.754757	1.68735	0.354344	2.13001	0.0331707	0.117879	32.6745	15.4313	29.6083	26.632	61.8426	44.3085	57.5354	80.2948	60.9003	43.7756
529876	WDR37	WD repeat domain 37	40.8317	0.855142	1.80894	0.401635	2.12915	0.0332416	0.118008	19.8888	16.9744	21.1488	22.4269	62.6157	31.7544	62.2736	44.0326	56.4873	70.7144
616246	ARHGAP15	Rho GTPase activating protein 15	35.9439	0.577025	1.49177	0.271072	2.12868	0.0332809	0.118024	35.5158	26.2331	23.2637	23.8286	34.7865	42.8315	38.5825	54.3932	37.0698	42.9337
517259	MICALL1	MICAL like 1	191.716	-0.60552	0.657234	0.284525	-2.12818	0.0333219	0.118047	275.602	300.91	242.154	222.868	116.728	222.281	106.948	176.13	130.627	122.908
100140553	GJB4	gap junction protein beta 4	278.109	0.462227	1.37767	0.217414	2.12602	0.0335012	0.118489	180.42	192.891	232.637	260.713	300.71	222.281	356.719	303.911	421.007	309.796
510458	SUSD2	sushi domain containing 2	427.06	-0.505123	0.7046	0.237611	-2.12585	0.0335161	0.118489	508.586	739.158	457.872	458.351	343.227	342.652	355.366	237.431	355.693	472.271
524343	EXOG	exo/endonuclease G	674.369	-0.44576	0.734198	0.209757	-2.12512	0.0335763	0.118578	754.355	965.997	893.537	769.524	507.11	608.503	640.335	590.555	624.008	389.771
614438	FAM171B	family with sequence similarity 171 member B	49.8945	0.736289	1.66589	0.346598	2.12433	0.0336425	0.118689	28.4126	20.0606	28.5509	49.0589	59.5235	64.9858	62.9505	82.8849	68.8439	33.6735
523250	SF3A3	splicing factor 3a subunit 3	100.532	0.412563	1.33105	0.194494	2.12121	0.0339043	0.119489	92.341	83.3288	108.916	70.0842	76.5302	127.756	116.425	119.147	116.505	94.2858
528990	RRP12	ribosomal RNA processing 12 homolog	585.46	-0.505022	0.704649	0.238387	-2.11849	0.0341333	0.11998	771.402	888.841	526.605	791.951	457.635	420.192	499.542	322.042	590.468	585.919
616640	TTC7A	tetratricopeptide repeat domain 7A	52.8152	0.610007	1.52627	0.28797	2.11831	0.0341492	0.11998	35.5158	27.7763	43.3551	37.8455	62.6157	56.8626	90.7028	66.4806	56.4873	50.5103
539762	ZFHX4	zinc finger homeobox 4	805.777	-0.669785	0.6286	0.316082	-2.11903	0.0340882	0.11998	1072.58	1205.18	1183.28	1023.23	464.593	965.187	569.262	722.653	562.225	289.592
531209	PLA2G4D	phospholipase A2 group IVD	155.875	0.648262	1.56728	0.306144	2.1175	0.0342172	0.120095	93.7616	91.0445	104.687	119.143	196.35	90.8324	228.788	175.267	256.841	202.041
509039	TCF12	transcription factor 12	163.579	0.603694	1.5196	0.285403	2.11523	0.0344103	0.120648	105.127	87.9582	127.95	147.177	179.344	104.863	274.816	159.726	221.536	227.296
508062	ZNF135	zinc finger protein 135	182.04	-0.366869	0.775464	0.173655	-2.11262	0.0346329	0.121304	230.142	248.443	173.42	187.826	187.074	135.141	165.837	147.639	157.988	186.888
618055	B4GAT1	beta-1,4-glucuronyltransferase 1	43.1952	0.552241	1.46636	0.261524	2.11163	0.0347186	0.121336	36.9364	32.4057	44.4125	33.6404	27.8292	56.1241	37.9057	47.4862	52.0742	63.1378
533174	SNX25	sorting nexin 25	26.2084	0.946394	1.92705	0.448257	2.11127	0.0347489	0.121336	17.0476	6.17251	13.7467	11.2135	39.4247	47.2624	39.2594	37.9889	24.7132	25.2551
536389	ZMYM5	zinc finger MYM-type containing 5	250.757	0.631048	1.54869	0.298873	2.11142	0.0347358	0.121336	166.214	137.338	130.065	172.407	374.921	219.327	325.583	269.376	385.702	326.633
511999	SHPK	sedoheptulokinase	60.4068	-0.691028	0.619413	0.327585	-2.10946	0.0349046	0.121699	102.285	74.0701	98.342	43.4522	54.8853	36.9237	47.3821	54.3932	67.0786	25.2551
788754	SMCO1	single-pass membrane protein with coiled-coil domains 1	2295.8	-0.528529	0.693261	0.250578	-2.10924	0.0349243	0.121699	2532.98	3641.78	1757.47	3338.81	2288.95	1986.5	1913.56	1056.78	2215.36	2225.82
787068	INSRR	insulin receptor related receptor	2676.25	-0.450856	0.731609	0.213808	-2.1087	0.0349708	0.121737	3315.75	3326.98	3490.61	3198.64	2125.07	3346.03	2101.73	1668.06	2073.26	2116.38
533187	BBX	BBX, HMG-box containing	74.4596	0.678702	1.6007	0.322044	2.10748	0.0350759	0.121791	46.8808	26.2331	59.2167	43.4522	107.452	88.617	103.564	78.568	98.8527	91.7603
281124	DPYD	dihydropyrimidine dehydrogenase	220.33	-0.468558	0.722686	0.222439	-2.10645	0.0351649	0.121791	282.705	296.28	207.258	318.182	176.251	161.726	155.007	194.262	163.284	248.342
529800	EPHB6	EPH receptor B6	114.649	0.559232	1.47348	0.265366	2.1074	0.035083	0.121791	68.1903	92.5876	76.1357	141.57	85.8066	155.818	141.469	140.732	165.049	79.1328
NA	INADL	NA	34.1336	1.07964	2.11352	0.512527	2.10651	0.0351598	0.121791	9.94441	9.25876	11.6318	23.8286	53.3393	61.2934	69.0424	49.2129	34.4219	19.3623
538697	STARD13	StAR related lipid transfer domain containing 13	76.8666	0.629144	1.54665	0.298669	2.10649	0.0351618	0.121791	29.8332	67.8976	41.2402	82.6994	79.6224	71.6321	106.271	115.694	98.8527	74.9236
541080	FUBP3	far upstream element binding protein 3	75.0546	0.565789	1.4802	0.26874	2.10534	0.0352619	0.122002	52.5633	33.9488	69.7911	50.4606	92.7639	72.3705	96.1179	94.9723	87.3787	100.179
535479	PCIF1	PDX1 C-terminal inhibiting factor 1	287.814	-0.558728	0.6789	0.265482	-2.10458	0.035328	0.122107	373.626	334.858	473.733	304.165	228.818	380.315	228.788	195.988	183.584	174.26
768075	RCL1	RNA terminal phosphate cyclase like 1	28.7989	0.706273	1.63158	0.335796	2.10328	0.0354416	0.122376	19.8888	10.8019	15.8616	26.632	34.7865	36.1853	41.967	31.0818	37.9524	32.8317
338058	ARF1	ADP ribosylation factor 1	131.289	-0.601192	0.659209	0.285907	-2.10276	0.0354869	0.122408	178.999	195.977	179.765	158.39	79.6224	152.126	87.9953	82.8849	75.9048	121.225
504727	RIPK1	receptor interacting serine/threonine kinase 1	623.677	-0.563482	0.676667	0.268086	-2.10187	0.0355647	0.122552	1071.16	989.144	592.167	513.016	555.038	393.607	370.934	713.156	577.229	461.327
507210	ALG1	ALG1, chitobiosyldiphosphodolichol beta-mannosyltransferase	112.683	-0.49459	0.709763	0.235584	-2.09942	0.0357801	0.12317	144.904	172.83	151.214	117.741	74.2111	98.2172	96.7948	85.4751	96.2049	89.2348
507533	CRCP	CGRP receptor component	112.203	-0.710008	0.611317	0.338304	-2.09872	0.0358412	0.123256	142.063	169.744	139.582	168.202	78.0763	155.818	80.5495	45.7594	53.8394	88.393
281017	ATRN	attractin	201.148	0.776493	1.71296	0.370274	2.09707	0.0359869	0.12326	107.968	52.4663	112.089	187.826	279.065	227.45	370.257	195.125	296.558	182.679
528033	CRLF3	cytokine receptor like factor 3	159.284	0.509205	1.42327	0.242687	2.0982	0.0358876	0.12326	99.4441	111.105	109.974	121.946	211.811	143.264	201.712	178.721	196.823	218.036
616627	HIST1H2BN	histone cluster 1, H2bk	37.0656	0.730618	1.65935	0.348331	2.09748	0.0359511	0.12326	19.8888	16.9744	35.953	21.0253	43.2898	30.2775	46.0283	67.344	50.309	39.5664
282356	SLC2A1	solute carrier family 2 member 1	368.203	-0.520974	0.696901	0.248398	-2.09733	0.0359641	0.12326	460.284	501.516	586.879	374.25	248.144	419.454	283.616	284.917	295.676	227.296
516094	CDC7	cell division cycle 7	86.3516	0.568801	1.48329	0.271467	2.09528	0.036146	0.123441	36.9364	61.7251	71.906	105.126	71.892	111.51	121.84	118.284	75.9048	88.393
513843	MLF2	myeloid leukemia factor 2	47.8198	0.810432	1.75374	0.386703	2.09575	0.0361046	0.123441	19.8888	15.4313	27.4935	54.6657	54.8853	35.4468	84.6108	52.6665	75.0222	58.0868
407209	SGCE	sarcoglycan epsilon	45.8188	-0.733493	0.601446	0.35021	-2.09444	0.0362211	0.123441	73.8728	77.1563	37.0104	60.2724	38.6516	28.062	28.4292	23.3114	29.1262	62.296
540781	TBCEL	tubulin folding cofactor E like	12343.4	-0.551386	0.682364	0.263236	-2.09464	0.0362027	0.123441	15169.5	23680.8	12481	12379.7	9659.82	6777.72	11329.1	7781.69	10826.1	13348.2
280939	TEK	TEK receptor tyrosine kinase	176.314	-0.464927	0.724508	0.221964	-2.09461	0.0362058	0.123441	286.967	191.348	143.812	228.474	173.159	169.111	124.547	126.918	140.336	178.47
613795	ZBTB8OS	zinc finger and BTB domain containing 8 opposite strand	219.6	-0.715851	0.608846	0.342152	-2.0922	0.0364205	0.123997	306.856	285.478	241.096	433.12	99.7212	259.943	124.547	184.764	135.04	125.434
550622	ATP6V0C	ATPase H+ transporting V0 subunit c	32.8759	-0.830919	0.562171	0.397246	-2.0917	0.0364656	0.124027	53.984	69.4407	32.7807	32.2387	23.191	36.9237	25.0448	10.3606	22.0653	22.7296
528169	PANX1	pannexin 1	354.744	-0.395391	0.760283	0.189591	-2.08549	0.0370247	0.125678	460.284	458.309	355.3	327.994	413.573	235.573	330.998	261.606	401.589	302.22
512135	TMEM179B	transmembrane protein 179B	3365.19	-0.394233	0.760894	0.189011	-2.08577	0.0369992	0.125678	2778.75	4772.89	4277.35	3372.45	3909.23	3272.92	3058.17	2782.69	3300.97	2126.48
533980	CKAP5	cytoskeleton associated protein 5	1188.7	-0.419911	0.747471	0.201495	-2.08398	0.0371621	0.126018	1449.04	1703.61	1119.83	1471.77	1059.83	844.815	921.92	819.352	1127.98	1368.83
535697	KRT7	keratin 7	30.8374	0.846297	1.79788	0.406336	2.08275	0.0372737	0.126146	12.7857	16.9744	16.919	16.8202	44.8359	33.2314	51.4434	22.448	43.2481	49.6684
516989	RALYL	RALY RNA binding protein like	101.643	-0.480141	0.716907	0.230519	-2.08287	0.0372629	0.126146	115.071	157.399	125.835	121.946	73.4381	90.0939	76.4882	69.0708	95.3223	91.7603
507111	CHD8	chromodomain helicase DNA binding protein 8	122.393	-0.757731	0.591426	0.364057	-2.08135	0.0374019	0.126454	129.277	296.28	94.1122	172.407	78.0763	80.4938	61.5967	145.912	71.4917	94.2858
511200	GMPS	guanine monophosphate synthase	788.97	-0.451102	0.731484	0.216933	-2.07945	0.0375762	0.126792	1022.85	1246.85	827.976	797.558	663.262	717.059	605.137	461.911	724.626	822.476
510193	LOC510193	apolipoprotein L, 3-like	49.0003	0.489382	1.40384	0.235334	2.07952	0.0375695	0.126792	36.9364	35.4919	47.5848	42.0505	40.9707	45.047	57.5354	69.9342	53.8394	60.6123
513445	TMEM98	transmembrane protein 98	31.1475	0.868873	1.82624	0.417936	2.07896	0.0376206	0.126816	24.1507	9.25876	14.8042	21.0253	39.4247	31.0159	31.8137	72.5243	38.835	28.6225
506682	FLAD1	flavin adenine dinucleotide synthetase 1	28.6374	-0.69096	0.619441	0.332645	-2.07717	0.0377857	0.127078	58.2458	30.8625	30.6658	30.837	27.0561	27.3236	23.0141	17.2677	15.0044	26.097
514898	P2RX1	purinergic receptor P2X 1	303.123	-0.493615	0.710243	0.237605	-2.07747	0.0377586	0.127078	429.03	425.903	273.877	326.592	318.49	303.513	299.184	206.349	300.971	147.322
529375	RASGRP4	RAS guanyl releasing protein 4	503.182	-0.36508	0.776426	0.175781	-2.07691	0.03781	0.127078	605.188	703.666	450.47	626.553	449.132	360.376	435.915	470.545	450.133	479.848
505853	FAM168B	family with sequence similarity 168 member B	42.1013	-0.695852	0.617344	0.335517	-2.07397	0.038082	0.12774	62.5077	58.6388	54.9869	54.6657	30.1483	35.4468	22.3373	17.2677	36.1872	48.8266
510274	PCYT2	phosphate cytidylyltransferase 2, ethanolamine	361.567	0.342481	1.26793	0.165132	2.07398	0.0380815	0.12774	301.174	265.418	351.07	318.182	355.595	347.822	342.505	404.064	428.95	500.894
536421	CYLD	CYLD lysine 63 deubiquitinase	26.4789	0.867715	1.82477	0.418666	2.07257	0.0382122	0.12805	18.4682	15.4313	6.34464	16.8202	35.5595	23.6312	41.967	28.4917	31.7741	46.3011
732539	SARNP	SAP domain containing ribonucleoprotein	80.7685	0.818128	1.76312	0.395172	2.07031	0.0384232	0.128631	34.0951	30.8625	54.9869	46.2556	123.685	61.2934	167.868	93.2455	111.209	84.1838
615879	EFNA4	ephrin A4	331.274	-0.498614	0.707786	0.241215	-2.06709	0.0387254	0.129388	465.967	523.12	297.141	363.036	292.206	193.48	306.63	232.25	254.193	384.72
NA	SEPN1	NA	153.551	0.485777	1.40034	0.234974	2.06736	0.0387001	0.129388	130.698	106.476	120.548	149.98	132.189	173.542	248.417	184.764	185.349	103.546
359716	DNMT3A	DNA methyltransferase 3 alpha	543.876	-0.354475	0.782154	0.171642	-2.0652	0.0389041	0.129747	652.069	716.011	547.754	647.578	490.103	352.991	467.729	518.031	530.451	516.047
527312	NSMCE4A	NSE4 homolog A, SMC5-SMC6 complex component	42.5548	0.811524	1.75506	0.392961	2.06515	0.0389087	0.129747	11.365	12.345	45.4699	42.0505	41.7438	53.9087	68.3656	66.4806	46.7785	37.0409
533131	MARVELD3	MARVEL domain containing 3	50.8621	0.873184	1.8317	0.423223	2.06318	0.0390959	0.130243	18.4682	21.6038	20.0914	32.2387	85.0336	79.7553	84.6108	46.6228	68.8439	51.3521
540945	DEK	DEK proto-oncogene	46.3313	0.582132	1.49706	0.28221	2.06276	0.0391355	0.130248	25.5713	55.5525	39.1253	25.2303	40.1977	61.2934	64.9811	43.1692	45.8959	62.296
514863	MCMBP	minichromosome maintenance complex binding protein	242.722	-0.461761	0.726099	0.223935	-2.06203	0.0392049	0.130352	362.261	188.261	302.428	301.362	252.009	238.527	187.498	145.912	187.997	260.97
505351	NUCB1	nucleobindin 1	34.0126	-0.830777	0.562227	0.403138	-2.06078	0.0393245	0.130622	72.4521	60.1819	25.3786	39.2471	21.6449	39.8776	21.6604	19.8578	23.8306	15.9949
527153	UBR2	ubiquitin protein ligase E3 component n-recognin 2	301.536	-0.486148	0.713929	0.235999	-2.05996	0.0394027	0.130754	421.927	379.609	367.989	374.25	217.222	372.93	195.62	221.89	238.306	225.613
280712	ADA	adenosine deaminase	44.4878	-0.564929	0.675989	0.27448	-2.05818	0.0395731	0.130839	56.8252	37.035	62.389	71.4859	37.8786	31.7544	30.4599	38.8523	34.4219	43.7756
515605	APPL2	adaptor protein, phosphotyrosine interacting with PH domain and leucine zipper 2	424.295	0.483277	1.39792	0.234819	2.05809	0.0395818	0.130839	254.293	296.28	342.611	315.379	557.357	357.422	526.618	520.621	598.412	473.955
506544	PFKM	phosphofructokinase, muscle	72.8469	0.69746	1.62165	0.338716	2.05913	0.039482	0.130839	48.3014	37.035	37.0104	43.4522	109.771	79.0168	125.901	70.7975	99.7353	77.4491
282041	ROCK2	Rho associated coiled-coil containing protein kinase 2	1042.31	-0.452896	0.730575	0.220014	-2.05849	0.0395431	0.130839	1341.07	1589.42	959.098	1143.77	991.028	554.595	1016.01	775.319	1065.31	987.476
512525	MICU2	mitochondrial calcium uptake 2	91.0801	-0.582193	0.667948	0.282942	-2.05765	0.0396242	0.130852	107.968	179.003	74.0208	103.725	82.7145	95.2633	51.4434	61.3003	82.9657	72.3981
NA	LOC523427	NA	163.97	-0.417381	0.748783	0.203067	-2.05539	0.0398416	0.131442	205.991	214.495	187.167	210.253	122.139	158.034	140.792	129.508	114.74	156.582
533643	ZNF326	zinc finger protein 326	36.1259	0.758646	1.6919	0.369439	2.05351	0.040023	0.131913	18.4682	35.4919	22.2062	11.2135	45.6089	48.0009	58.2123	41.4425	50.309	30.3062
787450	ALOX12E	arachidonate lipoxygenase, epidermal	165.039	-0.390425	0.762905	0.190292	-2.05171	0.0401976	0.132282	227.301	211.408	180.822	185.022	133.735	158.034	124.547	141.595	127.979	159.949
100140639	RAD54L	RAD54 like	48.1847	0.544395	1.45841	0.265356	2.05156	0.0402124	0.132282	31.2539	38.5782	35.953	36.4438	52.5662	73.8475	57.5354	44.896	65.3134	45.4592
540080	CYP24A1	cytochrome P450, family 24, subfamily A, polypeptide 1	99.5946	-0.535641	0.689852	0.261304	-2.04988	0.0403765	0.132694	161.952	97.217	121.606	124.75	85.0336	104.863	85.9646	77.7046	46.7785	90.0766
505015	GPR137	G protein-coupled receptor 137	90.3865	0.603855	1.51977	0.294646	2.04942	0.0404207	0.132711	56.8252	37.035	104.687	85.5027	73.4381	99.6941	140.116	117.42	121.801	67.347
524771	LOC524771	uncharacterized LOC524771	143.701	0.495889	1.41019	0.242025	2.04892	0.0404704	0.132746	99.4441	94.1307	104.687	127.553	168.521	176.495	184.113	111.377	151.81	218.878
353353	TRDMT1	tRNA aspartic acid methyltransferase 1	83.701	0.472504	1.38752	0.230657	2.04852	0.0405093	0.132746	66.7696	72.5269	53.9295	65.8791	90.4448	98.9556	97.4717	90.6554	127.979	72.3981
507122	CDC45	cell division cycle 45	223.185	-0.639075	0.642125	0.312298	-2.04636	0.0407211	0.133184	306.856	328.686	314.06	260.713	149.968	321.237	132.67	120.874	173.875	122.908
100125318	IK	IK cytokine	67.3409	0.528584	1.44251	0.25826	2.04672	0.0406861	0.133184	48.3014	66.3544	61.3315	28.0337	70.346	68.6782	89.349	75.1145	74.1395	91.7603
513821	FBXL22	F-box and leucine rich repeat protein 22	78.6736	0.6869	1.60982	0.335955	2.04462	0.0408924	0.133616	44.0395	30.8625	57.1018	65.8791	101.267	48.7393	107.625	109.65	112.975	108.597
508158	AHCY	adenosylhomocysteinase	49.4999	0.566765	1.4812	0.277779	2.04034	0.041316	0.134276	38.357	30.8625	42.2976	44.8539	42.5168	36.1853	68.3656	58.7102	51.1916	81.6583
533620	ANKRD26	ankyrin repeat domain 26	234.742	0.746473	1.67769	0.366166	2.03862	0.0414883	0.134276	136.381	75.6132	112.089	162.595	387.289	273.236	389.887	269.376	320.389	220.562
785713	ATP8B2	ATPase phospholipid transporting 8B2	149.867	0.641041	1.55945	0.314165	2.04046	0.0413045	0.134276	120.754	67.8976	85.6527	88.3061	220.314	129.972	230.141	157.136	188.879	209.618
338056	CD163L1	CD163 molecule-like 1	58.4266	0.522099	1.43604	0.256154	2.03822	0.0415278	0.134276	44.0395	46.2938	46.5274	60.2724	43.2898	59.8165	83.934	76.8412	80.3178	42.9337
281691	DNAJC14	DnaJ heat shock protein family (Hsp40) member C14	144.055	0.575695	1.4904	0.281914	2.0421	0.041142	0.134276	86.6584	72.5269	138.525	82.6994	194.804	169.111	221.342	149.366	157.988	167.526
514772	GPN2	GPN-loop GTPase 2	321.913	-0.541476	0.687068	0.265465	-2.03973	0.0413773	0.134276	402.038	575.586	352.128	391.07	189.393	345.606	216.604	240.021	234.775	271.914
515398	PCSK7	proprotein convertase subtilisin/kexin type 7	61.2648	-0.603647	0.658088	0.296014	-2.03925	0.0414252	0.134276	69.6109	100.303	97.2845	64.4775	38.6516	59.078	35.1981	50.0763	43.2481	54.7195
535312	PIAS3	protein inhibitor of activated STAT 3	61.6405	0.758575	1.69182	0.371576	2.04151	0.0412002	0.134276	31.2539	29.3194	34.8955	39.2471	91.9909	51.6932	102.21	80.2948	104.148	51.3521
615857	PRR11	proline rich 11	298.569	0.321036	1.24923	0.157485	2.03851	0.0414986	0.134276	238.666	245.357	283.394	227.073	329.312	307.944	337.09	371.255	344.219	301.378
506648	SLC47A2	solute carrier family 47 member 2	36.5705	-0.65261	0.636129	0.319984	-2.03951	0.0413993	0.134276	46.8808	74.0701	34.8955	36.4438	32.4674	36.9237	26.3986	33.672	22.0653	21.8878
513699	TMEM205	transmembrane protein 205	61.895	-0.577529	0.67011	0.283248	-2.03895	0.0414551	0.134276	69.6109	95.6738	100.457	68.6825	37.1056	49.4778	45.3514	44.0326	53.8394	54.7195
535603	ADCY3	adenylate cyclase 3	461.877	-0.631893	0.645329	0.310285	-2.03649	0.0417011	0.134708	612.292	990.687	472.676	434.522	298.391	335.268	285.646	270.239	359.224	559.822
540840	DTWD1	DTW domain containing 1	138.907	-0.480809	0.716576	0.236165	-2.03591	0.0417598	0.13477	164.793	220.667	142.754	179.416	103.586	119.633	113.04	82.0215	138.57	124.592
505472	PYGL	glycogen phosphorylase L	328.349	-0.553781	0.681232	0.272335	-2.03345	0.0420067	0.135439	500.062	570.957	330.979	332.199	220.314	211.204	222.019	227.07	297.441	371.25
506840	CEP95	centrosomal protein 95	95.2429	-0.398568	0.758611	0.196238	-2.03105	0.0422504	0.136096	129.277	83.3288	113.146	121.946	94.31	93.7863	75.1344	71.6609	86.4961	83.3419
282120	VDAC2	voltage dependent anion channel 2	60.7425	0.681462	1.60376	0.335722	2.02984	0.0423729	0.136362	29.8332	29.3194	44.4125	49.0589	78.8493	70.8936	119.132	69.0708	51.1916	65.6634
540675	KALRN	kalirin RhoGEF kinase	32.4908	0.75292	1.6852	0.371528	2.02655	0.0427084	0.137269	14.2063	33.9488	28.5509	16.8202	27.0561	33.2314	39.2594	72.5243	26.4784	32.8317
614102	MRPS18A	mitochondrial ribosomal protein S18A	45.5146	-0.600163	0.659679	0.296189	-2.02629	0.0427355	0.137269	61.0871	75.6132	50.7571	46.2556	41.7438	50.9548	37.9057	22.448	40.6002	27.7806
509897	MTHFSD	methenyltetrahydrofolate synthetase domain containing	43.6254	-0.695298	0.617582	0.34339	-2.02481	0.042887	0.137552	62.5077	50.9232	60.2741	71.4859	25.5101	50.2163	28.4292	19.8578	30.0089	37.0409
281958	OPRM1	opioid receptor mu 1	125.692	-0.483026	0.715475	0.238574	-2.02464	0.0429042	0.137552	161.952	216.038	127.95	138.767	90.4448	101.91	123.193	90.6554	104.148	101.862
540423	MPZL2	myelin protein zero like 2	51.302	0.857544	1.81195	0.423868	2.02314	0.043059	0.137918	18.4682	24.69	29.6083	18.2219	88.8988	62.0319	87.9953	51.8031	72.3743	58.9286
530393	PKD2	polycystin 2, transient receptor potential cation channel	45.0437	-0.781014	0.581957	0.38655	-2.02048	0.043334	0.138669	56.8252	120.364	45.4699	39.2471	23.964	29.539	29.1061	37.9889	30.8915	37.0409
513908	IFT52	intraflagellar transport 52	46.998	0.643432	1.56204	0.318626	2.0194	0.043446	0.138897	34.0951	23.1469	51.8146	29.4354	43.2898	31.7544	60.9198	67.344	77.67	50.5103
514150	INTS5	integrator complex subunit 5	88.257	0.776411	1.71286	0.384958	2.01687	0.043709	0.139607	56.8252	52.4663	66.6187	32.2387	115.182	45.047	123.193	117.42	181.818	91.7603
613556	SLC2A13	solute carrier family 2 member 13	102.823	-0.470484	0.721722	0.233337	-2.01633	0.0437655	0.139656	146.325	163.571	91.9973	100.921	95.8561	67.9397	89.349	89.792	105.031	77.4491
509463	ATCAY	ATCAY, caytaxin	96.9865	0.731787	1.6607	0.363143	2.01515	0.0438888	0.139919	58.2458	61.7251	35.953	63.0758	143.784	99.6941	165.16	69.0708	154.457	118.699
540959	CRTC2	CREB regulated transcription coactivator 2	525.356	-0.674718	0.626455	0.335075	-2.01363	0.0440483	0.140296	663.434	802.426	822.689	643.373	299.164	769.491	273.462	395.43	324.802	259.286
532824	EEFSEC	eukaryotic elongation factor, selenocysteine-tRNA specific	59.8826	-0.789351	0.578604	0.392317	-2.01202	0.0442176	0.140668	69.6109	70.9838	122.663	64.4775	51.7932	81.9707	32.4906	54.3932	16.7697	33.6735
517192	JUND	JunD proto-oncogene, AP-1 transcription factor subunit	553.31	-0.4459	0.734126	0.221657	-2.01167	0.0442545	0.140668	689.006	785.451	720.117	490.589	506.336	433.485	443.361	342.764	433.363	688.623
281343	MYOG	myogenin	275.991	-0.338446	0.790893	0.168269	-2.01135	0.0442889	0.140668	340.951	341.031	288.681	330.797	241.959	271.02	229.465	194.262	269.197	252.551
783869	GTF3C5	general transcription factor IIIC subunit 5	236.588	-0.405294	0.755082	0.201557	-2.01081	0.0443451	0.140669	285.547	344.117	309.83	239.688	170.84	206.773	201.035	189.945	194.175	223.929
507839	PRMT2	protein arginine methyltransferase 2	108.712	-0.45979	0.727092	0.228687	-2.01056	0.0443719	0.140669	149.166	143.511	117.376	138.767	82.7145	107.817	90.0259	82.0215	67.9612	107.755
407229	ADAM12	ADAM metallopeptidase domain 12	24.1398	-0.764706	0.588573	0.381028	-2.00695	0.0447546	0.141683	34.0951	43.2075	30.6658	23.8286	20.8719	19.9388	18.2759	22.448	6.17829	21.8878
512902	CRAT	carnitine O-acetyltransferase	127.063	-0.392323	0.761902	0.195596	-2.00578	0.0448797	0.141683	132.119	183.632	154.386	123.348	128.323	83.4477	119.809	102.743	117.388	125.434
281095	CSF2	colony stimulating factor 2	94.4653	0.43681	1.35361	0.217845	2.00514	0.0449477	0.141683	93.7616	74.0701	75.0783	58.8707	98.1752	82.7092	115.748	101.016	114.74	130.485
509425	EFTUD2	elongation factor Tu GTP binding domain containing 2	142.474	-0.766582	0.587808	0.382388	-2.00472	0.0449927	0.141683	252.872	183.632	190.339	207.449	64.1617	207.511	85.2877	96.6991	63.5482	73.2399
615679	FLOT2	flotillin 2	41.7391	0.619766	1.53663	0.309318	2.00365	0.0451073	0.141683	32.6745	33.9488	21.1488	30.837	45.6089	49.4778	75.8113	37.1255	51.1916	39.5664
513412	JAM3	junctional adhesion molecule 3	99.9334	0.689433	1.61265	0.344034	2.00397	0.0450734	0.141683	45.4602	38.5782	89.8824	67.2808	138.373	86.4016	119.809	165.77	151.81	95.9695
100498838	MIR193A-2	microRNA 193a-2	66.0886	-0.596793	0.661222	0.29777	-2.00421	0.0450475	0.141683	95.1822	118.821	63.4464	77.0926	44.8359	50.2163	47.3821	44.896	43.2481	75.7654
519463	NEDD1	neural precursor cell expressed, developmentally down-regulated 1	3051.24	-0.414835	0.750105	0.207004	-2.00399	0.0450706	0.141683	4033.17	4309.95	2735.6	3962.56	2395.63	2222.07	2476.73	2264.66	2721.1	3390.92
282704	TBC1D1	TBC1 domain family member 1	44.1648	0.866608	1.82337	0.432497	2.00373	0.0450989	0.141683	38.357	10.8019	56.0443	16.8202	33.2404	36.9237	62.9505	83.7483	74.1395	28.6225
369019	XRRA1	X-ray radiation resistance associated 1	64.0982	0.815152	1.75948	0.406337	2.0061	0.0448457	0.141683	45.4602	15.4313	30.6658	36.4438	102.04	70.1551	112.363	75.9778	92.6744	59.7705
338036	P2RX4	purinergic receptor P2X 4	73.0086	-0.697816	0.616505	0.348424	-2.00278	0.0452014	0.141848	95.1822	137.338	107.859	51.8623	60.2966	84.9246	60.9198	55.2566	51.1916	25.2551
538392	CDC42BPA	CDC42 binding protein kinase alpha	139.703	0.670216	1.59131	0.334782	2.00195	0.0452903	0.141996	92.341	57.0957	77.1932	92.5111	217.222	133.664	199.682	126.054	194.175	207.092
NA	NRD1	NA	113.724	0.707649	1.63314	0.353562	2.00149	0.0453401	0.142021	62.5077	50.9232	50.7571	89.7078	175.478	96.0017	129.285	141.595	201.236	139.745
510355	PLSCR3	phospholipid scramblase 3	36.4165	0.61486	1.53141	0.307732	1.99804	0.0457124	0.143056	19.8888	32.4057	31.7232	29.4354	30.1483	26.5851	54.8278	45.7594	35.3045	58.0868
531420	GP2	glycoprotein 2	455.749	-0.351171	0.783947	0.1759	-1.99642	0.045888	0.143474	448.919	584.845	557.271	601.322	364.098	349.299	393.271	455.004	390.115	413.342
514094	ZSWIM7	zinc finger SWIM-type containing 7	205.541	-0.394958	0.760512	0.19794	-1.99534	0.046006	0.143711	242.928	248.443	268.59	229.876	179.344	220.066	206.45	161.453	169.462	128.801
512930	PQLC2	PQ loop repeat containing 2	165.578	0.534183	1.44812	0.26827	1.99122	0.0464569	0.144986	115.071	141.968	116.318	107.93	193.258	107.079	199.005	255.562	244.484	175.102
533338	BCL2L12	BCL2 like 12	480.114	-0.532667	0.691276	0.267806	-1.98901	0.0467005	0.145298	613.712	766.934	613.315	445.735	400.431	632.873	349.95	241.748	397.176	339.261
788008	C18H16orf86	chromosome 18 C16orf86 homolog	185.319	0.397714	1.31742	0.199981	1.98876	0.0467274	0.145298	125.015	166.658	189.282	142.972	174.705	290.221	199.682	197.715	180.053	186.888
282644	ITGB6	integrin subunit beta 6	37.081	0.648752	1.56781	0.326093	1.98947	0.0466497	0.145298	25.5713	29.3194	16.919	29.4354	42.5168	39.8776	61.5967	45.7594	51.1916	28.6225
614507	RAB15	RAB15, member RAS oncogene family	176.935	-0.797167	0.575478	0.400784	-1.98902	0.0466991	0.145298	225.88	271.59	249.556	302.764	74.2111	256.251	79.1957	145.912	87.3787	76.6072
615847	SKA2	spindle and kinetochore associated complex subunit 2	128.574	0.56467	1.47905	0.28399	1.98835	0.0467735	0.145309	86.6584	57.0957	108.916	99.5196	163.883	112.248	212.542	126.054	158.87	159.949
516853	IGF2BP1	insulin like growth factor 2 mRNA binding protein 1	102.421	0.497634	1.4119	0.250365	1.98763	0.0468524	0.145422	72.4521	58.6388	99.3994	102.323	91.2179	138.833	165.837	103.606	108.561	83.3419
517425	SLC25A45	solute carrier family 25 member 45	119.442	-0.514474	0.700048	0.25891	-1.98708	0.0469134	0.145478	150.587	203.693	126.893	137.365	85.8066	105.602	92.7335	64.7538	120.918	106.072
541270	WDR33	WD repeat domain 33	122.475	-0.575307	0.671143	0.289674	-1.98605	0.0470281	0.145702	178.999	222.21	145.927	106.528	80.3954	93.7863	71.0731	96.6991	94.4396	134.694
100138748	THOC1	THO complex 1	32.9393	0.665469	1.58608	0.33524	1.98506	0.0471383	0.14591	17.0476	13.8881	22.2062	28.0337	44.0629	42.0931	39.9363	41.4425	33.5393	47.1429
527553	CRP	C-reactive protein	961.451	-0.410444	0.752392	0.206902	-1.98376	0.0472827	0.146225	1183.39	1413.5	936.892	1129.76	824.826	736.259	768.266	613.866	892.322	1115.44
537748	DYNC1H1	dynein cytoplasmic 1 heavy chain 1	1308.1	-0.426111	0.744265	0.215052	-1.98143	0.0475429	0.146896	1754.48	1856.38	1681.33	1355.43	854.201	1310.79	1175.75	929.002	1114.74	1048.93
523204	ZNF341	zinc finger protein 341	58.2405	0.601932	1.51775	0.303875	1.98086	0.0476073	0.146962	22.7301	47.8369	41.2402	39.2471	78.0763	56.8626	80.5495	75.9778	75.9048	63.9797
522221	TTLL7	tubulin tyrosine ligase like 7	204.93	-0.461877	0.726041	0.233251	-1.98017	0.0476841	0.147066	289.809	296.28	150.157	263.517	189.393	206.034	145.531	132.098	186.231	190.255
781854	FBXO10	F-box protein 10	245.27	-0.378464	0.769256	0.191267	-1.97872	0.0478474	0.147333	264.237	294.737	233.694	370.045	225.726	255.512	210.512	177.857	188.879	231.505
541460	KCNS3	potassium voltage-gated channel modifier subfamily S member 3	23.6244	0.686145	1.60898	0.346846	1.97824	0.0479014	0.147333	14.2063	16.9744	17.9765	16.8202	23.964	41.3546	35.875	25.0382	23.8306	20.2041
NA	PYCRL	NA	160.446	-0.436589	0.73888	0.220718	-1.97804	0.0479244	0.147333	198.888	243.814	180.822	161.194	139.146	113.725	127.255	189.081	138.57	111.964
515399	STAG3	stromal antigen 3	55.6507	-0.641749	0.640936	0.324465	-1.97787	0.0479436	0.147333	68.1903	111.105	65.5613	47.6573	47.155	32.4929	33.8443	33.672	68.8439	47.9848
520094	EIF2S2	eukaryotic translation initiation factor 2 subunit beta	92.4884	-0.419473	0.747698	0.212189	-1.97689	0.0480545	0.147408	95.1822	115.734	112.089	135.963	71.892	77.5399	81.9033	70.7975	82.9657	80.8164
526637	SPINK5	serine peptidase inhibitor, Kazal type 5	54.8799	-0.508749	0.702832	0.257341	-1.97694	0.0480483	0.147408	68.1903	50.9232	72.9634	61.6741	68.0269	51.6932	43.3207	64.7538	34.4219	32.8317
281962	OVGP1	oviductal glycoprotein 1	34.8505	0.773094	1.70893	0.391361	1.9754	0.0482229	0.147791	12.7857	15.4313	17.9765	33.6404	47.155	48.7393	39.2594	26.7649	51.1916	55.5613
533968	CNOT1	CCR4-NOT transcription complex subunit 1	32.4883	0.60971	1.52595	0.308983	1.97328	0.0484641	0.148397	18.4682	21.6038	23.2637	30.837	33.2404	26.5851	34.5212	52.6665	44.1307	39.5664
100124518	ZNF420	zinc finger protein 420	23.7205	-0.736755	0.600087	0.373699	-1.97152	0.0486642	0.148876	14.2063	40.1213	31.7232	39.2471	23.191	22.8927	12.184	13.8142	23.8306	15.9949
530186	PSMC2	proteasome 26S subunit, ATPase 2	26.8257	0.891239	1.85477	0.452295	1.97048	0.0487829	0.149105	14.2063	12.345	9.51696	15.4185	40.9707	24.3697	58.8891	28.4917	37.9524	26.097
282088	TACR2	tachykinin receptor 2	65.0588	-0.719898	0.60714	0.365455	-1.96987	0.0488534	0.149187	139.222	70.9838	84.5952	68.6825	41.7438	45.7854	37.2288	68.2074	69.7265	24.4133
100140477	KLF12	Kruppel like factor 12	43.5531	0.715248	1.64177	0.363335	1.96857	0.049003	0.14949	17.0476	13.8881	34.8955	50.4606	47.155	62.0319	48.7358	55.2566	36.1872	69.8725
513924	PSTPIP1	proline-serine-threonine phosphatase interacting protein 1	26.9697	0.89831	1.86388	0.45658	1.96748	0.0491282	0.14949	9.94441	6.17251	16.919	22.4269	37.1056	20.6773	58.2123	35.3988	30.0089	32.8317
513554	SOAT2	sterol O-acyltransferase 2	267.063	-0.409097	0.753095	0.207919	-1.96758	0.0491167	0.14949	331.007	402.756	328.864	278.935	183.982	225.973	219.311	212.393	236.54	250.868
767999	WDR26	WD repeat domain 26	30.141	1.05338	2.07539	0.535316	1.96778	0.0490931	0.14949	9.94441	3.08625	7.40208	28.0337	47.928	44.3085	33.1674	54.3932	34.4219	38.7245
NA	ERBB2IP	NA	24.7155	0.861543	1.81698	0.438008	1.96696	0.0491882	0.149539	12.7857	9.25876	10.5744	19.6236	34.0134	25.1081	30.4599	38.8523	17.6523	48.8266
538970	C4H7orf25	chromosome 4 C7orf25 homolog	33.5623	0.66178	1.58203	0.336603	1.96605	0.0492923	0.149722	18.4682	23.1469	31.7232	19.6236	35.5595	22.1542	50.7665	45.7594	37.0698	51.3521
508374	QTRTD1	NA	299.721	-0.550488	0.682789	0.28015	-1.96498	0.0494169	0.149967	359.419	438.248	358.472	363.036	262.831	261.42	217.958	134.688	183.584	417.552
510689	NAIF1	nuclear apoptosis inducing factor 1	129.5	0.559772	1.47404	0.285066	1.96366	0.0495695	0.150296	106.547	66.3544	102.572	67.2808	177.798	127.756	184.79	123.464	182.701	155.74
615868	FN3KRP	fructosamine 3 kinase related protein	54.2931	0.784467	1.72246	0.399611	1.96308	0.0496374	0.150368	38.357	26.2331	31.7232	37.8455	64.1617	63.5088	79.1957	23.3114	57.3699	121.225
524280	NBEAL1	neurobeachin like 1	700.798	0.367868	1.29044	0.187508	1.96188	0.0497766	0.150431	551.205	496.887	499.112	625.151	884.35	830.046	890.106	735.604	737.865	757.654
510157	SLC12A5	solute carrier family 12 member 5	251.031	-0.429571	0.742483	0.218893	-1.96247	0.049708	0.150431	322.483	370.35	293.968	246.696	208.719	192.742	219.988	152.819	218.006	284.541
533257	TMOD3	tropomodulin 3	38.3883	0.725275	1.65322	0.369707	1.96176	0.0497906	0.150431	21.3095	13.8881	27.4935	26.632	53.3393	52.4317	64.9811	45.7594	49.4264	28.6225
538625	PSMD6	proteasome 26S subunit, non-ATPase 6	26.812	0.768838	1.7039	0.392049	1.96108	0.0498702	0.150538	22.7301	16.9744	8.45952	23.8286	27.0561	28.8005	47.3821	29.3551	45.0133	18.5204
506401	GLTSCR2	NA	58.4427	-0.609663	0.65535	0.311114	-1.95961	0.0500415	0.150922	76.714	97.217	85.6527	51.8623	42.5168	59.8165	41.2901	63.0271	32.6567	33.6735
539321	SERTAD1	SERTA domain containing 1	353.358	-0.452663	0.730693	0.231063	-1.95905	0.0501072	0.150986	396.356	445.964	535.065	405.087	260.512	412.069	296.476	230.524	312.445	239.082
533746	DPYSL2	dihydropyrimidinase like 2	24.2997	1.08915	2.12749	0.556247	1.95804	0.0502255	0.151075	11.365	1.54313	11.6318	30.837	21.6449	19.2003	11.5071	45.7594	42.3655	47.1429
NA	KIAA0430	NA	179.974	0.542544	1.45654	0.277085	1.95804	0.0502254	0.151075	123.595	98.7601	149.099	116.34	241.959	165.418	272.785	151.092	255.075	225.613
282132	ADAM10	ADAM metallopeptidase domain 10	35.4185	0.576019	1.49073	0.294303	1.95723	0.0503203	0.151227	22.7301	26.2331	19.0339	32.2387	40.9707	48.7393	43.3207	47.4862	40.6002	32.8317
777592	FAM229B	family with sequence similarity 229 member B	159.75	-0.492257	0.710912	0.251646	-1.95615	0.0504476	0.151476	196.047	219.124	149.099	245.295	126.004	168.372	134.024	107.06	162.401	90.0766
789044	DNAH2	dynein axonemal heavy chain 2	1377.65	-0.345173	0.787213	0.176671	-1.95377	0.0507287	0.152052	1787.15	1629.54	1433.89	1743.69	1116.26	1381.69	946.288	1270.9	1122.68	1344.42
614774	SMIM14	small integral membrane protein 14	63.3337	-0.508708	0.702852	0.26033	-1.95409	0.050691	0.152052	95.1822	91.0445	59.2167	84.101	44.0629	50.2163	43.9976	52.6665	55.6047	57.245
539983	S100PBP	S100P binding protein	90.449	0.946617	1.92735	0.484972	1.9519	0.0509502	0.152582	32.6745	27.7763	97.2845	35.0421	114.409	68.6782	213.896	132.098	144.749	37.8827
353160	ACBD5	acyl-CoA binding domain containing 5	87.5455	0.569094	1.48359	0.291749	1.95063	0.0511013	0.152742	63.9284	41.6644	53.9295	65.8791	124.458	112.987	106.948	79.4314	122.683	103.546
533188	CD2AP	CD2 associated protein	340.661	-0.464975	0.724484	0.238385	-1.95052	0.0511143	0.152742	461.705	472.197	367.989	391.07	283.703	312.375	209.158	229.66	241.836	436.914
281484	SELE	selectin E	227.193	0.377421	1.29902	0.193517	1.95032	0.051138	0.152742	181.841	174.373	182.937	213.056	234.229	176.495	252.479	252.972	290.38	313.164
526329	DYNC1I2	dynein cytoplasmic 1 intermediate chain 2	264.071	-0.419814	0.747521	0.215401	-1.94898	0.0512973	0.153025	295.491	344.117	314.06	311.174	247.37	289.482	196.974	139.005	228.597	274.439
539813	KCNG1	potassium voltage-gated channel modifier subfamily G member 1	465.732	-0.49151	0.71128	0.252215	-1.94877	0.0513227	0.153025	559.728	691.321	505.457	646.176	320.809	478.532	356.042	253.835	332.745	512.679
535487	INPP4A	inositol polyphosphate-4-phosphatase type I A	153.834	-0.503605	0.705342	0.258493	-1.94823	0.0513869	0.153083	123.595	172.83	179.765	192.031	233.456	173.542	149.592	120.01	70.6091	122.908
100313325	MIR2285D	microRNA 2285d	106.334	0.829771	1.7774	0.426233	1.94676	0.051564	0.153342	76.714	94.1307	40.1827	61.6741	109.771	43.57	146.884	260.742	160.636	69.0307
281375	SERPINE1	serpin family E member 1	119.722	-0.621404	0.650038	0.319148	-1.94707	0.0515261	0.153342	156.269	166.658	181.88	130.357	91.2179	180.188	62.9505	84.6117	72.3743	70.7144
532569	S100A9	S100 calcium binding protein A9	529.13	-0.400288	0.757707	0.205851	-1.94455	0.0518294	0.153997	730.204	726.812	578.42	555.067	421.303	377.361	409.516	554.293	557.812	380.511
281754	EPB42	erythrocyte membrane protein band 4.2	46.3935	-0.654153	0.635449	0.336536	-1.94378	0.0519215	0.154136	85.2378	78.6994	34.8955	44.8539	40.9707	28.8005	36.5519	22.448	48.5437	42.9337
530050	MYH11	myosin heavy chain 11	127.634	0.416791	1.33495	0.214716	1.94112	0.0522433	0.154285	99.4441	95.6738	96.2271	91.1095	161.564	141.049	177.344	138.142	138.57	137.22
531802	NCLN	nicalin	46.8678	0.575627	1.49032	0.296291	1.94277	0.0520436	0.154285	25.5713	44.7507	30.6658	50.4606	37.1056	38.4007	61.5967	67.344	72.3743	40.4082
504750	SH3GLB2	SH3 domain containing GRB2 like, endophilin B2	223.784	-0.367206	0.775283	0.189028	-1.9426	0.0520646	0.154285	277.023	274.676	237.924	298.559	174.705	186.096	198.328	158.863	214.475	217.194
511955	SLC43A2	solute carrier family 43 member 2	220.048	-0.380033	0.76842	0.195739	-1.94153	0.0521941	0.154285	257.134	276.22	233.694	264.918	213.357	163.941	182.759	148.502	188.879	271.072
515911	STRA6	stimulated by retinoic acid 6	66.6898	-0.48005	0.716953	0.24729	-1.94125	0.0522284	0.154285	69.6109	95.6738	85.6527	91.1095	47.928	64.2473	54.1509	44.0326	54.722	59.7705
614551	UBL5	ubiquitin like 5	49.4655	0.56479	1.47917	0.290884	1.94163	0.0521815	0.154285	42.6189	37.035	38.0679	37.8455	43.2898	39.8776	48.059	82.8849	81.2004	43.7756
534850	FAM171A1	family with sequence similarity 171 member A1	74.2515	0.594615	1.51007	0.30654	1.93976	0.0524084	0.154505	46.8808	32.4057	47.5848	58.8707	107.452	86.4016	104.917	70.7975	97.9701	89.2348
100337117	OTOP3	otopetrin 3	26.6976	0.693589	1.6173	0.357558	1.93979	0.0524048	0.154505	21.3095	9.25876	14.8042	21.0253	34.0134	27.3236	35.1981	30.2185	30.8915	42.9337
617589	CLUAP1	clusterin associated protein 1	121.282	-0.530474	0.692327	0.273954	-1.93636	0.0528238	0.155529	152.007	192.891	151.214	145.775	76.5302	133.664	96.7948	63.0271	103.266	97.6532
505149	DYRK3	dual specificity tyrosine phosphorylation regulated kinase 3	157.48	0.645526	1.56431	0.333468	1.9358	0.0528926	0.155529	106.547	109.562	78.2506	102.323	215.676	131.449	228.111	204.622	293.028	105.23
508840	FNDC3A	fibronectin type III domain containing 3A	187.369	0.501659	1.41584	0.259133	1.93592	0.052878	0.155529	126.436	123.45	112.089	168.202	243.505	172.065	310.014	197.715	221.536	198.674
533538	SGMS1	sphingomyelin synthase 1	144.658	0.548918	1.46299	0.283663	1.93511	0.0529773	0.155644	83.8172	103.389	81.4229	93.9128	221.86	161.726	184.113	164.906	190.645	160.791
531211	FBXL14	F-box and leucine rich repeat protein 14	591.366	-0.414467	0.750297	0.214537	-1.93191	0.0533704	0.15626	809.759	703.666	580.535	577.494	707.325	352.991	547.601	452.414	436.011	745.868
785513	SAMD14	sterile alpha motif domain containing 14	104.787	-0.443502	0.735348	0.229527	-1.93224	0.0533301	0.15626	152.007	162.028	101.514	98.1179	91.9909	88.617	87.9953	80.2948	75.0222	110.281
511211	SPOCK1	SPARC (osteonectin), cwcv and kazal like domains proteoglycan 1	71.4573	-0.434273	0.740066	0.224681	-1.93284	0.0532559	0.15626	92.341	83.3288	88.825	85.5027	61.8426	70.1551	61.5967	72.5243	53.8394	44.6174
521829	YIPF5	Yip1 domain family member 5	24.399	0.728911	1.65739	0.377299	1.93192	0.0533695	0.15626	25.5713	7.71563	9.51696	23.8286	24.737	23.6312	35.875	25.9015	33.5393	33.6735
506384	PARP16	poly(ADP-ribose) polymerase family member 16	1030.28	-0.34886	0.785204	0.180798	-1.92955	0.0536626	0.156745	1306.98	1291.6	947.467	1390.47	837.195	901.678	808.203	879.789	1090.03	849.414
514554	PLD1	phospholipase D1, phosphatidylcholine-specific	68.3803	0.512857	1.42687	0.265804	1.92946	0.0536741	0.156745	69.6109	40.1213	47.5848	50.4606	72.6651	51.6932	87.9953	90.6554	100.618	72.3981
617865	SLC12A9	solute carrier family 12 member 9	1002.48	-0.482823	0.715576	0.250227	-1.92954	0.0536634	0.156745	1261.52	1425.85	973.903	1553.07	631.568	1126.91	831.217	697.615	662.843	860.358
493717	NLRP5	NLR family pyrin domain containing 5	1217.73	-0.375716	0.770723	0.194951	-1.92724	0.05395	0.157416	1368.07	1780.77	1294.31	1491.39	944.646	780.568	1096.56	1059.37	1172.11	1189.52
533098	SYNRG	synergin gamma	692.8	-0.297787	0.813499	0.15458	-1.92643	0.0540504	0.157574	835.331	870.323	649.268	828.395	639.298	561.241	585.507	570.697	650.486	737.45
514767	TGM5	transglutaminase 5	106.569	-0.410329	0.752452	0.213125	-1.9253	0.0541923	0.157853	120.754	152.77	104.687	128.955	102.04	62.0319	92.7335	107.06	95.3223	99.3369
618133	SUPT3H	SPT3 homolog, SAGA and STAGA complex component	83.8356	-0.544727	0.685521	0.28308	-1.92429	0.0543187	0.158085	116.492	145.054	80.3655	98.1179	58.7505	67.2012	49.4127	55.2566	76.7874	90.9185
616227	CAMK2N1	calcium/calmodulin dependent protein kinase II inhibitor 1	105.58	-0.599856	0.65982	0.31202	-1.92249	0.0545437	0.158475	150.587	183.632	118.433	130.357	54.8853	114.464	87.9953	76.8412	84.7309	53.8776
534011	FGGY	FGGY carbohydrate kinase domain containing	33.4335	0.767717	1.70257	0.399414	1.92211	0.0545921	0.158475	19.8888	21.6038	14.8042	23.8286	42.5168	31.0159	56.1816	67.344	34.4219	22.7296
507522	NPHP3	nephrocystin 3	48.6966	0.487559	1.40207	0.253634	1.92229	0.0545693	0.158475	35.5158	40.1213	45.4699	28.0337	51.7932	45.047	59.566	64.7538	65.3134	51.3521
537150	SLC14A2	solute carrier family 14 member 2	25.3791	0.824335	1.77072	0.428975	1.92164	0.0546512	0.158512	14.2063	16.9744	14.8042	25.2303	20.0989	11.8156	23.0141	58.7102	34.4219	34.5154
505267	MFNG	MFNG O-fucosylpeptide 3-beta-N-acetylglucosaminyltransferase	94.4257	0.427807	1.34519	0.222834	1.91985	0.0548772	0.159032	68.1903	57.0957	95.1696	81.2977	98.9482	132.925	120.486	93.2455	89.144	107.755
526521	DOHH	deoxyhypusine hydroxylase	285.489	-0.364552	0.77671	0.189929	-1.91941	0.0549323	0.159056	402.038	378.066	314.06	239.688	274.427	231.881	279.554	211.529	292.145	231.505
281684	CHRM1	cholinergic receptor muscarinic 1	4875.24	-0.35924	0.779575	0.187263	-1.91837	0.0550643	0.159059	5665.47	7263.5	4168.43	5480.58	4819.86	3388.86	5027.91	3880.91	4036.19	5020.72
539633	HLTF	helicase like transcription factor	49.9617	0.52843	1.44236	0.275433	1.91854	0.0550424	0.159059	36.9364	27.7763	27.4935	53.264	57.9775	64.2473	65.658	58.7102	50.309	57.245
NA	LOC540193	NA	40.7231	0.642693	1.56124	0.335033	1.9183	0.0550733	0.159059	25.5713	16.9744	40.1827	23.8286	50.2471	36.9237	68.3656	44.0326	56.4873	44.6174
505225	ADD3	adducin 3	75.6732	0.605656	1.52167	0.315899	1.91725	0.0552067	0.15931	45.4602	33.9488	52.872	60.2724	105.132	62.0319	119.132	87.2018	82.0831	108.597
768307	RHOH	ras homolog family member H	4152.54	-0.471059	0.721435	0.24577	-1.91667	0.0552801	0.159386	5406.92	6552.11	3727.48	4987.19	3450.82	2864.54	4281.99	2079.03	4178.29	3997.05
786914	LOC786914	RIKEN cDNA 1700001K19-like	48.9227	0.590915	1.5062	0.308428	1.91589	0.0553791	0.159537	28.4126	30.8625	45.4699	37.8455	51.0202	29.539	67.6887	56.9834	72.3743	69.0307
537804	GRIN2B	glutamate ionotropic receptor NMDA type subunit 2B	28.702	0.786457	1.72483	0.410645	1.91517	0.0554702	0.159648	24.1507	6.17251	15.8616	15.4185	41.7438	26.5851	37.9057	38.8523	44.1307	36.199
534787	ITIH5	inter-alpha-trypsin inhibitor heavy chain family member 5	32.6388	-0.593366	0.662795	0.309876	-1.91485	0.0555115	0.159648	53.984	37.035	39.1253	29.4354	37.1056	18.4619	37.9057	18.9945	28.2436	26.097
768072	COA6	cytochrome c oxidase assembly factor 6 homolog (S. cerevisiae)	64.1182	0.57573	1.49043	0.300835	1.91377	0.0556493	0.15991	26.992	35.4919	65.5613	64.4775	63.3887	63.5088	91.3797	83.7483	94.4396	52.1939
100124520	GNAL	G protein subunit alpha L	55.5515	0.555462	1.46964	0.290377	1.9129	0.0557605	0.15996	19.8888	44.7507	46.5274	60.2724	52.5662	48.0009	62.2736	68.2074	68.8439	84.1838
NA	TMEM8C	NA	301.227	-0.454173	0.729928	0.237399	-1.91312	0.0557329	0.15996	323.904	543.18	272.82	294.354	308.44	197.911	297.83	190.808	301.854	281.174
512082	PIK3IP1	phosphoinositide-3-kinase interacting protein 1	116.347	-0.494054	0.710027	0.258603	-1.91047	0.0560723	0.160449	142.063	179.003	156.501	123.348	81.1684	127.018	106.271	93.2455	90.0266	64.8215
616881	TSPAN3	tetraspanin 3	43.9472	0.752354	1.68454	0.393744	1.91077	0.0560343	0.160449	36.9364	18.5175	24.3211	21.0253	61.0696	28.062	60.9198	47.4862	84.7309	56.4031
506676	UBXN1	UBX domain protein 1	58.2919	-0.554526	0.680881	0.290254	-1.91049	0.0560704	0.160449	72.4521	94.1307	57.1018	79.896	44.8359	53.1702	50.7665	27.6283	41.4828	61.4542
538943	GINS3	GINS complex subunit 3	67.9328	0.539719	1.45369	0.282772	1.90867	0.0563047	0.160895	38.357	50.9232	74.0208	63.0758	50.2471	50.2163	116.425	88.9286	68.8439	78.2909
444880	PAM16	presequence translocase associated motor 16	112.627	-0.500663	0.706782	0.262379	-1.90816	0.05637	0.160895	184.682	163.571	116.318	121.946	74.9842	67.2012	98.8255	91.5188	112.092	95.1277
100125278	ZNF774	zinc finger protein 774	3803.1	-0.544724	0.685522	0.285418	-1.90852	0.0563246	0.160895	6013.53	6155.53	3223.08	4081.7	3090.59	1994.62	2583	2460.65	3385.71	5042.61
506107	BAG2	BCL2 associated athanogene 2	338.673	0.41713	1.33527	0.218848	1.90603	0.0566468	0.16155	208.833	260.788	226.292	357.429	395.02	303.513	387.179	369.529	403.354	474.797
513446	BANP	BTG3 associated nuclear protein	26.3128	-0.950553	0.517434	0.499111	-1.90449	0.0568462	0.161906	35.5158	37.035	47.5848	40.6488	13.1416	37.6622	14.2146	18.9945	14.1218	4.20919
506971	RASGEF1B	RasGEF domain family member 1B	68.0787	0.837924	1.78748	0.440036	1.90422	0.0568818	0.161906	19.8888	23.1469	30.6658	47.6573	120.593	86.4016	125.901	84.6117	65.3134	76.6072
513556	TP53I13	tumor protein p53 inducible protein 13	33.7127	0.612141	1.52853	0.321508	1.90397	0.0569142	0.161906	18.4682	18.5175	30.6658	21.0253	42.5168	39.1392	50.0896	44.0326	42.3655	30.3062
511073	GIP	gastric inhibitory polypeptide	159.575	-0.668544	0.629141	0.3517	-1.90089	0.0573158	0.162913	178.999	254.616	215.718	259.312	71.892	141.049	96.7948	68.2074	113.857	195.306
514674	TARBP2	TARBP2, RISC loading complex RNA binding subunit	28.1932	-0.789854	0.578403	0.415708	-1.90002	0.0574307	0.163103	42.6189	55.5525	42.2976	21.0253	17.7798	14.031	25.0448	31.9452	10.5914	21.0459
529613	DDX24	DEAD-box helicase 24	23519.1	-0.713348	0.609903	0.3763	-1.89569	0.0580009	0.163767	26794.5	43270.8	37031.6	28095.4	10899	32982.5	11983.6	21312.6	13952.4	8868.76
535136	DIP2C	disco interacting protein 2 homolog C	366.211	-0.435409	0.739484	0.229629	-1.89614	0.0579415	0.163767	569.673	422.817	429.321	349.019	334.723	271.759	212.542	297.868	325.684	448.7
281767	FDFT1	farnesyl-diphosphate farnesyltransferase 1	686.974	-0.316274	0.803141	0.166813	-1.89598	0.0579627	0.163767	843.854	896.556	833.263	627.954	609.923	691.212	580.092	516.304	679.612	590.97
532572	LAMC1	laminin subunit gamma 1	38.6272	0.583991	1.49899	0.308003	1.89605	0.057953	0.163767	25.5713	27.7763	33.8381	26.632	39.4247	31.0159	48.059	68.2074	52.0742	33.6735
616744	MSH3	mutS homolog 3	530.36	-0.36539	0.776259	0.192735	-1.89582	0.0579842	0.163767	694.688	711.381	476.906	655.988	449.132	353.729	500.219	484.359	542.807	434.388
512868	SMYD4	SET and MYND domain containing 4	178.233	0.383231	1.30426	0.202071	1.89651	0.0578921	0.163767	133.539	165.115	126.893	158.39	188.62	159.511	226.757	234.841	231.245	157.424
510865	TUBGCP4	tubulin gamma complex associated protein 4	24.496	0.731676	1.66057	0.385855	1.89624	0.0579277	0.163767	17.0476	10.8019	7.40208	26.632	29.3752	28.8005	31.1368	34.5354	24.7132	34.5154
281663	CAPN3	calpain 3	36.3151	0.586849	1.50196	0.309898	1.89369	0.0582666	0.164011	29.8332	21.6038	16.919	35.0421	40.9707	38.4007	51.4434	44.0326	52.0742	32.8317
281051	CD34	CD34 molecule	37.1354	0.559689	1.47395	0.295508	1.89399	0.0582268	0.164011	31.2539	13.8881	31.7232	32.2387	39.4247	50.2163	39.9363	54.3932	36.1872	42.0919
517097	CTCF	CCCTC-binding factor	117.548	0.381593	1.30278	0.201494	1.89382	0.0582487	0.164011	79.5553	100.303	89.8824	113.536	126.004	114.464	159.745	145.912	133.275	112.806
531476	JDP2	Jun dimerization protein 2	260.971	-0.399339	0.758206	0.21089	-1.89359	0.0582796	0.164011	353.737	358.005	274.935	285.944	213.357	162.464	243.679	284.054	236.54	196.99
537960	ATP1A4	ATPase Na+/K+ transporting subunit alpha 4	173.293	-0.416547	0.749215	0.220043	-1.89303	0.0583544	0.164086	210.253	208.322	177.65	169.604	224.18	92.3094	156.361	206.349	145.631	142.271
509598	NIFK	nucleolar protein interacting with the FHA domain of MKI67	59.951	-0.47563	0.719153	0.251309	-1.89261	0.0584101	0.164107	73.8728	83.3288	66.6187	75.6909	50.2471	38.4007	51.4434	67.344	53.8394	38.7245
614766	RPRD2	regulation of nuclear pre-mRNA domain containing 2	471.455	-0.429499	0.742519	0.226987	-1.89217	0.058468	0.164134	524.213	709.838	677.819	430.317	364.098	429.054	296.476	451.55	480.142	351.046
783572	ADK	adenosine kinase	141.31	0.629421	1.54694	0.333804	1.8856	0.0593489	0.16647	66.7696	86.4151	66.6187	109.331	223.406	151.387	231.495	138.142	151.81	187.73
531850	TNFAIP8L1	TNF alpha induced protein 8 like 1	29.4469	0.567659	1.48212	0.301351	1.88372	0.0596035	0.167047	21.3095	18.5175	27.4935	25.2303	25.5101	33.2314	41.2901	46.6228	30.0089	25.2551
513438	MRPS35	mitochondrial ribosomal protein S35	155.362	-0.483046	0.715465	0.256618	-1.88235	0.0597884	0.167427	225.88	223.753	143.812	180.817	132.962	136.618	123.193	90.6554	100.618	195.306
516769	A2ML1	alpha-2-macroglobulin like 1	1071.62	-0.337264	0.791541	0.179398	-1.87997	0.060112	0.168057	1345.34	1444.37	1220.29	1117.14	856.52	1120.27	750.667	976.488	990.292	894.874
616397	ZMAT4	zinc finger matrin-type 4	118.593	-0.344213	0.787737	0.183068	-1.88025	0.060074	0.168057	152.007	143.511	139.582	120.545	108.998	125.541	91.3797	94.1089	105.031	105.23
444987	NEIL2	nei like DNA glycosylase 2	327.873	0.749158	1.68081	0.398592	1.87951	0.0601747	0.168095	92.341	163.571	523.433	222.868	219.541	369.976	454.191	483.495	566.638	182.679
789104	KCNAB3	potassium voltage-gated channel subfamily A regulatory beta subunit 3	378.29	-0.437009	0.738665	0.232631	-1.87855	0.0603057	0.168322	501.482	466.024	532.95	410.693	265.923	439.393	271.432	360.895	281.554	252.551
530661	SLC7A6	solute carrier family 7 member 6	29.3716	0.570959	1.48551	0.304294	1.87634	0.0606084	0.169029	21.3095	13.8881	22.2062	25.2303	34.0134	35.4468	39.2594	31.9452	30.0089	40.4082
100125308	KCTD5	potassium channel tetramerization domain containing 5	73.6467	-0.438172	0.738069	0.233608	-1.87567	0.0607001	0.169146	78.1347	97.217	96.2271	93.9128	59.5235	79.7553	56.1816	51.8031	53.8394	69.8725
534122	NPEPPS	aminopeptidase puromycin sensitive	71.7938	-0.515914	0.69935	0.275739	-1.87102	0.0613422	0.170656	125.015	100.303	81.4229	65.8791	51.0202	62.7704	46.0283	74.2511	57.3699	53.8776
497019	TPM3	tropomyosin 3	155.985	-0.502924	0.705675	0.268774	-1.87118	0.0613201	0.170656	186.103	183.632	221.005	215.859	108.998	206.773	96.1179	107.923	114.74	118.699
515562	TAGLN3	transgelin 3	111.772	0.584525	1.49955	0.312569	1.87007	0.0614742	0.170884	83.8172	66.3544	86.7101	91.1095	118.274	171.326	152.976	56.12	104.148	186.888
614557	RWDD3	RWD domain containing 3	219.913	0.697727	1.62195	0.373301	1.86907	0.0616129	0.17113	174.738	83.3288	76.1357	201.842	301.483	326.406	353.335	141.595	214.475	325.791
541302	CYP2R1	cytochrome P450, family 2, subfamily R, polypeptide 1	70.1008	-0.535234	0.690047	0.286619	-1.8674	0.0618451	0.171635	95.1822	97.217	102.572	78.4943	42.5168	67.9397	51.4434	51.8031	40.6002	73.2399
281638	ARRB2	arrestin beta 2	53.0337	-0.725231	0.6049	0.388744	-1.86557	0.0621011	0.172004	76.714	109.562	68.7336	44.8539	31.6943	70.1551	33.1674	41.4425	21.1827	32.8317
280830	IVL	involucrin	612.245	-0.41828	0.748316	0.224277	-1.86501	0.0621799	0.172004	727.363	998.403	594.282	710.654	473.096	359.637	534.741	564.654	628.421	531.2
529591	PHF20	PHD finger protein 20	69.6796	-0.740352	0.598593	0.39693	-1.8652	0.062154	0.172004	102.285	123.45	89.8824	91.1095	30.1483	66.4627	41.2901	27.6283	35.3045	89.2348
281898	RPSA	ribosomal protein SA	39.7183	-0.785425	0.580181	0.42097	-1.86575	0.0620766	0.172004	92.341	41.6644	30.6658	64.4775	23.191	41.3546	26.3986	30.2185	12.3566	34.5154
537739	KATNAL1	katanin catalytic subunit A1 like 1	450.087	-0.452482	0.730785	0.242787	-1.8637	0.0623644	0.172375	546.943	705.209	317.232	490.589	541.123	299.821	372.288	317.726	563.107	346.837
618474	FGF4	fibroblast growth factor 4	28.6054	0.608263	1.52442	0.326727	1.86169	0.0626473	0.173016	17.0476	9.25876	27.4935	29.4354	28.6022	37.6622	31.1368	31.9452	41.4828	31.9898
521686	ZC3H4	zinc finger CCCH-type containing 4	422.763	-0.480752	0.716604	0.25838	-1.86064	0.0627952	0.173284	532.736	720.64	520.261	430.317	260.512	265.851	381.764	288.37	429.833	397.347
523797	ASAP3	ArfGAP with SH3 domain, ankyrin repeat and PH domain 3	54.0086	0.628264	1.5457	0.337966	1.85896	0.0630335	0.173801	38.357	13.8881	42.2976	47.6573	68.0269	56.1241	87.9953	56.12	72.3743	57.245
540204	KRT81	keratin 81	54.6306	0.502539	1.4167	0.270477	1.85797	0.0631734	0.174046	26.992	49.38	57.1018	40.6488	51.0202	67.9397	75.8113	48.3495	78.5526	50.5103
518047	SLCO1C1	solute carrier organic anion transporter family member 1C1	93.4784	0.433178	1.3502	0.233214	1.85742	0.0632508	0.174119	66.7696	50.9232	93.0548	79.896	104.359	101.171	106.948	88.0652	134.157	109.439
510320	TCAF2	TRPM8 channel associated factor 2	66.9393	-3.45158	0.0914054	1.8589	-1.85678	0.0633425	0.17423	117.912	0	432.493	49.0589	13.9146	47.2624	2.70755	6.04369	0	0
507580	COIL	coilin	70.5714	0.389764	1.31018	0.209965	1.85633	0.0634068	0.174266	71.0315	55.5525	60.2741	50.4606	67.2539	67.2012	82.5802	94.1089	87.3787	69.8725
518544	BLOC1S4	biogenesis of lysosomal organelles complex 1 subunit 4	144.812	-0.532388	0.691409	0.286858	-1.85593	0.0634634	0.174281	177.579	209.865	194.569	149.98	125.231	187.573	123.193	87.2018	130.627	62.296
506627	DKK3	dickkopf WNT signaling pathway inhibitor 3	90.653	-0.435243	0.739569	0.234769	-1.85392	0.0637507	0.174789	115.071	126.536	105.744	86.9044	88.1257	103.386	80.5495	85.4751	60.0177	54.7195
789205	IGLL1	immunoglobulin lambda-like polypeptide 1	109.782	-0.364628	0.776669	0.196663	-1.85408	0.0637276	0.174789	147.746	137.338	118.433	120.545	95.083	79.7553	87.9953	101.016	115.622	94.2858
786620	CAMKMT	calmodulin-lysine N-methyltransferase	30.0992	-0.594958	0.662064	0.320994	-1.85348	0.0638131	0.174819	41.1983	46.2938	32.7807	37.8455	23.964	31.0159	18.2759	16.4043	22.0653	31.148
282031	RAP1A	RAP1A, member of RAS oncogene family	67.4261	-0.646946	0.638631	0.349173	-1.85279	0.0639118	0.174922	102.285	123.45	79.308	77.0926	30.9213	74.586	55.5047	56.12	37.9524	37.0409
535470	PIN1	peptidylprolyl cis/trans isomerase, NIMA-interacting 1	62.417	0.458095	1.37373	0.247454	1.85124	0.0641357	0.17528	48.3014	46.2938	62.389	43.4522	61.0696	57.601	76.4882	58.7102	68.8439	101.021
615106	ENOSF1	enolase superfamily member 1	445.93	-0.382667	0.767019	0.207076	-1.84795	0.0646095	0.17559	581.038	645.027	464.216	498.999	337.042	418.715	415.608	288.37	355.693	454.592
506895	HAX1	HCLS1 associated protein X-1	37.3699	0.768248	1.7032	0.415696	1.8481	0.0645881	0.17559	25.5713	7.71563	22.2062	25.2303	55.6584	55.3856	57.5354	34.5354	31.7741	58.0868
540558	MBD1	methyl-CpG binding domain protein 1	32.8812	0.706519	1.63186	0.382019	1.84944	0.0643948	0.17559	17.0476	9.25876	23.2637	25.2303	47.928	31.0159	49.4127	41.4425	37.0698	47.1429
784035	RNF43	ring finger protein 43	56.4446	0.552885	1.46702	0.299174	1.84804	0.0645967	0.17559	44.0395	35.4919	53.9295	33.6404	60.2966	48.0009	98.1486	45.7594	80.3178	64.8215
512692	RRP7A	ribosomal RNA processing 7 homolog A	30.3723	0.817687	1.76258	0.442469	1.84801	0.0646009	0.17559	19.8888	10.8019	17.9765	19.6236	40.1977	23.6312	40.6132	20.7212	36.1872	74.0817
780877	SNRPN	small nuclear ribonucleoprotein polypeptide N	161.358	0.586944	1.50206	0.317595	1.84809	0.0645898	0.17559	107.968	128.079	129.008	89.7078	188.62	87.14	247.741	135.551	248.897	250.868
511267	STARD3	StAR related lipid transfer domain containing 3	294.954	-0.527047	0.693974	0.28509	-1.8487	0.0645009	0.17559	474.491	248.443	381.736	430.317	207.173	386.961	175.314	209.802	202.119	233.189
507981	DFFA	DNA fragmentation factor subunit alpha	124.342	-0.581246	0.668386	0.31471	-1.84693	0.064758	0.175853	184.682	171.287	169.19	120.545	100.494	145.48	92.7335	44.0326	79.4352	135.536
281189	GFAP	glial fibrillary acidic protein	51.7151	0.705518	1.63073	0.382188	1.846	0.0648926	0.176078	21.3095	35.4919	23.2637	39.2471	75.7572	80.4938	77.842	68.2074	63.5482	31.9898
540026	ARHGEF17	Rho guanine nucleotide exchange factor 17	98.7816	0.559704	1.47397	0.303338	1.84515	0.0650158	0.176181	52.5633	61.7251	56.0443	102.323	125.231	81.9707	173.283	113.103	112.975	108.597
541229	SF1	splicing factor 1	527.922	-0.414655	0.750199	0.224743	-1.84502	0.0650341	0.176181	556.887	746.873	689.451	483.581	540.35	652.073	452.837	386.796	475.729	294.643
516539	NANP	N-acetylneuraminic acid phosphatase	88.1531	0.628836	1.54632	0.340949	1.84437	0.0651295	0.1763	29.8332	61.7251	87.7676	63.0758	102.04	62.0319	148.238	137.278	112.092	77.4491
504199	NIT1	nitrilase 1	48.1493	0.731802	1.66071	0.396887	1.84386	0.0652042	0.176307	24.1507	16.9744	19.0339	44.8539	74.2111	62.0319	83.2571	56.12	51.1916	49.6684
508156	SSBP4	single stranded DNA binding protein 4	183.695	-0.314027	0.804393	0.170363	-1.84328	0.0652874	0.176307	210.253	211.408	246.384	173.809	176.251	172.065	150.946	183.901	173.875	138.061
519992	USP16	ubiquitin specific peptidase 16	47.6179	-0.623575	0.649061	0.338286	-1.84334	0.0652799	0.176307	73.8728	64.8113	44.4125	67.2808	39.4247	46.5239	33.8443	22.448	22.948	60.6123
540780	CASC4	cancer susceptibility 4	69.9139	0.606126	1.52217	0.329343	1.84041	0.0657083	0.177023	32.6745	33.9488	42.2976	63.0758	102.813	67.2012	99.5023	82.8849	101.501	73.2399
540161	DRG1	developmentally regulated GTP binding protein 1	33.1342	0.704026	1.62904	0.382529	1.84045	0.0657017	0.177023	28.4126	20.0606	11.6318	25.2303	40.1977	37.6622	68.3656	36.2622	26.4784	37.0409
281869	INPP1	inositol polyphosphate-1-phosphatase	284.035	-0.381595	0.767589	0.207264	-1.84111	0.0656056	0.177023	340.951	388.868	296.083	318.182	263.604	159.511	224.05	249.518	295.676	303.903
511581	C1R	complement C1r	422.444	0.417187	1.33532	0.226898	1.83866	0.0659659	0.177425	277.023	336.402	295.026	441.53	457.635	381.053	453.514	368.665	539.277	674.312
511671	CXCL16	C-X-C motif chemokine ligand 16	40.6253	-0.639912	0.641752	0.347987	-1.8389	0.0659303	0.177425	55.4046	67.8976	58.1592	30.837	35.5595	37.6622	26.3986	49.2129	29.1262	15.9949
505370	PRKAR1B	protein kinase cAMP-dependent type I regulatory subunit beta	105.909	-0.586992	0.66573	0.319307	-1.83833	0.0660138	0.177425	137.801	154.313	190.339	79.896	74.2111	136.618	78.5189	66.4806	61.7829	79.1328
534296	MTHFD1L	methylenetetrahydrofolate dehydrogenase (NADP+ dependent) 1 like	61.3517	0.545736	1.45976	0.297236	1.83604	0.0663524	0.178054	32.6745	26.2331	51.8146	63.0758	73.4381	67.9397	72.4269	73.3877	94.4396	58.0868
538954	PRKAA2	protein kinase AMP-activated catalytic subunit alpha 2	25.1884	-0.689845	0.61992	0.375723	-1.83605	0.0663509	0.178054	24.1507	33.9488	28.5509	50.4606	19.3258	16.9849	29.1061	18.9945	19.4175	10.9439
508151	DSG2	desmoglein 2	346.939	0.60695	1.52304	0.331081	1.83324	0.0667669	0.179026	173.317	228.383	395.483	200.441	375.694	225.973	660.641	357.441	566.638	285.383
100125764	SERPIND1	serpin family D member 1	292.736	-0.825055	0.564461	0.450182	-1.83271	0.0668451	0.179094	747.252	422.817	299.256	330.797	71.892	289.482	117.778	136.415	196.823	314.847
538666	FAM131A	family with sequence similarity 131 member A	96.53	0.497909	1.41217	0.272127	1.82969	0.067296	0.180161	80.9759	46.2938	93.0548	74.2892	103.586	129.233	102.887	147.639	119.153	68.1889
527362	ARHGEF40	Rho guanine nucleotide exchange factor 40	192.445	-0.442356	0.735932	0.24187	-1.8289	0.0674148	0.180337	254.293	253.073	158.616	288.747	155.38	158.034	120.486	149.366	165.049	221.403
512059	MATN1	matrilin 1	43.6326	0.5999	1.51561	0.328183	1.82794	0.0675581	0.180367	34.0951	23.1469	31.7232	28.0337	54.8853	50.9548	69.0424	29.3551	49.4264	65.6634
337927	MTCH2	mitochondrial carrier 2	143.616	0.667766	1.58861	0.365424	1.82737	0.0676438	0.180367	99.4441	40.1213	108.916	158.39	146.876	170.588	212.542	88.9286	281.554	128.801
524990	PLVAP	plasmalemma vesicle associated protein	277.372	-0.765751	0.588147	0.418837	-1.82828	0.0675077	0.180367	446.078	615.707	282.337	283.14	120.593	148.433	328.29	162.316	82.0831	304.745
616071	SLC6A11	solute carrier family 6 member 11	249.916	-0.410625	0.752297	0.224746	-1.82706	0.0676907	0.180367	298.332	305.539	333.094	308.37	182.436	243.697	234.88	235.704	222.419	134.694
534816	STIM1	stromal interaction molecule 1	75.9929	0.655377	1.57503	0.358594	1.82763	0.0676046	0.180367	46.8808	35.4919	54.9869	44.8539	110.544	67.2012	106.271	135.551	106.796	51.3521
507581	LOC507581	uncharacterized LOC507581	73.188	0.756119	1.68894	0.413985	1.82644	0.0677836	0.180474	24.1507	15.4313	65.5613	53.264	111.317	90.0939	114.394	84.6117	101.501	71.5562
618601	ULK2	unc-51 like autophagy activating kinase 2	90.6173	-0.345842	0.786849	0.189519	-1.82484	0.0680254	0.180976	112.23	124.993	85.6527	81.2977	103.586	74.586	79.8726	80.2948	80.3178	83.3419
281702	CNGB1	cyclic nucleotide gated channel beta 1	533.288	-0.300041	0.812229	0.164463	-1.82436	0.0680971	0.181026	602.347	768.477	540.352	548.058	486.238	446.039	526.618	418.742	458.076	537.934
613566	ZNF814	zinc finger protein 814	39.5743	0.586413	1.50151	0.32164	1.82319	0.0682739	0.181354	26.992	43.2075	35.953	33.6404	19.3258	28.062	41.2901	45.7594	60.9003	60.6123
615133	ACTR8	ARP8 actin related protein 8 homolog	25.7909	0.837394	1.78682	0.459842	1.82105	0.0685998	0.181513	19.8888	6.17251	10.5744	14.0168	40.1977	18.4619	42.6439	31.0818	35.3045	39.5664
533603	DNAJB12	DnaJ heat shock protein family (Hsp40) member B12	135.482	-0.490473	0.711792	0.269237	-1.82171	0.0684987	0.181513	160.531	233.012	129.008	138.767	131.416	110.771	121.84	58.7102	120.918	149.847
505251	ELF1	E74 like ETS transcription factor 1	28.0508	0.699315	1.62373	0.383955	1.82134	0.0685546	0.181513	9.94441	21.6038	14.8042	23.8286	35.5595	22.1542	41.2901	25.9015	45.0133	40.4082
613455	IQCG	IQ motif containing G	134.618	0.560431	1.47471	0.307724	1.82121	0.0685742	0.181513	115.071	70.9838	59.2167	112.135	184.755	115.941	174.637	126.918	203.001	183.521
540559	LANCL1	LanC like 1	128.89	0.51215	1.42617	0.281089	1.82202	0.0684518	0.181513	82.3966	83.3288	77.1932	110.733	175.478	98.2172	196.974	141.595	157.988	165
541054	BTG3	BTG anti-proliferation factor 3	38.9879	-0.712921	0.610084	0.391787	-1.81966	0.0688106	0.181829	29.8332	92.5876	30.6658	61.6741	28.6022	42.8315	28.4292	28.4917	28.2436	18.5204
615804	RAB12	RAB12, member RAS oncogene family	33.7779	0.715534	1.64209	0.393325	1.81919	0.0688824	0.181829	28.4126	13.8881	19.0339	25.2303	40.1977	24.3697	51.4434	38.8523	26.4784	69.8725
617367	RRAGC	Ras related GTP binding C	24.3535	0.632102	1.54982	0.347444	1.81929	0.068867	0.181829	21.3095	10.8019	24.3211	14.0168	23.964	34.7083	31.1368	20.7212	23.8306	38.7245
614017	SRP54	signal recognition particle 54	108.209	-0.56692	0.675057	0.31169	-1.81886	0.0689329	0.181829	157.69	151.226	106.801	162.595	68.7999	81.9707	63.6274	56.12	92.6744	140.587
784997	B3GNT3	UDP-GlcNAc:betaGal beta-1,3-N-acetylglucosaminyltransferase 3	36.1449	-0.570751	0.673266	0.31395	-1.81797	0.0690691	0.182048	69.6109	37.035	52.872	25.2303	31.6943	31.0159	30.4599	27.6283	25.5958	30.3062
505757	PPP2R5C	protein phosphatase 2 regulatory subunit B'gamma	41.6413	-0.466503	0.723717	0.256677	-1.81747	0.0691453	0.182108	55.4046	44.7507	63.4464	37.8455	40.1977	42.0931	31.8137	31.0818	34.4219	35.3572
768022	MGC137030	uncharacterized protein MGC137030	28.9121	-0.865424	0.548885	0.476293	-1.817	0.0692173	0.182157	38.357	35.4919	56.0443	50.4606	6.9573	33.2314	20.3066	20.7212	13.2392	14.3112
527162	TBC1D8	TBC1 domain family member 8	61.0337	0.827332	1.7744	0.455872	1.81483	0.0695498	0.18289	12.7857	54.0094	54.9869	30.837	66.4808	31.7544	143.5	63.8905	103.266	48.8266
511883	ANKRD13A	ankyrin repeat domain 13A	69.662	-0.415886	0.749559	0.229342	-1.81339	0.0697721	0.183333	69.6109	98.7601	105.744	60.2724	64.1617	58.3395	62.9505	63.8905	56.4873	56.4031
508394	CASQ1	calsequestrin 1	68.2499	-0.732462	0.601876	0.403998	-1.81303	0.0698267	0.183336	116.492	129.623	68.7336	61.6741	50.2471	52.4317	35.1981	26.7649	34.4219	106.913
506626	RTN4IP1	reticulon 4 interacting protein 1	91.6311	0.611895	1.52827	0.338184	1.80935	0.0703961	0.184688	76.714	38.5782	44.4125	91.1095	110.544	102.648	122.516	70.7975	84.7309	174.26
537445	AQR	aquarius intron-binding spliceosomal factor	31.2469	0.753253	1.68559	0.416496	1.80855	0.0705211	0.184815	18.4682	16.9744	11.6318	18.2219	49.4741	34.7083	58.8891	27.6283	33.5393	42.9337
527023	SLC40A1	solute carrier family 40 member 1	58.0463	-0.452211	0.730922	0.250069	-1.80835	0.0705527	0.184815	52.5633	95.6738	67.6762	70.0842	50.2471	46.5239	41.2901	56.9834	56.4873	42.9337
537027	BUB1B	BUB1 mitotic checkpoint serine/threonine kinase B	240.033	-0.352032	0.78348	0.194771	-1.80741	0.0706981	0.185053	279.864	324.057	255.901	299.96	187.847	206.034	167.191	251.245	231.245	196.99
767965	TEX33	testis expressed 33	80.4617	-0.438367	0.737969	0.24268	-1.80636	0.070862	0.18534	106.547	104.933	76.1357	117.741	59.5235	70.8936	69.0424	71.6609	76.7874	51.3521
536341	SLC26A5	solute carrier family 26 member 5	152.257	0.435312	1.3522	0.241118	1.80539	0.0710142	0.185595	122.174	94.1307	124.778	103.725	199.442	135.879	203.066	183.038	205.649	150.689
616813	EMC2	ER membrane protein complex subunit 2	13358.1	-0.333235	0.793754	0.184618	-1.805	0.0710747	0.185611	16911.2	15895.7	12915.6	15904.9	12843.9	8345.5	12490.6	10090.4	15223.3	12960.1
615013	BAD	BCL2 associated agonist of cell death	275.806	-0.456015	0.728997	0.25279	-1.80393	0.0712423	0.185906	240.087	421.273	369.047	349.019	217.222	352.991	218.634	181.311	186.231	222.245
516318	PER1	period circadian regulator 1	647.519	-0.312675	0.805147	0.173457	-1.80261	0.0714491	0.186303	741.569	703.666	700.026	918.103	525.662	649.858	490.743	631.998	578.994	534.567
617280	ARHGEF19	Rho guanine nucleotide exchange factor 19	62.5049	0.452685	1.36859	0.251302	1.80136	0.0716457	0.186545	61.0871	44.7507	54.9869	56.0674	47.155	48.7393	75.1344	83.7483	58.2525	95.1277
100295817	DOCK8	dedicator of cytokinesis 8	39.6008	0.603304	1.51919	0.334974	1.80104	0.0716958	0.186545	22.7301	23.1469	26.436	57.469	27.8292	67.2012	35.1981	37.9889	44.1307	53.8776
780784	TMOD1	tropomodulin 1	57.4398	0.452511	1.36842	0.251258	1.80098	0.0717058	0.186545	36.9364	43.2075	34.8955	54.6657	71.119	65.7243	67.6887	62.1637	71.4917	66.5052
281601	ADCY1	adenylate cyclase 1	127.499	0.398199	1.31786	0.221213	1.80007	0.0718501	0.186777	95.1822	87.9582	143.812	93.9128	126.777	111.51	143.5	124.327	171.227	176.786
512545	ITFG1	integrin alpha FG-GAP repeat containing 1	97.2063	0.555688	1.46987	0.308954	1.79861	0.07208	0.187181	62.5077	38.5782	68.7336	71.4859	149.195	110.033	119.809	101.879	123.566	126.276
539121	KMT2E	lysine methyltransferase 2E	31.0902	0.831806	1.77991	0.462528	1.79839	0.072115	0.187181	12.7857	12.345	12.6893	19.6236	52.5662	39.1392	54.1509	40.5791	47.6611	19.3623
507884	MYOT	myotilin	188.216	0.717347	1.64416	0.39904	1.79768	0.0722272	0.187329	130.698	132.709	53.9295	109.331	283.703	143.264	274.816	298.731	336.276	118.699
511845	ABL2	ABL proto-oncogene 2, non-receptor tyrosine kinase	31.5856	-0.573099	0.672171	0.319258	-1.7951	0.0726379	0.18775	32.6745	55.5525	38.0679	30.837	32.4674	30.2775	25.7217	18.1311	16.7697	35.3572
538401	ARSB	arylsulfatase B	463.541	-0.531963	0.691613	0.296233	-1.79576	0.0725329	0.18775	544.101	600.276	493.825	758.311	344.773	486.655	285.646	176.13	443.955	501.735
509418	CSF1R	colony stimulating factor 1 receptor	39.0344	-0.587348	0.665565	0.327061	-1.79583	0.072521	0.18775	46.8808	50.9232	68.7336	32.2387	35.5595	45.047	18.9528	26.7649	27.361	37.8827
539974	NLRX1	NLR family member X1	489.214	0.419317	1.33729	0.233612	1.79493	0.072665	0.18775	220.198	466.024	586.879	449.941	369.51	635.827	490.743	509.397	569.286	594.338
505735	SEZ6L2	seizure related 6 homolog like 2	43.4246	0.519661	1.43362	0.289413	1.79557	0.0725633	0.18775	34.0951	37.035	26.436	37.8455	42.5168	37.6622	41.967	40.5791	67.0786	69.0307
613915	PDZK1IP1	PDZK1 interacting protein 1	40.4425	0.609198	1.52541	0.339595	1.7939	0.0728297	0.188033	36.9364	20.0606	24.3211	23.8286	53.3393	32.4929	60.2429	39.7157	51.1916	62.296
614006	C8H9orf43	chromosome 8 C9orf43 homolog	63.0234	0.605946	1.52198	0.338054	1.79245	0.0730604	0.188343	44.0395	24.69	61.3315	46.2556	71.892	44.3085	119.809	72.5243	85.6135	59.7705
319141	GCAT	glycine C-acetyltransferase	188.867	-0.519697	0.697518	0.289902	-1.79266	0.0730272	0.188343	242.928	291.651	273.877	186.424	119.047	197.173	171.252	166.633	158.87	80.8164
508137	DNAJC11	DnaJ heat shock protein family (Hsp40) member C11	71.4672	-0.435365	0.739507	0.242942	-1.79205	0.0731245	0.188366	62.5077	129.623	80.3655	77.0926	62.6157	56.8626	60.2429	63.8905	60.0177	61.4542
281797	GNGT2	G protein subunit gamma transducin 2	119.238	-0.538513	0.68848	0.301014	-1.789	0.0736154	0.189487	186.103	151.226	152.271	147.177	70.346	106.34	62.2736	80.2948	86.4961	149.847
516099	HSPB1	heat shock protein family B (small) member 1	63.1331	0.957559	1.94202	0.535802	1.78715	0.073913	0.189945	22.7301	7.71563	31.7232	46.2556	104.359	31.0159	111.686	110.513	116.505	48.8266
514667	MST1	macrophage stimulating 1	32.3822	-0.801749	0.573653	0.448692	-1.78686	0.0739604	0.189945	51.1427	83.3288	38.0679	15.4185	18.5528	23.6312	20.9835	33.672	24.7132	14.3112
614773	ZFP36L1	ZFP36 ring finger protein like 1	41.9929	0.616459	1.53311	0.344924	1.78723	0.0739	0.189945	24.1507	20.0606	31.7232	39.2471	49.4741	70.1551	71.0731	35.3988	44.1307	34.5154
508336	CCDC71	coiled-coil domain containing 71	38.8429	-0.547979	0.683978	0.307124	-1.78423	0.0743868	0.190752	46.8808	55.5525	63.4464	35.0421	30.1483	37.6622	26.3986	41.4425	29.1262	22.7296
535222	EFEMP2	EGF containing fibulin extracellular matrix protein 2	33.3746	-0.681133	0.623675	0.381718	-1.78439	0.0743608	0.190752	51.1427	50.9232	42.2976	30.837	30.9213	32.4929	29.783	21.5846	36.1872	7.57654
540712	FBXL3	F-box and leucine rich repeat protein 3	262.338	0.328208	1.25545	0.184006	1.78367	0.0744765	0.190839	231.563	180.546	271.762	201.842	274.427	219.327	305.953	319.452	304.502	314.006
514896	TRIM56	tripartite motif containing 56	279.123	0.494822	1.40915	0.277755	1.78151	0.0748295	0.1916	177.579	154.313	396.54	238.286	190.939	433.485	319.491	253.835	246.249	380.511
286806	ADAMTS4	ADAM metallopeptidase with thrombospondin type 1 motif 4	100.518	0.43118	1.34834	0.242106	1.78096	0.0749197	0.191687	68.1903	60.1819	94.1122	79.896	122.912	98.2172	132.67	117.42	92.6744	138.903
353112	DBIL5	endozepine-like peptide 2	242.019	-0.439598	0.73734	0.24734	-1.7773	0.0755191	0.193075	306.856	322.513	357.415	211.654	195.577	307.944	182.083	203.759	179.171	153.214
533527	PPP3CC	protein phosphatase 3 catalytic subunit gamma	44.2771	-0.530691	0.692223	0.298989	-1.77495	0.0759058	0.193898	61.0871	70.9838	30.6658	60.2724	40.1977	33.9698	43.3207	26.7649	30.8915	44.6174
512477	ZNF48	zinc finger protein 48	173.575	-0.319245	0.801489	0.179891	-1.77466	0.0759547	0.193898	205.991	231.469	175.535	171.005	180.89	145.48	180.052	161.453	167.697	116.174
281487	PMEL	premelanosome protein	639.417	-0.342776	0.788522	0.193259	-1.77367	0.0761182	0.19417	811.18	790.081	720.117	543.853	710.417	790.907	494.127	440.326	538.394	554.771
510256	SVOP	SV2 related protein	43.351	-0.644278	0.639813	0.363485	-1.7725	0.0763112	0.194516	53.984	78.6994	51.8146	44.8539	35.5595	43.57	16.2453	25.9015	26.4784	56.4031
510738	AFAP1L1	actin filament associated protein 1 like 1	81.8975	-0.418381	0.748264	0.236237	-1.77102	0.0765572	0.194998	117.912	97.217	99.3994	82.6994	71.892	82.7092	48.7358	72.5243	60.0177	85.8675
617628	BATF	basic leucine zipper ATF-like transcription factor	210.284	-0.439356	0.737464	0.248304	-1.76943	0.076822	0.195484	214.515	302.453	250.613	236.885	206.4	141.049	206.45	229.66	218.006	96.8114
513055	RGS2	regulator of G-protein signaling 2, 24kDa	79.9592	0.614719	1.53126	0.347459	1.76918	0.076863	0.195484	79.5553	37.035	42.2976	65.8791	90.4448	146.956	96.1179	44.896	78.5526	117.857
100848920	RGS2	regulator of G protein signaling 2	79.9592	0.614719	1.53126	0.347459	1.76918	0.076863	0.195484	79.5553	37.035	42.2976	65.8791	90.4448	146.956	96.1179	44.896	78.5526	117.857
615333	TMEM87A	transmembrane protein 87A	35.1515	0.641803	1.56028	0.362959	1.76825	0.0770184	0.195678	15.6269	16.9744	24.3211	44.8539	34.7865	22.8927	54.1509	40.5791	47.6611	49.6684
504380	ADNP2	ADNP homeobox 2	79.5585	0.509782	1.42384	0.288517	1.7669	0.0772442	0.195905	63.9284	44.7507	38.0679	75.6909	104.359	94.5248	114.394	101.016	85.6135	73.2399
517111	RDX	radixin	100.127	-0.363487	0.777284	0.205729	-1.76682	0.0772582	0.195905	100.865	80.2426	135.352	107.93	136.827	87.14	85.2877	81.1582	82.0831	104.388
538455	ZNF414	zinc finger protein 414	25.5766	0.580814	1.49569	0.328865	1.76612	0.0773764	0.196059	21.3095	23.1469	20.0914	12.6152	24.737	34.7083	23.0141	31.9452	22.948	41.2501
514354	KATNAL2	katanin catalytic subunit A1 like 2	44.0512	-0.496321	0.708912	0.2814	-1.76376	0.0777732	0.196918	58.2458	46.2938	54.9869	53.264	45.6089	39.1392	46.7052	18.9945	32.6567	44.6174
531488	WASF1	WAS protein family member 1	552.15	-0.260795	0.834628	0.148141	-1.76045	0.0783316	0.198184	680.482	663.544	530.835	639.168	497.833	485.916	431.854	499.9	548.986	542.985
525741	CAMKV	CaM kinase like vesicle associated	449.721	-0.331539	0.794688	0.188386	-1.75989	0.0784266	0.198277	536.998	643.484	392.31	541.05	394.247	346.345	364.842	368.665	421.007	488.266
508944	DUSP11	dual specificity phosphatase 11	24.0446	0.654552	1.57413	0.372159	1.7588	0.078612	0.198305	21.3095	26.2331	12.6893	14.0168	19.3258	19.9388	18.9528	28.4917	44.1307	35.3572
338079	NDUFS7	NADH:ubiquinone oxidoreductase core subunit S7	159.948	-0.393554	0.761252	0.223746	-1.75893	0.0785889	0.198305	167.634	234.555	164.961	182.219	160.018	105.602	172.606	94.1089	154.457	163.317
539038	SEZ6	seizure related 6 homolog	150.806	0.628372	1.54582	0.357208	1.75912	0.0785571	0.198305	83.8172	72.5269	80.3655	105.126	248.144	115.941	280.908	166.633	186.231	168.368
504408	RPS6KA5	ribosomal protein S6 kinase A5	48.0938	0.553245	1.46738	0.314687	1.75808	0.0787338	0.198465	19.8888	21.6038	44.4125	49.0589	57.9775	60.5549	64.9811	56.9834	60.0177	45.4592
507130	LTA4H	leukotriene A4 hydrolase	137.435	-0.36407	0.77697	0.207306	-1.7562	0.0790545	0.198979	150.587	171.287	185.052	149.98	117.501	139.572	114.394	150.229	100.618	95.1277
512062	YRDC	yrdC N6-threonylcarbamoyltransferase domain containing	53.9246	-0.472637	0.720646	0.269103	-1.75634	0.0790298	0.198979	59.6665	94.1307	54.9869	64.4775	41.7438	57.601	37.2288	42.3058	45.0133	42.0919
282272	MAN2B1	mannosidase alpha class 2B member 1	75.0453	-0.482931	0.715523	0.275043	-1.75584	0.079116	0.198987	100.865	104.933	96.2271	86.9044	50.2471	83.4477	69.7193	53.5298	40.6002	63.9797
536818	SLC7A8	solute carrier family 7 member 8	370.911	-0.320944	0.800546	0.182823	-1.75549	0.0791756	0.19899	434.713	535.465	392.31	414.898	285.249	363.33	282.939	339.31	329.215	331.684
511673	MMAA	metabolism of cobalamin associated A	25.6819	0.754413	1.68695	0.429903	1.75484	0.0792859	0.19912	15.6269	16.9744	10.5744	16.8202	34.7865	37.6622	56.1816	26.7649	22.0653	19.3623
282851	DHRS9	dehydrogenase/reductase 9	32.7426	0.722223	1.64972	0.412148	1.75234	0.0797156	0.199617	14.2063	9.25876	28.5509	23.8286	45.6089	22.8927	43.3207	58.7102	41.4828	39.5664
524676	DPY19L2	dpy-19 like 2	130.953	0.434912	1.35183	0.248121	1.75283	0.079632	0.199617	89.4997	70.9838	161.788	107.93	124.458	136.618	163.807	193.398	147.396	113.648
519789	DYNC1LI2	dynein cytoplasmic 1 light intermediate chain 2	39.0614	0.548587	1.46265	0.313036	1.75247	0.0796923	0.199617	15.6269	37.035	26.436	32.2387	46.382	47.2624	62.2736	45.7594	39.7176	37.8827
789389	NELFA	negative elongation factor complex member A	44.6697	-0.418265	0.748324	0.238691	-1.75233	0.0797177	0.199617	58.2458	58.6388	50.7571	36.4438	51.7932	37.6622	45.3514	34.5354	37.0698	36.199
533700	DDX5	DEAD-box helicase 5	73.5994	-0.387592	0.764404	0.221305	-1.75139	0.0798781	0.199733	83.8172	95.6738	93.0548	71.4859	73.4381	70.1551	58.8891	75.9778	69.7265	43.7756
513646	HECTD3	HECT domain E3 ubiquitin protein ligase 3	47.497	0.614296	1.53081	0.351091	1.74968	0.0801743	0.199733	26.992	16.9744	38.0679	33.6404	69.573	76.0629	55.5047	61.3003	55.6047	41.2501
512265	HERPUD2	HERPUD family member 2	56.5387	0.551727	1.46584	0.315053	1.75122	0.0799076	0.199733	41.1983	26.2331	34.8955	53.264	71.892	80.4938	44.6745	53.5298	75.0222	84.1838
327713	NDUFB2	NADH:ubiquinone oxidoreductase subunit B2	157.784	0.395034	1.31497	0.225737	1.74997	0.0801227	0.199733	163.372	106.476	96.2271	149.98	164.656	141.049	156.361	177.857	184.466	237.398
327664	PYGM	glycogen phosphorylase, muscle associated	91.1531	0.696237	1.62027	0.397622	1.751	0.0799453	0.199733	61.0871	27.7763	64.5039	47.6573	144.557	90.8324	164.483	106.196	142.983	61.4542
538774	SUZ12	SUZ12, polycomb repressive complex 2 subunit	134.681	0.363036	1.28613	0.207414	1.75029	0.0800679	0.199733	123.595	117.278	88.825	100.921	156.926	118.156	159.745	146.775	172.11	162.475
618177	SYT11	synaptotagmin 11	257.296	0.36192	1.28513	0.206776	1.7503	0.0800673	0.199733	197.468	214.495	196.684	273.328	243.505	178.711	317.46	316.862	339.806	294.643
534712	RB1	RB transcriptional corepressor 1	60.0021	-0.483929	0.715028	0.276777	-1.74844	0.0803873	0.200117	92.341	66.3544	81.4229	77.0926	34.0134	50.9548	51.4434	48.3495	45.0133	53.0358
510743	ARHGAP18	Rho GTPase activating protein 18	222.193	0.776335	1.71277	0.444162	1.74786	0.0804874	0.20022	122.174	66.3544	82.4804	120.545	425.168	225.973	435.238	176.13	338.041	229.822
508236	IP6K2	inositol hexakisphosphate kinase 2	37.3062	0.550836	1.46493	0.315411	1.7464	0.0807408	0.200704	19.8888	18.5175	26.436	39.2471	45.6089	37.6622	50.7665	44.896	53.8394	36.199
359720	RTN2	reticulon 2	245.624	-0.425841	0.744405	0.243901	-1.74596	0.080818	0.200749	311.118	300.91	363.76	269.123	164.656	297.605	209.158	175.267	166.814	197.832
NA	GYLTL1B	NA	82.6219	0.345793	1.27085	0.198127	1.74532	0.08093	0.200881	69.6109	83.3288	75.0783	56.0674	78.8493	81.9707	85.9646	90.6554	112.092	92.6022
616212	FBXL2	F-box and leucine rich repeat protein 2	62.7259	0.417032	1.33518	0.239397	1.74201	0.0815067	0.202165	36.9364	44.7507	48.6423	72.8876	64.1617	64.2473	64.3042	82.0215	79.4352	69.8725
444870	TLR5	toll like receptor 5	258.882	0.378989	1.30043	0.217657	1.74122	0.0816447	0.20236	180.42	245.357	195.626	215.859	286.795	197.173	343.182	254.698	374.228	295.485
100137087	JMJD7	jumonji domain containing 7	157.43	-0.355993	0.781331	0.204643	-1.73959	0.0819316	0.202924	208.833	225.296	137.467	155.587	157.699	105.602	126.578	145.912	160.636	150.689
614292	AKIRIN2	akirin 2	23.7609	0.863214	1.81909	0.496373	1.73904	0.0820274	0.203013	15.6269	4.62938	16.919	22.4269	23.964	45.7854	23.0141	14.6775	15.0044	55.5613
NA	DYX1C1	NA	123.14	-0.538951	0.688271	0.310192	-1.73747	0.0823037	0.203549	180.42	185.175	131.123	128.955	104.359	57.601	91.3797	71.6609	99.7353	180.995
538425	CTDSPL	CTD small phosphatase like	26.9082	0.730965	1.65975	0.420871	1.73679	0.082424	0.203699	21.3095	10.8019	43.3551	7.00842	17.7798	34.7083	41.967	27.6283	30.0089	34.5154
516426	LUZP1	leucine zipper protein 1	237.298	-0.320314	0.800896	0.184572	-1.73545	0.082662	0.204109	298.332	268.504	285.509	281.738	185.528	262.159	187.498	190.808	209.179	203.725
282354	SLC1A3	solute carrier family 1 member 3	86.6547	0.456006	1.37174	0.262801	1.73518	0.0827098	0.204109	68.1903	66.3544	49.6997	75.6909	104.359	101.91	111.686	67.344	89.144	132.169
617625	RBM43	RNA binding motif protein 43	44.009	0.476951	1.3918	0.274933	1.73479	0.0827785	0.204131	39.7776	41.6644	37.0104	30.837	34.7865	61.2934	32.4906	67.344	49.4264	45.4592
512233	HIPK1	homeodomain interacting protein kinase 1	153.444	-2.97552	0.127139	1.71598	-1.73401	0.0829166	0.204176	450.34	253.073	352.128	11.2135	294.525	5.16932	1.35377	166.633	0	0
497026	PLCZ1	phospholipase C zeta 1	181.608	0.708456	1.63405	0.40856	1.73403	0.0829127	0.204176	76.714	55.5525	78.2506	140.168	336.269	248.128	279.554	193.398	195.058	212.985
280716	AK2	adenylate kinase 2	362.683	-0.28843	0.818792	0.16637	-1.73367	0.0829773	0.204178	440.395	470.654	340.496	412.095	332.404	329.36	272.785	297.868	383.937	346.837
504914	UROD	uroporphyrinogen decarboxylase	38.8867	0.528602	1.44253	0.305008	1.73307	0.0830824	0.204289	24.1507	18.5175	40.1827	25.2303	48.7011	50.9548	48.059	47.4862	48.5437	37.0409
539224	PAK6	p21 (RAC1) activated kinase 6	24.375	-0.728271	0.603627	0.420563	-1.73166	0.0833349	0.204762	21.3095	60.1819	15.8616	28.0337	27.0561	16.2464	11.5071	25.9015	13.2392	24.4133
616477	CHCHD3	coiled-coil-helix-coiled-coil-helix domain containing 3	68.3556	0.576508	1.49124	0.333134	1.73056	0.08353	0.204946	61.0871	47.8369	22.2062	61.6741	81.1684	78.2783	95.441	56.9834	63.5482	115.332
510967	CTSW	cathepsin W	63.207	-0.548116	0.683913	0.316713	-1.73064	0.083516	0.204946	66.7696	100.303	89.8824	74.2892	44.8359	43.57	55.5047	72.5243	59.1351	25.2551
506485	PBXIP1	PBX homeobox interacting protein 1	32.838	0.639944	1.55827	0.370278	1.72828	0.0839376	0.205798	11.365	24.69	38.0679	19.6236	33.2404	20.6773	49.4127	45.7594	47.6611	37.8827
514771	GPATCH3	G-patch domain containing 3	269.513	-0.754986	0.592552	0.437181	-1.72694	0.0841779	0.206239	333.848	385.782	493.825	371.446	108.225	468.193	137.408	118.284	97.9701	180.153
513195	CENPT	centromere protein T	1624.66	-0.331744	0.794575	0.192427	-1.72399	0.0847089	0.207339	1609.57	2382.59	1861.1	1675.01	1525.97	1237.68	1508.1	1205.28	1971.76	1269.49
535065	CUTC	cutC copper transporter	60.3511	-0.520304	0.697225	0.301894	-1.72347	0.0848038	0.207339	59.6665	63.2682	111.031	75.6909	46.382	73.8475	52.7972	40.5791	42.3655	37.8827
515379	MAMDC4	MAM domain containing 4	28.9183	0.652097	1.57145	0.378513	1.72279	0.0849274	0.207339	11.365	12.345	22.2062	29.4354	35.5595	26.5851	38.5825	52.6665	32.6567	27.7806
510395	PHF21A	PHD finger protein 21A	109.579	0.321513	1.24964	0.186649	1.72255	0.0849696	0.207339	96.6029	77.1563	100.457	103.725	108.225	121.848	150.269	113.967	119.153	104.388
506551	POMGNT1	protein O-linked mannose N-acetylglucosaminyltransferase 1 (beta 1,2-)	144.79	-0.462251	0.725853	0.268372	-1.72243	0.084992	0.207339	217.356	180.546	162.846	162.595	116.728	121.848	116.425	71.6609	106.796	191.097
NA	VWA9	NA	78.2535	0.503486	1.41763	0.292279	1.72262	0.0849568	0.207339	45.4602	69.4407	50.7571	50.4606	105.905	122.587	91.3797	78.568	64.4308	103.546
511498	LOC511498	cytochrome P450, family 2, subfamily c	54.8973	0.629157	1.54666	0.36562	1.72079	0.0852884	0.207913	26.992	35.4919	56.0443	29.4354	65.7078	36.9237	71.0731	87.2018	98.8527	41.2501
541158	GDAP1L1	ganglioside induced differentiation associated protein 1 like 1	55.4117	-0.525753	0.694596	0.305829	-1.71911	0.0855944	0.208394	65.349	75.6132	101.514	40.6488	44.0629	50.9548	46.0283	45.7594	54.722	29.4643
281136	LPAR1	lysophosphatidic acid receptor 1	1489.31	0.566886	1.48132	0.32977	1.71904	0.0856077	0.208394	1075.42	1362.58	1025.72	1103.13	1434.75	696.382	1826.24	3274.82	1993.82	1100.28
507844	ACYP1	acylphosphatase 1	113.38	0.512646	1.42666	0.298395	1.71802	0.0857938	0.208697	78.1347	64.8113	54.9869	135.963	132.189	83.4477	127.255	159.726	148.279	149.005
524677	OAZ2	ornithine decarboxylase antizyme 2	120.045	0.34332	1.26867	0.199927	1.71723	0.0859374	0.208898	89.4997	91.0445	124.778	134.562	89.6718	158.034	133.347	144.185	119.153	116.174
507196	SHC1	SHC adaptor protein 1	694.817	-0.528745	0.693157	0.307987	-1.71678	0.0860198	0.208949	720.26	965.997	1211.83	762.516	443.721	895.77	431.854	706.249	476.611	333.368
515069	FKBP3	FK506 binding protein 3	111.051	-0.420335	0.747251	0.244919	-1.71622	0.0861214	0.208972	144.904	121.907	95.1696	149.98	123.685	67.9397	75.8113	84.6117	105.914	140.587
507801	SREK1	splicing regulatory glutamic acid and lysine rich protein 1	24.3281	0.699291	1.62371	0.407499	1.71605	0.086152	0.208972	21.3095	6.17251	15.8616	15.4185	32.4674	30.2775	31.8137	28.4917	18.5349	42.9337
282214	CYP3A5	cytochrome P450, subfamily IIIA (niphedipine oxidase), polypeptide 4	33.8615	0.549916	1.464	0.321202	1.71206	0.0868862	0.210545	21.3095	26.2331	38.0679	15.4185	34.7865	28.8005	38.5825	35.3988	51.1916	48.8266
526682	CYP3A5	cytochrome P450, family 3, subfamily A, polypeptide 5	33.8615	0.549916	1.464	0.321202	1.71206	0.0868862	0.210545	21.3095	26.2331	38.0679	15.4185	34.7865	28.8005	38.5825	35.3988	51.1916	48.8266
617245	PTTG1IP	PTTG1 interacting protein	68.2856	-0.607306	0.656421	0.354765	-1.71185	0.0869239	0.210545	82.3966	87.9582	126.893	67.2808	47.928	74.586	35.875	25.0382	59.1351	75.7654
516190	GSTT2	glutathione S-transferase theta 2	25.4924	-0.556876	0.679773	0.325514	-1.71076	0.0871259	0.210585	29.8332	40.1213	34.8955	30.837	17.0067	24.3697	18.2759	22.448	20.3001	16.8368
514541	RAB13	RAB13, member RAS oncogene family	224.849	-0.700615	0.61531	0.409465	-1.71105	0.087072	0.210585	325.324	325.6	366.932	248.098	126.777	401.73	97.4717	132.961	138.57	85.0256
510615	RPL19	ribosomal protein L19	34.015	-0.489965	0.712042	0.286342	-1.71112	0.0870592	0.210585	26.992	49.38	49.6997	33.6404	38.6516	26.5851	27.7524	28.4917	37.0698	21.8878
519213	PIGV	phosphatidylinositol glycan anchor biosynthesis class V	84.9708	-0.482468	0.715752	0.282181	-1.70978	0.087306	0.210871	100.865	100.303	144.869	78.4943	71.119	112.987	60.9198	65.6172	55.6047	58.9286
533375	ESF1	ESF1 nucleolar pre-rRNA processing protein homolog	25.8154	0.6073	1.52341	0.355293	1.70929	0.087397	0.210941	24.1507	16.9744	8.45952	21.0253	30.9213	28.062	25.0448	36.2622	34.4219	32.8317
525800	CCDC85A	coiled-coil domain containing 85A	29.0372	0.474492	1.38943	0.277919	1.7073	0.087766	0.211534	21.3095	18.5175	24.3211	25.2303	30.9213	33.2314	35.1981	31.9452	32.6567	37.0409
525931	PDGFD	platelet derived growth factor D	29.8273	0.59308	1.50846	0.347379	1.7073	0.0877669	0.211534	26.992	10.8019	14.8042	32.2387	33.2404	26.5851	41.2901	35.3988	43.2481	33.6735
508605	BAG6	BCL2 associated athanogene 6	822.644	-0.599331	0.66006	0.35153	-1.70492	0.0882088	0.211749	1856.76	887.298	845.952	379.856	985.617	325.667	738.483	802.948	758.165	645.69
511446	CXXC1	CXXC finger protein 1	44.9831	0.458573	1.37418	0.268913	1.70529	0.0881412	0.211749	58.2458	35.4919	33.8381	22.4269	39.4247	48.0009	48.7358	50.9397	52.9568	59.7705
100125286	FAM177A1	family with sequence similarity 177 member A1	569.079	-0.306586	0.808553	0.179704	-1.70606	0.0879969	0.211749	687.585	785.451	540.352	517.221	616.88	440.131	521.203	413.561	636.364	532.042
513400	NADSYN1	NAD synthetase 1	223.759	-0.590471	0.664126	0.346422	-1.70448	0.0882908	0.211749	264.237	361.092	345.783	252.303	122.139	294.651	123.87	89.792	160.636	223.087
505220	PTPN9	protein tyrosine phosphatase, non-receptor type 9	183.489	-0.376041	0.770549	0.220503	-1.70538	0.0881233	0.211749	190.364	225.296	232.637	222.868	165.429	149.91	132.67	223.617	181.818	110.281
504987	PYCR2	pyrroline-5-carboxylate reductase 2	529.272	0.383049	1.30409	0.224617	1.70534	0.0881303	0.211749	386.411	348.747	473.733	583.101	504.017	485.178	616.644	417.015	629.303	848.573
618429	TBL3	transducin beta like 3	77.5419	0.570481	1.48502	0.334646	1.70473	0.0882449	0.211749	28.4126	50.9232	93.0548	46.2556	91.2179	59.8165	117.778	93.2455	114.74	79.9746
523858	KCTD19	potassium channel tetramerization domain containing 19	58.4029	0.459998	1.37554	0.270075	1.70322	0.0885261	0.211948	48.3014	50.9232	38.0679	35.0421	71.892	46.5239	69.7193	74.2511	79.4352	69.8725
282020	PTGFR	prostaglandin F receptor	31.1304	0.926826	1.90109	0.544218	1.70304	0.0885606	0.211948	2.84126	16.9744	13.7467	14.0168	57.9775	28.8005	62.2736	28.4917	43.2481	42.9337
518910	ZBTB5	zinc finger and BTB domain containing 5	49.7979	0.692507	1.61609	0.406596	1.70318	0.0885337	0.211948	15.6269	21.6038	23.2637	43.4522	84.2606	61.2934	63.6274	63.0271	49.4264	72.3981
616908	CCSER1	coiled-coil serine rich protein 1	39.7111	0.771026	1.70648	0.453603	1.69978	0.0891721	0.212959	17.0476	16.9744	16.919	21.0253	72.6651	39.1392	69.0424	31.0818	63.5482	49.6684
281069	CHAD	chondroadherin	36.8735	0.487187	1.40171	0.28665	1.69959	0.0892083	0.212959	24.1507	24.69	23.2637	37.8455	42.5168	49.4778	41.967	33.672	41.4828	49.6684
100125835	PCYOX1	prenylcysteine oxidase 1	186.29	-0.463398	0.725276	0.272674	-1.69946	0.0892329	0.212959	272.761	293.194	169.19	173.809	171.613	132.925	127.255	232.25	188.879	101.021
507878	SCAP	SREBF chaperone	42.5587	0.615748	1.53235	0.362159	1.70022	0.0890901	0.212959	31.2539	21.6038	30.6658	23.8286	58.7505	36.1853	54.8278	84.6117	47.6611	36.199
504683	MAK16	MAK16 homolog	73.0372	0.471942	1.38698	0.277784	1.69895	0.0893285	0.213038	56.8252	33.9488	76.1357	49.0589	87.3527	61.2934	88.6722	90.6554	81.2004	105.23
281952	SLC6A15	solute carrier family 6 member 15	37.9693	0.702341	1.62714	0.414399	1.69484	0.0901055	0.214741	5.68252	23.1469	29.6083	57.469	28.6022	44.3085	62.2736	51.8031	40.6002	36.199
513939	GSDMD	gasdermin D	48.2168	0.490861	1.40528	0.289913	1.69314	0.0904297	0.215363	28.4126	30.8625	40.1827	46.2556	53.3393	51.6932	54.8278	56.9834	37.9524	81.6583
535816	FTCD	formimidoyltransferase cyclodeaminase	98.0006	-0.452159	0.730948	0.267295	-1.69161	0.0907204	0.215904	96.6029	174.373	104.687	106.528	85.0336	59.078	85.2877	120.874	77.67	69.8725
511566	EFEMP1	EGF containing fibulin extracellular matrix protein 1	26.98	0.93418	1.9108	0.552424	1.69106	0.0908259	0.216005	15.6269	4.62938	8.45952	11.2135	51.0202	19.2003	59.566	33.672	34.4219	31.9898
507949	GLYCTK	glycerate kinase	29.6549	0.610495	1.52678	0.361542	1.68859	0.0912986	0.216977	34.0951	16.9744	13.7467	21.0253	30.9213	31.0159	25.0448	29.3551	56.4873	37.8827
530188	DBR1	debranching RNA lariats 1	437.172	-0.507894	0.703248	0.300992	-1.6874	0.0915268	0.217368	507.165	799.339	393.368	525.631	342.454	298.344	311.368	254.698	288.615	650.741
NA	UQCC	NA	41.2227	-0.51025	0.702101	0.302546	-1.68652	0.0916959	0.217618	62.5077	43.2075	41.2402	57.469	38.6516	23.6312	48.7358	23.3114	41.4828	31.9898
511956	MAEA	macrophage erythroblast attacher	149.921	-0.454989	0.729516	0.269955	-1.68543	0.0919065	0.217815	152.007	192.891	149.099	255.106	119.047	94.5248	160.422	130.371	162.401	83.3419
541221	ZBTB8A	zinc finger and BTB domain containing 8A	144.023	-0.384627	0.765977	0.228206	-1.68544	0.0919043	0.217815	187.523	191.348	160.731	176.612	101.267	158.034	106.271	101.016	142.101	115.332
513279	PPRC1	peroxisome proliferator-activated receptor gamma, coactivator-related 1	42.0433	0.579618	1.49445	0.344043	1.68472	0.0920418	0.217984	35.5158	24.69	14.8042	30.837	61.0696	46.5239	43.9976	56.12	53.8394	53.0358
404169	PKIG	cAMP-dependent protein kinase inhibitor gamma	24.4049	-0.718145	0.607878	0.426423	-1.68412	0.0921594	0.218111	29.8332	23.1469	54.9869	26.632	17.0067	22.1542	9.47641	17.2677	13.2392	30.3062
100498815	MIR2890	microRNA 2890	35.7416	-0.768567	0.587	0.456605	-1.68322	0.0923323	0.218368	63.9284	69.4407	34.8955	37.8455	20.0989	46.5239	22.3373	11.224	13.2392	37.8827
504657	ARHGAP29	Rho GTPase activating protein 29	305.659	0.373113	1.29514	0.22177	1.68243	0.0924846	0.218577	247.19	259.245	150.157	311.174	363.325	330.098	392.594	319.452	341.571	341.786
507314	POLR3C	RNA polymerase III subunit C	76.6723	0.622221	1.53924	0.369997	1.68169	0.0926287	0.218765	85.2378	26.2331	44.4125	33.6404	110.544	67.9397	101.533	75.9778	105.031	116.174
507472	DRG2	developmentally regulated GTP binding protein 2	37.1066	0.54026	1.45423	0.321326	1.68135	0.0926959	0.218773	28.4126	37.035	28.5509	21.0253	35.5595	22.8927	41.967	56.12	58.2525	41.2501
538491	TMEM178A	transmembrane protein 178A	362.251	-0.267583	0.83071	0.159244	-1.68034	0.0928913	0.219082	393.515	481.455	338.381	396.677	370.283	276.19	347.243	297.004	389.233	332.526
512457	WWP2	WW domain containing E3 ubiquitin protein ligase 2	87.7908	0.532509	1.44644	0.317358	1.67795	0.0933578	0.22003	35.5158	41.6644	98.342	79.896	101.267	75.3244	125.224	82.0215	118.27	120.383
534105	RMND1	required for meiotic nuclear division 1 homolog	25.9701	0.595171	1.51065	0.355021	1.67644	0.0936521	0.220419	21.3095	13.8881	11.6318	26.632	29.3752	24.3697	39.9363	25.9015	39.7176	26.9388
100124498	XPO7	exportin 7	71.7668	-0.353205	0.782843	0.210653	-1.67671	0.0935987	0.220419	106.547	74.0701	67.6762	88.3061	67.2539	63.5088	62.9505	66.4806	65.3134	55.5613
281439	DAG1	dystroglycan 1	178.944	-0.349436	0.784891	0.20908	-1.6713	0.094662	0.222642	262.817	237.641	171.305	182.219	150.741	144.003	170.575	157.999	123.566	188.572
282862	BCAM	basal cell adhesion molecule	145.817	-0.49782	0.708176	0.297978	-1.67066	0.0947882	0.222785	178.999	189.805	234.752	163.997	87.3527	160.988	154.33	117.42	101.501	69.0307
509161	DLGAP5	DLG associated protein 5	137.12	-0.493551	0.710275	0.295606	-1.66962	0.0949938	0.223114	184.682	183.632	163.903	176.612	93.537	91.5709	85.9646	155.409	167.697	68.1889
529246	TTLL9	tubulin tyrosine ligase like 9	45.0439	-0.671315	0.627934	0.402415	-1.66821	0.0952732	0.223616	42.6189	92.5876	38.0679	78.4943	26.2831	21.4158	58.8891	36.2622	23.8306	31.9898
280711	ACR	acrosin	605.279	-0.289861	0.817981	0.173846	-1.66734	0.0954468	0.22387	652.069	799.339	685.221	555.067	638.525	450.47	675.533	461.911	634.599	500.052
281062	CDH2	cadherin 2	36.7916	1.69257	3.23232	1.01593	1.66603	0.0957066	0.22417	22.7301	16.9744	9.51696	35.0421	3.09213	56.1241	61.5967	48.3495	0	114.49
538716	HOXC13	homeobox C13	26.8964	0.604854	1.52082	0.362981	1.66635	0.0956435	0.22417	18.4682	16.9744	15.8616	21.0253	33.2404	36.9237	27.0755	37.1255	17.6523	44.6174
508404	KIF3B	kinesin family member 3B	319.16	0.281707	1.21563	0.169159	1.66533	0.0958463	0.224344	240.087	282.392	292.911	285.944	337.815	412.807	385.149	366.075	272.728	315.689
520173	TMEM120A	transmembrane protein 120A	203.423	-0.371917	0.772755	0.2234	-1.66481	0.0959516	0.224436	251.452	325.6	192.454	231.278	149.195	206.034	160.422	147.639	195.058	175.102
513262	TEX2	testis expressed 2	92.2779	-0.313375	0.804757	0.188283	-1.66438	0.0960368	0.224481	106.547	114.191	117.376	85.5027	88.1257	90.0939	71.0731	81.1582	80.3178	88.393
515889	TM6SF2	transmembrane 6 superfamily member 2	75.7672	-0.446187	0.73398	0.268412	-1.66232	0.0964482	0.225288	98.0235	109.562	101.514	86.9044	42.5168	69.4166	62.2736	69.0708	66.196	52.1939
533378	MYLK2	myosin light chain kinase 2	29.5321	0.542786	1.45678	0.326895	1.66043	0.096828	0.22602	21.3095	27.7763	24.3211	28.0337	19.3258	29.539	31.8137	45.7594	20.3001	47.1429
516915	CD300A	CD300a molecule	23.5133	-0.601185	0.659212	0.362448	-1.65868	0.0971804	0.226688	32.6745	43.2075	33.8381	14.0168	18.5528	17.7234	18.9528	15.5409	22.948	17.6786
527934	CORO7	coronin 7	55.2941	-0.502971	0.705652	0.303595	-1.65672	0.0975769	0.227457	76.714	74.0701	79.308	47.6573	47.155	70.8936	38.5825	46.6228	26.4784	45.4592
515639	RASSF8	Ras association domain family member 8	45.7313	0.5989	1.51456	0.361611	1.6562	0.0976821	0.227547	25.5713	24.69	22.2062	47.6573	60.2966	31.7544	52.7972	47.4862	74.1395	70.7144
281452	RGS7	regulator of G protein signaling 7	33.9203	0.589336	1.50455	0.355941	1.65571	0.0977803	0.22762	29.8332	12.345	28.5509	19.6236	43.2898	26.5851	52.7972	36.2622	51.1916	38.7245
522382	CNNM4	cyclin and CBS domain divalent metal cation transport mediator 4	308.285	-0.249581	0.84114	0.15082	-1.65483	0.0979581	0.227878	350.896	341.031	362.702	329.396	291.433	282.097	275.493	243.474	259.488	346.837
786520	CDHR4	cadherin related family member 4	78.2959	0.359693	1.28315	0.217531	1.65353	0.0982238	0.228046	56.8252	58.6388	67.6762	70.0842	88.1257	81.9707	113.04	76.8412	84.7309	85.0256
404131	HSDL2	hydroxysteroid dehydrogenase like 2	169.626	-0.26871	0.830061	0.162511	-1.65349	0.0982311	0.228046	201.729	191.348	183.995	176.612	173.932	127.756	172.606	132.098	170.344	165.842
768225	NR1D1	nuclear receptor subfamily 1 group D member 1	2492.77	-0.364986	0.776476	0.220678	-1.65393	0.0981423	0.228046	3364.05	2544.62	2929.11	3195.84	1999.84	3225.66	1737.57	2176.59	2128.86	1625.59
614868	KHK	ketohexokinase	59.3657	-0.79934	0.574612	0.483624	-1.65281	0.0983692	0.228211	41.1983	128.079	87.7676	103.725	17.0067	82.7092	23.0141	42.3058	29.1262	38.7245
532719	GDPD5	glycerophosphodiester phosphodiesterase domain containing 5	100.075	0.302089	1.23293	0.18283	1.65229	0.0984745	0.2283	99.4441	69.4407	91.9973	88.3061	97.4021	111.51	94.0873	123.464	116.505	108.597
507005	UBA2	ubiquitin like modifier activating enzyme 2	287.374	-0.702031	0.614706	0.425206	-1.65104	0.098731	0.228739	414.824	371.893	491.71	400.882	101.267	488.132	150.946	187.354	142.983	123.75
281482	DHRS3	dehydrogenase/reductase 3	30.134	0.528418	1.44235	0.320125	1.65066	0.0988076	0.228761	17.0476	16.9744	25.3786	22.4269	39.4247	34.7083	33.1674	45.7594	35.3045	31.148
510681	BSPRY	B-box and SPRY domain containing	55.836	0.59866	1.51431	0.362783	1.65019	0.0989044	0.22883	25.5713	20.0606	66.6187	50.4606	57.9775	62.0319	109.656	51.8031	66.196	47.9848
538751	AREG	amphiregulin	152.677	-0.333066	0.793848	0.202242	-1.64687	0.0995844	0.22981	190.364	146.597	177.65	190.629	146.876	179.449	130.639	109.65	105.914	149.005
783664	NATD1	N-acetyltransferase domain containing 1	23.6239	0.689431	1.61265	0.418574	1.6471	0.0995383	0.22981	8.52378	30.8625	21.1488	7.00842	22.418	23.6312	29.1061	39.7157	35.3045	18.5204
532021	PRMT9	protein arginine methyltransferase 9	25.5211	0.772744	1.70852	0.468988	1.64769	0.0994172	0.22981	19.8888	3.08625	15.8616	26.632	27.8292	25.1081	25.0448	58.7102	18.5349	34.5154
338044	SLC38A2	solute carrier family 38 member 2	234.069	0.276925	1.21161	0.168159	1.64681	0.0995978	0.22981	211.674	200.606	178.707	194.834	270.561	227.45	292.415	239.158	272.728	252.551
540868	CYP26B1	cytochrome P450, family 26, subfamily B, polypeptide 1	43.3142	0.668738	1.58968	0.406274	1.64603	0.099758	0.229999	15.6269	21.6038	24.3211	39.2471	64.9348	56.8626	80.5495	37.9889	60.0177	31.9898
513877	SRBD1	S1 RNA binding domain 1	210.157	0.556438	1.47063	0.338106	1.64575	0.0998146	0.229999	127.857	182.089	99.3994	156.989	282.93	124.064	268.724	380.753	304.502	174.26
534358	UTRN	utrophin	154.067	0.300005	1.23115	0.182336	1.64534	0.0998991	0.230038	130.698	182.089	123.721	130.357	125.231	152.864	165.837	166.633	209.179	154.056
505436	CLIC3	chloride intracellular channel 3	28.7565	0.596586	1.51213	0.362762	1.64457	0.10006	0.230252	15.6269	9.25876	20.0914	35.0421	33.2404	45.047	28.4292	37.9889	30.0089	32.8317
529920	LRGUK	leucine rich repeats and guanylate kinase domain containing	41.5507	0.599772	1.51548	0.36504	1.64303	0.100377	0.230825	35.5158	9.25876	44.4125	25.2303	48.7011	38.4007	41.967	52.6665	68.8439	50.5103
534329	ARL15	ADP ribosylation factor like GTPase 15	123.741	0.584791	1.49982	0.356183	1.64183	0.100626	0.231203	55.4046	86.4151	56.0443	145.775	150.741	200.127	179.375	168.36	124.449	70.7144
535165	LIMCH1	LIM and calponin homology domains 1	178.027	0.445302	1.3616	0.271263	1.64158	0.100676	0.231203	127.857	80.2426	178.707	117.741	245.824	194.219	204.42	247.791	191.527	191.939
509748	LPAR2	lysophosphatidic acid receptor 2	150.927	-0.508942	0.702738	0.310347	-1.63991	0.101023	0.231843	220.198	175.916	213.603	169.604	108.225	212.681	137.408	106.196	100.618	64.8215
519444	CADPS2	calcium dependent secretion activator 2	28.3984	0.628614	1.54608	0.383679	1.63839	0.101341	0.23226	29.8332	18.5175	6.34464	22.4269	34.0134	40.6161	31.1368	38.8523	35.3045	26.9388
505293	MED6	mediator complex subunit 6	137.093	-1.39875	0.379259	0.853581	-1.63868	0.10128	0.23226	180.42	206.779	292.911	290.149	23.964	252.558	26.3986	52.6665	28.2436	16.8368
616080	RNFT1	ring finger protein, transmembrane 1	55.1348	0.450598	1.36661	0.275595	1.635	0.102049	0.233726	38.357	30.8625	39.1253	49.0589	73.4381	79.7553	62.9505	59.5735	62.6656	55.5613
539292	PARD6G	par-6 family cell polarity regulator gamma	29.3286	0.522401	1.43634	0.31958	1.63465	0.102123	0.233736	17.0476	15.4313	17.9765	39.2471	30.1483	33.9698	38.5825	31.9452	34.4219	34.5154
281336	MYF6	myogenic factor 6	34.5024	0.705579	1.6308	0.431866	1.63379	0.102303	0.233991	21.3095	6.17251	34.8955	23.8286	43.2898	49.4778	48.7358	27.6283	64.4308	25.2551
515377	CARD11	caspase recruitment domain family member 11	159.811	-0.366918	0.775437	0.224886	-1.63157	0.102769	0.234205	200.309	171.287	226.292	166.8	136.054	202.342	108.979	131.234	121.801	133.01
530799	CCDC141	coiled-coil domain containing 141	88.696	0.581081	1.49597	0.35599	1.6323	0.102617	0.234205	26.992	44.7507	79.308	84.101	118.274	139.572	112.363	98.4258	120.035	63.1378
522276	FAM160B1	family with sequence similarity 160 member B1	127.223	0.358652	1.28223	0.219729	1.63224	0.102628	0.234205	85.2378	111.105	88.825	135.963	136.054	134.402	192.913	131.234	121.801	134.694
617650	GCHFR	GTP cyclohydrolase I feedback regulator	34.8898	0.543191	1.45719	0.332645	1.63295	0.10248	0.234205	19.8888	26.2331	21.1488	33.6404	40.1977	29.539	45.3514	36.2622	32.6567	63.9797
286865	PIK3R3	phosphoinositide-3-kinase regulatory subunit 3	48.59	0.602825	1.51869	0.369432	1.63176	0.102729	0.234205	28.4126	27.7763	22.2062	33.6404	78.8493	48.7393	68.3656	80.2948	53.8394	43.7756
514175	TMEM144	transmembrane protein 144	78.5925	0.54855	1.46262	0.336248	1.63139	0.102809	0.234205	45.4602	40.1213	60.2741	51.8623	119.047	68.6782	129.962	75.1145	75.0222	120.383
515674	ZNF184	zinc finger protein 184	386.232	-0.515993	0.699312	0.31644	-1.63062	0.102971	0.234419	524.213	680.519	224.177	374.25	470.004	166.895	241.649	346.217	385.702	448.7
NA	DKFZP761E198	NA	55.0635	-0.348289	0.785515	0.213713	-1.6297	0.103164	0.234702	68.1903	52.4663	60.2741	67.2808	60.2966	48.7393	48.059	45.7594	41.4828	58.0868
617708	SLC18A1	solute carrier family 18 member A1	32.6886	0.490652	1.40508	0.30116	1.62921	0.103269	0.234783	19.8888	33.9488	21.1488	22.4269	37.8786	36.1853	50.0896	34.5354	37.9524	32.8317
614242	RAB8B	RAB8B, member RAS oncogene family	70.6921	0.455124	1.3709	0.279868	1.62621	0.103905	0.236071	38.357	60.1819	68.7336	36.4438	91.9909	67.2012	92.7335	79.4314	93.557	78.2909
514442	HARBI1	harbinger transposase derived 1	36.6978	0.52041	1.43436	0.320272	1.6249	0.104183	0.236547	32.6745	29.3194	21.1488	22.4269	44.0629	46.5239	31.1368	63.8905	37.0698	38.7245
100337270	ABCC6	ATP binding cassette subfamily C member 6	283.507	0.314545	1.24362	0.193974	1.62158	0.104893	0.23784	282.705	280.849	206.201	210.253	283.703	263.636	358.073	233.977	348.632	367.041
100337373	SYMPK	symplekin	73.205	-0.514768	0.699905	0.317435	-1.62165	0.104879	0.23784	113.65	80.2426	90.9399	98.1179	48.7011	99.6941	39.9363	45.7594	47.6611	67.347
504317	LRP4	LDL receptor related protein 4	145.074	0.32342	1.25129	0.199861	1.61822	0.105614	0.239318	106.547	97.217	139.582	128.955	169.294	166.895	174.637	131.234	156.223	180.153
787258	FOXE3	forkhead box E3	87.6253	-0.413073	0.751022	0.255359	-1.61762	0.105745	0.239337	80.9759	151.226	91.9973	100.921	76.5302	56.8626	80.5495	57.8468	91.7918	87.5511
539361	SREBF1	sterol regulatory element binding transcription factor 1	34.2836	-0.51116	0.701658	0.316012	-1.61753	0.105763	0.239337	58.2458	37.035	48.6423	35.0421	23.191	33.2314	22.3373	26.7649	23.8306	34.5154
507654	ADAMTSL4	ADAMTS like 4	64.0803	0.504327	1.41846	0.312093	1.61595	0.106105	0.23995	46.8808	52.4663	47.5848	53.264	64.1617	37.6622	95.441	103.606	90.9092	48.8266
102466669	MIR2284Z-1	microRNA 2284z-1	33.7386	-0.63331	0.644695	0.392271	-1.61447	0.106425	0.240387	69.6109	32.4057	31.7232	49.0589	23.191	32.4929	23.691	22.448	12.3566	40.4082
407239	USF1	upstream transcription factor 1	96.466	0.488521	1.40301	0.302601	1.61441	0.106439	0.240387	52.5633	86.4151	59.2167	72.8876	129.096	83.4477	177.344	92.3822	109.444	101.862
281250	IL1A	interleukin 1 alpha	1174.62	-0.273148	0.827512	0.169312	-1.61328	0.106683	0.240751	1181.96	1527.7	1226.63	1519.43	974.021	878.785	1093.17	1244.14	1020.3	1080.08
524683	SAMHD1	SAM and HD domain containing deoxynucleoside triphosphate triphosphohydrolase 1	145.727	-0.339222	0.790467	0.210304	-1.61301	0.106742	0.240751	163.372	155.856	178.707	190.629	126.777	161.726	138.762	131.234	85.6135	124.592
781217	ATMIN	ATM interactor	122.834	-0.34907	0.78509	0.216569	-1.61182	0.107001	0.240918	169.055	172.83	115.261	127.553	105.132	81.2322	110.333	107.06	108.561	131.327
767980	SSR3	signal sequence receptor subunit 3	279.952	-0.299983	0.812262	0.186104	-1.61191	0.106981	0.240918	403.459	287.021	317.232	271.927	265.923	228.927	274.139	221.89	316.858	212.143
509093	TBC1D12	TBC1 domain family member 12	198.342	-0.353997	0.782413	0.219642	-1.6117	0.107028	0.240918	262.817	234.555	189.282	288.747	139.919	214.158	172.606	162.316	163.284	155.74
508148	HPN	hepsin	27.9896	-0.496145	0.708999	0.307975	-1.61099	0.107182	0.241107	32.6745	37.035	35.953	37.8455	20.8719	20.6773	18.2759	21.5846	23.8306	31.148
618428	CACYBP	calcyclin binding protein	67.2728	0.510449	1.42449	0.317084	1.60983	0.107436	0.241518	36.9364	41.6644	37.0104	57.469	102.04	64.9858	71.0731	93.2455	71.4917	96.8114
525051	BRD3	bromodomain containing 3	1375.2	-0.381156	0.767822	0.23692	-1.6088	0.107661	0.241705	1314.08	1800.83	1800.82	1832	1032.77	1394.98	1357.16	1246.73	1298.32	674.312
539311	PPP1R9A	protein phosphatase 1 regulatory subunit 9A	26.6045	0.641062	1.55948	0.398469	1.60881	0.107657	0.241705	18.4682	21.6038	10.5744	16.8202	35.5595	16.9849	43.9976	36.2622	38.835	26.9388
614911	PLA2G5	phospholipase A2 group V	421.741	-0.272015	0.828162	0.169155	-1.60808	0.107818	0.241897	414.824	507.689	405	487.786	491.649	308.682	421.7	310.818	466.02	403.24
516731	RMND5A	required for meiotic nuclear division 5 homolog A	61.7543	-0.414042	0.750518	0.257638	-1.60707	0.10804	0.242077	72.4521	77.1563	95.1696	53.264	54.8853	70.1551	39.9363	47.4862	57.3699	49.6684
515665	TMEM9B	TMEM9 domain family member B	42.6617	0.498337	1.41258	0.31003	1.60738	0.10797	0.242077	22.7301	23.1469	46.5274	44.8539	38.6516	70.1551	46.0283	57.8468	37.9524	38.7245
514261	KIF5B	kinesin family member 5B	91.1343	0.374772	1.29664	0.233356	1.60601	0.108271	0.242117	61.0871	86.4151	64.5039	75.6909	107.452	97.4787	84.6108	88.0652	132.392	113.648
518657	TAL1	TAL bHLH transcription factor 1, erythroid differentiation factor	248.427	0.494113	1.40845	0.30762	1.60624	0.108221	0.242117	187.523	194.434	136.41	228.474	283.703	143.264	293.769	466.228	344.219	206.25
531979	WFIKKN2	WAP, follistatin/kazal, immunoglobulin, kunitz and netrin domain containing 2	43.1076	0.528193	1.44212	0.328756	1.60664	0.108133	0.242117	28.4126	29.3194	34.8955	22.4269	59.5235	39.8776	70.3962	44.0326	61.7829	40.4082
514440	RAD18	RAD18, E3 ubiquitin protein ligase	194.157	0.35712	1.28087	0.222497	1.60506	0.108481	0.242285	163.372	132.709	172.363	126.152	253.555	187.573	263.986	192.535	232.127	217.194
529184	RPAP2	RNA polymerase II associated protein 2	29.9373	0.777495	1.71415	0.484413	1.60503	0.108488	0.242285	14.2063	7.71563	17.9765	16.8202	51.7932	31.0159	64.9811	44.896	24.7132	25.2551
540982	GLE1	GLE1, RNA export mediator	50.48	-0.524116	0.695385	0.327092	-1.60235	0.109078	0.243284	72.4521	52.4663	59.2167	79.896	34.7865	59.078	38.5825	50.9397	21.1827	36.199
513386	LTB4R2	leukotriene B4 receptor 2	30.5551	-0.711773	0.610569	0.444151	-1.60255	0.109035	0.243284	41.1983	60.1819	40.1827	33.6404	15.4607	47.2624	18.2759	13.8142	22.0653	13.4694
507276	DHRS12	dehydrogenase/reductase 12	24.9349	0.68451	1.60716	0.42804	1.59917	0.109782	0.244694	8.52378	6.17251	25.3786	23.8286	30.1483	33.2314	25.7217	44.896	20.3001	31.148
NA	MTL5	NA	55.6235	0.622597	1.53964	0.389827	1.59711	0.110241	0.245556	36.9364	38.5782	14.8042	44.8539	82.7145	39.8776	92.7335	69.0708	60.9003	75.7654
338074	AOX1	aldehyde oxidase 1	110.734	-0.33479	0.7929	0.209741	-1.5962	0.110443	0.245686	127.857	180.546	109.974	107.93	93.537	104.125	95.441	95.8357	94.4396	97.6532
615452	TBC1D19	TBC1 domain family member 19	30.8567	0.511307	1.42534	0.320284	1.59642	0.110395	0.245686	25.5713	21.6038	23.2637	18.2219	37.1056	25.1081	39.2594	47.4862	41.4828	29.4643
514759	ALDH18A1	aldehyde dehydrogenase 18 family member A1	3744.75	-1.08117	0.472647	0.677731	-1.59527	0.110651	0.245988	6364.42	7282.01	1422.26	7958.76	2401.81	6017.09	1932.51	1303.71	2102.39	662.526
509896	ABHD4	abhydrolase domain containing 4	1067.33	-0.39243	0.761845	0.246156	-1.59423	0.110884	0.24624	1143.61	1796.2	1331.32	880.257	907.54	563.456	1014.65	870.292	1054.72	1111.23
513858	TBC1D10B	TBC1 domain family member 10B	33.6346	-0.591327	0.663732	0.370942	-1.59412	0.110909	0.24624	48.3014	64.8113	42.2976	29.4354	18.5528	36.1853	26.3986	20.7212	17.6523	31.9898
618101	IQCA1	IQ motif containing with AAA domain 1	47.6245	0.602505	1.51835	0.378054	1.5937	0.111003	0.246288	35.5158	26.2331	48.6423	21.0253	56.4314	42.8315	106.271	50.9397	53.8394	34.5154
520202	TRIML1	tripartite motif family like 1	35.4461	0.528459	1.44239	0.332069	1.59141	0.111516	0.247266	21.3095	18.5175	42.2976	25.2303	36.3325	28.062	60.9198	40.5791	45.0133	36.199
781865	LLGL1	LLGL1, scribble cell polarity complex component	82.3502	-0.361361	0.77843	0.22719	-1.59057	0.111706	0.247526	98.0235	94.1307	80.3655	124.75	67.2539	78.2783	60.9198	87.2018	63.5482	69.0307
509546	ERGIC3	ERGIC and golgi 3	490.724	0.30313	1.23382	0.190688	1.58966	0.11191	0.247799	414.824	449.05	409.229	405.087	517.159	396.561	557.755	727.833	586.938	442.807
519181	FUK	fucokinase	36.4594	0.426435	1.34391	0.268303	1.58938	0.111975	0.247799	19.8888	29.3194	39.1253	36.4438	30.1483	36.9237	39.2594	48.3495	38.835	46.3011
504367	MCM4	minichromosome maintenance complex component 4	26.3357	0.638651	1.55687	0.401992	1.58871	0.112125	0.24797	11.365	9.25876	23.2637	16.8202	40.1977	31.0159	41.967	31.0818	24.7132	33.6735
539709	FN3K	fructosamine 3 kinase	86.2017	0.570379	1.48491	0.359327	1.58735	0.112433	0.248348	38.357	44.7507	84.5952	60.2724	116.728	58.3395	115.071	80.2948	93.557	170.051
505094	PRODH	proline dehydrogenase (oxidase) 1	161.094	-0.481725	0.716121	0.303484	-1.58731	0.112442	0.248348	254.293	172.83	182.937	234.081	95.8561	202.342	93.4104	114.83	96.2049	164.158
281092	CROT	carnitine O-octanoyltransferase	40.9096	0.482826	1.39748	0.304324	1.58655	0.112614	0.248567	39.7776	26.2331	24.3211	25.2303	53.3393	39.8776	39.2594	49.2129	52.0742	59.7705
519037	PLCE1	phospholipase C epsilon 1	56.225	-0.591033	0.663867	0.373149	-1.58391	0.113215	0.249571	136.381	32.4057	37.0104	65.8791	66.4808	39.1392	43.3207	44.0326	35.3045	62.296
100125285	SNX21	sorting nexin family member 21	125.028	-0.664501	0.630907	0.419514	-1.58398	0.113199	0.249571	159.111	111.105	245.326	197.637	54.1123	196.434	98.1486	69.9342	67.9612	50.5103
617339	FBXO36	F-box protein 36	246.253	-0.305896	0.808939	0.193299	-1.5825	0.113535	0.249994	295.491	268.504	222.062	262.115	312.305	159.511	205.774	276.283	200.353	260.128
505555	VWA7	von Willebrand factor A domain containing 7	58.0103	0.541267	1.45525	0.34205	1.58242	0.113553	0.249994	21.3095	33.9488	65.5613	50.4606	63.3887	98.9556	55.5047	86.3385	60.0177	44.6174
508872	VIPAS39	VPS33B interacting protein, apical-basolateral polarity regulator, spe-39 homolog	24.5838	0.628547	1.54601	0.397378	1.58174	0.11371	0.250176	17.0476	13.8881	21.1488	11.2135	31.6943	25.1081	29.1061	15.5409	42.3655	38.7245
532677	KLK6	kallikrein related peptidase 6	130.073	-0.361309	0.778458	0.228769	-1.57936	0.114253	0.251209	191.785	175.916	109.974	130.357	124.458	94.5248	95.441	115.694	107.679	154.898
534306	MADD	MAP kinase activating death domain	339.829	0.262915	1.1999	0.166512	1.57896	0.114346	0.251251	277.023	299.367	303.485	320.986	343.227	484.439	359.427	366.938	296.558	346.837
539539	RCE1	Ras converting CAAX endopeptidase 1	204.27	-0.453201	0.73042	0.287184	-1.57809	0.114546	0.251528	241.507	310.168	311.945	204.646	113.636	225.973	184.79	195.988	123.566	130.485
613812	RNF168	ring finger protein 168	869.666	-0.432298	0.741081	0.274127	-1.577	0.114796	0.251916	940.457	1364.12	539.295	1190.03	962.426	903.893	827.156	434.282	936.453	598.547
514202	PRMT7	protein arginine methyltransferase 7	201.533	-0.309838	0.806732	0.196528	-1.57656	0.114896	0.251973	228.721	223.753	218.89	267.722	177.798	217.112	167.191	214.119	171.227	128.801
317692	ATP8A1	ATPase phospholipid transporting 8A1	27.0916	-0.522266	0.696277	0.331412	-1.57588	0.115054	0.251996	42.6189	15.4313	34.8955	28.0337	37.8786	17.7234	20.3066	29.3551	19.4175	25.2551
505992	INO80	INO80 complex subunit	318.572	-0.261853	0.834016	0.166213	-1.5754	0.115163	0.251996	403.459	398.127	340.496	332.199	265.15	265.851	305.276	311.682	315.976	247.5
532621	THRA	thyroid hormone receptor alpha	1068.46	-0.379355	0.768781	0.240801	-1.57539	0.115167	0.251996	1537.12	976.799	1284.79	1428.32	814.777	1382.42	685.686	736.467	886.144	952.119
526642	WDR59	WD repeat domain 59	232.079	-0.267939	0.830505	0.170094	-1.57523	0.115202	0.251996	258.555	299.367	234.752	287.345	190.166	195.696	192.913	212.393	238.306	211.301
519522	CEP57L1	centrosomal protein 57 like 1	35.0648	0.45637	1.37209	0.289936	1.57404	0.115479	0.252439	18.4682	29.3194	30.6658	39.2471	30.1483	36.9237	53.4741	35.3988	45.0133	31.9898
520192	EPHA4	EPH receptor A4	81.7786	0.655808	1.5755	0.416753	1.57361	0.115577	0.25249	46.8808	40.1213	48.6423	100.921	80.3954	110.771	37.2288	82.0215	67.0786	203.725
100125300	CCDC157	coiled-coil domain containing 157	31.1556	0.742702	1.67331	0.472104	1.57317	0.115679	0.252551	5.68252	10.8019	35.953	22.4269	40.1977	31.7544	69.0424	37.9889	28.2436	29.4643
100271926	CHST8	carbohydrate sulfotransferase 8	45.6254	0.541203	1.45519	0.344576	1.57063	0.116268	0.253676	22.7301	23.1469	54.9869	42.0505	41.7438	31.0159	74.4575	63.8905	62.6656	39.5664
504820	BLZF1	basic leucine zipper nuclear factor 1	74.05	0.440006	1.35661	0.2804	1.56921	0.116599	0.254235	51.1427	41.6644	87.7676	50.4606	81.1684	90.0939	100.856	52.6665	97.9701	86.7093
533736	NGLY1	N-glycanase 1	650.792	-0.196902	0.872422	0.125736	-1.566	0.117348	0.255541	728.783	688.234	657.728	668.603	731.289	638.042	525.264	606.959	698.147	564.873
664645	TAS2R3	taste 2 receptor member 3	28.3383	0.514101	1.4281	0.328236	1.56625	0.117289	0.255541	21.3095	29.3194	12.6893	22.4269	30.9213	36.1853	35.1981	25.0382	27.361	42.9337
512125	MAPK15	mitogen-activated protein kinase 15	221.522	-0.311921	0.805568	0.199324	-1.5649	0.117607	0.255941	258.555	293.194	216.775	245.295	214.13	137.356	212.542	172.677	255.075	209.618
533145	PHLDB3	pleckstrin homology like domain family B member 3	32.0226	-0.436663	0.738842	0.279109	-1.56449	0.117703	0.255987	28.4126	40.1213	41.2402	29.4354	44.0629	20.6773	28.4292	31.9452	25.5958	30.3062
526282	MRM1	mitochondrial rRNA methyltransferase 1	31.3982	0.523147	1.43709	0.334472	1.5641	0.117794	0.256001	12.7857	16.9744	31.7232	30.837	34.7865	30.2775	30.4599	36.2622	50.309	39.5664
511484	RBSN	rabenosyn, RAB effector	375.641	-0.21393	0.862186	0.136799	-1.56382	0.11786	0.256001	417.665	393.497	467.389	364.438	374.148	392.869	332.351	321.179	365.402	327.475
505993	DLL3	delta like canonical Notch ligand 3	30.0999	0.712114	1.6382	0.45589	1.56203	0.118281	0.256262	8.52378	29.3194	37.0104	19.6236	19.3258	37.6622	26.3986	75.9778	18.5349	28.6225
282469	SEC14L2	SEC14 like lipid binding 2	24.1783	0.813975	1.75805	0.520844	1.5628	0.1181	0.256262	2.84126	13.8881	23.2637	14.0168	32.4674	20.6773	54.1509	29.3551	13.2392	37.8827
504372	TMEM130	transmembrane protein 130	187.524	-0.447485	0.73332	0.286428	-1.5623	0.118218	0.256262	205.991	253.073	246.384	225.671	151.514	172.803	169.899	189.945	196.823	63.1378
317724	USO1	USO1 vesicle transport factor	54.9604	-0.54259	0.686537	0.347282	-1.56239	0.118197	0.256262	76.714	66.3544	42.2976	106.528	35.5595	63.5088	52.7972	41.4425	27.361	37.0409
539767	RASSF5	Ras association domain family member 5	8213.9	-0.392979	0.761555	0.25187	-1.56024	0.118702	0.257012	11343.7	10749.4	7158.87	10989.2	6389.12	6418.08	6917.78	4231.45	7509.28	10432.1
504483	BLMH	bleomycin hydrolase	88.7092	0.357241	1.28097	0.229021	1.55986	0.118794	0.257047	69.6109	70.9838	67.6762	92.5111	87.3527	83.4477	81.2264	120.874	82.0831	131.327
616166	RALGPS1	Ral GEF with PH domain and SH3 binding motif 1	48.0494	0.482177	1.39685	0.309706	1.55689	0.119497	0.258241	31.2539	21.6038	42.2976	36.4438	66.4808	57.601	65.658	57.8468	60.9003	40.4082
616756	SIX3	SIX homeobox 3	80.8266	-0.456089	0.72896	0.292927	-1.557	0.119469	0.258241	129.277	84.8719	59.2167	110.733	84.2606	73.109	67.6887	37.9889	61.7829	99.3369
615582	GGT1	gamma-glutamyltransferase 1	59.8052	0.442572	1.35903	0.284485	1.55569	0.119781	0.258526	44.0395	41.6644	60.2741	37.8455	68.0269	53.1702	84.6108	61.3003	50.309	96.8114
618620	SLC29A4	solute carrier family 29 member 4	711.121	-0.330941	0.795018	0.212707	-1.55585	0.119743	0.258526	741.569	911.988	906.226	948.94	454.543	673.489	494.127	673.44	663.725	643.164
514513	ANKRD35	ankyrin repeat domain 35	40.7795	0.689664	1.61291	0.443759	1.55414	0.120151	0.258997	19.8888	13.8881	21.1488	32.2387	67.2539	32.4929	87.3184	31.9452	49.4264	52.1939
514529	IL27RA	interleukin 27 receptor subunit alpha	175.733	-0.377178	0.769942	0.242894	-1.55285	0.120458	0.259496	211.674	237.641	142.754	235.483	166.202	107.817	122.516	144.185	166.814	222.245
534231	RPN2	ribophorin II	60.9809	-0.566863	0.675083	0.365198	-1.55221	0.120612	0.259662	90.9203	81.7857	85.6527	64.4775	41.7438	62.7704	37.9057	83.7483	40.6002	20.2041
280814	HCK	HCK proto-oncogene, Src family tyrosine kinase	103.466	0.330801	1.25771	0.213172	1.5518	0.12071	0.259709	93.7616	100.303	69.7911	98.1179	96.6291	78.2783	121.163	113.103	127.979	135.536
282126	YWHAH	tyrosine 3-monooxygenase/tryptophan 5-monooxygenase activation protein eta	99.5254	-0.434342	0.740031	0.280002	-1.55121	0.120852	0.259851	133.539	174.373	87.7676	116.34	61.8426	93.7863	66.3349	102.743	78.5526	79.9746
507670	PHOX2A	paired like homeobox 2A	24.2786	0.637514	1.55565	0.411296	1.55001	0.121138	0.260303	17.0476	15.4313	27.4935	4.20505	29.3752	31.7544	32.4906	26.7649	21.1827	37.0409
281515	TBCD	tubulin folding cofactor D	157.138	0.330111	1.25711	0.213266	1.54789	0.121649	0.261235	106.547	103.389	151.214	138.767	193.258	177.972	190.882	139.005	180.936	189.414
505792	MVK	mevalonate kinase	160.77	-0.360815	0.778725	0.233296	-1.5466	0.12196	0.261738	170.476	248.443	155.444	199.039	132.189	96.7402	167.191	132.098	174.757	131.327
788567	LRRN4CL	LRRN4 C-terminal like	173.013	-0.523729	0.695572	0.338803	-1.54582	0.122148	0.261975	103.706	254.616	355.3	189.227	117.501	135.879	127.255	200.305	157.105	89.2348
528744	PAF1	PAF1 homolog, Paf1/RNA polymerase II complex component	30.3937	0.532064	1.446	0.344515	1.54439	0.122495	0.262404	15.6269	20.0606	31.7232	35.0421	21.6449	28.062	43.3207	34.5354	51.1916	22.7296
513868	PRPF19	pre-mRNA processing factor 19	483.339	-0.286312	0.819995	0.185392	-1.54436	0.122501	0.262404	552.625	641.941	594.282	476.573	391.928	409.115	436.592	556.883	360.106	413.342
515536	ABCG5	ATP binding cassette subfamily G member 5	43.7797	0.57714	1.49189	0.37398	1.54324	0.122773	0.262769	42.6189	21.6038	17.9765	42.0505	51.0202	92.3094	45.3514	35.3988	41.4828	47.9848
541061	RAPSN	receptor associated protein of the synapse	63.2585	0.52597	1.4399	0.341011	1.54238	0.12298	0.262769	58.2458	24.69	37.0104	60.2724	78.0763	58.3395	120.486	68.2074	75.9048	51.3521
505038	SAAL1	serum amyloid A like 1	122.686	0.28228	1.21612	0.182945	1.54297	0.122837	0.262769	107.968	87.9582	104.687	121.946	129.096	112.987	124.547	145.049	138.57	154.056
522371	TSPAN15	tetraspanin 15	46.2075	-0.541195	0.687202	0.35083	-1.54261	0.122924	0.262769	93.7616	40.1213	67.6762	35.0421	37.8786	44.3085	50.0896	42.3058	26.4784	24.4133
538617	TRIM2	tripartite motif containing 2	79.7466	-0.377393	0.769827	0.2448	-1.54164	0.123162	0.262993	98.0235	121.907	90.9399	71.4859	69.573	86.4016	61.5967	62.1637	51.1916	84.1838
100139490	SHISA9	shisa family member 9	352.138	-0.365145	0.776391	0.236906	-1.54131	0.123242	0.262998	416.245	530.835	415.574	396.677	224.953	316.067	278.877	260.742	263.019	418.393
533264	SULF2	sulfatase 2	43.7815	0.49825	1.4125	0.323613	1.53965	0.123646	0.263696	31.2539	24.69	30.6658	37.8455	55.6584	67.2012	55.5047	60.4369	46.7785	27.7806
540206	MASTL	microtubule associated serine/threonine kinase like	49.7414	0.557137	1.47135	0.362136	1.53847	0.123933	0.264143	45.4602	18.5175	68.7336	26.632	40.9707	64.9858	83.934	50.0763	64.4308	33.6735
526409	TNR	tenascin R	28.3869	0.482226	1.3969	0.313559	1.53791	0.12407	0.264269	25.5713	18.5175	26.436	14.0168	32.4674	36.1853	33.1674	41.4425	29.1262	26.9388
506192	AP1B1	adaptor related protein complex 1 subunit beta 1	51.8507	0.482368	1.39704	0.313969	1.53636	0.124451	0.264634	26.992	23.1469	42.2976	50.4606	71.119	51.6932	66.3349	74.2511	60.0177	52.1939
540909	C11H2orf42	chromosome 11 C2orf42 homolog	417.976	-0.360963	0.778645	0.235051	-1.53568	0.124618	0.264634	539.84	662.001	352.128	463.957	333.95	242.958	381.764	447.233	363.637	392.296
538533	TIA1	TIA1 cytotoxic granule associated RNA binding protein	124.316	0.377073	1.2987	0.24555	1.53563	0.124629	0.264634	110.809	78.6994	84.5952	91.1095	173.159	149.91	159.745	122.601	122.683	149.847
531649	TRAK1	trafficking kinesin protein 1	96.9784	0.532968	1.4469	0.346982	1.53601	0.124536	0.264634	68.1903	60.1819	45.4699	60.2724	160.018	76.0629	141.469	103.606	151.81	102.704
522691	TTC22	tetratricopeptide repeat domain 22	52.9074	0.575333	1.49002	0.374454	1.53646	0.124426	0.264634	17.0476	24.69	32.7807	53.264	82.7145	56.8626	79.8726	56.12	60.9003	64.8215
541035	ZIC3	Zic family member 3	38.3958	-0.424238	0.745232	0.276321	-1.53531	0.124708	0.264636	29.8332	37.035	42.2976	65.8791	44.8359	31.7544	32.4906	28.4917	31.7741	39.5664
511121	USP47	ubiquitin specific peptidase 47	199.662	0.329265	1.25637	0.214815	1.53278	0.12533	0.26579	167.634	134.252	168.133	158.39	253.555	214.896	215.927	203.759	187.114	292.96
506955	ILVBL	ilvB acetolactate synthase like	143.152	-0.740435	0.598559	0.483299	-1.53204	0.125512	0.265978	152.007	208.322	319.347	151.382	64.9348	283.574	62.9505	68.2074	63.5482	57.245
614489	PRSS16	serine protease 16	2161.95	0.429828	1.34707	0.280605	1.53179	0.125575	0.265978	1397.9	961.368	1643.26	1861.44	3344.14	2570.63	2845.63	2028.95	2373.35	2592.86
513650	PAGR1	PAXIP1 associated glutamate rich protein 1	28.0605	0.500713	1.41491	0.327423	1.52925	0.126202	0.26714	12.7857	15.4313	28.5509	25.2303	32.4674	25.1081	36.5519	36.2622	37.0698	31.148
518121	CDC42BPG	CDC42 binding protein kinase gamma	170.329	-0.413731	0.75068	0.270701	-1.52837	0.126421	0.267438	203.15	209.865	263.303	186.424	111.317	209.727	144.854	161.453	113.857	99.3369
526052	TPP2	tripeptidyl peptidase 2	88.7941	-0.323438	0.799163	0.211943	-1.52606	0.126994	0.268483	115.071	95.6738	102.572	93.9128	86.5797	67.9397	71.0731	73.3877	70.6091	111.123
540038	GPR18	G protein-coupled receptor 18	26.6384	0.573762	1.4884	0.376079	1.52564	0.127099	0.268539	11.365	12.345	27.4935	18.2219	35.5595	24.3697	30.4599	30.2185	30.8915	45.4592
537619	KTN1	kinectin 1	785.558	-0.281303	0.822847	0.184458	-1.52503	0.127252	0.268695	927.672	1083.27	673.59	822.788	803.954	618.103	813.618	594.009	890.557	628.011
515670	ASPSCR1	ASPSCR1, UBX domain containing tether for SLC2A4	29.2946	-0.719642	0.607248	0.472431	-1.52327	0.12769	0.269454	35.5158	33.9488	42.2976	7.00842	62.6157	11.0771	25.0448	27.6283	32.6567	15.1531
617564	DHDH	dihydrodiol dehydrogenase	308.686	-0.386053	0.76522	0.253934	-1.52029	0.128439	0.270659	393.515	425.903	399.712	305.567	225.726	416.5	274.816	189.945	231.245	223.929
507359	IL6R	interleukin 6 receptor	70.2877	0.42609	1.34359	0.280431	1.51941	0.128658	0.270659	58.2458	40.1213	50.7571	50.4606	98.1752	77.5399	104.241	60.4369	82.0831	80.8164
536409	PAPSS2	3'-phosphoadenosine 5'-phosphosulfate synthase 2	151.935	0.459711	1.37527	0.302491	1.51975	0.128574	0.270659	107.968	86.4151	63.4464	159.792	220.314	151.387	200.358	162.316	188.879	178.47
514642	TRPM7	transient receptor potential cation channel subfamily M member 7	449.651	-0.265151	0.832112	0.174475	-1.51971	0.128584	0.270659	481.594	603.362	393.368	508.811	468.458	313.852	421.7	385.07	422.772	497.526
NA	WBSCR17	NA	83.0807	-0.337403	0.791465	0.221949	-1.52018	0.128465	0.270659	78.1347	87.9582	99.3994	119.143	79.6224	86.4016	64.3042	57.8468	67.0786	90.9185
616350	CD177	CD177 molecule	37.075	-0.515421	0.699589	0.339592	-1.51777	0.129073	0.270743	44.0395	46.2938	46.5274	56.0674	26.2831	39.1392	36.5519	39.7157	16.7697	19.3623
505709	ERBB2	erb-b2 receptor tyrosine kinase 2	92.0484	0.470505	1.38559	0.310016	1.51768	0.129095	0.270743	61.0871	58.6388	43.3551	88.3061	132.962	96.0017	150.946	88.0652	107.679	93.444
541004	NRP2	neuropilin 2	25.6087	-0.432314	0.741072	0.284632	-1.51885	0.1288	0.270743	28.4126	35.4919	27.4935	30.837	25.5101	24.3697	20.9835	18.9945	22.948	21.0459
506238	PSMC1	proteasome 26S subunit, ATPase 1	164.125	-0.365365	0.776272	0.240655	-1.51821	0.128962	0.270743	170.476	265.418	185.052	186.424	118.274	109.294	150.946	115.694	172.992	166.684
614946	SLC39A13	solute carrier family 39 member 13	164.85	0.45833	1.37395	0.301917	1.51807	0.128998	0.270743	178.999	75.6132	117.376	123.348	197.896	145.48	295.799	192.535	197.705	123.75
539566	NIPBL	NIPBL, cohesin loading factor	68205.9	-0.345131	0.787237	0.227494	-1.5171	0.129243	0.270885	78231.3	93430.1	63539.5	81955.1	64472.5	42194.2	49814.8	46275.7	85231.3	76914.5
533726	DHCR24	24-dehydrocholesterol reductase	56.733	0.454014	1.36985	0.299388	1.51648	0.129399	0.271045	28.4126	37.035	41.2402	51.8623	78.8493	73.109	72.4269	45.7594	67.0786	71.5562
504958	EIF4A1	eukaryotic translation initiation factor 4A1	67.9737	-0.421059	0.746876	0.277829	-1.51553	0.129638	0.271379	79.5553	108.019	76.1357	77.0926	49.4741	62.0319	46.7052	82.0215	59.1351	39.5664
281678	CEBPD	CCAAT enhancer binding protein delta	85.9505	0.537882	1.45184	0.355117	1.51466	0.129858	0.271444	68.1903	55.5525	37.0104	96.7162	92.7639	102.648	85.9646	46.6228	100.618	173.419
538650	NLN	neurolysin	36.8307	0.640654	1.55904	0.422896	1.51492	0.129792	0.271444	35.5158	12.345	16.919	35.0421	43.2898	31.0159	35.1981	40.5791	30.0089	88.393
507148	REST	RE1-silencing transcription factor	384.511	-0.269078	0.82985	0.177672	-1.51447	0.129908	0.271444	454.602	484.542	341.553	458.351	364.098	268.805	367.549	309.092	385.702	410.817
784605	ADAM15	ADAM metallopeptidase domain 15	3207.53	-0.366881	0.775457	0.242434	-1.51332	0.130198	0.271812	3713.53	5050.65	2997.84	3463.56	2841.67	1859.48	2852.4	2195.59	2853.49	4247.07
505124	LMF1	lipase maturation factor 1	93.5914	-0.412717	0.751208	0.272754	-1.51314	0.130243	0.271812	122.174	162.028	104.687	75.6909	71.119	67.9397	79.8726	107.06	84.7309	60.6123
511727	LRRC49	leucine rich repeat containing 49	59.2391	0.664707	1.58525	0.439408	1.51273	0.130348	0.271863	19.8888	20.0606	40.1827	44.8539	102.04	42.8315	103.564	53.5298	100.618	64.8215
505359	PRRC2C	proline rich coiled-coil 2C	1073.27	-0.275283	0.826288	0.182184	-1.51101	0.130785	0.272609	1227.42	1516.89	1132.52	1100.32	902.129	923.832	1125.66	1081.82	994.705	727.348
100296635	USH2A	usherin	59.7819	0.403084	1.32233	0.26689	1.5103	0.130967	0.272821	36.9364	43.2075	39.1253	53.264	82.7145	62.0319	73.7807	66.4806	66.196	74.0817
505096	APBB1	amyloid beta precursor protein binding family B member 1	62.1832	0.377534	1.29912	0.250139	1.5093	0.131223	0.27302	65.349	49.38	40.1827	67.2808	49.4741	71.6321	84.6108	67.344	79.4352	47.1429
512045	C5	complement C5	24.9217	-0.574535	0.671502	0.380614	-1.5095	0.131172	0.27302	42.6189	40.1213	27.4935	11.2135	27.8292	20.6773	14.8915	23.3114	14.1218	26.9388
518393	AOX4	aldehyde oxidase 1-like	68.1359	0.488148	1.40264	0.323515	1.50889	0.131327	0.273071	36.9364	54.0094	52.872	49.0589	88.8988	44.3085	73.7807	82.8849	71.4917	127.118
507761	GARNL3	GTPase activating Rap/RanGAP domain like 3	69.9123	0.516002	1.42999	0.342584	1.5062	0.132015	0.273666	41.1983	47.8369	32.7807	61.6741	102.813	81.9707	104.917	47.4862	72.3743	106.072
541100	PLEKHH3	pleckstrin homology, MyTH4 and FERM domain containing H3	83.6155	0.421502	1.33932	0.279805	1.50641	0.131961	0.273666	71.0315	35.4919	68.7336	68.6825	111.317	110.033	115.071	75.9778	83.8483	95.9695
524361	PPP2CB	protein phosphatase 2 catalytic subunit beta	50.2043	0.420173	1.33809	0.278879	1.50665	0.131901	0.273666	25.5713	44.7507	48.6423	56.0674	39.4247	48.0009	42.6439	62.1637	56.4873	78.2909
535342	SLK	STE20 like kinase	52.4045	0.380504	1.3018	0.252483	1.50705	0.131798	0.273666	44.0395	55.5525	42.2976	37.8455	47.928	71.6321	43.3207	67.344	45.8959	68.1889
517544	UBE4A	ubiquitination factor E4A	409.925	0.30936	1.23916	0.205354	1.50647	0.131947	0.273666	363.681	358.005	373.276	302.764	431.352	295.39	485.328	385.07	580.76	523.623
512887	FAM149A	family with sequence similarity 149 member A	28.4152	0.425648	1.34318	0.282691	1.5057	0.132144	0.273767	24.1507	18.5175	22.2062	25.2303	30.1483	27.3236	33.1674	31.9452	34.4219	37.0409
507880	SEC31B	SEC31 homolog B, COPII coat complex component	4723.5	-0.349737	0.784727	0.232474	-1.50441	0.132475	0.274286	5387.03	5825.3	3894.55	7427.52	3933.96	5574.75	4191.96	4237.49	4007.95	2754.49
511575	GPX8	glutathione peroxidase 8 (putative)	26.1198	0.627044	1.5444	0.41725	1.5028	0.13289	0.274979	15.6269	23.1469	11.6318	18.2219	33.2404	16.9849	35.875	51.8031	35.3045	19.3623
538495	ILDR1	immunoglobulin like domain containing receptor 1	371.633	-0.300152	0.812167	0.199902	-1.5015	0.133227	0.275508	396.356	382.695	333.094	605.527	334.723	288.744	364.842	290.097	356.576	363.674
281105	CTSB	cathepsin B	183.586	-0.587204	0.665632	0.391421	-1.50019	0.133566	0.276043	250.031	336.402	217.833	140.168	158.472	222.281	119.132	39.7157	126.214	225.613
506715	KATNA1	katanin catalytic subunit A1	34.5767	0.580769	1.49565	0.388536	1.49476	0.134977	0.278788	29.8332	9.25876	23.2637	22.4269	51.7932	29.539	42.6439	57.8468	37.0698	42.0919
535305	ALKBH7	alkB homolog 7	25.25	-0.548332	0.68381	0.367067	-1.49382	0.135222	0.279126	46.8808	30.8625	30.6658	25.2303	17.0067	24.3697	17.5991	18.1311	29.1262	12.6276
317708	HTR4	5-hydroxytryptamine receptor 4	74.8577	-0.377499	0.769771	0.252851	-1.49297	0.135445	0.279417	92.341	89.5013	112.089	53.264	75.7572	75.3244	62.2736	56.9834	48.5437	82.5001
514003	CDC40	cell division cycle 40	35.672	0.556191	1.47038	0.372704	1.49231	0.135617	0.279448	11.365	21.6038	35.953	23.8286	49.4741	39.8776	35.1981	37.9889	63.5482	37.8827
513530	OXSM	3-oxoacyl-ACP synthase, mitochondrial	328.45	-0.359322	0.779531	0.240786	-1.49229	0.135624	0.279448	355.158	404.299	384.908	389.668	312.305	338.221	230.818	211.529	203.001	454.592
505503	ASCC2	activating signal cointegrator 1 complex subunit 2	72.8173	0.563077	1.47742	0.377557	1.49137	0.135864	0.279774	49.7221	30.8625	38.0679	40.6488	132.189	76.0629	114.394	73.3877	78.5526	94.2858
511844	EIF2D	eukaryotic translation initiation factor 2D	1000.45	0.46732	1.38254	0.31343	1.49098	0.135966	0.279814	887.894	469.11	354.243	1185.82	1301.01	1332.21	1033.61	1124.99	1124.45	1191.2
507311	DYNC2LI1	dynein cytoplasmic 2 light intermediate chain 1	168.046	-0.242734	0.845142	0.162908	-1.49001	0.136223	0.280173	178.999	189.805	164.961	194.834	182.436	150.649	150.269	179.584	167.697	121.225
513632	RCBTB2	RCC1 and BTB domain containing protein 2	68.573	0.442088	1.35857	0.2975	1.48601	0.137277	0.28217	53.984	46.2938	33.8381	72.8876	82.7145	56.8626	81.9033	78.568	113.857	64.8215
100124517	KHNYN	KH and NYN domain containing	361.297	-0.297724	0.813535	0.200515	-1.4848	0.137598	0.28266	464.546	557.069	334.151	356.028	282.93	296.128	303.922	329.813	359.224	329.159
404115	KRT6B	keratin 6B	74.576	0.310802	1.2404	0.209488	1.48363	0.137907	0.282955	48.3014	66.3544	81.4229	60.2724	74.9842	84.9246	89.349	78.568	90.0266	71.5562
520318	PFAS	phosphoribosylformylglycinamidine synthase	26.8845	0.530593	1.44452	0.357621	1.48367	0.137895	0.282955	25.5713	20.0606	7.40208	30.837	26.2831	26.5851	28.4292	34.5354	38.835	30.3062
506290	IQCK	IQ motif containing K	42.2716	0.465258	1.38056	0.313782	1.48274	0.138143	0.283269	31.2539	29.3194	31.7232	33.6404	50.2471	45.7854	41.967	82.0215	39.7176	37.0409
506367	FAM124B	family with sequence similarity 124 member B	102.448	-0.453915	0.730059	0.306419	-1.48135	0.138512	0.283854	132.119	117.278	115.261	173.809	54.8853	104.863	65.658	102.743	100.618	57.245
514720	OSMR	oncostatin M receptor	40.102	0.539235	1.4532	0.364327	1.48009	0.13885	0.284376	51.1427	20.0606	23.2637	40.6488	28.6022	53.1702	20.3066	62.1637	50.309	51.3521
533147	PPP2R3C	protein phosphatase 2 regulatory subunit B''gamma	223.388	-0.325991	0.79775	0.220414	-1.47899	0.139142	0.284461	252.872	327.143	241.096	249.5	173.932	228.189	175.314	153.682	170.344	261.812
280934	SULT1E1	sulfotransferase family 1E member 1	1718.31	-0.364261	0.776867	0.246272	-1.4791	0.139113	0.284461	1605.31	2885.65	1765.93	2183.82	1231.44	1323.35	1352.42	1103.41	1728.16	2003.57
618784	TBC1D22A	TBC1 domain family member 22A	190.199	-0.312588	0.805196	0.211268	-1.47958	0.138985	0.284461	207.412	239.185	225.235	245.295	138.373	183.88	158.391	156.273	133.275	214.669
531552	ACSS3	acyl-CoA synthetase short chain family member 3	263.404	-0.378286	0.769351	0.255861	-1.47848	0.139278	0.284508	296.912	439.791	256.958	291.55	204.854	155.818	224.05	185.628	330.98	247.5
281839	ICAM1	intercellular adhesion molecule 1	349.613	-0.470445	0.721742	0.318238	-1.47828	0.139332	0.284508	359.419	621.88	487.48	225.671	336.269	127.018	312.045	363.485	280.671	382.194
509513	LOC509513	uncharacterized LOC509513	217.806	-0.300401	0.812027	0.203298	-1.47763	0.139506	0.284521	312.539	245.357	236.867	238.286	170.84	171.326	226.08	170.087	238.306	168.368
535916	SMAD7	SMAD family member 7	376.309	-0.316446	0.803046	0.214141	-1.47775	0.139475	0.284521	393.515	564.784	414.517	426.112	289.887	228.189	370.257	370.392	382.172	323.266
280737	BTC	betacellulin	145.391	-0.488243	0.712893	0.330729	-1.47626	0.139874	0.284931	113.65	209.865	195.626	196.236	133.735	152.864	79.1957	69.9342	85.6135	217.194
538672	THPO	thrombopoietin	67.3391	0.556102	1.47029	0.376691	1.47628	0.139868	0.284931	42.6189	44.7507	75.0783	43.4522	65.7078	64.2473	100.856	101.016	112.092	23.5715
407183	PFKFB3	6-phosphofructo-2-kinase/fructose-2,6-biphosphatase 3	38.9919	0.467277	1.3825	0.316595	1.47595	0.139958	0.284932	18.4682	23.1469	43.3551	25.2303	51.0202	42.8315	45.3514	55.2566	41.4828	43.7756
540914	MPPED2	metallophosphoesterase domain containing 2	38.5432	0.594892	1.51036	0.403557	1.47412	0.140449	0.285761	14.2063	37.035	17.9765	26.632	56.4314	30.2775	48.7358	67.344	56.4873	30.3062
537016	CPEB3	cytoplasmic polyadenylation element binding protein 3	39.5874	0.481964	1.39664	0.327029	1.47377	0.140545	0.285786	26.992	27.7763	35.953	37.8455	36.3325	36.9237	71.0731	54.3932	45.0133	23.5715
526884	WDR6	WD repeat domain 6	152.704	-0.294079	0.815593	0.199688	-1.47269	0.140834	0.286202	170.476	205.236	175.535	166.8	125.231	132.925	167.191	110.513	117.388	155.74
517887	CYTH4	cytohesin 4	34.4233	0.689224	1.61242	0.468187	1.47211	0.140991	0.286304	12.7857	9.25876	21.1488	32.2387	54.8853	48.7393	65.658	22.448	28.2436	48.8266
510219	TOMM40	translocase of outer mitochondrial membrane 40	56.7032	-0.488588	0.712723	0.331947	-1.47189	0.141052	0.286304	95.1822	81.7857	69.7911	49.0589	36.3325	56.1241	48.7358	56.9834	50.309	22.7296
507840	SSNA1	SS nuclear autoantigen 1	34.2159	-0.575055	0.67126	0.392038	-1.46683	0.142421	0.288912	45.4602	50.9232	41.2402	46.2556	21.6449	24.3697	29.1061	9.49723	27.361	46.3011
280808	GPI	glucose-6-phosphate isomerase	71.8448	-0.3325	0.794159	0.226749	-1.46638	0.142545	0.28899	95.1822	91.0445	85.6527	71.4859	57.9775	50.9548	58.2123	60.4369	76.7874	70.7144
511644	TPMT	thiopurine S-methyltransferase	176.239	-0.263153	0.833265	0.179801	-1.46358	0.14331	0.290369	205.991	216.038	185.052	201.842	153.834	149.91	143.5	138.142	204.766	163.317
282301	PDGFRA	platelet derived growth factor receptor alpha	279.898	-0.25445	0.838306	0.173899	-1.46321	0.143411	0.2904	326.745	344.117	268.59	312.576	272.881	304.252	284.292	189.945	231.245	264.337
510374	ZNF609	zinc finger protein 609	34.7769	0.45608	1.37181	0.311823	1.46262	0.14357	0.290551	18.4682	24.69	34.8955	32.2387	35.5595	50.9548	50.7665	41.4425	32.6567	26.097
512817	ARHGAP1	Rho GTPase activating protein 1	130.063	-0.33729	0.791527	0.230658	-1.46229	0.143661	0.290562	120.754	132.709	170.248	182.219	120.593	140.31	110.333	101.879	76.7874	144.796
510878	ESRP2	epithelial splicing regulatory protein 2	34.6412	0.417721	1.33582	0.285902	1.46106	0.143999	0.290791	18.4682	26.2331	28.5509	40.6488	34.0134	45.7854	42.6439	37.1255	30.0089	42.9337
617638	HES7	hes family bHLH transcription factor 7	64.5864	0.34403	1.2693	0.235485	1.46095	0.14403	0.290791	58.2458	37.035	57.1018	64.4775	66.4808	91.5709	58.2123	71.6609	65.3134	75.7654
282291	NFKBIA	NFKB inhibitor alpha	38.7175	-0.397863	0.758982	0.272267	-1.4613	0.143934	0.290791	51.1427	40.1213	38.0679	47.6573	43.2898	37.6622	29.1061	20.7212	42.3655	37.0409
504844	RPA1	replication protein A1	98.1767	-0.344579	0.787538	0.236333	-1.45802	0.144834	0.292241	69.6109	145.054	109.974	134.562	91.2179	99.6941	87.3184	71.6609	75.0222	97.6532
515515	SYK	spleen associated tyrosine kinase	69.5132	-0.350179	0.784487	0.240303	-1.45724	0.14505	0.292503	75.2934	112.648	78.2506	74.2892	51.0202	64.9858	62.9505	63.8905	51.1916	60.6123
535383	RAPGEF3	Rap guanine nucleotide exchange factor 3	86.125	0.333508	1.26007	0.228996	1.45639	0.145284	0.292629	68.1903	52.4663	96.2271	79.896	82.7145	69.4166	116.425	97.5625	102.383	95.9695
540154	TRIM59	tripartite motif containing 59	78.3974	-0.419973	0.747439	0.288328	-1.45658	0.145232	0.292629	83.8172	148.14	103.629	54.6657	59.5235	67.2012	72.4269	59.5735	79.4352	55.5613
508491	CSTF3	cleavage stimulation factor subunit 3	136.346	0.355217	1.27918	0.244033	1.45561	0.1455	0.292719	106.547	66.3544	148.042	106.528	167.748	142.526	167.868	163.18	127.979	166.684
533430	TRIP4	thyroid hormone receptor interactor 4	257.946	-0.271119	0.828677	0.18622	-1.45591	0.145419	0.292719	312.539	344.117	268.59	297.157	190.939	260.682	211.189	216.71	223.301	254.235
517831	KLHL18	kelch like family member 18	233.097	-0.364904	0.776521	0.250962	-1.45402	0.145941	0.293433	279.864	325.6	310.887	248.098	149.195	271.02	182.759	231.387	192.41	139.745
533653	CSPG4	chondroitin sulfate proteoglycan 4	137.589	-0.286773	0.819734	0.197382	-1.45288	0.146257	0.293889	171.896	145.054	187.167	121.946	129.87	132.187	101.533	132.961	106.796	146.48
407154	GJB2	gap junction protein beta 2	111.871	0.413523	1.33193	0.284682	1.45258	0.146341	0.293889	100.865	47.8369	104.687	92.5111	132.189	106.34	192.913	113.967	129.744	97.6532
282359	SLC2A4	solute carrier family 2 member 4	123.792	-0.315158	0.803763	0.217112	-1.45159	0.146615	0.294266	117.912	199.063	124.778	149.98	96.6291	104.863	106.271	120.01	117.388	101.021
NA	LECT1	NA	29.0528	-0.51346	0.70054	0.353873	-1.45098	0.146787	0.294437	39.7776	38.5782	27.4935	46.2556	20.0989	22.8927	36.5519	18.1311	25.5958	15.1531
512993	WDR77	WD repeat domain 77	123.412	0.368507	1.29102	0.254295	1.44913	0.147302	0.295296	72.4521	109.562	94.1122	105.126	155.38	110.033	121.163	111.377	174.757	180.153
281685	CHRM3	cholinergic receptor muscarinic 3	29.6938	0.532346	1.44628	0.367843	1.44721	0.147838	0.29532	15.6269	32.4057	19.0339	19.6236	34.0134	16.9849	39.9363	45.7594	43.2481	30.3062
505569	CLCN2	chloride voltage-gated channel 2	5249.15	-0.274675	0.826637	0.189834	-1.44692	0.14792	0.29532	5725.14	6103.06	4363	6474.38	6071.4	3183.57	5362.97	5286.5	5657.55	4263.91
540019	KDF1	keratinocyte differentiation factor 1	41.883	-0.594856	0.662111	0.410881	-1.44776	0.147685	0.29532	44.0395	72.5269	78.2506	39.2471	18.5528	57.601	22.3373	23.3114	32.6567	30.3062
511329	PARP6	poly(ADP-ribose) polymerase family member 6	89.7717	0.407565	1.32645	0.281387	1.44842	0.147501	0.29532	83.8172	66.3544	44.4125	58.8707	130.643	102.648	115.748	103.606	102.383	89.2348
534228	PRPF6	pre-mRNA processing factor 6	66.9345	-0.492195	0.710942	0.339962	-1.4478	0.147674	0.29532	144.904	69.4407	76.1357	61.6741	40.1977	60.5549	60.9198	34.5354	49.4264	71.5562
282333	PTPN13	protein tyrosine phosphatase, non-receptor type 13	320.295	-0.298776	0.812942	0.206418	-1.44743	0.147777	0.29532	423.348	371.893	340.496	357.429	275.2	345.606	261.278	214.983	233.893	378.827
531379	TMEM30C	transmembrane protein 30C	60.2109	0.61087	1.52718	0.422104	1.4472	0.14784	0.29532	21.3095	49.38	95.1696	19.6236	51.7932	98.9556	87.9953	49.2129	88.2614	40.4082
282006	PROS1	protein S	41.9864	0.485692	1.40026	0.335919	1.44586	0.148217	0.295739	24.1507	44.7507	26.436	26.632	51.7932	31.0159	35.875	68.2074	52.0742	58.9286
781942	SECTM1	secreted and transmembrane 1	80.8234	-0.377864	0.769576	0.261468	-1.44516	0.148412	0.295782	73.8728	129.623	96.2271	89.7078	68.0269	62.7704	56.1816	51.8031	88.2614	91.7603
511631	UBE2Q2	ubiquitin conjugating enzyme E2 Q2	23.8432	0.67141	1.59263	0.464563	1.44525	0.148388	0.295782	24.1507	4.62938	6.34464	21.0253	34.7865	27.3236	29.1061	27.6283	24.7132	38.7245
533631	CHRDL2	chordin like 2	23.5577	0.536677	1.45063	0.371733	1.44372	0.148818	0.296418	17.0476	10.8019	16.919	18.2219	31.6943	19.9388	37.2288	35.3988	25.5958	22.7296
535298	GRB2	growth factor receptor bound protein 2	41.4252	0.412443	1.33094	0.285757	1.44334	0.148925	0.296459	38.357	23.1469	47.5848	32.2387	35.5595	62.7704	40.6132	53.5298	46.7785	33.6735
617958	C25H7orf61	chromosome 25 C7orf61 homolog	28.6871	-0.63943	0.641967	0.443285	-1.44248	0.149167	0.296594	48.3014	46.2938	44.4125	26.632	10.0494	37.6622	24.3679	18.9945	15.0044	15.1531
532834	TRPC4AP	transient receptor potential cation channel subfamily C member 4 associated protein	336.181	-0.342894	0.788458	0.237709	-1.44249	0.149164	0.296594	446.078	444.42	389.138	361.634	240.413	429.792	276.847	201.169	288.615	283.699
539703	P2RY6	pyrimidinergic receptor P2Y6	40.141	0.354543	1.27858	0.246043	1.44098	0.14959	0.297261	36.9364	26.2331	39.1253	30.837	41.7438	48.7393	46.7052	38.8523	46.7785	45.4592
527318	PACRGL	parkin coregulated like	34.7335	0.807547	1.75023	0.56101	1.43945	0.150023	0.297947	15.6269	6.17251	12.6893	46.2556	44.8359	53.9087	38.5825	8.63385	60.0177	60.6123
614456	KRT6A	keratin 6A	192.131	-0.265299	0.832026	0.184385	-1.43883	0.150198	0.298122	257.134	225.296	170.248	207.449	190.166	186.096	159.745	155.409	150.044	219.72
533581	CMYA5	cardiomyopathy associated 5	235.767	-0.313416	0.804734	0.218408	-1.435	0.151286	0.300106	268.499	282.392	161.788	297.157	296.845	170.588	231.495	194.262	274.493	180.153
507252	OLFM2	olfactomedin 2	411.019	-0.323593	0.799077	0.225588	-1.43445	0.151445	0.300126	464.546	466.024	408.172	654.586	292.979	299.821	365.519	463.638	390.998	303.903
509009	SLC35E3	solute carrier family 35 member E3	244.373	-0.216521	0.860638	0.150954	-1.43435	0.151472	0.300126	277.023	268.504	248.499	290.149	231.137	194.957	257.894	203.759	226.832	244.975
524077	MYOM2	myomesin 2	33.4975	0.444495	1.36084	0.310235	1.43277	0.151924	0.300846	11.365	29.3194	26.436	35.0421	38.6516	38.4007	39.2594	44.0326	37.9524	34.5154
613784	SLC35B4	solute carrier family 35 member B4	32.2322	0.566215	1.48063	0.39536	1.43215	0.152101	0.301022	19.8888	9.25876	28.5509	19.6236	50.2471	37.6622	29.1061	36.2622	53.8394	37.8827
508819	PIP5K1C	phosphatidylinositol-4-phosphate 5-kinase type 1 gamma	40.2115	0.596974	1.51254	0.417012	1.43155	0.152272	0.301186	41.1983	12.345	12.6893	32.2387	60.2966	36.1853	54.8278	54.3932	60.9003	37.0409
514572	ANAPC4	anaphase promoting complex subunit 4	74.0798	-0.554436	0.680923	0.388009	-1.42893	0.153026	0.302501	80.9759	148.14	68.7336	60.2724	82.7145	53.1702	27.0755	34.5354	72.3743	112.806
540575	PTPRG	protein tyrosine phosphatase, receptor type G	27.5153	0.649854	1.56901	0.455229	1.42753	0.153426	0.303117	15.6269	4.62938	27.4935	18.2219	39.4247	28.8005	39.9363	23.3114	23.8306	53.8776
781199	MAP10	microtubule associated protein 10	86.7642	-0.356037	0.781308	0.249557	-1.42668	0.153673	0.303429	122.174	89.5013	104.687	92.5111	78.8493	70.8936	80.5495	46.6228	73.2569	108.597
530352	SLC39A1	solute carrier family 39 member 1	275.552	-0.353699	0.782575	0.248407	-1.42387	0.154485	0.304855	326.745	351.833	354.243	333.601	180.89	365.545	178.698	221.026	221.536	221.403
515950	HDC	histidine decarboxylase	24.7583	-0.496339	0.708903	0.348863	-1.42274	0.154813	0.305325	21.3095	40.1213	35.953	28.0337	20.0989	28.062	18.9528	24.1748	12.3566	18.5204
540111	NUP160	nucleoporin 160	86.1476	0.786116	1.72443	0.552924	1.42175	0.1551	0.305715	29.8332	12.345	43.3551	105.126	124.458	144.741	92.0566	33.672	213.592	62.296
525894	RARS2	arginyl-tRNA synthetase 2, mitochondrial	38.1727	0.843203	1.79403	0.593622	1.42044	0.15548	0.306287	15.6269	1.54313	12.6893	46.2556	59.5235	71.6321	48.7358	25.0382	29.1262	71.5562
100126170	PHRF1	PHD and ring finger domains 1	24.389	-0.545263	0.685266	0.384306	-1.41883	0.15595	0.306908	28.4126	23.1469	53.9295	18.2219	20.8719	28.062	20.3066	19.8578	16.7697	14.3112
506860	PTS	6-pyruvoyltetrahydropterin synthase	27.1673	0.567094	1.48154	0.399717	1.41874	0.155975	0.306908	12.7857	37.035	25.3786	15.4185	19.3258	24.3697	50.0896	16.4043	39.7176	31.148
537304	OSBPL3	oxysterol binding protein like 3	297.635	-0.286006	0.82017	0.20174	-1.41769	0.156281	0.306977	335.269	371.893	325.692	327.994	275.973	311.636	314.752	283.19	268.315	161.633
287026	PLCB1	phospholipase C beta 1	123.813	-0.294828	0.81517	0.207912	-1.41804	0.156179	0.306977	149.166	157.399	120.548	141.57	115.182	131.449	111.686	79.4314	95.3223	136.378
510160	TTC30A	tetratricopeptide repeat domain 30A	25.2256	0.651857	1.57119	0.459727	1.41792	0.156213	0.306977	12.7857	6.17251	16.919	15.4185	44.8359	33.9698	37.2288	30.2185	36.1872	18.5204
615585	BARHL1	BarH like homeobox 1	37.777	-0.552224	0.681968	0.389824	-1.4166	0.1566	0.307388	53.984	43.2075	47.5848	53.264	27.0561	48.0009	19.6297	41.4425	32.6567	10.9439
513504	MCCC1	methylcrotonoyl-CoA carboxylase 1	50.7377	0.347991	1.27279	0.245694	1.41636	0.15667	0.307388	39.7776	47.8369	54.9869	46.2556	34.7865	47.2624	57.5354	50.0763	74.1395	54.7195
508251	FAT1	FAT atypical cadherin 1	240.322	-0.242513	0.845271	0.171301	-1.41572	0.156858	0.307458	318.221	293.194	225.235	210.253	256.647	197.173	253.156	219.3	233.893	196.148
515653	SGSM1	small G protein signaling modulator 1	63.212	0.365197	1.28806	0.257977	1.41562	0.156887	0.307458	48.3014	33.9488	65.5613	50.4606	75.7572	61.2934	90.7028	62.1637	72.3743	71.5562
510474	SRSF5	serine and arginine rich splicing factor 5	26.1337	0.59826	1.51389	0.422822	1.41492	0.157091	0.307682	17.0476	15.4313	14.8042	12.6152	42.5168	34.7083	41.967	37.1255	29.1262	15.9949
532512	POR	cytochrome p450 oxidoreductase	174.231	-0.386409	0.765031	0.27329	-1.41392	0.157386	0.307905	211.674	254.616	224.177	201.842	96.6291	220.804	136.054	118.284	136.805	141.429
540401	PYGO2	pygopus family PHD finger 2	163.015	-0.422931	0.745908	0.299111	-1.41396	0.157374	0.307905	174.738	192.891	278.107	178.014	110.544	239.266	101.533	126.918	109.444	118.699
338082	ATP6V1B2	ATPase H+ transporting V1 subunit B2	29.1526	0.480329	1.39506	0.339886	1.41321	0.157594	0.308136	28.4126	13.8881	20.0914	32.2387	27.0561	48.0009	37.2288	37.1255	25.5958	21.8878
537649	LACC1	laccase domain containing 1	165.375	-0.306949	0.808349	0.217664	-1.41019	0.158482	0.309695	176.158	233.012	140.64	218.663	147.649	124.802	133.347	156.273	126.214	196.99
541268	DAB2IP	DAB2 interacting protein	79.2633	0.436692	1.3535	0.309847	1.40938	0.158724	0.309989	55.4046	44.7507	113.146	37.8455	83.4875	64.9858	105.594	84.6117	107.679	95.1277
788224	TYRO3	TYRO3 protein tyrosine kinase	39.8692	-0.417846	0.748541	0.296701	-1.40831	0.15904	0.310251	58.2458	60.1819	47.5848	37.8455	25.5101	29.539	36.5519	37.9889	27.361	37.8827
613652	UBAC1	UBA domain containing 1	34.0954	-0.566226	0.675381	0.402021	-1.40845	0.158998	0.310251	42.6189	47.8369	67.6762	21.0253	24.737	29.539	37.2288	12.9508	20.3001	37.0409
522908	ERCC6	ERCC excision repair 6, chromatin remodeling factor	906.613	-0.252223	0.839602	0.179485	-1.40525	0.159946	0.311839	1007.23	1229.87	762.415	1082.1	848.79	680.874	824.448	729.56	892.322	1008.52
281785	GLUD1	glutamate dehydrogenase 1	31.3185	-0.528229	0.693406	0.376089	-1.40453	0.160161	0.311903	32.6745	20.0606	39.1253	63.0758	30.1483	42.0931	16.9222	18.9945	27.361	22.7296
532553	GRIK3	glutamate ionotropic receptor kainate type subunit 3	69.611	0.564984	1.47937	0.402191	1.40476	0.160091	0.311903	53.984	21.6038	65.5613	54.6657	83.4875	25.1081	103.564	113.967	89.144	85.0256
529902	DSG3	desmoglein 3	57.2817	0.547985	1.46204	0.390253	1.40418	0.160265	0.311927	51.1427	24.69	47.5848	26.632	81.1684	50.9548	125.224	42.3058	59.1351	63.9797
539160	CAPZA3	capping actin protein of muscle Z-line subunit alpha 3	48.245	0.836256	1.78541	0.596289	1.40243	0.160785	0.312705	24.1507	1.54313	20.0914	25.2303	100.494	93.0478	68.3656	37.1255	45.8959	66.5052
615644	PUS7	pseudouridine synthase 7	26.7104	0.578694	1.4935	0.412698	1.40222	0.160849	0.312705	21.3095	7.71563	25.3786	19.6236	31.6943	28.8005	27.7524	53.5298	35.3045	15.9949
512490	STXBP3	syntaxin binding protein 3	415.125	-0.28109	0.822969	0.200556	-1.40155	0.161048	0.312915	511.427	546.267	327.807	412.095	480.053	273.236	385.825	375.572	484.555	354.414
353106	PPARD	peroxisome proliferator activated receptor delta	106.576	-0.365217	0.776352	0.260926	-1.39969	0.161605	0.313818	127.857	120.364	162.846	91.1095	98.1752	133.664	98.1486	88.9286	88.2614	56.4031
527449	MAN2A2	mannosidase alpha class 2A member 2	575.641	-0.279524	0.823863	0.199994	-1.39766	0.162215	0.314286	738.728	728.356	602.741	615.339	473.096	655.027	462.991	398.02	444.837	637.271
506764	RNF34	ring finger protein 34	266.909	0.197084	1.14638	0.140992	1.39784	0.162161	0.314286	281.285	233.012	230.522	281.738	218.768	271.759	268.724	287.507	304.502	291.276
517909	SGK2	SGK2, serine/threonine kinase 2	88.3181	-0.327737	0.796785	0.234471	-1.39777	0.162181	0.314286	115.071	118.821	107.859	84.101	67.2539	87.14	77.842	80.2948	54.722	90.0766
514466	ZDHHC19	zinc finger DHHC-type containing 19	34.1133	0.469657	1.38478	0.335863	1.39836	0.162005	0.314286	32.6745	33.9488	12.6893	22.4269	40.9707	30.2775	45.3514	38.8523	49.4264	34.5154
613714	ADTRP	androgen dependent TFPI regulating protein	35.3315	0.423003	1.34072	0.30301	1.396	0.162713	0.314919	31.2539	29.3194	27.4935	28.0337	34.7865	59.8165	41.2901	35.3988	23.8306	42.0919
NA	C21H15orf27	NA	29.9309	0.591763	1.50709	0.424407	1.39433	0.163219	0.314919	17.0476	13.8881	13.7467	25.2303	47.928	21.4158	47.3821	37.9889	49.4264	25.2551
540247	CMTM4	CKLF like MARVEL transmembrane domain containing 4	40.4345	0.4267	1.34416	0.305855	1.39511	0.162984	0.314919	36.9364	20.0606	44.4125	25.2303	44.0629	32.4929	46.7052	63.8905	46.7785	43.7756
281766	FCGR3A	Fc fragment of IgG, low affinity IIIa, receptor (CD16a)	25.9381	0.590332	1.50559	0.423277	1.39467	0.163115	0.314919	11.365	6.17251	31.7232	21.0253	31.6943	22.1542	47.3821	29.3551	27.361	31.148
512403	LRRC36	leucine rich repeat containing 36	33.5738	0.542346	1.45634	0.389087	1.3939	0.163349	0.314919	15.6269	10.8019	24.3211	42.0505	42.5168	25.8466	41.2901	50.0763	33.5393	49.6684
540278	MRPL35	mitochondrial ribosomal protein L35	69.0298	-0.50348	0.705403	0.36129	-1.39356	0.163449	0.314919	76.714	112.648	86.7101	85.5027	44.0629	73.109	40.6132	31.0818	38.835	101.021
281923	MTIF2	mitochondrial translational initiation factor 2	26.3767	0.533217	1.44715	0.382106	1.39547	0.162875	0.314919	14.2063	24.69	14.8042	21.0253	32.4674	17.7234	46.7052	22.448	32.6567	37.0409
534576	PABPC4	poly(A) binding protein cytoplasmic 4	1341.59	1.91878	3.78103	1.37694	1.39351	0.163466	0.314919	58.2458	123.45	20.0914	67.2808	2536.32	99.6941	3320.81	4299.66	2796.12	94.2858
515509	SUGT1	SGT1 homolog, MIS12 kinetochore complex assembly cochaperone	596.201	0.320428	1.2487	0.229788	1.39445	0.163182	0.314919	501.482	530.835	464.216	542.452	611.469	329.36	691.778	782.226	738.748	769.44
783432	TNFRSF25	TNF receptor superfamily member 25	31.0965	0.427862	1.34524	0.306613	1.39545	0.162881	0.314919	29.8332	10.8019	35.953	28.0337	27.0561	41.3546	35.1981	35.3988	36.1872	31.148
509431	ASB14	ankyrin repeat and SOCS box containing 14	25.2354	0.524045	1.43798	0.376809	1.39074	0.164303	0.316353	21.3095	24.69	14.8042	15.4185	27.0561	32.4929	31.1368	48.3495	19.4175	17.6786
616443	OPALIN	oligodendrocytic myelin paranodal and inner loop protein	33.8487	0.484453	1.39906	0.348535	1.38997	0.164538	0.316626	15.6269	30.8625	34.8955	43.4522	17.0067	38.4007	44.6745	33.672	52.9568	26.9388
281987	PLCG1	phospholipase C gamma 1	93.4341	0.3986	1.31823	0.286877	1.38944	0.164698	0.316756	90.9203	38.5782	82.4804	77.0926	112.09	66.4627	127.255	99.2892	114.74	125.434
534551	HSPB6	heat shock protein family B (small) member 6	29.2929	0.636923	1.55501	0.458792	1.38826	0.165058	0.317268	28.4126	12.345	9.51696	50.4606	14.6876	34.7083	23.691	58.7102	31.7741	28.6225
539850	HNRNPH3	heterogeneous nuclear ribonucleoprotein H3	103.504	-0.312309	0.805352	0.225094	-1.38746	0.165302	0.317379	143.484	117.278	121.606	124.75	68.0269	88.617	92.0566	79.4314	97.0875	102.704
527428	RABGAP1L	RAB GTPase activating protein 1-like	29.05	0.546261	1.4603	0.393684	1.38756	0.165271	0.317379	11.365	20.0606	24.3211	22.4269	38.6516	22.8927	55.5047	33.672	39.7176	21.8878
540101	RABGAP1L	RAB GTPase activating protein 1 like	29.05	0.546261	1.4603	0.393684	1.38756	0.165271	0.317379	11.365	20.0606	24.3211	22.4269	38.6516	22.8927	55.5047	33.672	39.7176	21.8878
514193	FILIP1	filamin A interacting protein 1	31.6371	-0.552317	0.681924	0.398207	-1.38701	0.165438	0.317463	38.357	30.8625	54.9869	50.4606	13.9146	35.4468	19.6297	31.0818	26.4784	15.1531
281486	SELP	selectin P	56.7416	0.367131	1.28979	0.264783	1.38653	0.165584	0.317501	48.3014	27.7763	49.6997	47.6573	71.892	51.6932	61.5967	74.2511	69.7265	64.8215
615905	ZNF34	zinc finger protein 34	125.608	-0.297978	0.813392	0.214939	-1.38633	0.165645	0.317501	156.269	154.313	161.788	113.536	107.452	131.449	93.4104	136.415	114.74	86.7093
512099	TBC1D16	TBC1 domain family member 16	215.118	-0.358892	0.779763	0.259262	-1.38428	0.166272	0.318524	237.245	337.945	267.532	211.654	156.153	200.127	243.002	148.502	120.035	228.98
788251	PLEKHO1	pleckstrin homology domain containing O1	365.902	-0.390021	0.763119	0.281841	-1.38383	0.16641	0.318567	478.752	598.733	277.049	370.045	351.73	170.588	324.229	278.873	328.332	480.689
781117	SLC46A3	solute carrier family 46 member 3	146.488	0.231216	1.17382	0.167112	1.3836	0.166481	0.318567	126.436	148.14	117.376	156.989	126.004	138.095	146.884	166.633	180.053	158.266
281751	EIF4E	eukaryotic translation initiation factor 4E	32.6193	0.584367	1.49938	0.423113	1.38111	0.167244	0.319488	17.0476	9.25876	25.3786	26.632	50.2471	28.062	36.5519	66.4806	37.0698	29.4643
523783	SLC35E4	solute carrier family 35 member E4	23.4128	-0.556908	0.679757	0.403191	-1.38125	0.167201	0.319488	34.0951	43.2075	24.3211	22.4269	16.2337	21.4158	17.5991	25.0382	7.06091	22.7296
529395	USP3	ubiquitin specific peptidase 3	354.181	0.238847	1.18005	0.172887	1.38152	0.167119	0.319488	295.491	311.712	299.256	326.592	389.609	289.482	387.179	347.944	448.368	446.174
504256	CLGN	calmegin	218.103	-0.385383	0.765576	0.279214	-1.38024	0.167512	0.319704	274.182	311.712	271.762	238.286	140.692	204.558	173.96	103.606	184.466	277.806
281861	IL2RA	interleukin 2 receptor subunit alpha	46.0656	0.451391	1.36736	0.327063	1.38014	0.167545	0.319704	48.3014	23.1469	29.6083	29.4354	62.6157	64.2473	51.4434	44.0326	37.9524	69.8725
540413	SLC35C1	solute carrier family 35 member C1	60.8716	-0.389769	0.763252	0.282932	-1.37761	0.168325	0.321014	68.1903	63.2682	100.457	49.0589	64.1617	79.7553	56.1816	40.5791	44.1307	42.9337
504307	NUP188	nucleoporin 188	1230.07	-0.182987	0.880878	0.132894	-1.37694	0.168531	0.321226	1338.23	1402.7	1142.04	1473.17	1185.83	1039.03	1123.63	1054.19	1265.67	1276.23
540688	PBX1	PBX homeobox 1	30.6268	-0.551246	0.682431	0.401339	-1.37352	0.169592	0.323069	25.5713	67.8976	29.6083	39.2471	20.8719	21.4158	35.1981	34.5354	16.7697	15.1531
617324	CIB4	calcium and integrin binding family member 4	32.8315	0.469746	1.38487	0.342262	1.37248	0.169916	0.323504	36.9364	26.2331	23.2637	22.4269	28.6022	22.8927	27.0755	52.6665	32.6567	55.5613
281499	SPP1	secreted phosphoprotein 1	45.5957	0.383596	1.30459	0.279652	1.37169	0.170161	0.32379	36.9364	37.035	40.1827	23.8286	57.9775	44.3085	57.5354	44.896	64.4308	48.8266
504474	STT3B	STT3B, catalytic subunit of the oligosaccharyltransferase complex	54.4042	-0.544902	0.685438	0.39741	-1.37113	0.170333	0.323938	99.4441	87.9582	61.3315	54.6657	20.8719	54.6471	62.9505	27.6283	28.2436	46.3011
535768	MTO1	mitochondrial tRNA translation optimization 1	104.605	-0.403925	0.755799	0.294817	-1.37009	0.17066	0.324377	147.746	154.313	142.754	81.2977	70.346	79.7553	66.3349	70.7975	98.8527	133.852
540386	DDAH2	dimethylarginine dimethylaminohydrolase 2	44.8677	0.528718	1.44265	0.386246	1.36886	0.171042	0.324922	19.8888	15.4313	51.8146	39.2471	55.6584	43.57	79.1957	50.9397	61.7829	31.148
785086	CREB3L2	cAMP responsive element binding protein 3 like 2	46.5066	-0.328712	0.796247	0.240255	-1.36818	0.171256	0.324966	55.4046	61.7251	50.7571	47.6573	44.0629	47.2624	33.1674	50.0763	37.0698	37.8827
493989	XYLT2	xylosyltransferase 2	40.5015	-0.377741	0.769642	0.276052	-1.36837	0.171196	0.324966	55.4046	38.5782	59.2167	42.0505	34.0134	33.9698	39.2594	44.896	26.4784	31.148
511170	KIF18B	kinesin family member 18B	304.699	0.346925	1.27185	0.253746	1.36721	0.171559	0.325361	258.555	180.546	190.339	285.944	423.622	264.374	404.778	291.824	334.511	412.501
281909	MANBA	mannosidase beta	132.282	-0.355512	0.781592	0.260117	-1.36674	0.171707	0.325461	214.515	165.115	96.2271	166.8	102.04	129.233	139.439	93.2455	124.449	91.7603
508829	ABCG8	ATP binding cassette subfamily G member 8	26.757	0.509495	1.42355	0.373001	1.36593	0.17196	0.325759	9.94441	10.8019	29.6083	26.632	31.6943	33.2314	23.0141	28.4917	37.9524	36.199
281275	LDHB	lactate dehydrogenase B	32.2219	0.526197	1.44013	0.385363	1.36546	0.172108	0.325771	14.2063	12.345	28.5509	29.4354	45.6089	26.5851	41.2901	27.6283	49.4264	47.1429
505537	RRM1	ribonucleotide reductase catalytic subunit M1	182.175	0.208766	1.1557	0.152908	1.3653	0.172158	0.325771	159.111	154.313	182.937	197.637	151.514	206.773	180.052	182.174	195.94	211.301
531489	WDR34	WD repeat domain 34	135.976	-0.352983	0.782964	0.258635	-1.36479	0.172318	0.325894	157.69	220.667	132.18	145.775	108.225	122.587	136.054	74.2511	102.383	159.949
528099	RAB32	RAB32, member RAS oncogene family	27.0897	0.543991	1.458	0.398718	1.36435	0.172458	0.325976	12.7857	21.6038	12.6893	16.8202	44.8359	36.9237	39.9363	32.8086	24.7132	27.7806
536654	GNAQ	G protein subunit alpha q	29.6441	0.710924	1.63685	0.521501	1.36323	0.172811	0.326313	49.7221	10.8019	11.6318	9.81179	30.1483	16.9849	29.783	21.5846	50.309	65.6634
509885	IARS	isoleucyl-tRNA synthetase	77.9441	0.370385	1.2927	0.271768	1.36287	0.172923	0.326313	61.0871	58.6388	67.6762	75.6909	76.5302	138.833	77.1651	96.6991	54.722	72.3981
281251	IL1B	interleukin 1 beta	68.8273	-0.284672	0.820928	0.20884	-1.36311	0.172847	0.326313	78.1347	95.6738	79.308	57.469	68.0269	59.8165	60.2429	55.2566	65.3134	69.0307
618567	TMEM52B	transmembrane protein 52B	31.3291	0.563612	1.47796	0.41397	1.36148	0.173362	0.326961	24.1507	6.17251	27.4935	19.6236	47.155	29.539	52.1203	44.0326	33.5393	29.4643
618367	LOC618367	uncharacterized LOC618367	30.677	0.445206	1.36151	0.327169	1.36079	0.173582	0.327194	19.8888	29.3194	33.8381	18.2219	27.8292	22.1542	33.8443	29.3551	48.5437	43.7756
513545	CLCN7	chloride voltage-gated channel 7	36.388	-0.467331	0.723301	0.343943	-1.35875	0.174227	0.328047	49.7221	44.7507	35.953	50.4606	30.9213	32.4929	23.0141	23.3114	18.5349	54.7195
338048	CYP11A1	cytochrome P450, family 11, subfamily A, polypeptide 1	289.024	-1.18692	0.439239	0.873511	-1.35879	0.174212	0.328047	463.125	606.449	82.4804	675.612	180.89	634.35	58.2123	84.6117	57.3699	47.1429
539966	ZBTB24	zinc finger and BTB domain containing 24	99.1863	0.343184	1.26855	0.252842	1.35731	0.174683	0.328725	79.5553	112.648	58.1592	89.7078	97.4021	70.8936	104.917	132.961	105.031	140.587
508699	LRRC57	leucine rich repeat containing 57	101.411	-0.243097	0.844929	0.179336	-1.35554	0.175246	0.329602	119.333	128.079	89.8824	106.528	106.679	85.6631	84.6108	103.606	97.9701	91.7603
518569	BPIFB6	BPI fold containing family B member 6	83.1556	-0.360656	0.778811	0.266315	-1.35424	0.175659	0.330196	119.333	101.846	96.2271	74.2892	76.5302	50.2163	96.1179	50.0763	96.2049	70.7144
789857	ZNF286A	zinc finger protein 286A	45.6144	-0.429048	0.742752	0.316925	-1.35378	0.175806	0.33029	51.1427	47.8369	61.3315	68.6825	33.2404	50.9548	23.691	34.5354	30.0089	54.7195
515034	IRAK2	interleukin 1 receptor associated kinase 2	119.427	-0.244956	0.843842	0.180998	-1.35336	0.175941	0.330362	116.492	134.252	113.146	166.8	118.274	111.51	111.686	117.42	112.092	92.6022
508245	RNASET2	ribonuclease T2	55.8321	0.504478	1.41861	0.372899	1.35285	0.176102	0.330483	29.8332	24.69	42.2976	40.6488	91.2179	50.9548	94.7641	42.3058	76.7874	64.8215
507783	PTH1R	parathyroid hormone 1 receptor	66.3772	-0.461845	0.726057	0.341545	-1.35222	0.176304	0.330497	72.4521	87.9582	99.3994	54.6657	70.346	110.033	44.6745	31.0818	48.5437	44.6174
505797	TMEM30A	transmembrane protein 30A	132.187	-0.268427	0.830224	0.198499	-1.35229	0.176284	0.330497	160.531	165.115	125.835	110.733	160.018	103.386	136.731	101.879	146.514	111.123
540722	ADAMTS6	ADAM metallopeptidase with thrombospondin type 1 motif 6	95.3083	0.428274	1.34562	0.316819	1.35179	0.176441	0.330573	58.2458	52.4663	60.2741	74.2892	158.472	87.14	141.469	105.333	106.796	108.597
511366	SNAPC3	small nuclear RNA activating complex polypeptide 3	35.8721	0.540646	1.45462	0.400521	1.34986	0.177062	0.331553	24.1507	24.69	15.8616	19.6236	60.2966	29.539	65.658	42.3058	36.1872	40.4082
534496	MYCBP2	MYC binding protein 2, E3 ubiquitin protein ligase	955.702	0.22863	1.17172	0.169449	1.34925	0.177257	0.331553	823.966	729.899	877.676	846.617	1119.35	997.68	980.132	851.297	1024.71	1305.69
510050	TGIF1	TGFB induced factor homeobox 1	38.4583	0.465442	1.38074	0.344961	1.34926	0.177254	0.331553	25.5713	21.6038	44.4125	37.8455	31.6943	56.8626	54.8278	51.8031	40.6002	19.3623
782746	PURA	purine rich element binding protein A	24.1975	0.566769	1.4812	0.420233	1.3487	0.177432	0.3317	17.0476	12.345	16.919	33.6404	17.7798	43.57	20.3066	23.3114	14.1218	42.9337
529312	SSR1	signal sequence receptor subunit 1	68.6451	0.391039	1.31134	0.290129	1.34781	0.177718	0.332052	51.1427	40.1213	87.7676	65.8791	51.0202	59.078	55.5047	83.7483	114.74	77.4491
540607	RNF121	ring finger protein 121	24.46	0.54574	1.45977	0.405064	1.34729	0.177886	0.332184	14.2063	12.345	24.3211	15.4185	31.6943	26.5851	36.5519	23.3114	45.0133	15.1531
654488	OAS1Y	2',5'-oligoadenylate synthetase 1, 40/46kDa	138.116	-0.35264	0.78315	0.261932	-1.3463	0.178205	0.332528	203.15	205.236	108.916	162.595	96.6291	104.125	114.394	100.153	121.801	164.158
511821	ZCCHC7	zinc finger CCHC-type containing 7	41.9885	-0.453705	0.730165	0.337048	-1.34611	0.178266	0.332528	58.2458	50.9232	46.5274	58.8707	29.3752	51.6932	40.6132	15.5409	34.4219	33.6735
514062	EHMT2	euchromatic histone lysine methyltransferase 2	480.075	-0.369744	0.77392	0.274871	-1.34515	0.178576	0.332925	536.998	419.73	958.041	428.915	362.552	505.117	478.559	319.452	329.215	462.169
539882	TUBA1B	tubulin, alpha 1b	49.4219	0.385462	1.30628	0.286977	1.34318	0.179213	0.333929	51.1427	37.035	61.3315	35.0421	30.1483	50.9548	73.7807	43.1692	65.3134	46.3011
100138267	SENP3	SUMO specific peptidase 3	144.722	-0.296184	0.814404	0.220652	-1.34231	0.179495	0.334273	173.317	166.658	140.64	199.039	119.047	110.033	101.533	113.967	157.988	165
515158	SPDL1	spindle apparatus coiled-coil protein 1	28.8233	-0.372274	0.772564	0.278112	-1.33858	0.180708	0.336349	38.357	37.035	30.6658	26.632	30.1483	25.8466	20.3066	29.3551	22.948	26.9388
520521	DLGAP4	DLG associated protein 4	27.9206	0.469649	1.38477	0.351222	1.33718	0.181162	0.33701	22.7301	10.8019	35.953	25.2303	21.6449	20.6773	41.967	30.2185	38.835	31.148
281047	CCT8	chaperonin containing TCP1 subunit 8	82.5258	-0.337687	0.791309	0.253087	-1.33427	0.182115	0.338044	98.0235	81.7857	82.4804	107.93	90.4448	90.0939	48.7358	48.3495	86.4961	90.9185
505958	DGAT2L6	diacylglycerol O-acyltransferase 2 like 6	137.594	-0.267251	0.830901	0.200343	-1.33397	0.182215	0.338044	180.42	160.485	141.697	116.34	152.287	87.8785	121.163	145.049	135.922	134.694
536625	EVI5L	ecotropic viral integration site 5 like	23.5069	-0.487671	0.713176	0.365515	-1.3342	0.182137	0.338044	28.4126	16.9744	33.8381	26.632	30.9213	28.8005	17.5991	25.9015	15.887	10.1021
506526	ITGA10	integrin subunit alpha 10	173.225	0.262707	1.19973	0.196922	1.33407	0.182182	0.338044	154.849	135.795	121.606	152.784	220.314	171.326	213.896	194.262	172.11	195.306
522159	PLD2	phospholipase D2	41.6264	-0.331808	0.79454	0.248575	-1.33484	0.181928	0.338044	41.1983	52.4663	48.6423	50.4606	40.1977	42.8315	44.6745	33.672	32.6567	29.4643
614629	BOLA3	bolA family member 3	97.448	-0.298542	0.813073	0.223897	-1.33339	0.182402	0.338144	107.968	134.252	95.1696	92.5111	107.452	62.0319	75.1344	101.879	114.74	83.3419
616638	CHTOP	chromatin target of PRMT1	98.7308	0.30512	1.23552	0.228896	1.33301	0.182529	0.338144	63.9284	74.0701	91.9973	95.3145	114.409	91.5709	126.578	82.8849	125.331	121.225
506246	FGFR1OP	FGFR1 oncogene partner	287.417	0.292152	1.22447	0.219186	1.3329	0.182566	0.338144	217.356	243.814	181.88	270.525	376.467	251.081	341.828	322.906	380.406	287.909
503575	ARHGEF12	Rho guanine nucleotide exchange factor 12	74.0459	0.304906	1.23534	0.229026	1.33132	0.183084	0.338736	49.7221	49.38	77.1932	72.8876	80.3954	76.0629	102.21	83.7483	69.7265	79.1328
790875	GSK3B	glycogen synthase kinase 3 beta	467.153	-0.305684	0.809059	0.22957	-1.33155	0.183008	0.338736	535.578	728.356	394.425	585.904	340.134	403.207	339.12	445.506	533.099	366.199
508460	DXO	decapping exoribonuclease	136.441	-0.29493	0.815112	0.22192	-1.32899	0.183851	0.339969	156.269	140.424	173.42	166.8	115.182	158.034	78.5189	128.644	119.153	127.959
510922	RSPH10B	radial spoke head 10 homolog B (Chlamydomonas)	5965.14	-0.445561	0.734299	0.335472	-1.32816	0.184125	0.340291	12261.5	5728.08	5079.94	8878.27	2448.97	5082.92	5202.55	4157.2	4252.43	6559.6
512479	HNRNPR	heterogeneous nuclear ribonucleoprotein R	217.733	0.311519	1.24101	0.234798	1.32675	0.184591	0.340415	170.476	237.641	164.961	197.637	200.989	174.28	225.403	377.299	240.071	188.572
282271	PLA2G15	phospholipase A2 group XV	23.7798	0.478711	1.3935	0.360773	1.3269	0.184541	0.340415	17.0476	9.25876	15.8616	29.4354	27.0561	28.8005	34.5212	31.9452	20.3001	23.5715
282393	UQCRC1	ubiquinol-cytochrome c reductase core protein 1	57.5817	0.501816	1.41599	0.378138	1.32707	0.184486	0.340415	14.2063	40.1213	58.1592	42.0505	81.9415	49.4778	89.349	50.0763	85.6135	64.8215
514192	YEATS2	YEATS domain containing 2	46.7354	0.382347	1.30346	0.288045	1.32739	0.184381	0.340415	28.4126	43.2075	34.8955	42.0505	53.3393	31.0159	58.8891	57.8468	51.1916	66.5052
512486	LOC512486	interferon-induced guanylate-binding protein 1	147.499	-0.320369	0.800865	0.241691	-1.32553	0.184994	0.340973	211.674	182.089	97.2845	158.39	170.067	92.3094	123.87	126.054	165.931	147.322
533979	MPRIP	myosin phosphatase Rho interacting protein	911.631	-0.379112	0.768911	0.286682	-1.32241	0.186031	0.3427	1052.69	981.428	1536.46	969.965	613.788	1371.35	670.118	559.473	706.091	654.95
338446	PPARGC1A	PPARG coactivator 1 alpha	105.413	0.496169	1.41046	0.375475	1.32144	0.186353	0.343107	34.0951	55.5525	62.389	109.331	173.932	154.341	100.856	97.5625	110.327	155.74
508530	PSMC3IP	PSMC3 interacting protein	52.6368	-0.410479	0.752373	0.310846	-1.32052	0.18666	0.343342	62.5077	95.6738	65.5613	39.2471	38.6516	53.1702	52.1203	45.7594	45.8959	27.7806
282069	SFRP5	secreted frizzled related protein 5	228.127	0.355011	1.279	0.268855	1.32046	0.186682	0.343342	203.15	216.038	107.859	200.441	272.881	155.08	266.693	237.431	337.158	284.541
100313171	MIR2368	microRNA 2368	30.5817	-0.449668	0.732211	0.340738	-1.31969	0.186939	0.343477	46.8808	35.4919	40.1827	29.4354	25.5101	38.4007	33.1674	18.1311	15.887	22.7296
514586	QARS	glutaminyl-tRNA synthetase	139.554	-0.309877	0.80671	0.23482	-1.31963	0.186957	0.343477	176.158	160.485	163.903	166.8	106.679	175.757	113.717	88.0652	105.914	138.061
286855	MTFMT	mitochondrial methionyl-tRNA formyltransferase	84.9466	0.311393	1.24091	0.236312	1.31772	0.187597	0.344467	68.1903	78.6994	56.0443	72.8876	102.04	112.987	70.3962	96.6991	82.0831	109.439
280762	DDC	dopa decarboxylase	250.129	-0.308255	0.807618	0.234051	-1.31704	0.187825	0.344518	346.634	191.348	365.874	248.098	231.91	288.744	238.941	154.546	218.006	217.194
784181	LDLRAD1	low density lipoprotein receptor class A domain containing 1	25.9127	0.45782	1.37347	0.347614	1.31704	0.187827	0.344518	18.4682	23.1469	12.6893	22.4269	31.6943	20.6773	29.1061	43.1692	29.1262	28.6225
511081	COMMD2	COMM domain containing 2	698.462	-0.245734	0.843386	0.186727	-1.31601	0.18817	0.344777	872.267	969.083	615.43	651.783	681.815	472.624	617.321	679.484	701.678	723.139
782388	CPNE2	copine 2	26.3637	-0.68426	0.622325	0.519929	-1.31607	0.188152	0.344777	28.4126	41.6644	46.5274	23.8286	22.418	55.3856	10.8302	14.6775	11.474	8.41838
781106	NEGR1	neuronal growth regulator 1	25.3877	-0.544837	0.685469	0.414451	-1.3146	0.188645	0.34546	21.3095	37.035	24.3211	42.0505	26.2831	31.7544	14.8915	32.8086	15.0044	8.41838
513317	TMEM175	transmembrane protein 175	38.7044	0.35731	1.28104	0.271959	1.31384	0.1889	0.345741	26.992	27.7763	34.8955	35.0421	43.2898	36.9237	35.1981	46.6228	57.3699	42.9337
510575	ITM2B	integral membrane protein 2B	141.434	0.278916	1.21328	0.212631	1.31174	0.189608	0.346666	115.071	148.14	79.308	133.16	163.11	144.741	166.514	139.868	152.692	171.735
507100	SPI1	Spi-1 proto-oncogene	111.275	0.421114	1.33896	0.320973	1.31199	0.189523	0.346666	71.0315	61.7251	86.7101	67.2808	186.301	137.356	159.745	143.322	104.148	95.1277
NA	HMP19	NA	69.016	0.328968	1.25611	0.251261	1.30927	0.190444	0.348008	39.7776	54.0094	64.5039	79.896	67.2539	102.648	79.8726	68.2074	75.9048	58.0868
404167	GCNT3	glucosaminyl (N-acetyl) transferase 3, mucin type	240.614	0.346703	1.27165	0.265347	1.3066	0.191347	0.349283	210.253	253.073	115.261	220.064	260.512	152.126	275.493	296.141	333.628	289.592
509019	ZBTB7B	zinc finger and BTB domain containing 7B	155.79	-0.279204	0.824045	0.213666	-1.30673	0.191303	0.349283	181.841	219.124	183.995	148.578	122.139	179.449	115.071	137.278	150.044	120.383
532995	KIAA0391	KIAA0391	74.0507	0.41835	1.3364	0.320405	1.30569	0.191658	0.349475	44.0395	100.303	32.7807	49.0589	90.4448	58.3395	84.6108	96.6991	88.2614	95.9695
513538	NPTX1	neuronal pentraxin 1	107.916	-0.419366	0.747753	0.321158	-1.30579	0.191623	0.349475	130.698	140.424	214.66	63.0758	68.7999	76.8014	108.302	86.3385	105.031	85.0256
534101	BMPER	BMP binding endothelial regulator	26.5678	0.460168	1.3757	0.352516	1.30538	0.191763	0.349481	17.0476	21.6038	25.3786	16.8202	30.1483	22.8927	48.7358	24.1748	35.3045	23.5715
527903	VSTM2L	V-set and transmembrane domain containing 2 like	65.8846	-0.360854	0.778703	0.276527	-1.30495	0.191909	0.34956	93.7616	77.1563	62.389	82.6994	55.6584	50.9548	66.3349	35.3988	50.309	84.1838
524030	GJB5	gap junction protein beta 5	35.1737	0.415852	1.33409	0.318845	1.30425	0.192149	0.34981	21.3095	41.6644	23.2637	19.6236	44.0629	32.4929	48.059	40.5791	33.5393	47.1429
539108	CCR10	C-C motif chemokine receptor 10	45.6077	0.448403	1.36453	0.344065	1.30325	0.192489	0.349977	44.0395	16.9744	49.6997	26.632	54.1123	76.0629	60.9198	35.3988	46.7785	45.4592
508637	SUSD4	sushi domain containing 4	122.192	-0.388163	0.764102	0.297913	-1.30294	0.192595	0.349977	156.269	175.916	137.467	135.963	88.1257	96.0017	98.1486	60.4369	90.9092	182.679
513684	TCIRG1	T cell immune regulator 1, ATPase H+ transporting V0 subunit a3	82.8823	0.450476	1.36649	0.345722	1.303	0.192574	0.349977	38.357	58.6388	90.9399	82.6994	78.8493	58.3395	143.5	119.147	111.209	47.1429
504874	TRAPPC5	trafficking protein particle complex 5	47.2508	-0.377105	0.769981	0.289463	-1.30278	0.192652	0.349977	46.8808	61.7251	51.8146	68.6825	38.6516	37.6622	37.2288	25.0382	45.8959	58.9286
532844	ATP1B3	ATPase Na+/K+ transporting subunit beta 3	102.461	0.278407	1.21286	0.213869	1.30176	0.192997	0.350417	79.5553	117.278	70.8485	95.3145	100.494	103.386	118.455	110.513	141.218	87.5511
515022	CCS	copper chaperone for superoxide dismutase	3186.91	-0.400089	0.757812	0.30845	-1.29709	0.194599	0.353139	3898.21	3612.46	2947.09	5525.44	2148.26	4438.23	2220.87	1429.76	2352.17	3296.64
535424	ATL1	atlastin GTPase 1	86.7589	-0.380281	0.768288	0.293419	-1.29604	0.194963	0.35361	137.801	84.8719	101.514	107.93	59.5235	87.8785	70.3962	110.513	60.0177	47.1429
280758	DBH	dopamine beta-hydroxylase	27.3532	0.521063	1.43501	0.402235	1.29542	0.195176	0.353621	18.4682	26.2331	26.436	7.00842	33.2404	31.0159	42.6439	21.5846	45.0133	21.8878
515903	FOXP1	forkhead box P1	39.8296	0.39313	1.31324	0.303433	1.29561	0.195111	0.353621	34.0951	40.1213	17.9765	30.837	48.7011	48.0009	41.967	39.7157	37.9524	58.9286
511963	PDZRN4	PDZ domain containing ring finger 4	132.278	-0.220856	0.858056	0.170663	-1.29411	0.195629	0.354064	150.587	146.597	120.548	166.8	129.096	105.602	138.762	122.601	121.801	120.383
515314	TOX4	TOX high mobility group box family member 4	34.6595	0.429641	1.3469	0.331971	1.29421	0.195592	0.354064	24.1507	43.2075	26.436	39.2471	16.2337	52.4317	27.7524	42.3058	34.4219	40.4082
534625	CUEDC1	CUE domain containing 1	56.8745	-0.417574	0.748683	0.323078	-1.29248	0.196189	0.354702	73.8728	106.476	44.4125	61.6741	40.1977	53.9087	36.5519	31.9452	58.2525	61.4542
NA	LOC100139318	NA	62.2341	0.381439	1.30264	0.295106	1.29255	0.196167	0.354702	62.5077	46.2938	34.8955	44.8539	80.3954	42.0931	71.75	72.5243	80.3178	86.7093
529062	ANKRD28	ankyrin repeat domain 28	30.1179	0.505204	1.41932	0.391138	1.29163	0.196487	0.355051	11.365	26.2331	22.2062	14.0168	48.7011	28.8005	29.1061	44.0326	38.835	37.8827
617525	LIMD1	LIM domains containing 1	29.1849	-0.419091	0.747896	0.32462	-1.29102	0.196697	0.355054	31.2539	47.8369	28.5509	19.6236	39.4247	21.4158	20.3066	33.672	20.3001	29.4643
539920	LY6G6F	lymphocyte antigen 6 family member G6F	1001.54	0.218057	1.16317	0.168891	1.29111	0.196666	0.355054	890.735	967.54	1063.79	856.429	851.109	819.707	1099.94	1225.14	1330.98	910.027
515338	ACACB	acetyl-CoA carboxylase beta	201.778	-0.212688	0.862928	0.1648	-1.29058	0.19685	0.355143	247.19	234.555	240.039	166.8	195.577	200.865	205.097	176.994	173.875	176.786
533007	COG4	component of oligomeric golgi complex 4	47.508	0.334349	1.26081	0.259215	1.28985	0.197101	0.355293	35.5158	50.9232	46.5274	29.4354	47.155	41.3546	63.6274	63.8905	51.1916	45.4592
539530	TTLL1	tubulin tyrosine ligase like 1	48.6356	0.443191	1.35961	0.343629	1.28974	0.197142	0.355293	17.0476	26.2331	62.389	50.4606	48.7011	68.6782	58.2123	68.2074	48.5437	37.8827
513572	ERAP2	endoplasmic reticulum aminopeptidase 2	65.6554	0.390831	1.31115	0.303262	1.28876	0.197482	0.355343	35.5158	30.8625	61.3315	65.8791	88.1257	57.601	75.8113	63.8905	89.144	88.393
505791	TROAP	trophinin associated protein	48.0597	-0.396923	0.759476	0.307847	-1.28935	0.197276	0.355343	79.5553	63.2682	50.7571	40.6488	39.4247	35.4468	29.783	31.9452	61.7829	47.9848
506577	UBAP2	ubiquitin associated protein 2	216.638	0.256743	1.19478	0.199206	1.28883	0.197456	0.355343	153.428	216.038	166.018	228.474	222.633	196.434	237.587	195.125	311.563	239.082
513278	NOLC1	nucleolar and coiled-body phosphoprotein 1	35.2817	0.436891	1.35368	0.339094	1.28841	0.197603	0.355373	21.3095	33.9488	20.0914	28.0337	45.6089	31.0159	46.0283	25.0382	52.0742	49.6684
535232	KRT86	keratin 86	599.029	0.286743	1.21988	0.222635	1.28795	0.197764	0.355475	539.84	632.682	443.068	571.887	511.748	395.084	712.085	819.352	836.718	527.832
514111	ARMC6	armadillo repeat containing 6	48.22	0.576696	1.49143	0.448695	1.28527	0.198697	0.356775	18.4682	16.9744	94.1122	22.4269	40.1977	55.3856	77.842	57.8468	64.4308	34.5154
520174	NUP43	nucleoporin 43	87.6026	0.291608	1.224	0.226865	1.28538	0.198659	0.356775	68.1903	67.8976	82.4804	71.4859	102.04	129.233	85.2877	78.568	85.6135	105.23
509089	OCSTAMP	osteoclast stimulatory transmembrane protein	411.087	-0.396361	0.759772	0.308877	-1.28323	0.19941	0.357867	441.816	486.085	751.84	435.924	221.087	547.21	310.014	367.802	223.301	325.791
789464	FBXL16	F-box and leucine rich repeat protein 16	666.806	-0.324631	0.798503	0.253321	-1.2815	0.200017	0.358599	875.108	1013.83	559.386	643.373	616.88	379.576	599.045	745.101	800.53	435.23
533499	MMS19	MMS19 homolog, cytosolic iron-sulfur assembly component	78.8011	0.337641	1.26369	0.26348	1.28147	0.200028	0.358599	45.4602	61.7251	76.1357	64.4775	98.1752	112.248	64.9811	88.9286	71.4917	104.388
282684	CSNK1A1	casein kinase 1 alpha 1	1163.85	-0.395264	0.76035	0.308641	-1.28066	0.200314	0.358734	1545.65	1589.42	1375.73	1481.58	619.972	932.694	676.887	1046.42	1721.1	649.057
539619	LRRN1	leucine rich repeat neuronal 1	163.753	-0.312946	0.804996	0.244308	-1.28095	0.200211	0.358734	193.206	251.53	158.616	179.416	126.004	130.71	122.516	109.65	157.105	208.776
790164	SLAMF7	SLAM family member 7	39.8017	0.420426	1.33832	0.328389	1.28027	0.200451	0.35879	22.7301	21.6038	37.0104	50.4606	37.8786	52.4317	52.1203	56.12	43.2481	24.4133
539419	TBX20	T-box 20	101.241	0.513528	1.42754	0.401545	1.27888	0.200939	0.359475	46.8808	32.4057	80.3655	75.6909	179.344	122.587	127.932	74.2511	95.3223	177.628
529760	ADORA2B	adenosine A2b receptor	96.4915	-0.322605	0.799625	0.252442	-1.27794	0.201272	0.359882	122.174	95.6738	134.295	105.126	79.6224	121.848	83.934	88.9286	79.4352	53.8776
514906	DENND4A	DENN domain containing 4A	229.008	-0.202632	0.868964	0.159027	-1.27419	0.202595	0.361557	254.293	263.875	235.809	245.295	227.272	171.326	253.156	205.486	237.423	196.148
615867	HILS1	histone linker H1 domain, spermatid-specific 1	152.73	-0.335992	0.792239	0.263699	-1.27415	0.20261	0.361557	169.055	253.073	177.65	117.741	135.281	110.033	115.748	208.939	124.449	115.332
534377	SERGEF	secretion regulating guanine nucleotide exchange factor	25.8055	0.465215	1.38052	0.36489	1.27494	0.202329	0.361557	18.4682	12.345	15.8616	19.6236	40.1977	34.7083	23.691	29.3551	32.6567	31.148
518758	SLC25A20	solute carrier family 25 member 20	244.664	-0.224128	0.856112	0.175913	-1.27409	0.202633	0.361557	311.118	257.702	311.945	218.663	219.541	246.651	224.726	220.163	183.584	252.551
514398	SLA2	Src like adaptor 2	34.8769	-0.374848	0.771187	0.29432	-1.27361	0.202803	0.361671	46.8808	57.0957	31.7232	30.837	31.6943	33.9698	33.1674	22.448	25.5958	35.3572
516864	ALDH1L2	aldehyde dehydrogenase 1 family member L2	884.411	-0.181541	0.881761	0.142781	-1.27147	0.203562	0.362835	941.878	1149.63	805.77	859.232	944.646	743.644	857.615	811.582	950.575	779.542
504224	C15H11orf16	chromosome 15 C11orf16 homolog	185.073	0.239465	1.18056	0.188589	1.26978	0.204165	0.363718	144.904	199.063	140.64	201.842	163.883	197.173	239.618	201.169	210.062	152.373
520468	TMEM136	transmembrane protein 136	92.7023	0.347399	1.27226	0.273787	1.26886	0.204489	0.364107	58.2458	55.5525	71.906	86.9044	132.962	94.5248	119.809	120.01	77.67	109.439
520897	SDR39U1	short chain dehydrogenase/reductase family 39U member 1	239.638	-0.268486	0.83019	0.211652	-1.26853	0.20461	0.364131	217.356	358.005	203.029	257.91	273.654	155.818	238.941	259.015	235.658	196.99
536988	CAPN5	calpain 5	612.283	0.367814	1.2904	0.290185	1.26751	0.204971	0.364393	322.483	507.689	564.673	456.949	819.415	509.548	871.153	503.353	1058.25	509.312
538608	NRIP3	nuclear receptor interacting protein 3	100.549	0.285381	1.21873	0.225111	1.26774	0.204892	0.364393	89.4997	69.4407	69.7911	109.331	114.409	107.079	142.146	111.377	101.501	90.9185
100138312	ACSL3	acyl-CoA synthetase long chain family member 3	61.861	0.435288	1.35218	0.344537	1.2634	0.206446	0.365481	24.1507	35.4919	88.825	53.264	59.5235	46.5239	54.8278	94.1089	78.5526	83.3419
532778	ARFGAP3	ADP ribosylation factor GTPase activating protein 3	37.5973	0.373712	1.29568	0.295368	1.26524	0.205785	0.365481	24.1507	24.69	37.0104	50.4606	27.8292	50.9548	47.3821	36.2622	31.7741	45.4592
538835	ARHGAP30	Rho GTPase activating protein 30	81.6985	0.374638	1.29651	0.296329	1.26426	0.206137	0.365481	53.984	50.9232	48.6423	75.6909	124.458	77.5399	119.132	78.568	97.9701	90.0766
511899	INSIG1	insulin induced gene 1	29.3425	0.454152	1.36998	0.359574	1.26303	0.206579	0.365481	22.7301	20.0606	34.8955	14.0168	30.9213	43.57	25.0448	21.5846	31.7741	48.8266
783217	MLXIP	MLX interacting protein	176.238	0.273714	1.20892	0.216492	1.26432	0.206116	0.365481	170.476	137.338	190.339	126.152	172.386	223.758	196.974	232.25	190.645	122.066
539763	PARP11	poly(ADP-ribose) polymerase family member 11	113.711	-0.628786	0.64672	0.497226	-1.26459	0.206019	0.365481	203.15	177.46	44.4125	63.0758	202.535	46.5239	158.391	70.7975	142.983	27.7806
789791	RBAK	RB associated KRAB zinc finger	80.4679	0.39364	1.3137	0.311559	1.26345	0.206426	0.365481	42.6189	64.8113	120.548	54.6657	64.1617	135.141	66.3349	79.4314	76.7874	100.179
100848970	TCF25	transcription factor 25	103.51	0.399447	1.319	0.316159	1.26344	0.206432	0.365481	96.6029	67.8976	43.3551	88.3061	149.195	130.71	165.16	86.3385	100.618	106.913
538501	UNC119	unc-119 lipid binding chaperone	34.0326	0.465983	1.38126	0.369001	1.26282	0.206653	0.365481	21.3095	15.4313	27.4935	26.632	50.2471	23.6312	53.4741	44.0326	31.7741	46.3011
538284	USP15	ubiquitin specific peptidase 15	2447.11	-0.257674	0.836436	0.204047	-1.26282	0.206656	0.365481	2939.28	3694.24	1965.78	2621.15	2107.29	1731.72	2495.68	2457.19	2486.32	1972.43
538340	MAP3K9	mitogen-activated protein kinase kinase kinase 9	38.9711	0.508504	1.42257	0.402855	1.26225	0.206859	0.36565	14.2063	23.1469	53.9295	32.2387	36.3325	33.2314	62.9505	56.9834	56.4873	20.2041
282162	CAMK2G	calcium/calmodulin dependent protein kinase II gamma	184.291	0.277425	1.21203	0.22001	1.26096	0.207322	0.366089	170.476	137.338	131.123	179.416	213.357	180.926	175.991	183.038	178.288	292.96
537062	SLC27A6	solute carrier family 27 member 6	34.0506	0.40324	1.32247	0.319748	1.26112	0.207266	0.366089	22.7301	16.9744	26.436	35.0421	44.0629	36.9237	51.4434	28.4917	38.835	39.5664
282854	FUT4	fucosyltransferase 4	32.6855	0.366046	1.28882	0.290508	1.26002	0.207662	0.366501	22.7301	40.1213	21.1488	26.632	32.4674	36.1853	40.6132	45.7594	30.8915	30.3062
515590	HSPA12B	heat shock protein family A (Hsp70) member 12B	38.4003	-0.416338	0.749324	0.330583	-1.25941	0.207884	0.366701	51.1427	49.38	46.5274	44.8539	28.6022	56.8626	26.3986	20.7212	30.8915	28.6225
541259	CDH10	cadherin 10	32.7349	-0.410493	0.752366	0.326841	-1.25594	0.209138	0.368724	39.7776	49.38	41.2402	16.8202	39.4247	28.8005	26.3986	18.1311	37.0698	30.3062
514360	DSP	desmoplakin	75.5834	0.379432	1.30083	0.302311	1.25511	0.20944	0.368874	73.8728	40.1213	41.2402	78.4943	93.537	58.3395	81.2264	106.196	112.092	70.7144
504923	SLC7A4	solute carrier family 7 member 4	79.5467	0.387977	1.30856	0.309068	1.25531	0.209366	0.368874	53.984	98.7601	83.5378	67.2808	41.7438	59.8165	64.3042	92.3822	137.688	95.9695
786099	AARS2	alanyl-tRNA synthetase 2, mitochondrial	233.579	-0.325349	0.798105	0.25973	-1.25264	0.210336	0.369983	242.928	339.488	309.83	213.056	194.804	328.621	188.851	171.814	209.179	137.22
513051	MUTYH	mutY DNA glycosylase	24.0395	0.620783	1.53771	0.495643	1.25248	0.210395	0.369983	19.8888	15.4313	8.45952	5.60674	44.0629	26.5851	43.3207	27.6283	30.8915	18.5204
525480	SLC16A4	solute carrier family 16 member 4	158.789	-0.253129	0.839074	0.202103	-1.25248	0.210395	0.369983	193.206	188.261	181.88	163.997	137.6	201.604	131.316	116.557	142.983	130.485
615626	PTMA	prothymosin, alpha (gene sequence 28)	73.4061	0.385038	1.30589	0.307813	1.25089	0.210976	0.370814	48.3014	91.0445	42.2976	60.2724	76.5302	107.079	64.3042	108.786	89.144	46.3011
786336	PTMA	prothymosin alpha	73.4061	0.385038	1.30589	0.307813	1.25089	0.210976	0.370814	48.3014	91.0445	42.2976	60.2724	76.5302	107.079	64.3042	108.786	89.144	46.3011
514135	BCO2	beta-carotene oxygenase 2	27.6886	-0.494278	0.709917	0.39558	-1.2495	0.211482	0.371341	58.2458	20.0606	29.6083	19.6236	34.0134	21.4158	12.184	19.8578	27.361	34.5154
534029	IP6K1	inositol hexakisphosphate kinase 1	47.0641	0.410828	1.32945	0.328881	1.24917	0.211604	0.371341	51.1427	26.2331	28.5509	28.0337	66.4808	38.4007	62.2736	60.4369	65.3134	43.7756
NA	SRPR	NA	24.4267	0.443762	1.36015	0.355195	1.24935	0.211537	0.371341	14.2063	10.8019	21.1488	33.6404	23.191	21.4158	35.1981	32.8086	29.1262	22.7296
614912	KCTD17	potassium channel tetramerization domain containing 17	161.813	-0.371588	0.772931	0.297805	-1.24776	0.212121	0.371905	224.46	268.504	131.123	178.014	112.09	115.202	122.516	96.6991	144.749	224.771
618234	ZMYM6	zinc finger MYM-type containing 6	77.7463	-0.398621	0.758583	0.319486	-1.24769	0.212143	0.371905	72.4521	162.028	97.2845	70.0842	41.7438	73.8475	64.9811	72.5243	64.4308	58.0868
534040	SPINT1	serine peptidase inhibitor, Kunitz type 1	198.85	-0.300573	0.81193	0.241016	-1.24711	0.212358	0.37209	208.833	283.935	210.431	229.876	165.429	184.619	125.901	141.595	166.814	271.072
514231	ETV2	ETS variant 2	34.9012	-0.612708	0.653968	0.491531	-1.24653	0.212569	0.372269	73.8728	13.8881	48.6423	51.8623	23.191	54.6471	23.0141	20.7212	9.70875	29.4643
617222	DPP10	dipeptidyl peptidase like 10	61.4993	0.329236	1.25635	0.26471	1.24376	0.213588	0.373861	55.4046	57.0957	40.1827	42.0505	76.5302	48.7393	68.3656	62.1637	79.4352	85.0256
508893	TLE4	transducin like enhancer of split 4	295.741	0.259911	1.1974	0.209366	1.24142	0.214452	0.37518	225.88	274.676	249.556	277.533	316.943	189.788	338.443	344.49	367.167	372.934
782019	IER5L	immediate early response 5 like	23.8422	-0.44544	0.73436	0.359185	-1.24014	0.214922	0.375811	19.8888	32.4057	26.436	23.8286	34.7865	24.3697	25.7217	8.63385	23.8306	18.5204
615296	CERS1	ceramide synthase 1	36.9113	-0.441834	0.736198	0.356625	-1.23893	0.215371	0.376403	46.8808	58.6388	54.9869	32.2387	20.8719	47.2624	29.1061	19.8578	25.5958	33.6735
512341	MLYCD	malonyl-CoA decarboxylase	24.3087	-0.506832	0.703766	0.409324	-1.23822	0.215635	0.376478	14.2063	49.38	33.8381	22.4269	23.191	14.7695	24.3679	11.224	18.5349	31.148
782450	TOR1AIP2	torsin 1A interacting protein 2	561.966	-0.18351	0.880558	0.148194	-1.23831	0.2156	0.376478	745.831	567.87	530.835	627.954	517.932	518.409	536.094	576.741	537.512	460.485
539793	PPFIA4	PTPRF interacting protein alpha 4	1451.88	-0.164023	0.892533	0.132612	-1.23686	0.21614	0.377166	1559.85	1674.29	1263.64	1743.69	1432.43	1248.76	1362.57	1293.35	1468.67	1471.53
538204	PSMD12	proteasome 26S subunit, non-ATPase 12	205.918	0.219097	1.164	0.177303	1.23572	0.216564	0.377712	211.674	148.14	170.248	199.039	221.087	189.788	233.526	235.704	191.527	258.444
785970	NTN5	netrin 5	190.804	-0.272822	0.827699	0.221372	-1.23241	0.217794	0.379664	183.261	314.798	158.616	203.244	185.528	144.003	176.667	156.273	220.653	165
539906	CCDC185	coiled-coil domain containing 185	156.135	-0.271378	0.828528	0.220274	-1.232	0.21795	0.37974	166.214	248.443	153.329	120.545	166.202	149.91	132.67	107.06	155.34	161.633
281023	AP3D1	adaptor related protein complex 3 subunit delta 1	52.0465	0.520317	1.43427	0.422566	1.23133	0.2182	0.379983	39.7776	27.7763	19.0339	22.4269	102.813	53.9087	77.1651	64.7538	54.722	58.0868
281038	CASR	calcium sensing receptor	108.074	0.299103	1.23038	0.243057	1.23059	0.218477	0.380066	71.0315	75.6132	97.2845	95.3145	143.011	117.417	153.653	120.874	115.622	90.9185
520188	CDC25A	cell division cycle 25A	29.6627	-0.578529	0.669646	0.470041	-1.2308	0.218396	0.380066	44.0395	44.7507	14.8042	60.2724	14.6876	31.0159	16.9222	37.1255	22.0653	10.9439
537808	NRXN2	neurexin 2	1360.21	-0.262836	0.833448	0.213635	-1.23031	0.218582	0.380066	1504.45	1922.74	1176.93	1452.14	1363.63	998.418	1106.71	940.226	1334.51	1802.37
286858	PTGDS	prostaglandin D2 synthase	40.619	-0.300158	0.812163	0.244047	-1.22992	0.218727	0.380123	42.6189	41.6644	43.3551	44.8539	51.0202	40.6161	31.1368	32.8086	32.6567	45.4592
617776	OXLD1	oxidoreductase like domain containing 1	321.049	-0.358738	0.779846	0.291763	-1.22955	0.218864	0.38013	228.721	467.567	583.707	327.994	196.35	272.497	312.722	335.857	277.141	207.934
510658	SLC2A6	solute carrier family 2 member 6	167.72	-0.195718	0.873138	0.159209	-1.22931	0.218954	0.38013	166.214	211.408	154.386	190.629	173.932	141.787	157.038	142.458	165.931	173.419
538785	STAMBPL1	STAM binding protein like 1	34.326	0.611934	1.52831	0.498497	1.22756	0.219612	0.381079	15.6269	9.25876	21.1488	18.2219	69.573	60.5549	41.967	55.2566	24.7132	26.9388
NA	LINS	NA	26.9123	0.603089	1.51897	0.491474	1.2271	0.219784	0.381183	18.4682	6.17251	13.7467	22.4269	44.8359	59.8165	37.2288	26.7649	20.3001	19.3623
282229	FCGR2B	Fc fragment of IgG receptor IIb	56.809	0.439606	1.35623	0.358553	1.22606	0.220177	0.381671	22.7301	33.9488	82.4804	35.0421	64.9348	37.6622	71.75	75.9778	64.4308	79.1328
509432	ASPA	aspartoacylase	80.0186	-0.483402	0.715289	0.394481	-1.22541	0.22042	0.381703	132.119	92.5876	45.4699	142.972	54.1123	88.617	28.4292	63.0271	101.501	51.3521
520864	HIF1AN	hypoxia inducible factor 1 subunit alpha inhibitor	67.3537	-0.304231	0.809874	0.248244	-1.22553	0.220375	0.381703	72.4521	87.9582	83.5378	79.896	49.4741	79.7553	46.0283	61.3003	61.7829	51.3521
505350	TULP2	tubby like protein 2	47.3945	0.348873	1.27357	0.284838	1.22481	0.220646	0.3819	38.357	20.0606	61.3315	49.0589	38.6516	48.0009	54.1509	56.9834	45.8959	61.4542
533652	MLH1	mutL homolog 1	98.6697	0.241599	1.1823	0.19747	1.22347	0.221151	0.38258	80.9759	81.7857	86.7101	81.2977	119.047	112.987	105.594	88.0652	118.27	111.964
511619	AXIN2	axin 2	1999.65	0.277413	1.21202	0.226857	1.22285	0.221385	0.382707	1105.25	1989.09	1960.49	1941.33	2042.35	1551.54	1816.76	2060.9	2632.84	2895.92
664638	TAS2R16	taste 2 receptor member 16	101.615	0.521998	1.43594	0.426928	1.22268	0.221449	0.382707	113.65	21.6038	59.2167	58.8707	162.337	115.202	155.684	63.8905	102.383	163.317
504400	RBCK1	RANBP2-type and C3HC4-type zinc finger containing 1	353.821	-0.243317	0.8448	0.1992	-1.22147	0.221906	0.383303	377.888	487.628	317.232	385.463	350.957	231.881	358.75	418.742	331.863	277.806
534652	NEK9	NIMA related kinase 9	541.258	-0.235644	0.849306	0.193059	-1.22058	0.222244	0.383691	579.617	658.915	507.571	641.971	539.577	409.854	459.606	399.747	494.264	721.455
515469	FRMD8	FERM domain containing 8	108.884	-0.349688	0.784754	0.286747	-1.2195	0.222655	0.384206	100.865	174.373	131.123	128.955	75.7572	87.8785	84.6108	148.502	95.3223	61.4542
100139730	COL15A1	collagen type XV alpha 1 chain	447.077	-0.185187	0.879535	0.15194	-1.21882	0.222912	0.384319	548.363	470.654	405	472.367	483.145	395.084	442.684	341.037	416.594	495.842
511775	NSUN6	NOP2/Sun RNA methyltransferase family member 6	73.8709	0.311443	1.24095	0.255547	1.21873	0.222946	0.384319	65.349	63.2682	45.4699	81.2977	74.2111	50.9548	89.349	75.1145	92.6744	101.021
516941	NCKIPSD	NCK interacting protein with SH3 domain	79.8067	0.281665	1.2156	0.231328	1.2176	0.223377	0.384867	49.7221	67.8976	69.7911	78.4943	92.7639	67.9397	106.271	87.2018	98.8527	79.1328
617340	COL26A1	collagen type XXVI alpha 1 chain	149.362	0.243504	1.18386	0.20018	1.21643	0.223822	0.38544	117.912	145.054	146.984	123.348	149.195	110.771	146.208	183.038	179.171	191.939
613424	ARMC7	armadillo repeat containing 7	87.9467	-0.342424	0.788715	0.281627	-1.21588	0.224031	0.385556	86.6584	67.8976	120.548	120.545	95.8561	61.2934	113.04	95.8357	71.4917	46.3011
617377	ZNF408	zinc finger protein 408	84.1174	-0.430802	0.74185	0.354378	-1.21566	0.224116	0.385556	160.531	74.0701	103.629	86.9044	58.7505	132.925	68.3656	42.3058	55.6047	58.0868
505168	ANKS4B	ankyrin repeat and sterile alpha motif domain containing 4B	24.3755	-0.472023	0.720953	0.388706	-1.21434	0.224617	0.386223	31.2539	18.5175	29.6083	37.8455	24.737	36.9237	18.2759	9.49723	19.4175	17.6786
516493	POU2F3	POU class 2 homeobox 3	23.7965	0.484786	1.39938	0.39942	1.21372	0.224853	0.386434	17.0476	4.62938	21.1488	26.632	28.6022	29.539	30.4599	33.672	16.7697	29.4643
404123	FAHD2A	fumarylacetoacetate hydrolase domain containing 2A	101.603	-0.261672	0.834121	0.215933	-1.21182	0.22558	0.387293	113.65	101.846	142.754	110.733	85.8066	109.294	108.302	80.2948	91.7918	71.5562
326582	RPS12	ribosomal protein S12	50.6456	0.419787	1.33773	0.346345	1.21205	0.225494	0.387293	41.1983	32.4057	34.8955	51.8623	55.6584	62.0319	44.6745	62.1637	25.5958	95.9695
521864	VPS35	VPS35, retromer complex component	30.0164	0.470681	1.38576	0.388747	1.21076	0.225986	0.387794	19.8888	12.345	26.436	15.4185	49.4741	25.8466	39.2594	32.8086	45.0133	33.6735
525428	E2F4	E2F transcription factor 4	29.6146	0.49822	1.41247	0.411733	1.21006	0.226257	0.387869	8.52378	16.9744	40.1827	39.2471	17.7798	31.0159	52.7972	25.9015	30.8915	32.8317
515594	PRMT5	protein arginine methyltransferase 5	49.4074	-0.534469	0.690413	0.441667	-1.21012	0.226234	0.387869	96.6029	70.9838	40.1827	61.6741	23.964	80.4938	30.4599	45.7594	22.0653	21.8878
538998	FKBP2	FK506 binding protein 2	260.479	0.260467	1.19787	0.215393	1.20926	0.226562	0.388002	221.618	145.054	224.177	291.55	300.71	277.667	289.031	344.49	280.671	229.822
538974	TMEM19	transmembrane protein 19	406.662	-0.191737	0.875551	0.158519	-1.20955	0.22645	0.388002	433.292	466.024	381.736	468.162	419.757	290.959	405.455	442.053	415.711	343.47
538968	API5	apoptosis inhibitor 5	50.5671	-0.419685	0.747588	0.347248	-1.2086	0.226816	0.388046	49.7221	75.6132	87.7676	30.837	45.6089	71.6321	36.5519	43.1692	35.3045	29.4643
615849	RAB4A	RAB4A, member RAS oncogene family	34.1583	0.351949	1.27628	0.291135	1.20889	0.226706	0.388046	32.6745	21.6038	29.6083	23.8286	40.9707	44.3085	35.1981	33.672	30.8915	48.8266
514056	ITGAD	integrin subunit alpha D	118.302	-0.497022	0.708568	0.411612	-1.2075	0.227238	0.388574	170.476	149.683	189.282	100.921	82.7145	232.62	78.5189	72.5243	59.1351	47.1429
525380	IER2	immediate early response 2	36.7363	-0.37611	0.770512	0.311762	-1.2064	0.227663	0.389104	44.0395	55.5525	38.0679	33.6404	36.3325	28.062	20.3066	24.1748	46.7785	40.4082
[truncated: 6,583 more rows]
