# Supplementary material for: Hepatic transcriptome perturbations in dairy cows fed different forage resources
Source: BMC Genomics. 2021 Jan 7;22:35. doi: 10.1186/s12864-020-07332-0 (PMC7792104; doi:10.1186/s12864-020-07332-0)
Supplement: Supplementary file 3 — Additional file 3. Output of Database for Annotation, Visualization and Integrated Discovery (DAVID) analysis of the DEG. [file 12864_2020_7332_MOESM3_ESM.xlsx]

## Sheet: chart_up
Category	Term	Count	%	PValue	Genes	List Total	Pop Hits	Pop Total	Fold Enrichment	Bonferroni	Benjamini	FDR
GOTERM_CC_DIRECT	GO:0031012~extracellular matrix	5	6.17284	0.00160239	281386, 281342, 280958, 540664, 533203	68	116	15461	9.80033	0.156326	0.156326	1.78339
KEGG_PATHWAY	bta04512:ECM-receptor interaction	4	4.93827	0.00575927	520167, 282882, 280958, 540664	33	87	7550	10.519	0.491242	0.491242	6.38687
GOTERM_BP_DIRECT	GO:0007155~cell adhesion	5	6.17284	0.00631438	521837, 281614, 282882, 280958, 540664	60	173	13824	6.65896	0.847611	0.847611	8.10439
KEGG_PATHWAY	bta05231:Choline metabolism in cancer	4	4.93827	0.00823478	404181, 519461, 507455, 522866	33	99	7550	9.24395	0.619952	0.38352	9.01593
UP_KEYWORDS	Calcium	7	8.64198	0.0106272	533360, 522347, 282689, 784716, 522866, 281342, 533203	80	418	17808	3.72775	0.684591	0.684591	11.3348
GOTERM_CC_DIRECT	GO:0005829~cytosol	11	13.5802	0.0123675	531699, 517656, 515563, 525042, 533360, 515556, 515890, 282689, 522866, 537312, 497204	68	1025	15461	2.44004	0.732633	0.482924	13.033
GOTERM_BP_DIRECT	GO:0007599~hemostasis	2	2.46914	0.0127502	533360, 280958	60	3	13824	153.6	0.977877	0.851263	15.7358
GOTERM_BP_DIRECT	GO:0036035~osteoclast development	2	2.46914	0.0169646	513994, 282689	60	4	13824	115.2	0.993791	0.8162	20.4109
GOTERM_CC_DIRECT	GO:0035749~myelin sheath adaxonal region	2	2.46914	0.0172232	282689, 528109	68	4	15461	113.684	0.841432	0.45874	17.7121
GOTERM_CC_DIRECT	GO:0070062~extracellular exosome	17	20.9877	0.020312	540815, 539784, 534482, 533360, 281386, 282689, 515890, 505069, 281342, 282882, 280958, 528109, 525042, 281614, 520167, 506911, 527391	68	2162	15461	1.78781	0.886418	0.419467	20.5679
GOTERM_CC_DIRECT	GO:0005654~nucleoplasm	12	14.8148	0.0243812	517656, 404181, 614893, 615135, 532845, 509072, 782214, 527349, 540254, 515218, 523714, 528109	68	1310	15461	2.08276	0.926937	0.40743	24.1924
INTERPRO	IPR027417:P-loop containing nucleoside triphosphate hydrolase	9	11.1111	0.0256578	513994, 287019, 506315, 777770, 528870, 506911, 613313, 528109, 790891	74	821	16802	2.48902	0.998329	0.998329	28.5958
GOTERM_BP_DIRECT	GO:0002011~morphogenesis of an epithelial sheet	2	2.46914	0.0336462	528109, 540393	60	8	13824	57.6	0.999962	0.92123	36.6599
GOTERM_MF_DIRECT	GO:0005509~calcium ion binding	7	8.64198	0.0343652	534482, 533360, 522347, 282689, 784716, 790867, 533203	57	571	13095	2.81639	0.986449	0.986449	33.1836
GOTERM_BP_DIRECT	GO:0006956~complement activation	2	2.46914	0.0377729	522347, 527391	60	9	13824	51.2	0.999989	0.898448	40.1753
GOTERM_CC_DIRECT	GO:0043220~Schmidt-Lanterman incisure	2	2.46914	0.0383419	282689, 528109	68	9	15461	50.5261	0.984144	0.498775	35.5126
UP_KEYWORDS	Cell adhesion	4	4.93827	0.0387301	521837, 281614, 282882, 280958	80	168	17808	5.3	0.985962	0.881519	35.9029
KEGG_PATHWAY	bta04610:Complement and coagulation cascades	3	3.7037	0.0388995	522347, 527391, 280958	33	74	7550	9.27518	0.990363	0.787194	36.4516
GOTERM_BP_DIRECT	GO:0001953~negative regulation of cell-matrix adhesion	2	2.46914	0.0459745	539020, 281342	60	11	13824	41.8909	0.999999	0.902676	46.6323
UP_KEYWORDS	Calcium/phospholipid-binding	2	2.46914	0.0477433	533360, 282689	80	11	17808	40.4727	0.994925	0.828152	42.3538
GOTERM_BP_DIRECT	GO:0035024~negative regulation of Rho protein signal transduction	2	2.46914	0.0500495	539020, 281342	60	12	13824	38.4	1	0.88679	49.5949
INTERPRO	IPR001464:Annexin	2	2.46914	0.0509249	533360, 282689	74	12	16802	37.8423	0.999997	0.998386	49.2003
INTERPRO	IPR018252:Annexin repeat, conserved site	2	2.46914	0.0509249	533360, 282689	74	12	16802	37.8423	0.999997	0.998386	49.2003
INTERPRO	IPR018502:Annexin repeat	2	2.46914	0.0509249	533360, 282689	74	12	16802	37.8423	0.999997	0.998386	49.2003
UP_KEYWORDS	Annexin	2	2.46914	0.0519703	533360, 282689	80	12	17808	37.1	0.996861	0.763303	45.1704
SMART	SM00335:ANX	2	2.46914	0.0522842	533360, 282689	40	12	8740	36.4167	0.97262	0.97262	42.3494
KEGG_PATHWAY	bta04122:Sulfur relay system	2	2.46914	0.0537613	517656, 515890	33	13	7550	35.1981	0.998444	0.801381	46.8177
KEGG_PATHWAY	bta04510:Focal adhesion	4	4.93827	0.0569396	520167, 282882, 280958, 540664	33	208	7550	4.39977	0.99895	0.746356	48.8234
KEGG_PATHWAY	bta04151:PI3K-Akt signaling pathway	5	6.17284	0.0572173	404181, 520167, 282882, 280958, 540664	33	347	7550	3.29666	0.998986	0.683024	48.9954
UP_KEYWORDS	Phosphoprotein	18	22.2222	0.0622255	614893, 539784, 534482, 519461, 287019, 281386, 515556, 282689, 337889, 538595, 508904, 281918, 523714, 281939, 404181, 525042, 540254, 510678	80	2603	17808	1.5393	0.99903	0.750353	51.4904
INTERPRO	IPR012675:Beta-grasp domain	2	2.46914	0.0632512	531699, 515890	74	15	16802	30.2739	1	0.995289	57.1162
UP_SEQ_FEATURE	repeat:Annexin 4	2	2.46914	0.0650524	533360, 282689	36	12	6267	29.0139	0.999894	0.999894	54.5983
UP_SEQ_FEATURE	repeat:Annexin 2	2	2.46914	0.0650524	533360, 282689	36	12	6267	29.0139	0.999894	0.999894	54.5983
UP_SEQ_FEATURE	repeat:Annexin 1	2	2.46914	0.0650524	533360, 282689	36	12	6267	29.0139	0.999894	0.999894	54.5983
UP_SEQ_FEATURE	repeat:Annexin 3	2	2.46914	0.0650524	533360, 282689	36	12	6267	29.0139	0.999894	0.999894	54.5983
GOTERM_MF_DIRECT	GO:0048306~calcium-dependent protein binding	2	2.46914	0.0663085	533360, 282689	57	16	13095	28.7171	0.999784	0.985293	54.6657
GOTERM_MF_DIRECT	GO:0042803~protein homodimerization activity	4	4.93827	0.0714839	525042, 337889, 540254, 280958	57	225	13095	4.08421	0.999891	0.952207	57.4801
KEGG_PATHWAY	bta04931:Insulin resistance	3	3.7037	0.0798766	404181, 506812, 538465	33	111	7550	6.18346	0.999941	0.751279	61.3739
COG_ONTOLOGY	Posttranslational modification, protein turnover, chaperones	3	3.7037	0.0896832	517656, 539784, 529891	8	124	1671	5.05343	0.374881	0.374881	33.5453
GOTERM_BP_DIRECT	GO:0007528~neuromuscular junction development	2	2.46914	0.0898695	520167, 540664	60	22	13824	20.9455	1	0.96968	71.5332
KEGG_PATHWAY	bta04152:AMPK signaling pathway	3	3.7037	0.0912757	404181, 287019, 506812	33	120	7550	5.7197	0.999986	0.753356	66.5021
UP_KEYWORDS	Extracellular matrix	3	3.7037	0.0924744	282689, 281342, 280958	80	115	17808	5.80696	0.999972	0.825635	66.4656
SMART	SM00239:C2	3	3.7037	0.0928745	515556, 527349, 522866	40	115	8740	5.7	0.998542	0.961818	63.2021

## Sheet: cluster_up
Annotation Cluster 1	Enrichment Score: 1.7315900433598763
Category	Term	Count	%	PValue	Genes	List Total	Pop Hits	Pop Total	Fold Enrichment	Bonferroni	Benjamini	FDR
KEGG_PATHWAY	bta04512:ECM-receptor interaction	4	4.93827	0.00575927	520167, 282882, 280958, 540664	33	87	7550	10.519	0.491242	0.491242	6.38687
GOTERM_BP_DIRECT	GO:0007155~cell adhesion	5	6.17284	0.00631438	521837, 281614, 282882, 280958, 540664	60	173	13824	6.65896	0.847611	0.847611	8.10439
KEGG_PATHWAY	bta04510:Focal adhesion	4	4.93827	0.0569396	520167, 282882, 280958, 540664	33	208	7550	4.39977	0.99895	0.819997	48.8234
KEGG_PATHWAY	bta04151:PI3K-Akt signaling pathway	5	6.17284	0.0572173	404181, 520167, 282882, 280958, 540664	33	347	7550	3.29666	0.998986	0.748098	48.9954
Annotation Cluster 2	Enrichment Score: 1.2220228250765761
Category	Term	Count	%	PValue	Genes	List Total	Pop Hits	Pop Total	Fold Enrichment	Bonferroni	Benjamini	FDR
GOTERM_CC_DIRECT	GO:0031012~extracellular matrix	5	6.17284	0.00160239	281386, 281342, 280958, 540664, 533203	68	116	15461	9.80033	0.156326	0.156326	1.78339
UP_KEYWORDS	Secreted	6	7.40741	0.341142	534482, 281386, 282689, 280880, 281342, 280958	80	868	17808	1.53871	1	0.983371	99.0888
GOTERM_CC_DIRECT	GO:0005615~extracellular space	6	7.40741	0.394665	534482, 281386, 522347, 282689, 281342, 540664	68	950	15461	1.43601	1	0.9995	99.6421
Annotation Cluster 3	Enrichment Score: 0.7839658518247364
Category	Term	Count	%	PValue	Genes	List Total	Pop Hits	Pop Total	Fold Enrichment	Bonferroni	Benjamini	FDR
INTERPRO	IPR027417:P-loop containing nucleoside triphosphate hydrolase	9	11.1111	0.0256578	513994, 287019, 506315, 777770, 528870, 506911, 613313, 528109, 790891	74	821	16802	2.48902	0.998329	0.998329	28.5958
GOTERM_MF_DIRECT	GO:0005525~GTP binding	4	4.93827	0.182926	513994, 506315, 506911, 613313	57	345	13095	2.66362	1	0.997995	90.2654
UP_KEYWORDS	GTP-binding	3	3.7037	0.276706	506315, 506911, 613313	80	233	17808	2.86609	1	0.987389	97.3945
UP_KEYWORDS	Nucleotide-binding	6	7.40741	0.563148	404181, 287019, 506315, 777770, 506911, 613313	80	1124	17808	1.18826	1	0.990972	99.9911
Annotation Cluster 4	Enrichment Score: 0.6804802251305909
Category	Term	Count	%	PValue	Genes	List Total	Pop Hits	Pop Total	Fold Enrichment	Bonferroni	Benjamini	FDR
GOTERM_BP_DIRECT	GO:0007155~cell adhesion	5	6.17284	0.00631438	521837, 281614, 282882, 280958, 540664	60	173	13824	6.65896	0.847611	0.847611	8.10439
UP_KEYWORDS	Cell adhesion	4	4.93827	0.0387301	521837, 281614, 282882, 280958	80	168	17808	5.3	0.985962	0.881519	35.9029
UP_KEYWORDS	Signal	17	20.9877	0.175133	534482, 281386, 522347, 522866, 281342, 282882, 280958, 540664, 521837, 509263, 281614, 520167, 782214, 784716, 280880, 527391, 533203	80	2817	17808	1.34334	1	0.984372	88.5584
UP_SEQ_FEATURE	signal peptide	8	9.87654	0.330261	521837, 534482, 281614, 281386, 280880, 281342, 282882, 280958	36	1010	6267	1.37888	1	1	99.0957
UP_KEYWORDS	Glycoprotein	7	8.64198	0.408066	521837, 534482, 519461, 281614, 281386, 507455, 280958	80	1157	17808	1.34676	1	0.991078	99.7272
UP_KEYWORDS	Disulfide bond	9	11.1111	0.446295	521837, 534482, 281614, 520167, 522347, 281342, 527391, 280958, 533203	80	1643	17808	1.21935	1	0.992634	99.8714
UP_SEQ_FEATURE	glycosylation site:N-linked (GlcNAc...)	7	8.64198	0.481848	521837, 534482, 519461, 281614, 281386, 507455, 280958	36	988	6267	1.23338	1	1	99.9555
UP_SEQ_FEATURE	disulfide bond	5	6.17284	0.699476	521837, 534482, 281614, 281342, 280958	36	830	6267	1.04869	1	1	99.9999
UP_SEQ_FEATURE	transmembrane region	6	7.40741	0.865048	521837, 519461, 281614, 507455, 537067, 281918	36	1269	6267	0.823089	1	1	100
Annotation Cluster 5	Enrichment Score: 0.4119946445305184
Category	Term	Count	%	PValue	Genes	List Total	Pop Hits	Pop Total	Fold Enrichment	Bonferroni	Benjamini	FDR
GOTERM_MF_DIRECT	GO:0004672~protein kinase activity	3	3.7037	0.117655	404181, 513994, 538465	57	138	13095	4.99428	1	0.994096	76.3857
GOTERM_MF_DIRECT	GO:0005524~ATP binding	7	8.64198	0.427067	404181, 513994, 287019, 777770, 528870, 790891, 538465	57	1224	13095	1.31385	1	0.999989	99.8375
SMART	SM00220:S_TKc	3	3.7037	0.448627	404181, 513994, 538465	40	338	8740	1.93935	1	1	99.7771
INTERPRO	IPR000719:Protein kinase, catalytic domain	3	3.7037	0.600326	404181, 513994, 538465	74	462	16802	1.47438	1	1	99.9993
INTERPRO	IPR011009:Protein kinase-like domain	3	3.7037	0.643645	404181, 513994, 538465	74	500	16802	1.36232	1	1	99.9998
Annotation Cluster 6	Enrichment Score: 0.28730830031071153
Category	Term	Count	%	PValue	Genes	List Total	Pop Hits	Pop Total	Fold Enrichment	Bonferroni	Benjamini	FDR
GOTERM_CC_DIRECT	GO:0005887~integral component of plasma membrane	6	7.40741	0.282076	519461, 281614, 509031, 782214, 537067, 505069	68	820	15461	1.66367	1	0.999111	97.5731
UP_KEYWORDS	Ion transport	3	3.7037	0.5093	519461, 509031, 537067	80	383	17808	1.7436	1	0.991815	99.967
UP_KEYWORDS	Transport	3	3.7037	0.956612	519461, 509031, 537067	80	1079	17808	0.618906	1	0.999992	100
Annotation Cluster 7	Enrichment Score: 0.2717550578765234
Category	Term	Count	%	PValue	Genes	List Total	Pop Hits	Pop Total	Fold Enrichment	Bonferroni	Benjamini	FDR
UP_SEQ_FEATURE	nucleotide phosphate-binding region:ATP	3	3.7037	0.379946	404181, 287019, 777770	36	235	6267	2.22234	1	1	99.6341
GOTERM_MF_DIRECT	GO:0005524~ATP binding	7	8.64198	0.427067	404181, 513994, 287019, 777770, 528870, 790891, 538465	57	1224	13095	1.31385	1	0.999989	99.8375
UP_KEYWORDS	Nucleotide-binding	6	7.40741	0.563148	404181, 287019, 506315, 777770, 506911, 613313	80	1124	17808	1.18826	1	0.990972	99.9911
UP_KEYWORDS	ATP-binding	3	3.7037	0.895653	404181, 287019, 777770	80	848	17808	0.7875	1	0.999881	100
Annotation Cluster 8	Enrichment Score: 0.19636558288599826
Category	Term	Count	%	PValue	Genes	List Total	Pop Hits	Pop Total	Fold Enrichment	Bonferroni	Benjamini	FDR
UP_KEYWORDS	Transcription regulation	4	4.93827	0.541745	535982, 614893, 509072, 538465	80	638	17808	1.39561	1	0.992969	99.9847
UP_KEYWORDS	Transcription	4	4.93827	0.600397	535982, 614893, 509072, 538465	80	695	17808	1.28115	1	0.991062	99.9967
UP_KEYWORDS	Nucleus	9	11.1111	0.685532	535982, 614893, 509072, 540254, 538595, 523714, 538465, 281939, 510678	80	2019	17808	0.992273	1	0.994516	99.9998
GOTERM_BP_DIRECT	GO:0006351~transcription, DNA-templated	3	3.7037	0.734982	535982, 614893, 538465	60	603	13824	1.14627	1	1	100
Annotation Cluster 9	Enrichment Score: 0.012046958072335941
Category	Term	Count	%	PValue	Genes	List Total	Pop Hits	Pop Total	Fold Enrichment	Bonferroni	Benjamini	FDR
UP_KEYWORDS	Membrane	20	24.6914	0.947145	789234, 519461, 509031, 287012, 507455, 506812, 517332, 281918, 505069, 281342, 282882, 521837, 404181, 509263, 281614, 444879, 784716, 537067, 506911, 613313	80	5650	17808	0.787965	1	0.999988	100
UP_KEYWORDS	Transmembrane helix	16	19.7531	0.972578	789234, 519461, 509031, 507455, 506812, 517332, 505069, 281918, 282882, 521837, 509263, 281614, 444879, 784716, 537067, 613313	80	4935	17808	0.721702	1	0.999996	100
UP_KEYWORDS	Transmembrane	16	19.7531	0.973778	789234, 519461, 509031, 507455, 506812, 517332, 505069, 281918, 282882, 521837, 509263, 281614, 444879, 784716, 537067, 613313	80	4953	17808	0.719079	1	0.999995	100
GOTERM_CC_DIRECT	GO:0016021~integral component of membrane	10	12.3457	0.997726	521837, 789234, 509263, 281614, 507455, 506812, 784716, 517332, 281918, 613313	68	4185	15461	0.543292	1	1	100

## Sheet: chart_down
Category	Term	Count	%	PValue	Genes	List Total	Pop Hits	Pop Total	Fold Enrichment	Bonferroni	Benjamini	FDR
GOTERM_MF_DIRECT	GO:0044822~poly(A) RNA binding	39	9.39759	8.23397e-05	506730, 506656, 537453, 514472, 507640, 506358, 513577, 787914, 539807, 507804, 613725, 537675, 514449, 515573, 538553, 782848, 281039, 510132, 509913, 507828, 521540, 507066, 326602, 532701, 534704, 517743, 407129, 787681, 281419, 532842, 513083, 282034, 538525, 507270, 513128, 523206, 514870, 507116, 539602	310	840	13095	1.96123	0.0340724	0.0340724	0.115641
UP_KEYWORDS	Coiled coil	81	19.5181	0.00011929	539785, 513277, 515669, 540689, 509963, 522380, 538685, 616487, 527084, 614775, 513998, 516258, 506194, 787914, 508541, 511110, 507869, 507864, 527539, 538553, 524142, 505453, 506434, 513078, 513928, 100139857, 533611, 526435, 100138953, 767930, 518494, 534624, 524491, 614679, 541250, 508607, 530962, 519774, 286811, 515112, 539602, 508592, 506730, 517133, 511036, 507169, 513493, 508353, 516048, 5…	411	2319	17808	1.51341	0.0292681	0.0292681	0.154761
UP_KEYWORDS	Phosphoprotein	85	20.4819	0.000684293	786335, 505242, 513277, 538745, 514472, 618020, 525389, 100141289, 787914, 508541, 281661, 511110, 539591, 509246, 505809, 282187, 510684, 540329, 613381, 534583, 504519, 507066, 614679, 541250, 280677, 615289, 787681, 493720, 539646, 507270, 286811, 777771, 508591, 540564, 539602, 338085, 615171, 506656, 282375, 614804, 507837, 281500, 525116, 281879, 616139, 534216, 512977, 512029, 282446, 1001…	411	2603	17808	1.41488	0.156713	0.0816931	0.884769
SMART	SM00314:RA	6	1.44578	0.000741729	785402, 513493, 407210, 505541, 504334, 282337	216	30	8740	8.09259	0.151873	0.151873	0.941443
GOTERM_MF_DIRECT	GO:0003684~damaged DNA binding	7	1.68675	0.000876204	510132, 512977, 513458, 505453, 522943, 513606, 540564	310	48	13095	6.16028	0.308605	0.168498	1.22422
INTERPRO	IPR000159:Ras-association	6	1.44578	0.00132287	785402, 513493, 407210, 505541, 504334, 282337	388	36	16802	7.21735	0.692962	0.692962	2.03991
GOTERM_CC_DIRECT	GO:0005730~nucleolus	27	6.50602	0.00227772	511555, 525389, 507640, 616487, 540661, 281879, 787914, 538657, 538936, 512977, 537675, 506018, 538615, 618485, 613381, 509913, 767873, 613305, 523474, 522943, 534251, 517743, 615289, 513128, 286811, 534170, 539602	364	605	15461	1.89559	0.528814	0.528814	3.04415
UP_KEYWORDS	RNA-binding	14	3.37349	0.00600807	511555, 522824, 444990, 507640, 507828, 507066, 523474, 326602, 506889, 787681, 534216, 615240, 777771, 523206	411	253	17808	2.39762	0.776986	0.393575	7.52544
GOTERM_BP_DIRECT	GO:0040018~positive regulation of multicellular organism growth	5	1.20482	0.00649183	532120, 281419, 282375, 533611, 537578	338	31	13824	6.59668	0.999783	0.999783	10.0838
KEGG_PATHWAY	bta04972:Pancreatic secretion	8	1.92771	0.00714349	280748, 100139105, 528454, 505740, 515669, 540568, 506243, 281879	178	96	7550	3.53464	0.803559	0.803559	8.7638
GOTERM_CC_DIRECT	GO:0016020~membrane	34	8.19277	0.00770413	786335, 505242, 618127, 513493, 508353, 507837, 282648, 527084, 537578, 787914, 514449, 282121, 518158, 538553, 520580, 513078, 533611, 100138953, 281039, 510029, 510132, 534624, 326602, 523474, 505290, 506131, 281419, 618232, 281174, 404148, 539646, 507270, 513128, 536073	364	902	15461	1.60106	0.92209	0.720877	9.95405
GOTERM_MF_DIRECT	GO:0004003~ATP-dependent DNA helicase activity	4	0.963855	0.00816296	510132, 505721, 507984, 522943	310	18	13095	9.3871	0.968277	0.683438	10.879
GOTERM_BP_DIRECT	GO:0035195~gene silencing by miRNA	3	0.722892	0.00832937	505059, 286811, 523206	338	6	13824	20.4497	0.99998	0.995554	12.7597
GOTERM_BP_DIRECT	GO:0042384~cilium assembly	8	1.92771	0.00850844	100138953, 535844, 541215, 534475, 513998, 528348, 523793, 533611	338	95	13824	3.44416	0.999984	0.974991	13.0165
GOTERM_MF_DIRECT	GO:0003723~RNA binding	14	3.37349	0.00889878	511555, 508825, 510075, 506018, 537453, 787681, 615240, 338067, 507640, 613305, 507828, 513128, 777771, 523474	310	260	13095	2.27457	0.97679	0.60968	11.8036
UP_KEYWORDS	Lyase	8	1.92771	0.00974054	511749, 505740, 540303, 533048, 528582, 512771, 522515, 540335	411	103	17808	3.36532	0.912602	0.45628	11.9336
KEGG_PATHWAY	bta04925:Aldosterone synthesis and secretion	7	1.68675	0.0103159	505740, 506967, 515669, 533048, 281299, 513928, 281879	178	79	7550	3.75836	0.905	0.691779	12.424
GOTERM_CC_DIRECT	GO:0034464~BBSome	3	0.722892	0.010677	100138953, 532120, 533611	364	7	15461	18.2037	0.971055	0.692962	13.5434
GOTERM_CC_DIRECT	GO:0005814~centriole	7	1.68675	0.0133358	532120, 530962, 529230, 517994, 541215, 513998, 528348	364	83	15461	3.58225	0.988091	0.669652	16.6408
UP_KEYWORDS	Cell projection	12	2.89157	0.0137478	532120, 100141021, 511110, 505242, 523327, 512029, 504482, 517994, 507837, 539602, 280678, 533611	411	221	17808	2.35268	0.968157	0.498117	16.4498
GOTERM_CC_DIRECT	GO:0005793~endoplasmic reticulum-Golgi intermediate compartment	5	1.20482	0.0140385	514485, 613954, 404191, 539132, 614775	364	40	15461	5.30941	0.990586	0.606669	17.442
GOTERM_BP_DIRECT	GO:0035058~nonmotile primary cilium assembly	4	0.963855	0.0177169	100138953, 532120, 538960, 533611	338	23	13824	7.11294	1	0.996934	25.3031
KEGG_PATHWAY	bta04141:Protein processing in endoplasmic reticulum	10	2.40964	0.0177314	281661, 614538, 407129, 530858, 338067, 506103, 537380, 513928, 508465, 540564	178	169	7550	2.50981	0.982771	0.741722	20.4579
GOTERM_MF_DIRECT	GO:0098641~cadherin binding involved in cell-cell adhesion	6	1.44578	0.0184717	513277, 539646, 504482, 532723, 507270, 513128	310	65	13095	3.89926	0.99961	0.791926	23.0481
UP_KEYWORDS	Glycolysis	4	0.963855	0.0191387	510616, 540303, 404148, 518158	411	25	17808	6.93255	0.991866	0.551548	22.1885
GOTERM_CC_DIRECT	GO:0070062~extracellular exosome	66	15.9036	0.0194502	618127, 505242, 517987, 540689, 528379, 514472, 535844, 615866, 507188, 281421, 520625, 507804, 281661, 100139105, 538348, 404191, 538553, 509246, 513078, 100139857, 509241, 614538, 613932, 504519, 532723, 524491, 507066, 326602, 280677, 615289, 281419, 534082, 513128, 515687, 515440, 507837, 519558, 281500, 540335, 537578, 100141021, 526949, 613725, 513700, 514939, 281489, 513267, 513158, 513967…	364	2162	15461	1.29666	0.998469	0.660507	23.3781
GOTERM_CC_DIRECT	GO:0005913~cell-cell adherens junction	7	1.68675	0.0211805	513277, 539646, 504482, 532723, 507270, 513128, 281128	364	92	15461	3.23181	0.999145	0.635502	25.1909
UP_KEYWORDS	Sulfation	4	0.963855	0.0212736	404191, 281168, 281477, 280678	411	26	17808	6.66592	0.995272	0.534619	24.3589
GOTERM_BP_DIRECT	GO:0006289~nucleotide-excision repair	4	0.963855	0.0222031	512977, 513458, 507984, 540564	338	25	13824	6.54391	1	0.997019	30.68
GOTERM_BP_DIRECT	GO:0006096~glycolytic process	4	0.963855	0.0222031	510616, 540303, 404148, 518158	338	25	13824	6.54391	1	0.997019	30.68
KEGG_PATHWAY	bta01130:Biosynthesis of antibiotics	11	2.6506	0.0228005	768058, 538104, 513967, 521401, 540303, 404148, 518158, 282446, 514939, 506459, 512771	178	206	7550	2.26492	0.994677	0.729885	25.5525
GOTERM_BP_DIRECT	GO:0098609~cell-cell adhesion	6	1.44578	0.0235682	513277, 539646, 504482, 532723, 507270, 513128	338	67	13824	3.66263	1	0.994187	32.2426
GOTERM_BP_DIRECT	GO:0050885~neuromuscular process controlling balance	5	1.20482	0.0235858	505740, 282648, 522188, 781073, 522943	338	45	13824	4.54438	1	0.987913	32.2626
GOTERM_CC_DIRECT	GO:0005654~nucleoplasm	43	10.3614	0.0239356	511555, 512840, 511036, 515669, 282375, 514472, 516048, 515997, 281879, 506359, 508541, 507804, 512977, 534216, 514449, 515301, 506459, 524142, 616115, 513606, 532791, 767930, 510029, 510132, 613265, 510684, 618485, 767873, 538796, 507066, 511970, 614679, 281368, 512685, 534251, 524075, 506967, 513083, 282034, 536073, 528348, 524314, 338085	364	1310	15461	1.39423	0.999663	0.631881	27.9956
GOTERM_CC_DIRECT	GO:0005829~cytosol	35	8.43373	0.0262385	510616, 540689, 507837, 513397, 281421, 281661, 538348, 613725, 512029, 520388, 530858, 541215, 512771, 616115, 614554, 282652, 281039, 510684, 522824, 509914, 534607, 100124502, 326602, 541250, 616537, 512685, 404146, 523325, 615289, 507340, 404148, 615240, 539646, 286811, 529235	364	1025	15461	1.45038	0.999845	0.62278	30.265
GOTERM_CC_DIRECT	GO:0098793~presynapse	5	1.20482	0.0314467	523325, 540545, 530858, 528379, 282648	364	51	15461	4.16424	0.999974	0.651602	35.1552
GOTERM_BP_DIRECT	GO:0007191~adenylate cyclase-activating dopamine receptor signaling pathway	3	0.722892	0.0332797	505242, 505740, 537043	338	12	13824	10.2249	1	0.995826	42.4413
UP_KEYWORDS	Lysosome	7	1.68675	0.0344418	616003, 537087, 518169, 515687, 507188, 281421, 504503	411	105	17808	2.88856	0.999838	0.664085	36.5572
UP_KEYWORDS	Actin-binding	8	1.92771	0.0355494	506730, 100141021, 534583, 504482, 504519, 513267, 537578, 532964	411	134	17808	2.58677	0.999878	0.632651	37.4956
UP_KEYWORDS	Acetylation	48	11.5663	0.0357397	505242, 513277, 444990, 514472, 618020, 508541, 787914, 539591, 512977, 512029, 514449, 282446, 505809, 509246, 512771, 520580, 282710, 513267, 282206, 510029, 281039, 510075, 614538, 100139910, 613265, 540303, 509914, 512642, 613381, 532723, 504519, 507828, 521540, 507066, 511970, 326602, 532701, 523474, 286861, 510440, 281419, 507340, 404148, 615240, 507270, 513128, 523206, 539602	411	1564	17808	1.32977	0.999884	0.595947	37.6555
GOTERM_BP_DIRECT	GO:0050821~protein stabilization	7	1.68675	0.0384945	523325, 281419, 530858, 100141289, 521540, 282337, 516557	338	102	13824	2.80682	1	0.996477	47.3044
GOTERM_CC_DIRECT	GO:0032040~small-subunit processome	4	0.963855	0.0385247	537675, 509913, 514870, 539602	364	32	15461	5.30941	0.999998	0.692288	41.2929
GOTERM_BP_DIRECT	GO:0000723~telomere maintenance	3	0.722892	0.0387079	510132, 505721, 522943	338	13	13824	9.43832	1	0.993978	47.495
INTERPRO	IPR000980:SH2 domain	7	1.68675	0.0387496	508541, 282375, 615866, 407210, 509246, 515820, 617777	388	108	16802	2.80675	1	1	45.9527
KEGG_PATHWAY	bta01200:Carbon metabolism	7	1.68675	0.042556	507817, 540303, 404148, 518158, 282446, 514939, 506459	178	109	7550	2.72395	0.999948	0.86115	42.6712
GOTERM_BP_DIRECT	GO:0043065~positive regulation of apoptotic process	8	1.92771	0.0442757	787914, 444990, 534216, 537675, 525346, 282337, 507984, 516557	338	133	13824	2.46011	1	0.995163	52.2438
INTERPRO	IPR019187:Cyclin-dependent kinase 2-associated protein	2	0.481928	0.0455368	615387, 517206	388	2	16802	43.3041	1	0.999999	51.5982
INTERPRO	IPR017266:Cyclin-dependent kinase 2-associated protein 2	2	0.481928	0.0455368	615387, 517206	388	2	16802	43.3041	1	0.999999	51.5982
UP_KEYWORDS	Complement pathway	3	0.722892	0.0455606	515440, 280678, 280677	411	15	17808	8.66569	0.999991	0.652002	45.4145
GOTERM_BP_DIRECT	GO:0001525~angiogenesis	8	1.92771	0.0457858	508076, 404191, 282121, 504482, 509963, 505541, 532761, 281477	338	134	13824	2.44176	1	0.99364	53.4605
GOTERM_BP_DIRECT	GO:0006457~protein folding	7	1.68675	0.0468013	407129, 787681, 513277, 509914, 514472, 521540, 513397	338	107	13824	2.67566	1	0.99156	54.2622
UP_SEQ_FEATURE	cross-link:Isoglutamyl cysteine thioester (Cys-Gln)	2	0.481928	0.0476121	280678, 280677	152	2	6267	41.2303	1	1	50.023
INTERPRO	IPR004087:K Homology domain	4	0.963855	0.0494626	613725, 506889, 519028, 618127	388	36	16802	4.81157	1	0.999988	54.6067
GOTERM_CC_DIRECT	GO:0030424~axon	7	1.68675	0.0502332	523325, 511110, 523720, 537922, 281421, 539602, 280678	364	113	15461	2.63121	1	0.757637	50.2777
INTERPRO	IPR017986:WD40-repeat-containing domain	12	2.89157	0.0524025	100138953, 517743, 511036, 540689, 530121, 509913, 100126041, 514870, 517357, 540661, 533611, 512685	388	273	16802	1.90348	1	0.999932	56.744
UP_KEYWORDS	Cytoplasm	51	12.2892	0.0542149	768058, 505242, 513277, 444990, 618020, 281661, 508541, 506889, 538936, 509246, 505809, 533611, 510684, 514141, 613305, 100124502, 507066, 326602, 541250, 615289, 523327, 615240, 777771, 286811, 508591, 539602, 338085, 282375, 507837, 100141021, 532120, 514449, 517994, 100126041, 520580, 534475, 282652, 510029, 510075, 100139910, 522824, 540303, 521540, 404146, 505256, 507340, 504482, 523206, 534…	411	1728	17808	1.27879	0.999999	0.685447	51.5025
UP_SEQ_FEATURE	active site:Proton acceptor	10	2.40964	0.054443	615171, 510440, 282652, 511749, 338068, 540303, 518158, 509246, 520580, 280844	152	202	6267	2.0411	1	0.999997	54.8849
GOTERM_CC_DIRECT	GO:0000151~ubiquitin ligase complex	5	1.20482	0.0548776	530858, 506103, 535831, 517357, 617304	364	61	15461	3.48158	1	0.761344	53.4747
UP_KEYWORDS	Hydrolase	32	7.71084	0.0562027	768058, 280748, 515669, 518169, 515440, 535844, 507640, 100141289, 507188, 281421, 281661, 512977, 528454, 404191, 506243, 505721, 507984, 617215, 521401, 540329, 537087, 613932, 615289, 530795, 404148, 338067, 513458, 540568, 515687, 523206, 777771, 522188	411	998	17808	1.38929	0.999999	0.669759	52.8093
GOTERM_BP_DIRECT	GO:0006958~complement activation, classical pathway	3	0.722892	0.0567788	515440, 280678, 280677	338	16	13824	7.66864	1	0.995515	61.4792
GOTERM_BP_DIRECT	GO:0007269~neurotransmitter secretion	3	0.722892	0.0567788	523325, 528379, 281421	338	16	13824	7.66864	1	0.995515	61.4792
SMART	SM00322:KH	4	0.963855	0.0578679	613725, 506889, 519028, 618127	216	36	8740	4.49588	0.999998	0.998662	53.2288
KEGG_PATHWAY	bta00620:Pyruvate metabolism	4	0.963855	0.0587445	513967, 507817, 506459, 540335	178	38	7550	4.46481	0.999999	0.89878	53.9079
KEGG_PATHWAY	bta00010:Glycolysis / Gluconeogenesis	5	1.20482	0.0597802	513967, 540303, 404148, 518158, 506459	178	63	7550	3.36633	0.999999	0.864522	54.5526
GOTERM_CC_DIRECT	GO:0016605~PML body	5	1.20482	0.060443	538615, 515573, 520580, 522943, 537578	364	63	15461	3.37105	1	0.769983	57.0547
PIR_SUPERFAMILY	PIRSF037709:cyclin-dependent kinase 2-associated protein 2	2	0.481928	0.063414	615387, 517206	50	2	1521	30.42	0.956919	0.956919	46.4865
GOTERM_MF_DIRECT	GO:0003746~translation elongation factor activity	3	0.722892	0.0662468	444990, 617277, 513605	310	18	13095	7.04032	1	0.991848	61.8315
INTERPRO	IPR004088:K Homology domain, type 1	4	0.963855	0.0679784	613725, 506889, 519028, 618127	388	41	16802	4.22479	1	0.999972	66.5822
INTERPRO	IPR001715:Calponin homology domain	5	1.20482	0.0685689	506730, 534583, 519751, 616206, 537578	388	67	16802	3.23165	1	0.999883	66.9103
UP_SEQ_FEATURE	domain:Anaphylatoxin-like	2	0.481928	0.0705667	280678, 280677	152	3	6267	27.4868	1	0.999986	64.672
GOTERM_BP_DIRECT	GO:0050883~musculoskeletal movement, spinal reflex action	2	0.481928	0.0713704	282648, 537043	338	3	13824	27.2663	1	0.998326	70.1329
GOTERM_BP_DIRECT	GO:0006907~pinocytosis	2	0.481928	0.0713704	515687, 281421	338	3	13824	27.2663	1	0.998326	70.1329
KEGG_PATHWAY	bta04922:Glucagon signaling pathway	6	1.44578	0.0718935	786335, 515669, 520388, 404148, 505453, 281879	178	95	7550	2.67889	1	0.879611	61.4999
UP_KEYWORDS	Cilium biogenesis/degradation	4	0.963855	0.0719522	532120, 517994, 534475, 528348	411	42	17808	4.12652	1	0.735019	62.0708
GOTERM_CC_DIRECT	GO:0030057~desmosome	3	0.722892	0.0723023	522380, 281128, 281127	364	19	15461	6.70662	1	0.808159	63.8485
GOTERM_CC_DIRECT	GO:0034451~centriolar satellite	3	0.722892	0.0723023	532120, 538960, 528348	364	19	15461	6.70662	1	0.808159	63.8485
UP_KEYWORDS	Cleavage on pair of basic residues	7	1.68675	0.0734213	281128, 281477, 281127, 281368, 280844, 280678, 280677	411	127	17808	2.38818	1	0.718002	62.843
KEGG_PATHWAY	bta04066:HIF-1 signaling pathway	6	1.44578	0.0744755	508541, 787914, 540303, 617277, 505453, 616115	178	96	7550	2.65098	1	0.85802	62.848
UP_SEQ_FEATURE	domain:SH2	3	0.722892	0.075484	508541, 282375, 509246	152	19	6267	6.51004	1	0.999872	67.2386
UP_KEYWORDS	SH2 domain	4	0.963855	0.076085	508541, 282375, 407210, 509246	411	43	17808	4.03056	1	0.708158	64.2062
GOTERM_BP_DIRECT	GO:0032508~DNA duplex unwinding	3	0.722892	0.0771675	510132, 505721, 522943	338	19	13824	6.4578	1	0.998496	73.0345
KEGG_PATHWAY	bta04918:Thyroid hormone synthesis	5	1.20482	0.0780587	407129, 505740, 515669, 513928, 281879	178	69	7550	3.0736	1	0.841961	64.6467
GOTERM_CC_DIRECT	GO:0033017~sarcoplasmic reticulum membrane	3	0.722892	0.0791273	540568, 617610, 100139857	364	20	15461	6.37129	1	0.817351	67.2923
GOTERM_CC_DIRECT	GO:0005737~cytoplasm	85	20.4819	0.0835758	768058, 786335, 505242, 618127, 513277, 767907, 540689, 618020, 525389, 506578, 506194, 617304, 507804, 508541, 281661, 506889, 511110, 538936, 507869, 404191, 507864, 527539, 538553, 509246, 505453, 282187, 512771, 541215, 616115, 517357, 509241, 533611, 521960, 617215, 516078, 509914, 514141, 613305, 507066, 614679, 516557, 286861, 615289, 523327, 513083, 529251, 535831, 282337, 508591, 539602,…	364	3109	15461	1.16127	1	0.81625	69.3706
KEGG_PATHWAY	bta01230:Biosynthesis of amino acids	5	1.20482	0.0847067	768058, 540303, 404148, 282446, 512771	178	71	7550	2.98702	1	0.83903	67.773
GOTERM_CC_DIRECT	GO:0036064~ciliary basal body	5	1.20482	0.0855371	100138953, 532120, 517994, 525675, 533611	364	71	15461	2.99122	1	0.805891	70.2474
GOTERM_CC_DIRECT	GO:0043005~neuron projection	7	1.68675	0.0859911	280936, 100141021, 511110, 530858, 528379, 507837, 525675	364	130	15461	2.28713	1	0.790217	70.447
UP_KEYWORDS	Protein biosynthesis	6	1.44578	0.0865921	510075, 444990, 514449, 617277, 286811, 100847824	411	102	17808	2.54873	1	0.734628	69.1454
GOTERM_MF_DIRECT	GO:0047485~protein N-terminus binding	3	0.722892	0.0868685	509602, 507984, 522943	310	21	13095	6.03456	1	0.99577	72.1119
UP_KEYWORDS	Thioester bond	2	0.481928	0.0889688	280678, 280677	411	4	17808	21.6642	1	0.724444	70.1716
INTERPRO	IPR001840:Complement C3a/C4a/C5a anaphylatoxin	2	0.481928	0.089005	280678, 280677	388	4	16802	21.6521	1	0.999969	76.5747
INTERPRO	IPR010979:Ribosomal protein S13-like, H2TH	2	0.481928	0.089005	513458, 326602	388	4	16802	21.6521	1	0.999969	76.5747
INTERPRO	IPR009110:Nuclear receptor coactivator, interlocking	2	0.481928	0.089005	525346, 505453	388	4	16802	21.6521	1	0.999969	76.5747
GOTERM_MF_DIRECT	GO:0001103~RNA polymerase II repressing transcription factor binding	2	0.481928	0.0911086	532120, 512977	310	4	13095	21.121	1	0.993443	73.8775
GOTERM_BP_DIRECT	GO:0016042~lipid catabolic process	5	1.20482	0.0912415	280748, 515669, 613932, 506243, 281421	338	70	13824	2.92139	1	0.999316	79.0163
UP_KEYWORDS	Ligase	7	1.68675	0.0920436	506131, 510075, 518991, 530858, 515573, 505809, 100847824	411	135	17808	2.24666	1	0.717882	71.4525
UP_SEQ_FEATURE	zinc finger region:TRAF-type	2	0.481928	0.0929717	512642, 767973	152	4	6267	20.6151	1	0.999866	75.0286
GOTERM_BP_DIRECT	GO:0038108~negative regulation of appetite by leptin-mediated signaling pathway	2	0.481928	0.0940133	532120, 533611	338	4	13824	20.4497	1	0.999177	80.0368
GOTERM_BP_DIRECT	GO:2000427~positive regulation of apoptotic cell clearance	2	0.481928	0.0940133	515440, 280677	338	4	13824	20.4497	1	0.999177	80.0368
GOTERM_BP_DIRECT	GO:0001667~ameboidal-type cell migration	2	0.481928	0.0940133	504482, 504519	338	4	13824	20.4497	1	0.999177	80.0368
KEGG_PATHWAY	bta03010:Ribosome	7	1.68675	0.0945616	787914, 508825, 532842, 506358, 507270, 513128, 326602	178	134	7550	2.21575	1	0.847274	71.941
GOTERM_BP_DIRECT	GO:0040014~regulation of multicellular organism growth	3	0.722892	0.0994532	508541, 522515, 537043	338	22	13824	5.57719	1	0.999207	81.9055
GOTERM_BP_DIRECT	GO:0006891~intra-Golgi vesicle-mediated transport	3	0.722892	0.0994532	100126041, 338085, 616537	338	22	13824	5.57719	1	0.999207	81.9055
GOTERM_BP_DIRECT	GO:0042104~positive regulation of activated T cell proliferation	3	0.722892	0.0994532	282375, 493720, 281489	338	22	13824	5.57719	1	0.999207	81.9055

## Sheet: cluster_down
Annotation Cluster 1	Enrichment Score: 1.678410395424577
Category	Term	Count	%	PValue	Genes	List Total	Pop Hits	Pop Total	Fold Enrichment	Bonferroni	Benjamini	FDR
GOTERM_MF_DIRECT	GO:0098641~cadherin binding involved in cell-cell adhesion	6	1.44578	0.0184717	513277, 539646, 504482, 532723, 507270, 513128	310	65	13095	3.89926	0.99961	0.791926	23.0481
GOTERM_CC_DIRECT	GO:0005913~cell-cell adherens junction	7	1.68675	0.0211805	513277, 539646, 504482, 532723, 507270, 513128, 281128	364	92	15461	3.23181	0.999145	0.635502	25.1909
GOTERM_BP_DIRECT	GO:0098609~cell-cell adhesion	6	1.44578	0.0235682	513277, 539646, 504482, 532723, 507270, 513128	338	67	13824	3.66263	1	0.994187	32.2426
Annotation Cluster 2	Enrichment Score: 1.5376393259461565
Category	Term	Count	%	PValue	Genes	List Total	Pop Hits	Pop Total	Fold Enrichment	Bonferroni	Benjamini	FDR
GOTERM_MF_DIRECT	GO:0004003~ATP-dependent DNA helicase activity	4	0.963855	0.00816296	510132, 505721, 507984, 522943	310	18	13095	9.3871	0.968277	0.683438	10.879
GOTERM_BP_DIRECT	GO:0000723~telomere maintenance	3	0.722892	0.0387079	510132, 505721, 522943	338	13	13824	9.43832	1	0.993978	47.495
GOTERM_BP_DIRECT	GO:0032508~DNA duplex unwinding	3	0.722892	0.0771675	510132, 505721, 522943	338	19	13824	6.4578	1	0.999025	73.0345
Annotation Cluster 3	Enrichment Score: 1.5216423320436534
Category	Term	Count	%	PValue	Genes	List Total	Pop Hits	Pop Total	Fold Enrichment	Bonferroni	Benjamini	FDR
UP_KEYWORDS	Glycolysis	4	0.963855	0.0191387	510616, 540303, 404148, 518158	411	25	17808	6.93255	0.991866	0.551548	22.1885
GOTERM_BP_DIRECT	GO:0006096~glycolytic process	4	0.963855	0.0222031	510616, 540303, 404148, 518158	338	25	13824	6.54391	1	0.997019	30.68
KEGG_PATHWAY	bta01130:Biosynthesis of antibiotics	11	2.6506	0.0228005	768058, 538104, 513967, 521401, 540303, 404148, 518158, 282446, 514939, 506459, 512771	178	206	7550	2.26492	0.994677	0.729885	25.5525
KEGG_PATHWAY	bta01200:Carbon metabolism	7	1.68675	0.042556	507817, 540303, 404148, 518158, 282446, 514939, 506459	178	109	7550	2.72395	0.999948	0.86115	42.6712
KEGG_PATHWAY	bta00010:Glycolysis / Gluconeogenesis	5	1.20482	0.0597802	513967, 540303, 404148, 518158, 506459	178	63	7550	3.36633	0.999999	0.864522	54.5526
Annotation Cluster 4	Enrichment Score: 1.2932397566828613
Category	Term	Count	%	PValue	Genes	List Total	Pop Hits	Pop Total	Fold Enrichment	Bonferroni	Benjamini	FDR
GOTERM_CC_DIRECT	GO:0034464~BBSome	3	0.722892	0.010677	100138953, 532120, 533611	364	7	15461	18.2037	0.971055	0.692962	13.5434
GOTERM_BP_DIRECT	GO:0035058~nonmotile primary cilium assembly	4	0.963855	0.0177169	100138953, 532120, 538960, 533611	338	23	13824	7.11294	1	0.996934	25.3031
GOTERM_CC_DIRECT	GO:0036064~ciliary basal body	5	1.20482	0.0855371	100138953, 532120, 517994, 525675, 533611	364	71	15461	2.99122	1	0.805891	70.2474
GOTERM_BP_DIRECT	GO:0045444~fat cell differentiation	3	0.722892	0.415001	100138953, 532120, 533611	338	58	13824	2.11549	1	0.999992	99.9842
Annotation Cluster 5	Enrichment Score: 1.2369713715885253
Category	Term	Count	%	PValue	Genes	List Total	Pop Hits	Pop Total	Fold Enrichment	Bonferroni	Benjamini	FDR
INTERPRO	IPR004087:K Homology domain	4	0.963855	0.0494626	613725, 506889, 519028, 618127	388	36	16802	4.81157	1	1	54.6067
SMART	SM00322:KH	4	0.963855	0.0578679	613725, 506889, 519028, 618127	216	36	8740	4.49588	0.999998	0.998662	53.2288
INTERPRO	IPR004088:K Homology domain, type 1	4	0.963855	0.0679784	613725, 506889, 519028, 618127	388	41	16802	4.22479	1	0.999996	66.5822
Annotation Cluster 6	Enrichment Score: 1.0795205197428908
Category	Term	Count	%	PValue	Genes	List Total	Pop Hits	Pop Total	Fold Enrichment	Bonferroni	Benjamini	FDR
INTERPRO	IPR000980:SH2 domain	7	1.68675	0.0387496	508541, 282375, 615866, 407210, 509246, 515820, 617777	388	108	16802	2.80675	1	1	45.9527
UP_SEQ_FEATURE	domain:SH2	3	0.722892	0.075484	508541, 282375, 509246	152	19	6267	6.51004	1	1	67.2386
UP_KEYWORDS	SH2 domain	4	0.963855	0.076085	508541, 282375, 407210, 509246	411	43	17808	4.03056	1	0.708158	64.2062
SMART	SM00252:SH2	5	1.20482	0.216022	282375, 407210, 509246, 515820, 617777	216	97	8740	2.08572	1	0.999555	95.5064
Annotation Cluster 7	Enrichment Score: 0.9327760362379389
Category	Term	Count	%	PValue	Genes	List Total	Pop Hits	Pop Total	Fold Enrichment	Bonferroni	Benjamini	FDR
GOTERM_BP_DIRECT	GO:0006457~protein folding	7	1.68675	0.0468013	407129, 787681, 513277, 509914, 514472, 521540, 513397	338	107	13824	2.67566	1	0.99156	54.2622
GOTERM_MF_DIRECT	GO:0051082~unfolded protein binding	4	0.963855	0.113706	513277, 509914, 514472, 521540	310	50	13095	3.37935	1	0.998257	81.6612
UP_KEYWORDS	Chaperone	5	1.20482	0.298973	407129, 509914, 513315, 514472, 521540	411	120	17808	1.80535	1	0.872151	99.0064
Annotation Cluster 8	Enrichment Score: 0.9268736447899928
Category	Term	Count	%	PValue	Genes	List Total	Pop Hits	Pop Total	Fold Enrichment	Bonferroni	Benjamini	FDR
GOTERM_BP_DIRECT	GO:0006289~nucleotide-excision repair	4	0.963855	0.0222031	512977, 513458, 507984, 540564	338	25	13824	6.54391	1	0.997019	30.68
UP_KEYWORDS	DNA repair	6	1.44578	0.150864	512977, 520580, 505721, 507984, 522943, 540564	411	122	17808	2.13091	1	0.856162	88.0345
UP_KEYWORDS	DNA damage	6	1.44578	0.200792	512977, 520580, 505721, 507984, 522943, 540564	411	135	17808	1.92571	1	0.844376	94.5518
GOTERM_BP_DIRECT	GO:0006281~DNA repair	5	1.20482	0.291582	507169, 520580, 505721, 507984, 513606	338	112	13824	1.82587	1	0.999909	99.6396
Annotation Cluster 9	Enrichment Score: 0.8761391232304131
Category	Term	Count	%	PValue	Genes	List Total	Pop Hits	Pop Total	Fold Enrichment	Bonferroni	Benjamini	FDR
SMART	SM00005:DEATH	3	0.722892	0.100911	493720, 616115, 537922	216	22	8740	5.51768	1	0.999619	74.2319
INTERPRO	IPR000488:Death domain	3	0.722892	0.119846	493720, 616115, 537922	388	26	16802	4.99663	1	0.999997	86.2972
INTERPRO	IPR011029:Death-like domain	4	0.963855	0.194547	534251, 493720, 616115, 537922	388	66	16802	2.62449	1	0.999997	96.5557
Annotation Cluster 10	Enrichment Score: 0.8617704881487369
Category	Term	Count	%	PValue	Genes	List Total	Pop Hits	Pop Total	Fold Enrichment	Bonferroni	Benjamini	FDR
INTERPRO	IPR001895:Guanine-nucleotide dissociation stimulator CDC25	3	0.722892	0.135365	785402, 504334, 515820	388	28	16802	4.63973	1	0.999992	89.6123
INTERPRO	IPR023578:Ras guanine nucleotide exchange factor, domain	3	0.722892	0.135365	785402, 504334, 515820	388	28	16802	4.63973	1	0.999992	89.6123
SMART	SM00147:RasGEF	3	0.722892	0.1418	785402, 504334, 515820	216	27	8740	4.49588	1	0.999794	85.7638
Annotation Cluster 11	Enrichment Score: 0.7416185517204189
Category	Term	Count	%	PValue	Genes	List Total	Pop Hits	Pop Total	Fold Enrichment	Bonferroni	Benjamini	FDR
UP_KEYWORDS	RNA-binding	14	3.37349	0.00600807	511555, 522824, 444990, 507640, 507828, 507066, 523474, 326602, 506889, 787681, 534216, 615240, 777771, 523206	411	253	17808	2.39762	0.776986	0.393575	7.52544
UP_KEYWORDS	mRNA processing	6	1.44578	0.184855	511555, 787681, 534216, 615240, 507828, 507066	411	131	17808	1.98451	1	0.84816	92.9599
KEGG_PATHWAY	bta03040:Spliceosome	6	1.44578	0.185371	787681, 615240, 767873, 507828, 507066, 513577	178	129	7550	1.97282	1	0.867806	92.7413
UP_KEYWORDS	mRNA splicing	5	1.20482	0.232944	787681, 534216, 615240, 507828, 507066	411	107	17808	2.02469	1	0.872998	96.8031
INTERPRO	IPR012677:Nucleotide-binding, alpha-beta plait	8	1.92771	0.301279	539785, 508825, 519028, 787681, 534216, 767873, 507828, 507066	388	235	16802	1.47418	1	1	99.6234
SMART	SM00360:RRM	7	1.68675	0.312622	539785, 519028, 787681, 534216, 767873, 507828, 507066	216	187	8740	1.51466	1	0.999904	99.1594
INTERPRO	IPR000504:RNA recognition motif domain	7	1.68675	0.313156	539785, 519028, 787681, 534216, 767873, 507828, 507066	388	199	16802	1.52326	1	0.999999	99.7116
GOTERM_MF_DIRECT	GO:0000166~nucleotide binding	9	2.16867	0.349847	539785, 508825, 519028, 787681, 505740, 534216, 767873, 507828, 507066	310	282	13095	1.34815	1	0.999736	99.7642
UP_KEYWORDS	Spliceosome	3	0.722892	0.427506	787681, 534216, 615240	411	63	17808	2.06326	1	0.927225	99.9284
Annotation Cluster 12	Enrichment Score: 0.7349477372695367
Category	Term	Count	%	PValue	Genes	List Total	Pop Hits	Pop Total	Fold Enrichment	Bonferroni	Benjamini	FDR
UP_KEYWORDS	ATP-binding	26	6.26506	0.123138	615171, 510616, 513493, 514472, 507640, 515573, 505809, 509246, 506103, 520580, 505721, 507984, 100847824, 510029, 510075, 510684, 521540, 523474, 537380, 505787, 506131, 338068, 540568, 523206, 525675, 532964	411	848	17808	1.32847	1	0.821311	81.8411
UP_KEYWORDS	Nucleotide-binding	32	7.71084	0.170544	615171, 510616, 513493, 514472, 507640, 533048, 538936, 505740, 515573, 505809, 506103, 509246, 524142, 520580, 505721, 100847824, 507984, 510029, 510075, 510684, 100139910, 532723, 521540, 537380, 523474, 505787, 506131, 338068, 540568, 523206, 525675, 532964	411	1124	17808	1.23355	1	0.844697	91.1751
GOTERM_MF_DIRECT	GO:0005524~ATP binding	33	7.95181	0.297116	615171, 510616, 513493, 514472, 507640, 533048, 513397, 617325, 519558, 526949, 515573, 505809, 506103, 509246, 541215, 520580, 505721, 100847824, 507984, 510029, 510075, 510684, 521540, 537380, 523474, 505787, 506131, 524075, 338068, 540568, 523206, 525675, 532964	310	1224	13095	1.13888	1	0.999595	99.2946
Annotation Cluster 13	Enrichment Score: 0.6901185315880365
Category	Term	Count	%	PValue	Genes	List Total	Pop Hits	Pop Total	Fold Enrichment	Bonferroni	Benjamini	FDR
UP_KEYWORDS	Lysosome	7	1.68675	0.0344418	616003, 537087, 518169, 515687, 507188, 281421, 504503	411	105	17808	2.88856	0.999838	0.664085	36.5572
KEGG_PATHWAY	bta04142:Lysosome	6	1.44578	0.173478	510539, 537087, 518169, 515687, 507188, 281421	178	126	7550	2.0198	1	0.884962	91.2624
INTERPRO	IPR013781:Glycoside hydrolase, catalytic domain	3	0.722892	0.175825	537087, 515687, 507188	388	33	16802	3.93674	1	0.999996	95.0743
GOTERM_CC_DIRECT	GO:0005764~lysosome	6	1.44578	0.237199	281661, 618505, 518169, 515687, 507188, 281421	364	141	15461	1.80746	1	0.954089	97.4541
INTERPRO	IPR017853:Glycoside hydrolase, superfamily	3	0.722892	0.303496	537087, 515687, 507188	388	48	16802	2.70651	1	0.999999	99.6416
UP_KEYWORDS	Glycosidase	3	0.722892	0.435402	537087, 515687, 507188	411	64	17808	2.03102	1	0.924828	99.9402
GOTERM_BP_DIRECT	GO:0005975~carbohydrate metabolic process	4	0.963855	0.448337	521401, 537087, 515687, 507188	338	101	13824	1.61978	1	0.999995	99.9939
Annotation Cluster 14	Enrichment Score: 0.6240130484871562
Category	Term	Count	%	PValue	Genes	List Total	Pop Hits	Pop Total	Fold Enrichment	Bonferroni	Benjamini	FDR
SMART	SM00165:UBA	3	0.722892	0.150354	100141289, 540564, 525675	216	28	8740	4.33532	1	0.999279	87.4705
INTERPRO	IPR015940:Ubiquitin-associated/translation elongation factor EF1B, N-terminal, eukaryote	3	0.722892	0.252061	100141289, 540564, 525675	388	42	16802	3.09315	1	1	98.9132
INTERPRO	IPR009060:UBA-like	3	0.722892	0.354275	100141289, 540564, 525675	388	54	16802	2.40578	1	1	99.8897
Annotation Cluster 15	Enrichment Score: 0.6089126200407591
Category	Term	Count	%	PValue	Genes	List Total	Pop Hits	Pop Total	Fold Enrichment	Bonferroni	Benjamini	FDR
KEGG_PATHWAY	bta04972:Pancreatic secretion	8	1.92771	0.00714349	280748, 100139105, 528454, 505740, 515669, 540568, 506243, 281879	178	96	7550	3.53464	0.803559	0.803559	8.7638
KEGG_PATHWAY	bta04925:Aldosterone synthesis and secretion	7	1.68675	0.0103159	505740, 506967, 515669, 533048, 281299, 513928, 281879	178	79	7550	3.75836	0.905	0.691779	12.424
KEGG_PATHWAY	bta04918:Thyroid hormone synthesis	5	1.20482	0.0780587	407129, 505740, 515669, 513928, 281879	178	69	7550	3.0736	1	0.841961	64.6467
KEGG_PATHWAY	bta04911:Insulin secretion	5	1.20482	0.125873	505740, 515669, 534591, 513928, 281879	178	82	7550	2.58633	1	0.851718	82.1133
KEGG_PATHWAY	bta04970:Salivary secretion	5	1.20482	0.129975	505740, 515669, 534591, 280844, 281879	178	83	7550	2.55516	1	0.827245	83.1578
KEGG_PATHWAY	bta04730:Long-term depression	4	0.963855	0.160064	515669, 282648, 100139857, 281879	178	59	7550	2.87564	1	0.875566	89.2641
KEGG_PATHWAY	bta04728:Dopaminergic synapse	6	1.44578	0.181374	505740, 515669, 282648, 513928, 537043, 281879	178	128	7550	1.98824	1	0.885053	92.2721
KEGG_PATHWAY	bta04924:Renin secretion	4	0.963855	0.201182	505740, 515669, 533048, 281879	178	66	7550	2.57065	1	0.869915	94.3511
KEGG_PATHWAY	bta04723:Retrograde endocannabinoid signaling	5	1.20482	0.226992	505740, 515669, 282648, 281879, 505290	178	104	7550	2.03922	1	0.857464	96.2891
KEGG_PATHWAY	bta04724:Glutamatergic synapse	5	1.20482	0.273168	526435, 505740, 515669, 282648, 281879	178	113	7550	1.8768	1	0.888613	98.3125
KEGG_PATHWAY	bta04270:Vascular smooth muscle contraction	5	1.20482	0.304802	505740, 515669, 533048, 506243, 281879	178	119	7550	1.78217	1	0.89898	99.045
KEGG_PATHWAY	bta04022:cGMP-PKG signaling pathway	6	1.44578	0.31684	505740, 515669, 533048, 540568, 513928, 281879	178	159	7550	1.60059	1	0.891148	99.2362
KEGG_PATHWAY	bta04713:Circadian entrainment	4	0.963855	0.398359	505740, 515669, 100139857, 281879	178	97	7550	1.7491	1	0.918515	99.8497
KEGG_PATHWAY	bta04915:Estrogen signaling pathway	4	0.963855	0.404703	505740, 515669, 513928, 281879	178	98	7550	1.73125	1	0.913965	99.8688
KEGG_PATHWAY	bta04921:Oxytocin signaling pathway	5	1.20482	0.443335	505740, 515669, 533048, 100139857, 281879	178	145	7550	1.46261	1	0.922479	99.9444
KEGG_PATHWAY	bta04725:Cholinergic synapse	4	0.963855	0.479009	505740, 515669, 282648, 281879	178	110	7550	1.54239	1	0.925478	99.9762
KEGG_PATHWAY	bta04971:Gastric acid secretion	3	0.722892	0.506556	505740, 515669, 281879	178	72	7550	1.76732	1	0.92469	99.9881
KEGG_PATHWAY	bta04726:Serotonergic synapse	4	0.963855	0.514544	505740, 515669, 282648, 281879	178	116	7550	1.46261	1	0.922943	99.9903
KEGG_PATHWAY	bta04611:Platelet activation	4	0.963855	0.576184	505740, 515669, 282187, 281879	178	127	7550	1.33593	1	0.945443	99.9983
KEGG_PATHWAY	bta04912:GnRH signaling pathway	3	0.722892	0.603131	505740, 515669, 281879	178	86	7550	1.47962	1	0.954271	99.9993
KEGG_PATHWAY	bta04540:Gap junction	3	0.722892	0.621886	505740, 515669, 281879	178	89	7550	1.42974	1	0.959221	99.9996
KEGG_PATHWAY	bta04020:Calcium signaling pathway	5	1.20482	0.651949	515669, 282648, 540568, 100139857, 281879	178	189	7550	1.12211	1	0.965759	99.9999
KEGG_PATHWAY	bta04750:Inflammatory mediator regulation of TRP channels	3	0.722892	0.705504	505740, 515669, 281879	178	104	7550	1.22353	1	0.975278	100
KEGG_PATHWAY	bta04261:Adrenergic signaling in cardiomyocytes	3	0.722892	0.833251	505740, 515669, 513928	178	136	7550	0.935641	1	0.991157	100
Annotation Cluster 16	Enrichment Score: 0.6077374191297851
Category	Term	Count	%	PValue	Genes	List Total	Pop Hits	Pop Total	Fold Enrichment	Bonferroni	Benjamini	FDR
GOTERM_BP_DIRECT	GO:0016042~lipid catabolic process	5	1.20482	0.0912415	280748, 515669, 613932, 506243, 281421	338	70	13824	2.92139	1	0.999567	79.0163
UP_KEYWORDS	Lipid metabolism	7	1.68675	0.378186	280748, 282652, 515669, 613932, 537087, 506243, 280677	411	215	17808	1.41069	1	0.914962	99.7905
UP_KEYWORDS	Lipid degradation	3	0.722892	0.435402	280748, 515669, 613932	411	64	17808	2.03102	1	0.924828	99.9402
Annotation Cluster 17	Enrichment Score: 0.6075321616307323
Category	Term	Count	%	PValue	Genes	List Total	Pop Hits	Pop Total	Fold Enrichment	Bonferroni	Benjamini	FDR
KEGG_PATHWAY	bta03010:Ribosome	7	1.68675	0.0945616	787914, 508825, 532842, 506358, 507270, 513128, 326602	178	134	7550	2.21575	1	0.847274	71.941
UP_KEYWORDS	Ribonucleoprotein	9	2.16867	0.147404	787914, 508825, 506889, 532842, 615240, 506358, 507270, 513128, 326602	411	224	17808	1.74088	1	0.862674	87.3859
UP_KEYWORDS	Ribosomal protein	7	1.68675	0.191745	787914, 508825, 532842, 506358, 507270, 513128, 326602	411	168	17808	1.80535	1	0.849394	93.6945
GOTERM_CC_DIRECT	GO:0005762~mitochondrial large ribosomal subunit	3	0.722892	0.276531	508825, 532842, 506358	364	44	15461	2.89604	1	0.952736	98.7579
GOTERM_MF_DIRECT	GO:0003735~structural constituent of ribosome	7	1.68675	0.385631	787914, 613948, 508825, 532842, 506358, 507270, 326602	310	212	13095	1.39478	1	0.999625	99.8936
GOTERM_BP_DIRECT	GO:0006412~translation	4	0.963855	0.794224	787914, 613948, 513128, 326602	338	172	13824	0.951149	1	1	100
Annotation Cluster 18	Enrichment Score: 0.5779918089527288
Category	Term	Count	%	PValue	Genes	List Total	Pop Hits	Pop Total	Fold Enrichment	Bonferroni	Benjamini	FDR
GOTERM_MF_DIRECT	GO:0005089~Rho guanyl-nucleotide exchange factor activity	4	0.963855	0.174097	504334, 782347, 281879, 526631	310	61	13095	2.76996	1	0.999338	93.197
GOTERM_BP_DIRECT	GO:0035023~regulation of Rho protein signal transduction	4	0.963855	0.243286	513493, 782347, 281879, 526631	338	70	13824	2.33711	1	0.99988	98.9428
INTERPRO	IPR000219:Dbl homology (DH) domain	3	0.722892	0.435629	782347, 281879, 526631	388	64	16802	2.02988	1	1	99.9864
Annotation Cluster 19	Enrichment Score: 0.5030288071924425
Category	Term	Count	%	PValue	Genes	List Total	Pop Hits	Pop Total	Fold Enrichment	Bonferroni	Benjamini	FDR
UP_SEQ_FEATURE	glycosylation site:N-linked (GlcNAc...)	30	7.22892	0.144721	280748, 518991, 518169, 515440, 538685, 509963, 507188, 281421, 520625, 507026, 513700, 404191, 281168, 767936, 280936, 537087, 613932, 281368, 280844, 280678, 280677, 281123, 507830, 338068, 338067, 281299, 281128, 281127, 512581, 504503	152	988	6267	1.25193	1	1	89.1684
UP_SEQ_FEATURE	topological domain:Extracellular	17	4.09639	0.226914	280936, 518991, 538745, 281368, 281879, 520625, 507026, 616139, 281123, 338068, 615464, 767936, 281299, 281128, 281127, 512581, 504503	152	540	6267	1.29799	1	1	97.4249
UP_SEQ_FEATURE	topological domain:Cytoplasmic	21	5.06024	0.37173	280936, 518991, 511749, 538745, 618020, 613932, 281368, 281879, 520625, 281123, 616139, 615464, 338068, 404191, 506103, 767936, 281299, 281128, 281127, 512581, 504503	152	760	6267	1.13926	1	1	99.8651
UP_SEQ_FEATURE	transmembrane region	28	6.74699	0.796643	613948, 518991, 538745, 618020, 281879, 520625, 507026, 616139, 526045, 615464, 404191, 767936, 506103, 280936, 614538, 511749, 616003, 613932, 281368, 281123, 507830, 338068, 281299, 281128, 281127, 511554, 512581, 504503	152	1269	6267	0.90973	1	1	100
Annotation Cluster 20	Enrichment Score: 0.4968923908161456
Category	Term	Count	%	PValue	Genes	List Total	Pop Hits	Pop Total	Fold Enrichment	Bonferroni	Benjamini	FDR
GOTERM_BP_DIRECT	GO:0016567~protein ubiquitination	8	1.92771	0.114358	532791, 540134, 518991, 526835, 767973, 533936, 517357, 617304	338	167	13824	1.95925	1	0.999214	86.2198
INTERPRO	IPR017096:Kelch-like protein, gigaxonin	3	0.722892	0.217862	532791, 540134, 533936	388	38	16802	3.41875	1	0.999999	97.8199
UP_KEYWORDS	Kelch repeat	3	0.722892	0.345697	532791, 540134, 533936	411	53	17808	2.45255	1	0.894314	99.5942
PIR_SUPERFAMILY	PIRSF037037:kelch-like protein, gigaxonin type	3	0.722892	0.348285	532791, 540134, 533936	50	38	1521	2.40158	1	1	98.3195
SMART	SM00612:Kelch	3	0.722892	0.384965	532791, 540134, 533936	216	54	8740	2.24794	1	0.999979	99.7963
INTERPRO	IPR011705:BTB/Kelch-associated	3	0.722892	0.387408	532791, 540134, 533936	388	58	16802	2.23987	1	1	99.9514
SMART	SM00875:SM00875	3	0.722892	0.411074	532791, 540134, 533936	216	57	8740	2.12963	1	0.999977	99.8828
INTERPRO	IPR006652:Kelch repeat type 1	3	0.722892	0.411762	532791, 540134, 533936	388	61	16802	2.12971	1	1	99.9742
GOTERM_CC_DIRECT	GO:0031463~Cul3-RING ubiquitin ligase complex	3	0.722892	0.445383	532791, 540134, 533936	364	64	15461	1.99103	1	0.982624	99.9662
Annotation Cluster 21	Enrichment Score: 0.4883667410046105
Category	Term	Count	%	PValue	Genes	List Total	Pop Hits	Pop Total	Fold Enrichment	Bonferroni	Benjamini	FDR
UP_KEYWORDS	Complement pathway	3	0.722892	0.0455606	515440, 280678, 280677	411	15	17808	8.66569	0.999991	0.652002	45.4145
GOTERM_BP_DIRECT	GO:0006958~complement activation, classical pathway	3	0.722892	0.0567788	515440, 280678, 280677	338	16	13824	7.66864	1	0.995515	61.4792
KEGG_PATHWAY	bta05133:Pertussis	4	0.963855	0.26982	515440, 616115, 280678, 280677	178	77	7550	2.20341	1	0.89255	98.2103
UP_KEYWORDS	Immunity	6	1.44578	0.308619	515440, 493720, 509246, 281368, 280678, 280677	411	160	17808	1.62482	1	0.864361	99.17
UP_KEYWORDS	Innate immunity	4	0.963855	0.393301	515440, 493720, 280678, 280677	411	98	17808	1.76851	1	0.916975	99.8478
KEGG_PATHWAY	bta05150:Staphylococcus aureus infection	3	0.722892	0.404414	515440, 280678, 280677	178	59	7550	2.15673	1	0.918148	99.8679
UP_KEYWORDS	Inflammatory response	3	0.722892	0.411543	281368, 280678, 280677	411	61	17808	2.13091	1	0.924896	99.8976
KEGG_PATHWAY	bta04610:Complement and coagulation cascades	3	0.722892	0.52125	515440, 280678, 280677	178	74	7550	1.71956	1	0.923644	99.9919
GOTERM_BP_DIRECT	GO:0006954~inflammatory response	5	1.20482	0.772945	616115, 537922, 281368, 280678, 280677	338	215	13824	0.951149	1	1	100
GOTERM_BP_DIRECT	GO:0045087~innate immune response	5	1.20482	0.807901	515440, 493720, 509246, 616115, 280678	338	227	13824	0.900868	1	1	100
KEGG_PATHWAY	bta05322:Systemic lupus erythematosus	3	0.722892	0.92507	515440, 280678, 280677	178	178	7550	0.714872	1	0.998209	100
Annotation Cluster 22	Enrichment Score: 0.47037211327734296
Category	Term	Count	%	PValue	Genes	List Total	Pop Hits	Pop Total	Fold Enrichment	Bonferroni	Benjamini	FDR
INTERPRO	IPR017986:WD40-repeat-containing domain	12	2.89157	0.0524025	100138953, 517743, 511036, 540689, 530121, 509913, 100126041, 514870, 517357, 540661, 533611, 512685	388	273	16802	1.90348	1	0.999994	56.744
INTERPRO	IPR015943:WD40/YVTN repeat-like-containing domain	10	2.40964	0.277837	100138953, 511036, 540689, 530121, 509913, 100126041, 514870, 517357, 540661, 512685	388	305	16802	1.41981	1	1	99.3705
INTERPRO	IPR001680:WD40 repeat	7	1.68675	0.503283	511036, 509913, 100126041, 514870, 517357, 540661, 512685	388	245	16802	1.23726	1	1	99.9981
INTERPRO	IPR020472:G-protein beta WD-40 repeat	3	0.722892	0.532483	511036, 100126041, 514870	388	77	16802	1.68717	1	1	99.9993
SMART	SM00320:WD40	7	1.68675	0.55082	511036, 509913, 100126041, 514870, 517357, 540661, 512685	216	242	8740	1.17042	1	0.999993	99.9963
INTERPRO	IPR019775:WD40 repeat, conserved site	4	0.963855	0.700644	511036, 100126041, 514870, 540661	388	156	16802	1.11036	1	1	100
Annotation Cluster 23	Enrichment Score: 0.46062746973055435
Category	Term	Count	%	PValue	Genes	List Total	Pop Hits	Pop Total	Fold Enrichment	Bonferroni	Benjamini	FDR
UP_SEQ_FEATURE	calcium-binding region:1	4	0.963855	0.187373	404146, 281661, 618020, 338067	152	62	6267	2.66002	1	1	94.7662
UP_SEQ_FEATURE	domain:EF-hand 1	4	0.963855	0.329864	404146, 281661, 618020, 338067	152	84	6267	1.96335	1	1	99.6624
UP_SEQ_FEATURE	calcium-binding region:2	3	0.722892	0.383941	404146, 281661, 618020	152	55	6267	2.24892	1	1	99.898
UP_SEQ_FEATURE	domain:EF-hand 2	3	0.722892	0.605599	281661, 618020, 338067	152	84	6267	1.47251	1	1	99.9998
Annotation Cluster 24	Enrichment Score: 0.40975298757380635
Category	Term	Count	%	PValue	Genes	List Total	Pop Hits	Pop Total	Fold Enrichment	Bonferroni	Benjamini	FDR
UP_SEQ_FEATURE	active site:Proton acceptor	10	2.40964	0.054443	615171, 510440, 282652, 511749, 338068, 540303, 518158, 509246, 520580, 280844	152	202	6267	2.0411	1	1	54.8849
UP_SEQ_FEATURE	nucleotide phosphate-binding region:ATP	9	2.16867	0.205442	615171, 510029, 338068, 505809, 509246, 520580, 523206, 505721, 507984	152	235	6267	1.57903	1	1	96.1985
UP_SEQ_FEATURE	binding site:ATP	5	1.20482	0.316838	615171, 338068, 514472, 509246, 520580	152	118	6267	1.74705	1	1	99.5562
UP_SEQ_FEATURE	domain:Protein kinase	4	0.963855	0.389413	615171, 338068, 509246, 520580	152	93	6267	1.77334	1	1	99.9101
INTERPRO	IPR011009:Protein kinase-like domain	13	3.13253	0.485618	615171, 526956, 526949, 338068, 507169, 533048, 509246, 541215, 520580, 617325, 519558, 537380, 525675	388	500	16802	1.12591	1	1	99.9968
INTERPRO	IPR017441:Protein kinase, ATP binding site	9	2.16867	0.552314	615171, 526949, 338068, 509246, 541215, 520580, 519558, 537380, 525675	388	348	16802	1.11993	1	1	99.9996
SMART	SM00220:S_TKc	9	2.16867	0.595669	615171, 526949, 338068, 541215, 520580, 617325, 519558, 537380, 525675	216	338	8740	1.07742	1	0.999993	99.999
INTERPRO	IPR000719:Protein kinase, catalytic domain	11	2.6506	0.624166	615171, 526949, 338068, 533048, 509246, 541215, 520580, 617325, 519558, 537380, 525675	388	462	16802	1.03105	1	1	100
INTERPRO	IPR008271:Serine/threonine-protein kinase, active site	7	1.68675	0.66451	615171, 338068, 520580, 617325, 519558, 537380, 525675	388	291	16802	1.04168	1	1	100
UP_KEYWORDS	Serine/threonine-protein kinase	4	0.963855	0.873581	615171, 338068, 520580, 525675	411	214	17808	0.809878	1	0.995053	100
Annotation Cluster 25	Enrichment Score: 0.38318658995649313
Category	Term	Count	%	PValue	Genes	List Total	Pop Hits	Pop Total	Fold Enrichment	Bonferroni	Benjamini	FDR
INTERPRO	IPR013320:Concanavalin A-like lectin/glucanase, subgroup	7	1.68675	0.260982	407129, 538657, 508076, 614804, 100139857, 523793, 525599	388	186	16802	1.62973	1	0.999999	99.0984
INTERPRO	IPR003877:SPla/RYanodine receptor SPRY	3	0.722892	0.458964	538657, 100139857, 525599	388	67	16802	1.93899	1	1	99.993
SMART	SM00449:SPRY	3	0.722892	0.485872	538657, 100139857, 525599	216	66	8740	1.83923	1	0.999995	99.9793
INTERPRO	IPR001870:B30.2/SPRY domain	3	0.722892	0.503897	538657, 100139857, 525599	388	73	16802	1.77962	1	1	99.9982
Annotation Cluster 26	Enrichment Score: 0.350605580453939
Category	Term	Count	%	PValue	Genes	List Total	Pop Hits	Pop Total	Fold Enrichment	Bonferroni	Benjamini	FDR
INTERPRO	IPR008967:p53-like transcription factor, DNA-binding	3	0.722892	0.252061	508541, 282375, 616115	388	42	16802	3.09315	1	1	98.9132
KEGG_PATHWAY	bta05161:Hepatitis B	6	1.44578	0.26659	508541, 282375, 493720, 505453, 616115, 513928	178	148	7550	1.71956	1	0.896726	98.1063
KEGG_PATHWAY	bta05221:Acute myeloid leukemia	3	0.722892	0.379412	508541, 282375, 616115	178	56	7550	2.27227	1	0.919426	99.7765
KEGG_PATHWAY	bta05203:Viral carcinogenesis	7	1.68675	0.470899	508541, 282375, 505453, 513397, 616115, 513928, 280677	178	234	7550	1.26885	1	0.924257	99.971
KEGG_PATHWAY	bta04917:Prolactin signaling pathway	3	0.722892	0.52125	508541, 282375, 616115	178	74	7550	1.71956	1	0.923644	99.9919
KEGG_PATHWAY	bta05162:Measles	4	0.963855	0.642455	508541, 282375, 281489, 616115	178	140	7550	1.21188	1	0.964395	99.9998
KEGG_PATHWAY	bta04630:Jak-STAT signaling pathway	3	0.722892	0.873945	508541, 282375, 505453	178	151	7550	0.842697	1	0.994612	100
Annotation Cluster 27	Enrichment Score: 0.3421594503444639
Category	Term	Count	%	PValue	Genes	List Total	Pop Hits	Pop Total	Fold Enrichment	Bonferroni	Benjamini	FDR
GOTERM_BP_DIRECT	GO:0007264~small GTPase mediated signal transduction	9	2.16867	0.114325	100139105, 613954, 538936, 785402, 532723, 504334, 513397, 515820, 616537	338	199	13824	1.84972	1	0.99944	86.2115
INTERPRO	IPR005225:Small GTP-binding protein domain	5	1.20482	0.460261	100139105, 613954, 538936, 532723, 616537	388	151	16802	1.43391	1	1	99.9932
INTERPRO	IPR001806:Small GTPase superfamily	4	0.963855	0.563113	100139105, 613954, 532723, 616537	388	127	16802	1.36391	1	1	99.9997
GOTERM_MF_DIRECT	GO:0005525~GTP binding	8	1.92771	0.709903	100139105, 538348, 613954, 538936, 532723, 524142, 513605, 616537	310	345	13095	0.979523	1	0.999997	100
UP_SEQ_FEATURE	nucleotide phosphate-binding region:GTP	3	0.722892	0.925254	538936, 532723, 616537	152	173	6267	0.714976	1	1	100
Annotation Cluster 28	Enrichment Score: 0.33997226298318856
Category	Term	Count	%	PValue	Genes	List Total	Pop Hits	Pop Total	Fold Enrichment	Bonferroni	Benjamini	FDR
UP_SEQ_FEATURE	glycosylation site:N-linked (GlcNAc...)	30	7.22892	0.144721	280748, 518991, 518169, 515440, 538685, 509963, 507188, 281421, 520625, 507026, 513700, 404191, 281168, 767936, 280936, 537087, 613932, 281368, 280844, 280678, 280677, 281123, 507830, 338068, 338067, 281299, 281128, 281127, 512581, 504503	152	988	6267	1.25193	1	1	89.1684
UP_KEYWORDS	Glycoprotein	31	7.46988	0.27468	280748, 518169, 515440, 538685, 509963, 507188, 281421, 520625, 507026, 513700, 404191, 282121, 281168, 767936, 282187, 280936, 537087, 613932, 281368, 280844, 280678, 280677, 281123, 507830, 338068, 338067, 281299, 281128, 281127, 512581, 504503	411	1157	17808	1.16092	1	0.864544	98.4537
UP_SEQ_FEATURE	signal peptide	26	6.26506	0.47567	280748, 518991, 515440, 518169, 538685, 509963, 507188, 281500, 281421, 507026, 616139, 513700, 518158, 282121, 281168, 282187, 537087, 280844, 280677, 507830, 281419, 338068, 338067, 281477, 281127, 512581	152	1010	6267	1.06137	1	1	99.9897
UP_KEYWORDS	Secreted	20	4.81928	0.623419	280748, 508076, 515440, 509963, 281368, 280844, 281500, 281421, 280678, 280677, 404146, 509530, 513700, 282121, 518158, 281168, 100126041, 506243, 282187, 281477	411	868	17808	0.998352	1	0.964251	99.9997
UP_SEQ_FEATURE	disulfide bond	18	4.33735	0.80027	280748, 515440, 537087, 518169, 509963, 281368, 280844, 281500, 281421, 280678, 280677, 507026, 281123, 513700, 282121, 281168, 767936, 512581	152	830	6267	0.89415	1	1	100
UP_KEYWORDS	Disulfide bond	29	6.98795	0.96713	280748, 515440, 518169, 509963, 281500, 523793, 281421, 507026, 513700, 528454, 404191, 523720, 282121, 281168, 767936, 506243, 282187, 508076, 537087, 523701, 281368, 280844, 614203, 280678, 280677, 281123, 530795, 534082, 512581	411	1643	17808	0.764775	1	0.99974	100
Annotation Cluster 29	Enrichment Score: 0.29283050051521675
Category	Term	Count	%	PValue	Genes	List Total	Pop Hits	Pop Total	Fold Enrichment	Bonferroni	Benjamini	FDR
GOTERM_CC_DIRECT	GO:0005759~mitochondrial matrix	7	1.68675	0.109394	510440, 614027, 540329, 514472, 505809, 513397, 521960	364	139	15461	2.13904	1	0.852153	79.2086
GOTERM_CC_DIRECT	GO:0005743~mitochondrial inner membrane	8	1.92771	0.527158	513967, 613948, 614027, 514472, 532842, 506358, 505809, 521960	364	292	15461	1.16371	1	0.989716	99.9961
UP_KEYWORDS	Transit peptide	7	1.68675	0.782094	510440, 540329, 514472, 532842, 282446, 506358, 505809	411	333	17808	0.910809	1	0.986585	100
UP_SEQ_FEATURE	transit peptide:Mitochondrion	7	1.68675	0.812701	510440, 540329, 514472, 532842, 282446, 506358, 505809	152	329	6267	0.87724	1	1	100
UP_KEYWORDS	Mitochondrion	11	2.6506	0.936965	613948, 510440, 540329, 514472, 532842, 282446, 506358, 505809, 282710, 511554, 529235	411	653	17808	0.729882	1	0.998974	100
Annotation Cluster 30	Enrichment Score: 0.2766545973815119
Category	Term	Count	%	PValue	Genes	List Total	Pop Hits	Pop Total	Fold Enrichment	Bonferroni	Benjamini	FDR
INTERPRO	IPR001452:Src homology-3 domain	6	1.44578	0.490965	517987, 509246, 507837, 782347, 526631, 532964	388	199	16802	1.30565	1	1	99.9973
SMART	SM00326:SH3	6	1.44578	0.498588	517987, 509246, 507837, 782347, 526631, 532964	216	189	8740	1.28454	1	0.999992	99.9849
UP_KEYWORDS	SH3 domain	4	0.963855	0.604288	509246, 507837, 782347, 532964	411	135	17808	1.28381	1	0.959486	99.9994
Annotation Cluster 31	Enrichment Score: 0.2637927545831511
Category	Term	Count	%	PValue	Genes	List Total	Pop Hits	Pop Total	Fold Enrichment	Bonferroni	Benjamini	FDR
INTERPRO	IPR020894:Cadherin conserved site	3	0.722892	0.474207	281128, 281127, 523793	388	69	16802	1.88279	1	1	99.9955
INTERPRO	IPR002126:Cadherin	3	0.722892	0.511149	281128, 281127, 523793	388	74	16802	1.75557	1	1	99.9986
INTERPRO	IPR015919:Cadherin-like	3	0.722892	0.532483	281128, 281127, 523793	388	77	16802	1.68717	1	1	99.9993
SMART	SM00112:CA	3	0.722892	0.539834	281128, 281127, 523793	216	73	8740	1.66286	1	0.999995	99.995
GOTERM_BP_DIRECT	GO:0007156~homophilic cell adhesion via plasma membrane adhesion molecules	3	0.722892	0.688581	281128, 281127, 523793	338	97	13824	1.26493	1	1	100
Annotation Cluster 32	Enrichment Score: 0.24690961203065004
Category	Term	Count	%	PValue	Genes	List Total	Pop Hits	Pop Total	Fold Enrichment	Bonferroni	Benjamini	FDR
INTERPRO	IPR000210:BTB/POZ-like	5	1.20482	0.538825	532791, 540134, 520456, 100124502, 539528	388	167	16802	1.29653	1	1	99.9994
SMART	SM00225:BTB	5	1.20482	0.567812	532791, 540134, 520456, 100124502, 539528	216	162	8740	1.24886	1	0.999991	99.9977
INTERPRO	IPR011333:BTB/POZ fold	5	1.20482	0.59377	532791, 540134, 520456, 100124502, 539528	388	179	16802	1.20961	1	1	99.9999
Annotation Cluster 33	Enrichment Score: 0.2417719094326734
Category	Term	Count	%	PValue	Genes	List Total	Pop Hits	Pop Total	Fold Enrichment	Bonferroni	Benjamini	FDR
KEGG_PATHWAY	bta05168:Herpes simplex infection	6	1.44578	0.46655	493720, 507828, 505453, 616115, 507066, 280677	178	190	7550	1.33944	1	0.92875	99.9677
KEGG_PATHWAY	bta05142:Chagas disease (American trypanosomiasis)	4	0.963855	0.502838	515669, 493720, 616115, 280677	178	114	7550	1.48827	1	0.925771	99.9869
KEGG_PATHWAY	bta05152:Tuberculosis	4	0.963855	0.80234	493720, 505453, 616115, 280677	178	181	7550	0.937364	1	0.988757	100
Annotation Cluster 34	Enrichment Score: 0.23957240945030428
Category	Term	Count	%	PValue	Genes	List Total	Pop Hits	Pop Total	Fold Enrichment	Bonferroni	Benjamini	FDR
INTERPRO	IPR016186:C-type lectin-like	4	0.963855	0.424483	767907, 508076, 523701, 281368	388	103	16802	1.68171	1	1	99.9816
INTERPRO	IPR016187:C-type lectin fold	4	0.963855	0.472733	767907, 508076, 523701, 281368	388	111	16802	1.56051	1	1	99.9953
INTERPRO	IPR001304:C-type lectin	3	0.722892	0.617388	767907, 523701, 281368	388	90	16802	1.44347	1	1	100
SMART	SM00034:CLECT	3	0.722892	0.641809	767907, 523701, 281368	216	88	8740	1.37942	1	0.999994	99.9998
GOTERM_BP_DIRECT	GO:0007155~cell adhesion	4	0.963855	0.79744	508076, 523701, 519751, 281368	338	173	13824	0.945651	1	1	100
Annotation Cluster 35	Enrichment Score: 0.23655146619665982
Category	Term	Count	%	PValue	Genes	List Total	Pop Hits	Pop Total	Fold Enrichment	Bonferroni	Benjamini	FDR
UP_KEYWORDS	Calcium transport	3	0.722892	0.286217	282648, 540568, 281879	411	46	17808	2.82577	1	0.870972	98.7443
INTERPRO	IPR005821:Ion transport domain	4	0.963855	0.41834	282648, 539528, 100139857, 281879	388	102	16802	1.6982	1	1	99.9783
KEGG_PATHWAY	bta04020:Calcium signaling pathway	5	1.20482	0.651949	515669, 282648, 540568, 100139857, 281879	178	189	7550	1.12211	1	0.965759	99.9999
UP_KEYWORDS	Ion channel	4	0.963855	0.892284	616139, 282648, 539528, 281879	411	224	17808	0.773723	1	0.996523	100
UP_KEYWORDS	Ion transport	6	1.44578	0.942544	616139, 282648, 540568, 282710, 539528, 281879	411	383	17808	0.678775	1	0.999126	100
Annotation Cluster 36	Enrichment Score: 0.23237785730595734
Category	Term	Count	%	PValue	Genes	List Total	Pop Hits	Pop Total	Fold Enrichment	Bonferroni	Benjamini	FDR
UP_KEYWORDS	Activator	6	1.44578	0.430667	508541, 517743, 506967, 282375, 525389, 534607	411	186	17808	1.39769	1	0.925532	99.9333
UP_KEYWORDS	Transcription regulation	16	3.85542	0.505051	613265, 538615, 282375, 525389, 538853, 524491, 534607, 614679, 508541, 517743, 506967, 525346, 520580, 534475, 534170, 507984	411	638	17808	1.08661	1	0.940665	99.9892
UP_KEYWORDS	Transcription	17	4.09639	0.536497	512840, 613265, 538615, 282375, 525389, 538853, 524491, 534607, 614679, 508541, 517743, 506967, 525346, 534475, 520580, 534170, 507984	411	695	17808	1.05983	1	0.947432	99.9954
GOTERM_BP_DIRECT	GO:0006351~transcription, DNA-templated	15	3.61446	0.613388	512840, 613265, 538615, 282375, 525389, 538853, 524491, 534607, 614679, 508541, 517743, 525346, 520580, 534475, 534170	338	603	13824	1.0174	1	1	100
UP_KEYWORDS	DNA-binding	13	3.13253	0.962346	508541, 506889, 512840, 538615, 613265, 506967, 512977, 282375, 524491, 534475, 505721, 534170, 507984	411	806	17808	0.698846	1	0.999666	100
Annotation Cluster 37	Enrichment Score: 0.18859618948922346
Category	Term	Count	%	PValue	Genes	List Total	Pop Hits	Pop Total	Fold Enrichment	Bonferroni	Benjamini	FDR
INTERPRO	IPR020683:Ankyrin repeat-containing domain	6	1.44578	0.539216	100297143, 788407, 516048, 535831, 616115, 100859923	388	210	16802	1.23726	1	1	99.9994
UP_KEYWORDS	ANK repeat	5	1.20482	0.660258	100297143, 788407, 516048, 535831, 616115	411	195	17808	1.11099	1	0.969532	99.9999
INTERPRO	IPR002110:Ankyrin repeat	5	1.20482	0.687477	100297143, 788407, 516048, 535831, 616115	388	202	16802	1.07188	1	1	100
SMART	SM00248:ANK	5	1.20482	0.71925	100297143, 788407, 516048, 535831, 616115	216	197	8740	1.02698	1	0.999999	100
Annotation Cluster 38	Enrichment Score: 0.15841683821540575
Category	Term	Count	%	PValue	Genes	List Total	Pop Hits	Pop Total	Fold Enrichment	Bonferroni	Benjamini	FDR
GOTERM_BP_DIRECT	GO:0051301~cell division	5	1.20482	0.499209	540134, 513277, 512977, 515301, 541250	338	150	13824	1.36331	1	0.999998	99.9987
UP_KEYWORDS	Mitosis	3	0.722892	0.689686	513277, 512977, 541250	411	103	17808	1.26199	1	0.97614	100
UP_KEYWORDS	Cell cycle	5	1.20482	0.782019	538615, 513277, 512977, 522943, 541250	411	231	17808	0.937846	1	0.987221	100
UP_KEYWORDS	Cell division	3	0.722892	0.863338	513277, 512977, 541250	411	150	17808	0.866569	1	0.994574	100
Annotation Cluster 39	Enrichment Score: 0.12238329430854344
Category	Term	Count	%	PValue	Genes	List Total	Pop Hits	Pop Total	Fold Enrichment	Bonferroni	Benjamini	FDR
INTERPRO	IPR017907:Zinc finger, RING-type, conserved site	4	0.963855	0.64345	538657, 615866, 767973, 614210	388	143	16802	1.2113	1	1	100
INTERPRO	IPR001841:Zinc finger, RING-type	6	1.44578	0.696138	538657, 521797, 615866, 282034, 767973, 614210	388	253	16802	1.02698	1	1	100
SMART	SM00184:RING	5	1.20482	0.764459	538657, 615866, 282034, 767973, 614210	216	210	8740	0.963404	1	1	100
INTERPRO	IPR013083:Zinc finger, RING/FYVE/PHD-type	6	1.44578	0.946025	538657, 615866, 282034, 100141289, 767973, 614210	388	387	16802	0.671382	1	1	100
Annotation Cluster 40	Enrichment Score: 0.10354996832305711
Category	Term	Count	%	PValue	Genes	List Total	Pop Hits	Pop Total	Fold Enrichment	Bonferroni	Benjamini	FDR
INTERPRO	IPR001254:Peptidase S1	3	0.722892	0.742186	530795, 515440, 529251	388	114	16802	1.13958	1	1	100
SMART	SM00020:Tryp_SPc	3	0.722892	0.766958	530795, 515440, 529251	216	112	8740	1.08383	1	1	100
INTERPRO	IPR009003:Trypsin-like cysteine/serine peptidase domain	3	0.722892	0.771361	530795, 515440, 529251	388	121	16802	1.07366	1	1	100
GOTERM_MF_DIRECT	GO:0004252~serine-type endopeptidase activity	3	0.722892	0.877521	530795, 515440, 529251	310	152	13095	0.833722	1	1	100
Annotation Cluster 41	Enrichment Score: 0.049010412033465935
Category	Term	Count	%	PValue	Genes	List Total	Pop Hits	Pop Total	Fold Enrichment	Bonferroni	Benjamini	FDR
INTERPRO	IPR013106:Immunoglobulin V-set	4	0.963855	0.64345	507026, 523701, 525599, 789755	388	143	16802	1.2113	1	1	100
INTERPRO	IPR007110:Immunoglobulin-like domain	7	1.68675	0.938209	790068, 523701, 281489, 538875, 504335, 525599, 789755	388	435	16802	0.696848	1	1	100
INTERPRO	IPR013783:Immunoglobulin-like fold	9	2.16867	0.968421	514810, 790068, 523701, 616115, 522188, 538875, 504335, 525599, 789755	388	599	16802	0.650646	1	1	100
INTERPRO	IPR003599:Immunoglobulin subtype	4	0.963855	0.983254	523701, 538875, 525599, 789755	388	331	16802	0.523313	1	1	100
SMART	SM00409:IG	4	0.963855	0.989473	523701, 538875, 525599, 789755	216	331	8740	0.488978	1	1	100
Annotation Cluster 42	Enrichment Score: 0.04675067873655537
Category	Term	Count	%	PValue	Genes	List Total	Pop Hits	Pop Total	Fold Enrichment	Bonferroni	Benjamini	FDR
INTERPRO	IPR013087:Zinc finger C2H2-type/integrase DNA-binding domain	8	1.92771	0.8371	537773, 613265, 538853, 532761, 515997, 534170, 618141, 100144618	388	410	16802	0.844959	1	1	100
INTERPRO	IPR007087:Zinc finger, C2H2	9	2.16867	0.892274	537773, 613265, 534216, 538853, 532761, 515997, 534170, 618141, 100144618	388	499	16802	0.781036	1	1	100
INTERPRO	IPR015880:Zinc finger, C2H2-like	8	1.92771	0.918372	537773, 613265, 538853, 532761, 515997, 534170, 618141, 100144618	388	469	16802	0.738663	1	1	100
SMART	SM00355:ZnF_C2H2	8	1.92771	0.94777	537773, 613265, 538853, 532761, 515997, 534170, 618141, 100144618	216	469	8740	0.6902	1	1	100
Annotation Cluster 43	Enrichment Score: 0.037019077182348974
Category	Term	Count	%	PValue	Genes	List Total	Pop Hits	Pop Total	Fold Enrichment	Bonferroni	Benjamini	FDR
SMART	SM00181:EGF	3	0.722892	0.900735	523720, 523701, 523793	216	156	8740	0.778134	1	1	100
INTERPRO	IPR013032:EGF-like, conserved site	3	0.722892	0.910973	523720, 523701, 523793	388	173	16802	0.750939	1	1	100
INTERPRO	IPR000742:Epidermal growth factor-like domain	3	0.722892	0.943714	523720, 523701, 523793	388	197	16802	0.659454	1	1	100
Annotation Cluster 44	Enrichment Score: 0.010899131414087649
Category	Term	Count	%	PValue	Genes	List Total	Pop Hits	Pop Total	Fold Enrichment	Bonferroni	Benjamini	FDR
INTERPRO	IPR001849:Pleckstrin homology domain	3	0.722892	0.973347	407210, 510748, 537578	388	235	16802	0.552819	1	1	100
SMART	SM00233:PH	3	0.722892	0.974538	407210, 510748, 537578	216	221	8740	0.549271	1	1	100
INTERPRO	IPR011993:Pleckstrin homology-like domain	5	1.20482	0.977769	515669, 407210, 510748, 281879, 537578	388	382	16802	0.566808	1	1	100
Annotation Cluster 45	Enrichment Score: 0.006304213017284773
Category	Term	Count	%	PValue	Genes	List Total	Pop Hits	Pop Total	Fold Enrichment	Bonferroni	Benjamini	FDR
KEGG_PATHWAY	bta04080:Neuroactive ligand-receptor interaction	5	1.20482	0.91659	281299, 767936, 512581, 537043, 517533	178	292	7550	0.726297	1	0.997821	100
UP_KEYWORDS	Receptor	12	2.89157	0.999999	617215, 507830, 338068, 404191, 281299, 767936, 537922, 512581, 281368, 537043, 281879, 523793	411	1461	17808	0.355881	1	1	100
INTERPRO	IPR000276:G protein-coupled receptor, rhodopsin-like	6	1.44578	1	540647, 281299, 767936, 512581, 537043, 517533	388	1051	16802	0.247217	1	1	100
INTERPRO	IPR017452:GPCR, rhodopsin-like, 7TM	6	1.44578	1	540647, 281299, 767936, 512581, 537043, 517533	388	1067	16802	0.24351	1	1	100
UP_KEYWORDS	Transducer	6	1.44578	1	515669, 281299, 767936, 512581, 537043, 523793	411	1099	17808	0.236552	1	1	100
UP_KEYWORDS	G-protein coupled receptor	5	1.20482	1	281299, 767936, 512581, 537043, 523793	411	1053	17808	0.205738	1	1	100
Annotation Cluster 46	Enrichment Score: 1.0048446607884965E-4
Category	Term	Count	%	PValue	Genes	List Total	Pop Hits	Pop Total	Fold Enrichment	Bonferroni	Benjamini	FDR
UP_KEYWORDS	Membrane	103	24.8193	0.999125	444990, 540689, 538745, 528379, 617307, 517059, 520625, 512999, 281661, 526045, 538936, 767936, 282710, 504335, 533611, 614538, 504519, 537922, 100124502, 508465, 616432, 281299, 540568, 522188, 338085, 518991, 767899, 507837, 282648, 539528, 507026, 532120, 616139, 514485, 615464, 512029, 506103, 538104, 513967, 280936, 100139910, 616003, 537087, 532126, 539132, 505787, 281123, 505256, 407129, 5…	411	5650	17808	0.789882	1	1	100
GOTERM_CC_DIRECT	GO:0016021~integral component of membrane	67	16.1446	0.999976	613948, 540647, 538745, 540689, 516807, 534591, 614775, 282233, 517059, 520625, 512999, 526045, 404191, 504335, 512289, 614538, 521797, 511749, 613932, 616432, 281299, 515687, 522188, 522515, 517533, 506692, 518991, 767899, 533048, 788087, 539528, 523793, 281879, 783019, 514485, 523460, 505740, 615464, 788015, 506103, 281489, 280936, 513967, 538104, 506607, 616003, 617714, 512474, 532126, 539132,…	364	4185	15461	0.68001	1	1	100
UP_KEYWORDS	Transmembrane helix	79	19.0361	0.999985	613948, 540647, 540689, 538745, 516807, 534591, 617307, 614775, 282233, 517059, 520625, 512999, 526045, 404191, 767936, 516747, 504335, 100139857, 512289, 614538, 511749, 521797, 613932, 514514, 537922, 508465, 616432, 281299, 540568, 515687, 522188, 522515, 517533, 506692, 518991, 533048, 767899, 788087, 282648, 539528, 523793, 281879, 616139, 507026, 783019, 514485, 505740, 615464, 788015, 5061…	411	4935	17808	0.693607	1	1	100
UP_KEYWORDS	Transmembrane	79	19.0361	0.999988	613948, 540647, 540689, 538745, 516807, 534591, 617307, 614775, 282233, 517059, 520625, 512999, 526045, 404191, 767936, 516747, 504335, 100139857, 512289, 614538, 511749, 521797, 613932, 514514, 537922, 508465, 616432, 281299, 540568, 515687, 522188, 522515, 517533, 506692, 518991, 533048, 767899, 788087, 282648, 539528, 523793, 281879, 616139, 507026, 783019, 514485, 505740, 615464, 788015, 5061…	411	4953	17808	0.691086	1	1	100

## Sheet: chart_all
Category	Term	Count	%	PValue	Genes	List Total	Pop Hits	Pop Total	Fold Enrichment	Bonferroni	Benjamini	FDR
UP_KEYWORDS	Coiled coil	94	18.9516	0.000102593	539785, 513277, 515669, 540689, 528523, 509963, 528870, 538685, 522380, 616487, 527084, 614775, 513998, 506194, 516258, 787914, 508541, 511110, 507869, 507864, 527539, 538553, 524142, 505453, 506434, 513078, 513928, 100139857, 533611, 526435, 767930, 100138953, 518494, 538595, 524491, 534624, 281918, 614679, 281342, 541250, 508607, 530962, 519774, 777770, 286811, 613313, 515112, 539602, 508592, 5…	491	2319	17808	1.47015	0.0267225	0.0267225	0.134337
UP_KEYWORDS	Phosphoprotein	103	20.7661	0.000104351	539784, 538745, 618020, 525042, 281661, 511110, 540254, 613381, 504519, 508904, 493720, 286811, 508591, 539602, 540564, 338085, 615171, 506656, 507837, 281500, 616139, 512977, 512029, 282446, 534475, 513267, 507984, 280936, 510075, 100139910, 613265, 540303, 512642, 618485, 507828, 521540, 511970, 280844, 404146, 505256, 338068, 404148, 338067, 281128, 281127, 529235, 786335, 505242, 513277, 5144…	491	2603	17808	1.43515	0.0271742	0.0136807	0.136638
GOTERM_MF_DIRECT	GO:0044822~poly(A) RNA binding	41	8.26613	0.000652846	506730, 506656, 537453, 533360, 514472, 282689, 507640, 506358, 513577, 787914, 539807, 507804, 613725, 537675, 514449, 515573, 538553, 782848, 281039, 510132, 509913, 507828, 521540, 507066, 326602, 532701, 534704, 517743, 407129, 787681, 281419, 532842, 513083, 282034, 538525, 507270, 513128, 523206, 514870, 507116, 539602	367	840	13095	1.74158	0.272426	0.272426	0.932573
SMART	SM00314:RA	6	1.20968	0.00159315	785402, 513493, 407210, 505541, 504334, 282337	256	30	8740	6.82812	0.3266	0.3266	2.04743
GOTERM_CC_DIRECT	GO:0005829~cytosol	46	9.27419	0.0016483	515563, 510616, 533360, 540689, 282689, 515890, 507837, 513397, 281421, 281661, 525042, 538348, 613725, 512029, 530858, 520388, 541215, 512771, 616115, 497204, 517656, 614554, 282652, 281039, 522824, 510684, 509914, 515556, 100124502, 534607, 326602, 522866, 541250, 616537, 512685, 404146, 531699, 523325, 615289, 507340, 404148, 615240, 539646, 286811, 537312, 529235	432	1025	15461	1.60616	0.452353	0.452353	2.2447
GOTERM_CC_DIRECT	GO:0005730~nucleolus	31	6.25	0.00169088	511555, 615135, 525389, 507640, 616487, 540661, 281879, 787914, 538936, 538657, 512977, 537675, 540254, 517656, 506018, 538615, 509072, 618485, 613381, 509913, 767873, 613305, 523474, 522943, 534251, 517743, 615289, 513128, 286811, 534170, 539602	432	605	15461	1.83383	0.460814	0.265707	2.30207
GOTERM_BP_DIRECT	GO:0006956~complement activation	4	0.806452	0.00173556	515440, 522347, 527391, 280677	398	9	13824	15.4372	0.92246	0.92246	2.83855
GOTERM_CC_DIRECT	GO:0070062~extracellular exosome	83	16.7339	0.00191972	539784, 505242, 618127, 533360, 517987, 540689, 528379, 514472, 535844, 615866, 507188, 281421, 520625, 507804, 525042, 281661, 100139105, 538348, 404191, 538553, 509246, 506911, 513078, 100139857, 509241, 534482, 614538, 281386, 613932, 504519, 532723, 524491, 507066, 282882, 326602, 281342, 280958, 280677, 615289, 281614, 281419, 534082, 513128, 515687, 540815, 515440, 282689, 515890, 507837, 5…	432	2162	15461	1.37397	0.504096	0.208473	2.60982
GOTERM_MF_DIRECT	GO:0003684~damaged DNA binding	7	1.41129	0.00208372	510132, 512977, 513458, 505453, 522943, 513606, 540564	367	48	13095	5.20351	0.637898	0.398251	2.94831
GOTERM_CC_DIRECT	GO:0005654~nucleoplasm	55	11.0887	0.00234585	512840, 515669, 514472, 523714, 508541, 507804, 782214, 524142, 540254, 616115, 767930, 509072, 510684, 527349, 767873, 538796, 507066, 614679, 534251, 513083, 515218, 524314, 536073, 338085, 511555, 614893, 615135, 511036, 282375, 516048, 515997, 281879, 506359, 512977, 534216, 514449, 515301, 506459, 513606, 517656, 532791, 510029, 613265, 510132, 618485, 511970, 281368, 528109, 512685, 404181,…	432	1310	15461	1.50261	0.575668	0.192902	3.18049
INTERPRO	IPR000159:Ras-association	6	1.20968	0.00284293	785402, 513493, 407210, 505541, 504334, 282337	462	36	16802	6.06133	0.947781	0.947781	4.41839
UP_KEYWORDS	Cell projection	15	3.02419	0.00333813	505242, 507837, 281342, 281939, 280678, 532120, 100141021, 511110, 523327, 281614, 512029, 504482, 517994, 539602, 533611	491	221	17808	2.46169	0.586353	0.254908	4.28645
GOTERM_BP_DIRECT	GO:0006096~glycolytic process	5	1.00806	0.00525348	510616, 287019, 540303, 404148, 518158	398	25	13824	6.94673	0.999571	0.979282	8.36153
GOTERM_CC_DIRECT	GO:0016020~membrane	39	7.8629	0.00727952	539784, 786335, 505242, 618127, 513493, 508353, 282689, 337889, 507837, 282648, 527084, 540664, 537578, 787914, 514449, 282121, 518158, 538553, 520580, 513078, 533611, 100138953, 281039, 510029, 510132, 515556, 534624, 326602, 523474, 505290, 506131, 281419, 281174, 618232, 404148, 539646, 507270, 513128, 536073	432	902	15461	1.54743	0.930522	0.413363	9.56581
GOTERM_BP_DIRECT	GO:0032958~inositol phosphate biosynthetic process	3	0.604839	0.00776691	615135, 510684, 521960	398	5	13824	20.8402	0.99999	0.9782	12.1253
GOTERM_BP_DIRECT	GO:0050885~neuromuscular process controlling balance	6	1.20968	0.00905877	505740, 515556, 282648, 522188, 781073, 522943	398	45	13824	4.63116	0.999998	0.964874	14.0029
GOTERM_MF_DIRECT	GO:0098641~cadherin binding involved in cell-cell adhesion	7	1.41129	0.00944577	513277, 282689, 539646, 504482, 532723, 507270, 513128	367	65	13095	3.84259	0.990166	0.785758	12.73
UP_KEYWORDS	RNA-binding	15	3.02419	0.0106911	511555, 522824, 444990, 507640, 507828, 507066, 523474, 326602, 506889, 787681, 534216, 615240, 540254, 777771, 523206	491	253	17808	2.15033	0.941437	0.508068	13.1365
GOTERM_BP_DIRECT	GO:0040018~positive regulation of multicellular organism growth	5	1.00806	0.0114183	532120, 281419, 282375, 533611, 537578	398	31	13824	5.6022	1	0.965982	17.3351
GOTERM_BP_DIRECT	GO:0035195~gene silencing by miRNA	3	0.604839	0.01143	505059, 286811, 523206	398	6	13824	17.3668	1	0.940412	17.3514
GOTERM_BP_DIRECT	GO:0072673~lamellipodium morphogenesis	3	0.604839	0.01143	540815, 512029, 504482	398	6	13824	17.3668	1	0.940412	17.3514
GOTERM_BP_DIRECT	GO:0098609~cell-cell adhesion	7	1.41129	0.0123486	513277, 282689, 539646, 504482, 532723, 507270, 513128	398	67	13824	3.62889	1	0.926678	18.6153
GOTERM_MF_DIRECT	GO:0004003~ATP-dependent DNA helicase activity	4	0.806452	0.0129358	510132, 505721, 507984, 522943	367	18	13095	7.92916	0.998237	0.795095	17.0392
GOTERM_CC_DIRECT	GO:0005913~cell-cell adherens junction	8	1.6129	0.0143301	513277, 282689, 539646, 504482, 532723, 507270, 513128, 281128	432	92	15461	3.11212	0.994848	0.584409	18.0154
GOTERM_CC_DIRECT	GO:0034464~BBSome	3	0.604839	0.0148374	100138953, 532120, 533611	432	7	15461	15.3383	0.99573	0.541347	18.5942
GOTERM_CC_DIRECT	GO:0031209~SCAR complex	3	0.604839	0.0148374	100141021, 540815, 504482	432	7	15461	15.3383	0.99573	0.541347	18.5942
KEGG_PATHWAY	bta04922:Glucagon signaling pathway	8	1.6129	0.0163225	786335, 515669, 520388, 404148, 506812, 505453, 790867, 281879	211	95	7550	3.01322	0.981054	0.981054	19.1489
KEGG_PATHWAY	bta04972:Pancreatic secretion	8	1.6129	0.0172047	280748, 100139105, 528454, 505740, 515669, 540568, 506243, 281879	211	96	7550	2.98183	0.984738	0.876461	20.0804
GOTERM_MF_DIRECT	GO:0005509~calcium ion binding	26	5.24194	0.017809	506730, 534482, 533360, 515669, 522347, 282689, 615866, 523701, 617610, 790867, 280844, 523793, 281879, 404146, 281661, 538348, 407129, 338067, 784716, 514521, 506243, 540568, 281128, 281127, 533203, 100139857	367	571	13095	1.62471	0.999842	0.826265	22.7257
GOTERM_BP_DIRECT	GO:0042384~cilium assembly	8	1.6129	0.0194532	100138953, 535844, 541215, 534475, 513998, 528348, 523793, 533611	398	95	13824	2.92494	1	0.973074	27.7951
GOTERM_MF_DIRECT	GO:0047485~protein N-terminus binding	4	0.806452	0.0198243	509602, 507984, 280958, 522943	367	21	13095	6.79642	0.999942	0.803135	24.9697
KEGG_PATHWAY	bta04925:Aldosterone synthesis and secretion	7	1.41129	0.0222669	505740, 506967, 515669, 533048, 281299, 513928, 281879	211	79	7550	3.17056	0.995604	0.836181	25.2372
UP_KEYWORDS	Calcium	20	4.03226	0.0228526	533360, 282689, 522347, 282648, 522866, 281342, 280844, 281879, 523793, 281661, 404146, 784716, 338067, 506243, 540568, 282187, 281128, 281477, 281127, 533203	491	418	17808	1.73535	0.997764	0.704952	26.1323
UP_KEYWORDS	Lyase	8	1.6129	0.0236106	511749, 505740, 540303, 533048, 528582, 512771, 522515, 540335	491	103	17808	2.817	0.998178	0.650526	26.8796
UP_KEYWORDS	Cleavage on pair of basic residues	9	1.81452	0.0242174	280880, 281128, 281477, 281127, 281368, 280844, 280958, 280678, 280677	491	127	17808	2.57023	0.998454	0.603304	27.4728
GOTERM_CC_DIRECT	GO:0005793~endoplasmic reticulum-Golgi intermediate compartment	5	1.00806	0.0246829	514485, 613954, 404191, 539132, 614775	432	40	15461	4.47367	0.999891	0.680273	29.1036
GOTERM_BP_DIRECT	GO:0035058~nonmotile primary cilium assembly	4	0.806452	0.0271878	100138953, 532120, 538960, 533611	398	23	13824	6.04064	1	0.988983	36.6785
GOTERM_BP_DIRECT	GO:0050821~protein stabilization	8	1.6129	0.0274814	523325, 532845, 281419, 530858, 100141289, 521540, 282337, 516557	398	102	13824	2.72421	1	0.983459	36.9946
GOTERM_CC_DIRECT	GO:0005814~centriole	7	1.41129	0.0282848	532120, 530962, 529230, 517994, 541215, 513998, 528348	432	83	15461	3.01838	0.999972	0.687653	32.6232
GOTERM_BP_DIRECT	GO:0007264~small GTPase mediated signal transduction	12	2.41935	0.0289798	100139105, 613954, 513994, 538936, 785402, 532723, 506911, 504334, 513397, 537312, 515820, 616537	398	199	13824	2.09449	1	0.980461	38.5847
GOTERM_CC_DIRECT	GO:0043005~neuron projection	9	1.81452	0.0291719	280936, 404181, 100141021, 540815, 511110, 530858, 528379, 507837, 525675	432	130	15461	2.47772	0.99998	0.660613	33.4648
UP_KEYWORDS	Glycolysis	4	0.806452	0.0303932	510616, 540303, 404148, 518158	491	25	17808	5.80301	0.999711	0.638876	33.2621
GOTERM_MF_DIRECT	GO:0003723~RNA binding	14	2.82258	0.0312165	511555, 508825, 510075, 506018, 537453, 787681, 615240, 338067, 507640, 613305, 507828, 513128, 777771, 523474	367	260	13095	1.9213	1	0.889903	36.5555
UP_KEYWORDS	Sulfation	4	0.806452	0.0336748	404191, 281168, 281477, 280678	491	26	17808	5.57982	0.999882	0.633885	36.1616
GOTERM_BP_DIRECT	GO:0006289~nucleotide-excision repair	4	0.806452	0.0338597	512977, 513458, 507984, 540564	398	25	13824	5.55739	1	0.98538	43.5057
INTERPRO	IPR001715:Calponin homology domain	6	1.20968	0.0366541	506730, 534583, 528870, 519751, 616206, 537578	462	67	16802	3.25683	1	1	44.7187
INTERPRO	IPR014716:Fibrinogen, alpha/beta/gamma chain, C-terminal globular, subdomain 1	4	0.806452	0.0368588	508016, 618581, 509963, 540664	462	27	16802	5.38785	1	0.999998	44.9049
GOTERM_BP_DIRECT	GO:0035176~social behavior	4	0.806452	0.0374844	532120, 523325, 508577, 533360	398	26	13824	5.34364	1	0.986779	46.9186
GOTERM_BP_DIRECT	GO:0043065~positive regulation of apoptotic process	9	1.81452	0.0379632	787914, 444990, 534216, 537675, 539020, 525346, 282337, 507984, 516557	398	133	13824	2.3504	1	0.982911	47.3546
UP_SEQ_FEATURE	active site:Proton acceptor	12	2.41935	0.0385738	615171, 404181, 525042, 510440, 282652, 511749, 338068, 540303, 518158, 509246, 520580, 280844	188	202	6267	1.9803	1	1	43.6849
GOTERM_CC_DIRECT	GO:0030424~axon	8	1.6129	0.0387301	523325, 511110, 281614, 523720, 537922, 281421, 539602, 280678	432	113	15461	2.53376	0.999999	0.730364	41.9348
GOTERM_BP_DIRECT	GO:0001525~angiogenesis	9	1.81452	0.039409	508076, 404191, 282689, 282121, 504482, 509963, 505541, 532761, 281477	398	134	13824	2.33286	1	0.98066	48.6509
UP_KEYWORDS	Hydrolase	38	7.66129	0.0400562	768058, 280748, 515563, 515669, 518169, 515440, 535844, 507640, 100141289, 507188, 790867, 281421, 281661, 512977, 528454, 404191, 506243, 505721, 507984, 617215, 521401, 287019, 540329, 613932, 537087, 522347, 522866, 615289, 530795, 404148, 338067, 513458, 540568, 515687, 523206, 777771, 522188, 533203	491	998	17808	1.38098	0.999979	0.660148	41.4698
INTERPRO	IPR023578:Ras guanine nucleotide exchange factor, domain	4	0.806452	0.0404666	785402, 504334, 537312, 515820	462	28	16802	5.19542	1	0.999978	48.091
INTERPRO	IPR000073:Alpha/beta hydrolase fold-1	4	0.806452	0.0404666	768058, 515563, 615289, 505290	462	28	16802	5.19542	1	0.999978	48.091
INTERPRO	IPR001895:Guanine-nucleotide dissociation stimulator CDC25	4	0.806452	0.0404666	785402, 504334, 537312, 515820	462	28	16802	5.19542	1	0.999978	48.091
GOTERM_CC_DIRECT	GO:0008540~proteasome regulatory particle, base subcomplex	3	0.604839	0.0425405	539784, 510029, 513315	432	12	15461	8.94734	1	0.73347	45.0234
SMART	SM00147:RasGEF	4	0.806452	0.0428652	785402, 504334, 537312, 515820	256	27	8740	5.05787	0.999981	0.995628	43.3585
INTERPRO	IPR002181:Fibrinogen, alpha/beta/gamma chain, C-terminal globular domain	4	0.806452	0.0442458	508016, 618581, 509963, 540664	462	29	16802	5.01627	1	0.999916	51.2428
GOTERM_BP_DIRECT	GO:0007191~adenylate cyclase-activating dopamine receptor signaling pathway	3	0.604839	0.0448916	505242, 505740, 537043	398	12	13824	8.68342	1	0.985383	53.2993
KEGG_PATHWAY	bta04141:Protein processing in endoplasmic reticulum	10	2.01613	0.0458492	281661, 614538, 407129, 530858, 338067, 506103, 537380, 513928, 508465, 540564	211	169	7550	2.11728	0.999988	0.940854	45.4577
UP_KEYWORDS	Acetylation	55	11.0887	0.0487308	539784, 505242, 533360, 513277, 444990, 514472, 618020, 508541, 787914, 539591, 509246, 505809, 512771, 282710, 614538, 509914, 613381, 504519, 532723, 507066, 523474, 326602, 510440, 286861, 281419, 615240, 507270, 513128, 539602, 510678, 282689, 512977, 512029, 514449, 282446, 520580, 513267, 282206, 510029, 281039, 510075, 100139910, 613265, 287019, 540303, 287012, 512642, 507828, 521540, 5119…	491	1564	17808	1.27544	0.999998	0.698503	48.0332
KEGG_PATHWAY	bta04122:Sulfur relay system	3	0.604839	0.0490973	517656, 522824, 515890	211	13	7550	8.25738	0.999995	0.91166	47.8078
KEGG_PATHWAY	bta04066:HIF-1 signaling pathway	7	1.41129	0.0506502	404181, 508541, 787914, 540303, 617277, 505453, 616115	211	96	7550	2.6091	0.999996	0.876038	48.898
GOTERM_BP_DIRECT	GO:0000723~telomere maintenance	3	0.604839	0.0520674	510132, 505721, 522943	398	13	13824	8.01546	1	0.990246	58.7875
GOTERM_CC_DIRECT	GO:0098793~presynapse	5	1.00806	0.0533178	523325, 540545, 530858, 528379, 282648	432	51	15461	3.50876	1	0.785273	52.9543
GOTERM_BP_DIRECT	GO:0006890~retrograde vesicle-mediated transport, Golgi to ER	4	0.806452	0.0538567	532845, 100126041, 338085, 616537	398	30	13824	4.63116	1	0.98919	60.0584
INTERPRO	IPR019187:Cyclin-dependent kinase 2-associated protein	2	0.403226	0.0541232	615387, 517206	462	2	16802	36.368	1	0.999933	58.6548
INTERPRO	IPR017266:Cyclin-dependent kinase 2-associated protein 2	2	0.403226	0.0541232	615387, 517206	462	2	16802	36.368	1	0.999933	58.6548
KEGG_PATHWAY	bta04610:Complement and coagulation cascades	6	1.20968	0.0545449	515440, 522347, 527391, 280958, 280678, 280677	211	74	7550	2.90124	0.999999	0.855006	51.5406
INTERPRO	IPR019804:Ras guanine-nucleotide exchange factor, conserved site	3	0.604839	0.0549831	785402, 504334, 537312	462	14	16802	7.79314	1	0.99977	59.2474
GOTERM_CC_DIRECT	GO:0032040~small-subunit processome	4	0.806452	0.0587884	537675, 509913, 514870, 539602	432	32	15461	4.47367	1	0.793942	56.5608
UP_SEQ_FEATURE	cross-link:Isoglutamyl cysteine thioester (Cys-Gln)	2	0.403226	0.0587919	280678, 280677	188	2	6267	33.3351	1	1	58.7057
KEGG_PATHWAY	bta01130:Biosynthesis of antibiotics	11	2.21774	0.0611055	768058, 538104, 513967, 521401, 540303, 404148, 518158, 282446, 514939, 506459, 512771	211	206	7550	1.91069	1	0.850349	55.7087
GOTERM_BP_DIRECT	GO:0032436~positive regulation of proteasomal ubiquitin-dependent protein catabolic process	5	1.00806	0.061707	100138953, 523325, 530858, 614210, 538465	398	52	13824	3.33978	1	0.992806	65.2111
INTERPRO	IPR022812:Dynamin	3	0.604839	0.0623187	538348, 506315, 524142	462	15	16802	7.27359	1	0.999761	63.9889
INTERPRO	IPR012675:Beta-grasp domain	3	0.604839	0.0623187	531699, 510075, 515890	462	15	16802	7.27359	1	0.999761	63.9889
UP_KEYWORDS	Complement pathway	3	0.604839	0.0626383	515440, 280678, 280677	491	15	17808	7.25377	1	0.759032	57.153
GOTERM_MF_DIRECT	GO:0051287~NAD binding	4	0.806452	0.0637438	531699, 525042, 507817, 282446	367	33	13095	4.32499	1	0.981859	61.1315
UP_KEYWORDS	Cytoplasm	59	11.8952	0.0647633	768058, 505242, 513277, 444990, 618020, 281661, 508541, 525042, 506889, 538936, 509246, 505809, 533611, 510684, 514141, 613305, 538595, 507066, 281918, 100124502, 326602, 541250, 615289, 523327, 615240, 777770, 777771, 286811, 508591, 539602, 338085, 614893, 282375, 515890, 507837, 100141021, 532120, 514449, 517994, 100126041, 534475, 520580, 282652, 510029, 510075, 100139910, 522824, 540303, 521…	491	1728	17808	1.23835	1	0.743266	58.4084
UP_KEYWORDS	Guanine-nucleotide releasing factor	4	0.806452	0.0660817	785402, 515556, 539646, 504334	491	34	17808	4.26692	1	0.724507	59.17
GOTERM_BP_DIRECT	GO:0035855~megakaryocyte development	3	0.604839	0.0675185	540815, 504482, 617577	398	15	13824	6.94673	1	0.994172	68.6158
UP_KEYWORDS	Lysosome	7	1.41129	0.0698261	616003, 537087, 518169, 515687, 507188, 281421, 504503	491	105	17808	2.41792	1	0.720276	61.2636
GOTERM_MF_DIRECT	GO:0019901~protein kinase binding	6	1.20968	0.0730486	280936, 508541, 786335, 287019, 507340, 514472	367	80	13095	2.67609	1	0.983503	66.3206
INTERPRO	IPR017986:WD40-repeat-containing domain	13	2.62097	0.0744267	100138953, 522049, 517743, 511036, 540689, 530121, 509913, 100126041, 517357, 514870, 540661, 512685, 533611	462	273	16802	1.73181	1	0.999865	70.7016
INTERPRO	IPR004087:K Homology domain	4	0.806452	0.0752734	613725, 506889, 519028, 618127	462	36	16802	4.04089	1	0.999701	71.1242
GOTERM_BP_DIRECT	GO:0007269~neurotransmitter secretion	3	0.604839	0.0757404	523325, 528379, 281421	398	16	13824	6.51256	1	0.995998	72.9012
GOTERM_BP_DIRECT	GO:0006958~complement activation, classical pathway	3	0.604839	0.0757404	515440, 280678, 280677	398	16	13824	6.51256	1	0.995998	72.9012
PIR_SUPERFAMILY	PIRSF037709:cyclin-dependent kinase 2-associated protein 2	2	0.403226	0.0761004	615387, 517206	60	2	1521	25.35	0.989855	0.989855	54.5023
INTERPRO	IPR000980:SH2 domain	7	1.41129	0.0768175	508541, 282375, 615866, 407210, 509246, 515820, 617777	462	108	16802	2.35718	1	0.999466	71.8801
UP_KEYWORDS	Actin-binding	8	1.6129	0.0770932	506730, 100141021, 534583, 504482, 504519, 513267, 537578, 532964	491	134	17808	2.1653	1	0.733863	65.0466
KEGG_PATHWAY	bta04911:Insulin secretion	6	1.20968	0.0776313	505740, 515669, 534591, 513928, 537312, 281879	211	82	7550	2.61819	1	0.885126	64.7866
UP_KEYWORDS	Laminin EGF-like domain	3	0.604839	0.0782858	520167, 523720, 523793	491	17	17808	6.40038	1	0.718031	65.6338
KEGG_PATHWAY	bta04730:Long-term depression	5	1.00806	0.0810512	515669, 282648, 522866, 100139857, 281879	211	59	7550	3.03237	1	0.869587	66.4362
GOTERM_CC_DIRECT	GO:0045202~synapse	7	1.41129	0.0814254	404181, 280748, 100141021, 407129, 520167, 528379, 280678	432	108	15461	2.31968	1	0.873395	68.9274
KEGG_PATHWAY	bta01200:Carbon metabolism	7	1.41129	0.0828133	507817, 540303, 404148, 518158, 282446, 514939, 506459	211	109	7550	2.29793	1	0.849519	67.2581
GOTERM_BP_DIRECT	GO:0050883~musculoskeletal movement, spinal reflex action	2	0.403226	0.0837099	282648, 537043	398	3	13824	23.1558	1	0.997118	76.5252
GOTERM_BP_DIRECT	GO:0006907~pinocytosis	2	0.403226	0.0837099	515687, 281421	398	3	13824	23.1558	1	0.997118	76.5252
GOTERM_BP_DIRECT	GO:0090074~negative regulation of protein homodimerization activity	2	0.403226	0.0837099	540689, 282882	398	3	13824	23.1558	1	0.997118	76.5252
GOTERM_BP_DIRECT	GO:0007599~hemostasis	2	0.403226	0.0837099	533360, 280958	398	3	13824	23.1558	1	0.997118	76.5252
SMART	SM00033:CH	5	1.00806	0.084199	506730, 534583, 528870, 519751, 537578	256	57	8740	2.99479	1	0.999305	68.0562
UP_SEQ_FEATURE	active site:Proton donor	6	1.20968	0.0862607	287019, 511749, 540303, 404191, 537087, 507188	188	79	6267	2.53178	1	1	73.2007
SMART	SM00322:KH	4	0.806452	0.0866562	613725, 506889, 519028, 618127	256	36	8740	3.7934	1	0.996375	69.1505
UP_SEQ_FEATURE	domain:Anaphylatoxin-like	2	0.403226	0.0868855	280678, 280677	188	3	6267	22.2234	1	0.999996	73.4669
GOTERM_BP_DIRECT	GO:0006457~protein folding	7	1.41129	0.087667	407129, 787681, 513277, 509914, 514472, 521540, 513397	398	107	13824	2.2723	1	0.997183	78.1504
KEGG_PATHWAY	bta00620:Pyruvate metabolism	4	0.806452	0.0879844	513967, 507817, 506459, 540335	211	38	7550	3.76653	1	0.842706	69.5639
GOTERM_MF_DIRECT	GO:0003746~translation elongation factor activity	3	0.604839	0.0888382	444990, 617277, 513605	367	18	13095	5.94687	1	0.989228	73.6783
GOTERM_CC_DIRECT	GO:0000151~ubiquitin ligase complex	5	1.00806	0.0901	530858, 506103, 535831, 517357, 617304	432	61	15461	2.93355	1	0.883977	72.7311
KEGG_PATHWAY	bta01100:Metabolic pathways	43	8.66935	0.0904115	768058, 280748, 615135, 515669, 535844, 767899, 528582, 507188, 281421, 404191, 518158, 282446, 514939, 505809, 506459, 512771, 506243, 282710, 513158, 509241, 517656, 513967, 506607, 614538, 511749, 287012, 540303, 613932, 537087, 522866, 614203, 505290, 531699, 510440, 506131, 444879, 281174, 404148, 507207, 515687, 522515, 504360, 510678	211	1235	7550	1.24585	1	0.827397	70.5936
GOTERM_MF_DIRECT	GO:0005089~Rho guanyl-nucleotide exchange factor activity	5	1.00806	0.0906895	515556, 504334, 782347, 281879, 526631	367	61	13095	2.92469	1	0.985138	74.4353
UP_SEQ_FEATURE	nucleotide phosphate-binding region:ATP	12	2.41935	0.0920788	615171, 404181, 510029, 287019, 338068, 777770, 505809, 509246, 520580, 523206, 505721, 507984	188	235	6267	1.70222	1	0.999976	75.5865
GOTERM_MF_DIRECT	GO:0004672~protein kinase activity	8	1.6129	0.0922723	404181, 513994, 533048, 617325, 519558, 282337, 507984, 538465	367	138	13095	2.06848	1	0.980335	75.0664
COG_ONTOLOGY	Posttranslational modification, protein turnover, chaperones	7	1.41129	0.09364	517656, 539784, 510029, 615866, 100141289, 505642, 529891	44	124	1671	2.14388	0.771171	0.771171	49.5188
GOTERM_CC_DIRECT	GO:0005759~mitochondrial matrix	8	1.6129	0.0941644	517656, 510440, 614027, 540329, 514472, 505809, 513397, 521960	432	139	15461	2.05982	1	0.880374	74.3605
KEGG_PATHWAY	bta04512:ECM-receptor interaction	6	1.20968	0.0943529	280936, 520167, 282187, 282882, 280958, 540664	211	87	7550	2.46772	1	0.818415	72.1976
KEGG_PATHWAY	bta04724:Glutamatergic synapse	7	1.41129	0.0945643	526435, 505740, 515669, 282648, 522866, 790867, 281879	211	113	7550	2.21658	1	0.797304	72.2813
GOTERM_CC_DIRECT	GO:0030057~desmosome	3	0.604839	0.0971057	522380, 281128, 281127	432	19	15461	5.65095	1	0.873987	75.4828
GOTERM_CC_DIRECT	GO:0034451~centriolar satellite	3	0.604839	0.0971057	532120, 538960, 528348	432	19	15461	5.65095	1	0.873987	75.4828
KEGG_PATHWAY	bta00010:Glycolysis / Gluconeogenesis	5	1.00806	0.0975849	513967, 540303, 404148, 518158, 506459	211	63	7550	2.83984	1	0.787035	73.4522
UP_KEYWORDS	Extracellular matrix	7	1.41129	0.0978389	508076, 282689, 281168, 509963, 282187, 281342, 280958	491	115	17808	2.20767	1	0.779115	74.051
GOTERM_CC_DIRECT	GO:0016605~PML body	5	1.00806	0.0986115	538615, 515573, 520580, 522943, 537578	432	63	15461	2.84042	1	0.863907	76.0395
INTERPRO	IPR027417:P-loop containing nucleoside triphosphate hydrolase	30	6.04839	0.0999924	513493, 507640, 788123, 513004, 528870, 539807, 100139105, 538348, 538936, 506315, 515301, 524142, 506911, 513605, 505721, 507984, 510029, 613954, 287019, 532723, 528109, 505787, 616537, 506131, 513994, 777770, 523206, 613313, 790891, 532964	462	821	16802	1.32891	1	0.999889	81.2174

## Sheet: cluster_all
Annotation Cluster 1	Enrichment Score: 1.9256324340271245
Category	Term	Count	%	PValue	Genes	List Total	Pop Hits	Pop Total	Fold Enrichment	Bonferroni	Benjamini	FDR
GOTERM_MF_DIRECT	GO:0098641~cadherin binding involved in cell-cell adhesion	7	1.41129	0.00944577	513277, 282689, 539646, 504482, 532723, 507270, 513128	367	65	13095	3.84259	0.990166	0.785758	12.73
GOTERM_BP_DIRECT	GO:0098609~cell-cell adhesion	7	1.41129	0.0123486	513277, 282689, 539646, 504482, 532723, 507270, 513128	398	67	13824	3.62889	1	0.926678	18.6153
GOTERM_CC_DIRECT	GO:0005913~cell-cell adherens junction	8	1.6129	0.0143301	513277, 282689, 539646, 504482, 532723, 507270, 513128, 281128	432	92	15461	3.11212	0.994848	0.584409	18.0154
Annotation Cluster 2	Enrichment Score: 1.420642732522241
Category	Term	Count	%	PValue	Genes	List Total	Pop Hits	Pop Total	Fold Enrichment	Bonferroni	Benjamini	FDR
GOTERM_BP_DIRECT	GO:0006096~glycolytic process	5	1.00806	0.00525348	510616, 287019, 540303, 404148, 518158	398	25	13824	6.94673	0.999571	0.979282	8.36153
UP_KEYWORDS	Glycolysis	4	0.806452	0.0303932	510616, 540303, 404148, 518158	491	25	17808	5.80301	0.999711	0.638876	33.2621
KEGG_PATHWAY	bta01130:Biosynthesis of antibiotics	11	2.21774	0.0611055	768058, 538104, 513967, 521401, 540303, 404148, 518158, 282446, 514939, 506459, 512771	211	206	7550	1.91069	1	0.850349	55.7087
KEGG_PATHWAY	bta01200:Carbon metabolism	7	1.41129	0.0828133	507817, 540303, 404148, 518158, 282446, 514939, 506459	211	109	7550	2.29793	1	0.849519	67.2581
KEGG_PATHWAY	bta00010:Glycolysis / Gluconeogenesis	5	1.00806	0.0975849	513967, 540303, 404148, 518158, 506459	211	63	7550	2.83984	1	0.787035	73.4522
Annotation Cluster 3	Enrichment Score: 1.3875445758020017
Category	Term	Count	%	PValue	Genes	List Total	Pop Hits	Pop Total	Fold Enrichment	Bonferroni	Benjamini	FDR
GOTERM_MF_DIRECT	GO:0004003~ATP-dependent DNA helicase activity	4	0.806452	0.0129358	510132, 505721, 507984, 522943	367	18	13095	7.92916	0.998237	0.795095	17.0392
GOTERM_BP_DIRECT	GO:0000723~telomere maintenance	3	0.604839	0.0520674	510132, 505721, 522943	398	13	13824	8.01546	1	0.990246	58.7875
GOTERM_BP_DIRECT	GO:0032508~DNA duplex unwinding	3	0.604839	0.102096	510132, 505721, 522943	398	19	13824	5.48426	1	0.998647	83.2246
Annotation Cluster 4	Enrichment Score: 1.223943534558428
Category	Term	Count	%	PValue	Genes	List Total	Pop Hits	Pop Total	Fold Enrichment	Bonferroni	Benjamini	FDR
INTERPRO	IPR001895:Guanine-nucleotide dissociation stimulator CDC25	4	0.806452	0.0404666	785402, 504334, 537312, 515820	462	28	16802	5.19542	1	0.999978	48.091
INTERPRO	IPR023578:Ras guanine nucleotide exchange factor, domain	4	0.806452	0.0404666	785402, 504334, 537312, 515820	462	28	16802	5.19542	1	0.999978	48.091
SMART	SM00147:RasGEF	4	0.806452	0.0428652	785402, 504334, 537312, 515820	256	27	8740	5.05787	0.999981	0.995628	43.3585
INTERPRO	IPR019804:Ras guanine-nucleotide exchange factor, conserved site	3	0.604839	0.0549831	785402, 504334, 537312	462	14	16802	7.79314	1	0.999943	59.2474
SMART	SM00229:RasGEFN	3	0.604839	0.104788	785402, 504334, 537312	256	19	8740	5.39062	1	0.995874	76.2173
INTERPRO	IPR000651:Ras-like guanine nucleotide exchange factor, N-terminal	3	0.604839	0.112073	785402, 504334, 537312	462	21	16802	5.19542	1	0.99985	84.8434
Annotation Cluster 5	Enrichment Score: 1.140459948135827
Category	Term	Count	%	PValue	Genes	List Total	Pop Hits	Pop Total	Fold Enrichment	Bonferroni	Benjamini	FDR
GOTERM_CC_DIRECT	GO:0034464~BBSome	3	0.604839	0.0148374	100138953, 532120, 533611	432	7	15461	15.3383	0.99573	0.541347	18.5942
GOTERM_BP_DIRECT	GO:0035058~nonmotile primary cilium assembly	4	0.806452	0.0271878	100138953, 532120, 538960, 533611	398	23	13824	6.04064	1	0.988983	36.6785
GOTERM_CC_DIRECT	GO:0036064~ciliary basal body	5	1.00806	0.136112	100138953, 532120, 517994, 525675, 533611	432	71	15461	2.52038	1	0.911739	86.6488
GOTERM_BP_DIRECT	GO:0045444~fat cell differentiation	3	0.604839	0.499496	100138953, 532120, 533611	398	58	13824	1.79657	1	0.999996	99.999
Annotation Cluster 6	Enrichment Score: 1.0591357542209652
Category	Term	Count	%	PValue	Genes	List Total	Pop Hits	Pop Total	Fold Enrichment	Bonferroni	Benjamini	FDR
INTERPRO	IPR004087:K Homology domain	4	0.806452	0.0752734	613725, 506889, 519028, 618127	462	36	16802	4.04089	1	0.999879	71.1242
SMART	SM00322:KH	4	0.806452	0.0866562	613725, 506889, 519028, 618127	256	36	8740	3.7934	1	0.996375	69.1505
INTERPRO	IPR004088:K Homology domain, type 1	4	0.806452	0.101895	613725, 506889, 519028, 618127	462	41	16802	3.54809	1	0.999907	81.8377
Annotation Cluster 7	Enrichment Score: 0.8809191544362118
Category	Term	Count	%	PValue	Genes	List Total	Pop Hits	Pop Total	Fold Enrichment	Bonferroni	Benjamini	FDR
INTERPRO	IPR000980:SH2 domain	7	1.41129	0.0768175	508541, 282375, 615866, 407210, 509246, 515820, 617777	462	108	16802	2.35718	1	0.999749	71.8801
UP_SEQ_FEATURE	domain:SH2	3	0.604839	0.108745	508541, 282375, 509246	188	19	6267	5.26344	1	1	81.3714
UP_KEYWORDS	SH2 domain	4	0.806452	0.114189	508541, 282375, 407210, 509246	491	43	17808	3.37385	1	0.798208	79.5803
SMART	SM00252:SH2	5	1.00806	0.313928	282375, 407210, 509246, 515820, 617777	256	97	8740	1.75983	1	0.998737	99.2467
Annotation Cluster 8	Enrichment Score: 0.8389035083216426
Category	Term	Count	%	PValue	Genes	List Total	Pop Hits	Pop Total	Fold Enrichment	Bonferroni	Benjamini	FDR
GOTERM_BP_DIRECT	GO:0006956~complement activation	4	0.806452	0.00173556	515440, 522347, 527391, 280677	398	9	13824	15.4372	0.92246	0.92246	2.83855
KEGG_PATHWAY	bta04610:Complement and coagulation cascades	6	1.20968	0.0545449	515440, 522347, 527391, 280958, 280678, 280677	211	74	7550	2.90124	0.999999	0.855006	51.5406
UP_KEYWORDS	Complement pathway	3	0.604839	0.0626383	515440, 280678, 280677	491	15	17808	7.25377	1	0.759032	57.153
GOTERM_BP_DIRECT	GO:0006958~complement activation, classical pathway	3	0.604839	0.0757404	515440, 280678, 280677	398	16	13824	6.51256	1	0.995998	72.9012
KEGG_PATHWAY	bta05150:Staphylococcus aureus infection	4	0.806452	0.225551	515440, 522347, 280678, 280677	211	59	7550	2.4259	1	0.810787	96.3168
UP_KEYWORDS	Immunity	7	1.41129	0.278601	281614, 515440, 493720, 509246, 281368, 280678, 280677	491	160	17808	1.58676	1	0.884133	98.6139
KEGG_PATHWAY	bta05133:Pertussis	4	0.806452	0.362305	515440, 616115, 280678, 280677	211	77	7550	1.8588	1	0.880683	99.7005
UP_KEYWORDS	Innate immunity	4	0.806452	0.50837	515440, 493720, 280678, 280677	491	98	17808	1.48036	1	0.939052	99.9909
KEGG_PATHWAY	bta05322:Systemic lupus erythematosus	4	0.806452	0.87774	515440, 527391, 280678, 280677	211	178	7550	0.80409	1	0.988238	100
GOTERM_BP_DIRECT	GO:0045087~innate immune response	5	1.00806	0.894863	515440, 493720, 509246, 616115, 280678	398	227	13824	0.765059	1	1	100
Annotation Cluster 9	Enrichment Score: 0.7566397199089518
Category	Term	Count	%	PValue	Genes	List Total	Pop Hits	Pop Total	Fold Enrichment	Bonferroni	Benjamini	FDR
GOTERM_CC_DIRECT	GO:0043005~neuron projection	9	1.81452	0.0291719	280936, 404181, 100141021, 540815, 511110, 530858, 528379, 507837, 525675	432	130	15461	2.47772	0.99998	0.660613	33.4648
GOTERM_CC_DIRECT	GO:0045202~synapse	7	1.41129	0.0814254	404181, 280748, 100141021, 407129, 520167, 528379, 280678	432	108	15461	2.31968	1	0.873395	68.9274
UP_KEYWORDS	Synaptosome	3	0.604839	0.140409	404181, 100141021, 528379	491	24	17808	4.5336	1	0.850736	86.2256
UP_KEYWORDS	Cell junction	10	2.01613	0.278821	280936, 404181, 100141021, 615464, 538745, 528379, 532723, 281128, 281127, 280678	491	257	17808	1.41124	1	0.878119	98.6195
UP_KEYWORDS	Synapse	6	1.20968	0.330862	280936, 404181, 100141021, 528379, 532723, 280678	491	138	17808	1.57691	1	0.885205	99.4826
GOTERM_CC_DIRECT	GO:0030054~cell junction	4	0.806452	0.937714	404181, 100141021, 532723, 280678	432	212	15461	0.675271	1	0.999991	100
Annotation Cluster 10	Enrichment Score: 0.7486452992473555
Category	Term	Count	%	PValue	Genes	List Total	Pop Hits	Pop Total	Fold Enrichment	Bonferroni	Benjamini	FDR
UP_KEYWORDS	Nucleotide-binding	38	7.66129	0.147501	615171, 510616, 513493, 514472, 507640, 533048, 538936, 505740, 506315, 515573, 505809, 506103, 509246, 524142, 506911, 520580, 505721, 100847824, 507984, 510029, 510075, 287019, 510684, 100139910, 532723, 521540, 537380, 523474, 505787, 404181, 506131, 338068, 777770, 540568, 523206, 613313, 525675, 532964	491	1124	17808	1.22617	1	0.839866	87.6425
UP_KEYWORDS	ATP-binding	29	5.84677	0.180062	615171, 510616, 513493, 514472, 507640, 515573, 505809, 509246, 506103, 520580, 505721, 507984, 100847824, 510029, 510075, 287019, 510684, 521540, 537380, 523474, 505787, 404181, 506131, 338068, 777770, 540568, 523206, 525675, 532964	491	848	17808	1.24033	1	0.856461	92.5811
GOTERM_MF_DIRECT	GO:0005524~ATP binding	40	8.06452	0.213721	615171, 510616, 513493, 514472, 507640, 533048, 528870, 513397, 617325, 519558, 526949, 515573, 505809, 506103, 509246, 541215, 520580, 505721, 100847824, 538465, 507984, 510029, 510075, 287019, 510684, 521540, 537380, 523474, 505787, 404181, 506131, 524075, 513994, 338068, 777770, 540568, 523206, 790891, 525675, 532964	367	1224	13095	1.16605	1	0.99898	96.8243
Annotation Cluster 11	Enrichment Score: 0.7461372834739444
Category	Term	Count	%	PValue	Genes	List Total	Pop Hits	Pop Total	Fold Enrichment	Bonferroni	Benjamini	FDR
SMART	SM00005:DEATH	3	0.604839	0.133865	493720, 616115, 537922	256	22	8740	4.65554	1	0.997369	84.5047
INTERPRO	IPR000488:Death domain	3	0.604839	0.158944	493720, 616115, 537922	462	26	16802	4.1963	1	0.999974	93.5915
INTERPRO	IPR011029:Death-like domain	4	0.806452	0.271442	534251, 493720, 616115, 537922	462	66	16802	2.20412	1	0.999997	99.344
Annotation Cluster 12	Enrichment Score: 0.7444726457126543
Category	Term	Count	%	PValue	Genes	List Total	Pop Hits	Pop Total	Fold Enrichment	Bonferroni	Benjamini	FDR
GOTERM_BP_DIRECT	GO:0006289~nucleotide-excision repair	4	0.806452	0.0338597	512977, 513458, 507984, 540564	398	25	13824	5.55739	1	0.98538	43.5057
UP_KEYWORDS	DNA repair	6	1.20968	0.245734	512977, 520580, 505721, 507984, 522943, 540564	491	122	17808	1.78371	1	0.902372	97.5152
UP_KEYWORDS	DNA damage	6	1.20968	0.314583	512977, 520580, 505721, 507984, 522943, 540564	491	135	17808	1.61195	1	0.880172	99.291
GOTERM_BP_DIRECT	GO:0006281~DNA repair	5	1.00806	0.402	507169, 520580, 505721, 507984, 513606	398	112	13824	1.55061	1	0.999977	99.9801
Annotation Cluster 13	Enrichment Score: 0.7397135026820744
Category	Term	Count	%	PValue	Genes	List Total	Pop Hits	Pop Total	Fold Enrichment	Bonferroni	Benjamini	FDR
GOTERM_BP_DIRECT	GO:0006457~protein folding	7	1.41129	0.087667	407129, 787681, 513277, 509914, 514472, 521540, 513397	398	107	13824	2.2723	1	0.997843	78.1504
GOTERM_MF_DIRECT	GO:0051082~unfolded protein binding	4	0.806452	0.163503	513277, 509914, 514472, 521540	367	50	13095	2.8545	1	0.996961	92.2804
UP_KEYWORDS	Chaperone	5	1.00806	0.421209	407129, 509914, 513315, 514472, 521540	491	120	17808	1.5112	1	0.909823	99.9226
Annotation Cluster 14	Enrichment Score: 0.6920823058762147
Category	Term	Count	%	PValue	Genes	List Total	Pop Hits	Pop Total	Fold Enrichment	Bonferroni	Benjamini	FDR
GOTERM_MF_DIRECT	GO:0005089~Rho guanyl-nucleotide exchange factor activity	5	1.00806	0.0906895	515556, 504334, 782347, 281879, 526631	367	61	13095	2.92469	1	0.985138	74.4353
GOTERM_BP_DIRECT	GO:0035023~regulation of Rho protein signal transduction	5	1.00806	0.141618	513493, 515556, 782347, 281879, 526631	398	70	13824	2.48098	1	0.99957	92.0459
INTERPRO	IPR000219:Dbl homology (DH) domain	4	0.806452	0.256553	515556, 782347, 281879, 526631	462	64	16802	2.273	1	0.999995	99.0956
SMART	SM00325:RhoGEF	3	0.604839	0.517392	515556, 782347, 526631	256	59	8740	1.73596	1	0.999462	99.9922
Annotation Cluster 15	Enrichment Score: 0.6176330354037458
Category	Term	Count	%	PValue	Genes	List Total	Pop Hits	Pop Total	Fold Enrichment	Bonferroni	Benjamini	FDR
GOTERM_BP_DIRECT	GO:0016042~lipid catabolic process	5	1.00806	0.141618	280748, 515669, 613932, 506243, 281421	398	70	13824	2.48098	1	0.99957	92.0459
UP_KEYWORDS	Lipid degradation	4	0.806452	0.257917	280748, 515669, 613932, 522866	491	64	17808	2.2668	1	0.880969	97.9926
UP_KEYWORDS	Lipid metabolism	8	1.6129	0.384152	280748, 282652, 515669, 613932, 537087, 506243, 522866, 280677	491	215	17808	1.34954	1	0.898254	99.8256
Annotation Cluster 16	Enrichment Score: 0.5941788413701209
Category	Term	Count	%	PValue	Genes	List Total	Pop Hits	Pop Total	Fold Enrichment	Bonferroni	Benjamini	FDR
KEGG_PATHWAY	bta04972:Pancreatic secretion	8	1.6129	0.0172047	280748, 100139105, 528454, 505740, 515669, 540568, 506243, 281879	211	96	7550	2.98183	0.984738	0.876461	20.0804
KEGG_PATHWAY	bta04925:Aldosterone synthesis and secretion	7	1.41129	0.0222669	505740, 506967, 515669, 533048, 281299, 513928, 281879	211	79	7550	3.17056	0.995604	0.836181	25.2372
KEGG_PATHWAY	bta04911:Insulin secretion	6	1.20968	0.0776313	505740, 515669, 534591, 513928, 537312, 281879	211	82	7550	2.61819	1	0.885126	64.7866
KEGG_PATHWAY	bta04730:Long-term depression	5	1.00806	0.0810512	515669, 282648, 522866, 100139857, 281879	211	59	7550	3.03237	1	0.869587	66.4362
KEGG_PATHWAY	bta04724:Glutamatergic synapse	7	1.41129	0.0945643	526435, 505740, 515669, 282648, 522866, 790867, 281879	211	113	7550	2.21658	1	0.797304	72.2813
KEGG_PATHWAY	bta04924:Renin secretion	5	1.00806	0.110937	505740, 515669, 533048, 790867, 281879	211	66	7550	2.71076	1	0.811182	78.1016
KEGG_PATHWAY	bta04270:Vascular smooth muscle contraction	7	1.41129	0.113775	505740, 515669, 533048, 506243, 281918, 522866, 281879	211	119	7550	2.10482	1	0.801542	78.9876
KEGG_PATHWAY	bta04918:Thyroid hormone synthesis	5	1.00806	0.125056	407129, 505740, 515669, 513928, 281879	211	69	7550	2.5929	1	0.816318	82.1919
KEGG_PATHWAY	bta04728:Dopaminergic synapse	7	1.41129	0.14597	505740, 515669, 282648, 513928, 790867, 537043, 281879	211	128	7550	1.95683	1	0.781525	86.9711
KEGG_PATHWAY	bta04022:cGMP-PKG signaling pathway	8	1.6129	0.15421	505740, 515669, 533048, 540568, 281918, 513928, 790867, 281879	211	159	7550	1.80035	1	0.788271	88.5046
KEGG_PATHWAY	bta04970:Salivary secretion	5	1.00806	0.199567	505740, 515669, 534591, 280844, 281879	211	83	7550	2.15554	1	0.803221	94.3592
KEGG_PATHWAY	bta04921:Oxytocin signaling pathway	7	1.41129	0.216349	505740, 515669, 533048, 522866, 790867, 100139857, 281879	211	145	7550	1.72741	1	0.804471	95.7097
KEGG_PATHWAY	bta04720:Long-term potentiation	4	0.806452	0.270497	515669, 505453, 790867, 281879	211	65	7550	2.20197	1	0.843373	98.2984
KEGG_PATHWAY	bta04611:Platelet activation	6	1.20968	0.278608	505740, 515669, 282187, 522866, 280958, 281879	211	127	7550	1.69049	1	0.839639	98.5272
KEGG_PATHWAY	bta04723:Retrograde endocannabinoid signaling	5	1.00806	0.328175	505740, 515669, 282648, 281879, 505290	211	104	7550	1.72029	1	0.85298	99.4127
KEGG_PATHWAY	bta04726:Serotonergic synapse	5	1.00806	0.404418	505740, 515669, 282648, 522866, 281879	211	116	7550	1.54233	1	0.883897	99.8761
KEGG_PATHWAY	bta04912:GnRH signaling pathway	4	0.806452	0.430208	505740, 515669, 522866, 281879	211	86	7550	1.66428	1	0.883717	99.93
KEGG_PATHWAY	bta04713:Circadian entrainment	4	0.806452	0.509381	505740, 515669, 100139857, 281879	211	97	7550	1.47555	1	0.913845	99.9899
KEGG_PATHWAY	bta04915:Estrogen signaling pathway	4	0.806452	0.516299	505740, 515669, 513928, 281879	211	98	7550	1.46049	1	0.915016	99.9916
INTERPRO	IPR005821:Ion transport domain	4	0.806452	0.53343	282648, 539528, 100139857, 281879	462	102	16802	1.42619	1	0.999998	99.9994
KEGG_PATHWAY	bta04750:Inflammatory mediator regulation of TRP channels	4	0.806452	0.556683	505740, 515669, 522866, 281879	211	104	7550	1.37623	1	0.924193	99.9973
KEGG_PATHWAY	bta05031:Amphetamine addiction	3	0.604839	0.560426	505740, 513928, 790867	211	67	7550	1.60218	1	0.923663	99.9975
KEGG_PATHWAY	bta04725:Cholinergic synapse	4	0.806452	0.595	505740, 515669, 282648, 281879	211	110	7550	1.30116	1	0.934316	99.9991
KEGG_PATHWAY	bta04971:Gastric acid secretion	3	0.604839	0.599814	505740, 515669, 281879	211	72	7550	1.49092	1	0.934445	99.9993
KEGG_PATHWAY	bta04020:Calcium signaling pathway	6	1.20968	0.608947	515669, 282648, 540568, 790867, 100139857, 281879	211	189	7550	1.13594	1	0.934535	99.9995
KEGG_PATHWAY	bta04540:Gap junction	3	0.604839	0.713767	505740, 515669, 281879	211	89	7550	1.20613	1	0.958141	100
KEGG_PATHWAY	bta04261:Adrenergic signaling in cardiomyocytes	4	0.806452	0.735018	505740, 515669, 513928, 537312	211	136	7550	1.05241	1	0.961842	100
KEGG_PATHWAY	bta04114:Oocyte meiosis	3	0.604839	0.831179	505740, 790867, 281879	211	114	7550	0.941631	1	0.978981	100
KEGG_PATHWAY	bta04015:Rap1 signaling pathway	4	0.806452	0.94093	505740, 515669, 282121, 537312	211	214	7550	0.668822	1	0.996259	100
Annotation Cluster 17	Enrichment Score: 0.5907278410758271
Category	Term	Count	%	PValue	Genes	List Total	Pop Hits	Pop Total	Fold Enrichment	Bonferroni	Benjamini	FDR
KEGG_PATHWAY	bta04512:ECM-receptor interaction	6	1.20968	0.0943529	280936, 520167, 282187, 282882, 280958, 540664	211	87	7550	2.46772	1	0.818415	72.1976
KEGG_PATHWAY	bta04151:PI3K-Akt signaling pathway	13	2.62097	0.258656	404181, 787914, 786335, 520167, 282121, 788087, 282187, 616115, 513928, 282882, 280958, 529235, 540664	211	347	7550	1.34054	1	0.835233	97.905
KEGG_PATHWAY	bta04510:Focal adhesion	6	1.20968	0.692371	520167, 282121, 282187, 282882, 280958, 540664	211	208	7550	1.03217	1	0.952872	100
Annotation Cluster 18	Enrichment Score: 0.5691104902426884
Category	Term	Count	%	PValue	Genes	List Total	Pop Hits	Pop Total	Fold Enrichment	Bonferroni	Benjamini	FDR
UP_KEYWORDS	Lysosome	7	1.41129	0.0698261	616003, 537087, 518169, 515687, 507188, 281421, 504503	491	105	17808	2.41792	1	0.720276	61.2636
INTERPRO	IPR013781:Glycoside hydrolase, catalytic domain	3	0.604839	0.228949	537087, 515687, 507188	462	33	16802	3.30618	1	0.999997	98.3868
KEGG_PATHWAY	bta04142:Lysosome	6	1.20968	0.273238	510539, 537087, 518169, 515687, 507188, 281421	211	126	7550	1.7039	1	0.839802	98.3791
GOTERM_BP_DIRECT	GO:0005975~carbohydrate metabolic process	5	1.00806	0.330046	525042, 521401, 537087, 515687, 507188	398	101	13824	1.71949	1	0.999926	99.8693
GOTERM_CC_DIRECT	GO:0005764~lysosome	6	1.20968	0.357311	281661, 618505, 518169, 515687, 507188, 281421	432	141	15461	1.52295	1	0.970041	99.7721
INTERPRO	IPR017853:Glycoside hydrolase, superfamily	3	0.604839	0.380879	537087, 515687, 507188	462	48	16802	2.273	1	0.99999	99.9505
UP_KEYWORDS	Glycosidase	3	0.604839	0.529081	537087, 515687, 507188	491	64	17808	1.7001	1	0.936787	99.9948
Annotation Cluster 19	Enrichment Score: 0.5410176582468825
Category	Term	Count	%	PValue	Genes	List Total	Pop Hits	Pop Total	Fold Enrichment	Bonferroni	Benjamini	FDR
INTERPRO	IPR013320:Concanavalin A-like lectin/glucanase, subgroup	8	1.6129	0.250415	407129, 538657, 508076, 614804, 512922, 100139857, 523793, 525599	462	186	16802	1.56421	1	0.999996	98.9695
INTERPRO	IPR003877:SPla/RYanodine receptor SPRY	4	0.806452	0.278922	538657, 512922, 100139857, 525599	462	67	16802	2.17122	1	0.999996	99.4431
SMART	SM00449:SPRY	4	0.806452	0.302774	538657, 512922, 100139857, 525599	256	66	8740	2.06913	1	0.99942	99.0714
INTERPRO	IPR001870:B30.2/SPRY domain	4	0.806452	0.324091	538657, 512922, 100139857, 525599	462	73	16802	1.99277	1	0.999994	99.8006
Annotation Cluster 20	Enrichment Score: 0.5321563059174482
Category	Term	Count	%	PValue	Genes	List Total	Pop Hits	Pop Total	Fold Enrichment	Bonferroni	Benjamini	FDR
UP_KEYWORDS	Laminin EGF-like domain	3	0.604839	0.0782858	520167, 523720, 523793	491	17	17808	6.40038	1	0.718031	65.6338
SMART	SM00180:EGF_Lam	3	0.604839	0.228517	520167, 523720, 523793	256	31	8740	3.30393	1	0.999679	96.5477
INTERPRO	IPR002049:EGF-like, laminin	3	0.604839	0.228949	520167, 523720, 523793	462	33	16802	3.30618	1	0.999997	98.3868
SMART	SM00181:EGF	5	1.00806	0.672428	520167, 523720, 523701, 540664, 523793	256	156	8740	1.09425	1	0.999928	99.9999
INTERPRO	IPR000742:Epidermal growth factor-like domain	5	1.00806	0.792927	520167, 523720, 523701, 540664, 523793	462	197	16802	0.923045	1	1	100
Annotation Cluster 21	Enrichment Score: 0.5298089183444555
Category	Term	Count	%	PValue	Genes	List Total	Pop Hits	Pop Total	Fold Enrichment	Bonferroni	Benjamini	FDR
UP_SEQ_FEATURE	active site:Proton acceptor	12	2.41935	0.0385738	615171, 404181, 525042, 510440, 282652, 511749, 338068, 540303, 518158, 509246, 520580, 280844	188	202	6267	1.9803	1	1	43.6849
UP_SEQ_FEATURE	nucleotide phosphate-binding region:ATP	12	2.41935	0.0920788	615171, 404181, 510029, 287019, 338068, 777770, 505809, 509246, 520580, 523206, 505721, 507984	188	235	6267	1.70222	1	1	75.5865
UP_SEQ_FEATURE	domain:Protein kinase	6	1.20968	0.144113	615171, 404181, 338068, 509246, 520580, 538465	188	93	6267	2.15065	1	0.999999	89.6847
UP_SEQ_FEATURE	binding site:ATP	6	1.20968	0.276185	615171, 404181, 338068, 514472, 509246, 520580	188	118	6267	1.69501	1	1	99.1067
GOTERM_BP_DIRECT	GO:0006468~protein phosphorylation	6	1.20968	0.35805	615171, 404181, 520580, 507984, 538465, 521960	398	137	13824	1.52118	1	0.999956	99.9356
SMART	SM00220:S_TKc	12	2.41935	0.401373	615171, 404181, 526949, 513994, 338068, 541215, 520580, 617325, 519558, 537380, 538465, 525675	256	338	8740	1.21209	1	0.999149	99.8716
INTERPRO	IPR011009:Protein kinase-like domain	16	3.22581	0.403007	615171, 507169, 533048, 617325, 519558, 537380, 404181, 526956, 526949, 513994, 338068, 509246, 541215, 520580, 538465, 525675	462	500	16802	1.16377	1	0.999993	99.9722
INTERPRO	IPR000719:Protein kinase, catalytic domain	14	2.82258	0.503691	615171, 533048, 617325, 537380, 519558, 404181, 526949, 513994, 338068, 509246, 541215, 520580, 538465, 525675	462	462	16802	1.10206	1	0.999997	99.9985
INTERPRO	IPR017441:Protein kinase, ATP binding site	10	2.01613	0.618695	615171, 404181, 526949, 338068, 509246, 541215, 520580, 519558, 537380, 525675	462	348	16802	1.04506	1	1	100
INTERPRO	IPR008271:Serine/threonine-protein kinase, active site	8	1.6129	0.690204	615171, 404181, 338068, 520580, 617325, 519558, 537380, 525675	462	291	16802	0.999807	1	1	100
UP_KEYWORDS	Serine/threonine-protein kinase	5	1.00806	0.843963	615171, 404181, 338068, 520580, 525675	491	214	17808	0.847403	1	0.991046	100
Annotation Cluster 22	Enrichment Score: 0.5196765688890717
Category	Term	Count	%	PValue	Genes	List Total	Pop Hits	Pop Total	Fold Enrichment	Bonferroni	Benjamini	FDR
SMART	SM00165:UBA	3	0.604839	0.196165	100141289, 540564, 525675	256	28	8740	3.65792	1	0.999563	94.1172
INTERPRO	IPR015940:Ubiquitin-associated/translation elongation factor EF1B, N-terminal, eukaryote	3	0.604839	0.320905	100141289, 540564, 525675	462	42	16802	2.59771	1	0.999995	99.7851
INTERPRO	IPR009060:UBA-like	3	0.604839	0.438504	100141289, 540564, 525675	462	54	16802	2.02044	1	0.999997	99.9895
Annotation Cluster 23	Enrichment Score: 0.5071410343297056
Category	Term	Count	%	PValue	Genes	List Total	Pop Hits	Pop Total	Fold Enrichment	Bonferroni	Benjamini	FDR
GOTERM_BP_DIRECT	GO:0007264~small GTPase mediated signal transduction	12	2.41935	0.0289798	100139105, 613954, 513994, 538936, 785402, 532723, 506911, 504334, 513397, 537312, 515820, 616537	398	199	13824	2.09449	1	0.980461	38.5847
UP_SEQ_FEATURE	short sequence motif:Effector region	3	0.604839	0.358154	532723, 506911, 616537	188	42	6267	2.38108	1	1	99.8454
GOTERM_MF_DIRECT	GO:0005525~GTP binding	12	2.41935	0.371349	100139105, 538348, 613954, 513994, 538936, 506315, 532723, 524142, 506911, 613313, 513605, 616537	367	345	13095	1.24109	1	0.999769	99.8718
INTERPRO	IPR005225:Small GTP-binding protein domain	6	1.20968	0.399561	100139105, 613954, 538936, 532723, 506911, 616537	462	151	16802	1.44508	1	0.999994	99.9695
UP_SEQ_FEATURE	lipid moiety-binding region:S-geranylgeranyl cysteine	3	0.604839	0.442603	532723, 506911, 616537	188	50	6267	2.00011	1	1	99.9803
INTERPRO	IPR001806:Small GTPase superfamily	5	1.00806	0.46186	100139105, 613954, 532723, 506911, 616537	462	127	16802	1.43181	1	0.999998	99.9946
UP_SEQ_FEATURE	nucleotide phosphate-binding region:GTP	4	0.806452	0.895278	538936, 532723, 506911, 616537	188	173	6267	0.770754	1	1	100
Annotation Cluster 24	Enrichment Score: 0.46347556044126414
Category	Term	Count	%	PValue	Genes	List Total	Pop Hits	Pop Total	Fold Enrichment	Bonferroni	Benjamini	FDR
INTERPRO	IPR008936:Rho GTPase activation protein	5	1.00806	0.171627	513493, 515556, 535844, 539646, 540393	462	79	16802	2.30177	1	0.999966	94.9649
INTERPRO	IPR000198:Rho GTPase-activating protein domain	3	0.604839	0.475259	513493, 515556, 540393	462	58	16802	1.8811	1	0.999997	99.9964
SMART	SM00324:RhoGAP	3	0.604839	0.49895	513493, 515556, 540393	256	57	8740	1.79688	1	0.999586	99.9872
Annotation Cluster 25	Enrichment Score: 0.4529030274725018
Category	Term	Count	%	PValue	Genes	List Total	Pop Hits	Pop Total	Fold Enrichment	Bonferroni	Benjamini	FDR
UP_SEQ_FEATURE	domain:EF-hand 1	5	1.00806	0.241405	404146, 281661, 534482, 618020, 338067	188	84	6267	1.98423	1	1	98.2278
UP_SEQ_FEATURE	calcium-binding region:1	4	0.806452	0.281919	404146, 281661, 618020, 338067	188	62	6267	2.15065	1	1	99.2046
UP_SEQ_FEATURE	domain:EF-hand 2	4	0.806452	0.460643	281661, 534482, 618020, 338067	188	84	6267	1.58739	1	1	99.9878
UP_SEQ_FEATURE	calcium-binding region:2	3	0.604839	0.492213	404146, 281661, 618020	188	55	6267	1.81828	1	1	99.9949
Annotation Cluster 26	Enrichment Score: 0.44948282007651863
Category	Term	Count	%	PValue	Genes	List Total	Pop Hits	Pop Total	Fold Enrichment	Bonferroni	Benjamini	FDR
UP_SEQ_FEATURE	glycosylation site:N-linked (GlcNAc...)	37	7.45968	0.111789	280748, 518991, 507455, 518169, 515440, 538685, 509963, 507188, 281421, 520625, 507026, 513700, 404191, 281168, 767936, 280936, 534482, 519461, 281386, 613932, 537087, 281368, 280958, 280844, 280678, 280677, 281123, 521837, 281614, 507830, 338068, 338067, 281299, 281128, 281127, 512581, 504503	188	988	6267	1.24838	1	0.999998	82.279
UP_KEYWORDS	Glycoprotein	38	7.66129	0.191613	280748, 507455, 518169, 515440, 538685, 509963, 507188, 281421, 520625, 507026, 513700, 404191, 282121, 281168, 767936, 282187, 280936, 534482, 519461, 281386, 613932, 537087, 281368, 280958, 280844, 280678, 280677, 281123, 521837, 281614, 507830, 338068, 338067, 281299, 281128, 281127, 512581, 504503	491	1157	17808	1.1912	1	0.846167	93.8397
UP_SEQ_FEATURE	signal peptide	34	6.85484	0.310832	280748, 518991, 515440, 518169, 538685, 509963, 507188, 281500, 281421, 616139, 507026, 513700, 282121, 518158, 281168, 282187, 280880, 534482, 281386, 537087, 282882, 281342, 280958, 280844, 280677, 521837, 281614, 507830, 338068, 281419, 338067, 281477, 281127, 512581	188	1010	6267	1.12217	1	1	99.5635
UP_KEYWORDS	Secreted	26	5.24194	0.432671	280748, 515440, 282689, 509963, 281500, 281421, 513700, 518158, 282121, 281168, 100126041, 280880, 282187, 506243, 534482, 508076, 281386, 281342, 281368, 280844, 280958, 280678, 280677, 404146, 509530, 281477	491	868	17808	1.08639	1	0.910502	99.9405
UP_SEQ_FEATURE	disulfide bond	23	4.6371	0.758935	280748, 534482, 515440, 537087, 518169, 509963, 281342, 281368, 280958, 280844, 281500, 281421, 280678, 280677, 521837, 507026, 281123, 281614, 513700, 282121, 281168, 767936, 512581	188	830	6267	0.923744	1	1	100
UP_KEYWORDS	Disulfide bond	38	7.66129	0.919156	280748, 518169, 515440, 509963, 281500, 523793, 281421, 507026, 513700, 528454, 404191, 523720, 282121, 281168, 767936, 282187, 506243, 527391, 534482, 508076, 537087, 522347, 523701, 281342, 281368, 280958, 280844, 280678, 614203, 280677, 281123, 521837, 530795, 281614, 520167, 534082, 512581, 533203	491	1643	17808	0.838841	1	0.997739	100
Annotation Cluster 27	Enrichment Score: 0.436385973089625
Category	Term	Count	%	PValue	Genes	List Total	Pop Hits	Pop Total	Fold Enrichment	Bonferroni	Benjamini	FDR
INTERPRO	IPR020894:Cadherin conserved site	4	0.806452	0.293937	784716, 281128, 281127, 523793	462	69	16802	2.10829	1	0.999996	99.6012
INTERPRO	IPR002126:Cadherin	4	0.806452	0.331638	784716, 281128, 281127, 523793	462	74	16802	1.96584	1	0.999988	99.8331
INTERPRO	IPR015919:Cadherin-like	4	0.806452	0.35425	784716, 281128, 281127, 523793	462	77	16802	1.88924	1	0.999991	99.9034
SMART	SM00112:CA	4	0.806452	0.359044	784716, 281128, 281127, 523793	256	73	8740	1.87072	1	0.99848	99.6883
GOTERM_BP_DIRECT	GO:0007156~homophilic cell adhesion via plasma membrane adhesion molecules	4	0.806452	0.530511	784716, 281128, 281127, 523793	398	97	13824	1.43232	1	0.999998	99.9996
Annotation Cluster 28	Enrichment Score: 0.4358639185876144
Category	Term	Count	%	PValue	Genes	List Total	Pop Hits	Pop Total	Fold Enrichment	Bonferroni	Benjamini	FDR
INTERPRO	IPR001452:Src homology-3 domain	8	1.6129	0.306916	517987, 509246, 507837, 528109, 782347, 540393, 526631, 532964	462	199	16802	1.46203	1	0.999997	99.703
SMART	SM00326:SH3	8	1.6129	0.313707	517987, 509246, 507837, 528109, 782347, 540393, 526631, 532964	256	189	8740	1.44511	1	0.999239	99.2435
UP_KEYWORDS	SH3 domain	5	1.00806	0.511523	509246, 507837, 528109, 782347, 532964	491	135	17808	1.34329	1	0.938058	99.9916
Annotation Cluster 29	Enrichment Score: 0.43407087616664486
Category	Term	Count	%	PValue	Genes	List Total	Pop Hits	Pop Total	Fold Enrichment	Bonferroni	Benjamini	FDR
KEGG_PATHWAY	bta03010:Ribosome	7	1.41129	0.169501	787914, 508825, 532842, 506358, 507270, 513128, 326602	211	134	7550	1.86921	1	0.775082	90.9179
UP_KEYWORDS	Ribonucleoprotein	9	1.81452	0.277832	787914, 508825, 506889, 532842, 615240, 506358, 507270, 513128, 326602	491	224	17808	1.45723	1	0.889569	98.5945
UP_KEYWORDS	Ribosomal protein	7	1.41129	0.316884	787914, 508825, 532842, 506358, 507270, 513128, 326602	491	168	17808	1.5112	1	0.877053	99.3216
GOTERM_CC_DIRECT	GO:0005762~mitochondrial large ribosomal subunit	3	0.604839	0.348197	508825, 532842, 506358	432	44	15461	2.44018	1	0.973567	99.7234
GOTERM_MF_DIRECT	GO:0003735~structural constituent of ribosome	7	1.41129	0.546589	787914, 613948, 508825, 532842, 506358, 507270, 326602	367	212	13095	1.17815	1	0.999949	99.9988
GOTERM_BP_DIRECT	GO:0006412~translation	4	0.806452	0.875455	787914, 613948, 513128, 326602	398	172	13824	0.80776	1	1	100
Annotation Cluster 30	Enrichment Score: 0.428436741813658
Category	Term	Count	%	PValue	Genes	List Total	Pop Hits	Pop Total	Fold Enrichment	Bonferroni	Benjamini	FDR
UP_SEQ_FEATURE	glycosylation site:N-linked (GlcNAc...)	37	7.45968	0.111789	280748, 518991, 507455, 518169, 515440, 538685, 509963, 507188, 281421, 520625, 507026, 513700, 404191, 281168, 767936, 280936, 534482, 519461, 281386, 613932, 537087, 281368, 280958, 280844, 280678, 280677, 281123, 521837, 281614, 507830, 338068, 338067, 281299, 281128, 281127, 512581, 504503	188	988	6267	1.24838	1	0.999998	82.279
UP_SEQ_FEATURE	topological domain:Extracellular	19	3.83065	0.345875	280936, 519461, 518991, 538745, 281368, 281879, 520625, 507026, 616139, 281123, 281614, 615464, 338068, 767936, 281299, 281128, 281127, 512581, 504503	188	540	6267	1.1729	1	1	99.7962
UP_SEQ_FEATURE	topological domain:Cytoplasmic	23	4.6371	0.59572	280936, 519461, 518991, 511749, 538745, 618020, 613932, 281368, 281879, 520625, 281123, 616139, 281614, 615464, 338068, 404191, 506103, 767936, 281299, 281128, 281127, 512581, 504503	188	760	6267	1.00883	1	1	99.9998
UP_SEQ_FEATURE	transmembrane region	34	6.85484	0.839249	613948, 518991, 538745, 507455, 618020, 281879, 520625, 616139, 507026, 526045, 615464, 404191, 506103, 767936, 280936, 519461, 614538, 616003, 511749, 613932, 281918, 281368, 281123, 521837, 281614, 507830, 338068, 537067, 281299, 281128, 281127, 511554, 512581, 504503	188	1269	6267	0.893139	1	1	100
Annotation Cluster 31	Enrichment Score: 0.41332673166743794
Category	Term	Count	%	PValue	Genes	List Total	Pop Hits	Pop Total	Fold Enrichment	Bonferroni	Benjamini	FDR
INTERPRO	IPR015424:Pyridoxal phosphate-dependent transferase	3	0.604839	0.35113	517656, 528582, 522515	462	45	16802	2.42453	1	0.999993	99.8957
INTERPRO	IPR015421:Pyridoxal phosphate-dependent transferase, major region, subdomain 1	3	0.604839	0.35113	517656, 528582, 522515	462	45	16802	2.42453	1	0.999993	99.8957
GOTERM_MF_DIRECT	GO:0030170~pyridoxal phosphate binding	3	0.604839	0.46675	517656, 528582, 522515	367	56	13095	1.91149	1	0.999907	99.9879
Annotation Cluster 32	Enrichment Score: 0.38747984918506634
Category	Term	Count	%	PValue	Genes	List Total	Pop Hits	Pop Total	Fold Enrichment	Bonferroni	Benjamini	FDR
GOTERM_BP_DIRECT	GO:0016567~protein ubiquitination	8	1.6129	0.205094	532791, 540134, 518991, 526835, 767973, 533936, 517357, 617304	398	167	13824	1.66389	1	0.999736	97.7742
INTERPRO	IPR017096:Kelch-like protein, gigaxonin	3	0.604839	0.280116	532791, 540134, 533936	462	38	16802	2.87116	1	0.999995	99.4576
UP_KEYWORDS	Kelch repeat	3	0.604839	0.43052	532791, 540134, 533936	491	53	17808	2.05295	1	0.912554	99.9375
PIR_SUPERFAMILY	PIRSF037037:kelch-like protein, gigaxonin type	3	0.604839	0.438503	532791, 540134, 533936	60	38	1521	2.00132	1	1	99.6792
SMART	SM00612:Kelch	3	0.604839	0.470461	532791, 540134, 533936	256	54	8740	1.8967	1	0.999451	99.9738
INTERPRO	IPR011705:BTB/Kelch-associated	3	0.604839	0.475259	532791, 540134, 533936	462	58	16802	1.8811	1	0.999997	99.9964
SMART	SM00875:SM00875	3	0.604839	0.49895	532791, 540134, 533936	256	57	8740	1.79688	1	0.999586	99.9872
INTERPRO	IPR006652:Kelch repeat type 1	3	0.604839	0.50185	532791, 540134, 533936	462	61	16802	1.78859	1	0.999998	99.9984
GOTERM_CC_DIRECT	GO:0031463~Cul3-RING ubiquitin ligase complex	3	0.604839	0.536216	532791, 540134, 533936	432	64	15461	1.67763	1	0.989922	99.9974
Annotation Cluster 33	Enrichment Score: 0.3857282834850856
Category	Term	Count	%	PValue	Genes	List Total	Pop Hits	Pop Total	Fold Enrichment	Bonferroni	Benjamini	FDR
KEGG_PATHWAY	bta03040:Spliceosome	6	1.20968	0.289412	787681, 615240, 767873, 507828, 507066, 513577	211	129	7550	1.66428	1	0.839553	98.788
UP_KEYWORDS	mRNA processing	6	1.20968	0.293053	511555, 787681, 534216, 615240, 507828, 507066	491	131	17808	1.66117	1	0.87517	98.9368
UP_KEYWORDS	mRNA splicing	5	1.00806	0.340017	787681, 534216, 615240, 507828, 507066	491	107	17808	1.69481	1	0.883636	99.568
SMART	SM00360:RRM	7	1.41129	0.464819	539785, 519028, 787681, 534216, 767873, 507828, 507066	256	187	8740	1.27799	1	0.99957	99.97
INTERPRO	IPR000504:RNA recognition motif domain	7	1.41129	0.467372	539785, 519028, 787681, 534216, 767873, 507828, 507066	462	199	16802	1.27928	1	0.999997	99.9955
INTERPRO	IPR012677:Nucleotide-binding, alpha-beta plait	8	1.6129	0.471008	539785, 508825, 519028, 787681, 534216, 767873, 507828, 507066	462	235	16802	1.23806	1	0.999997	99.9959
UP_KEYWORDS	Spliceosome	3	0.604839	0.520607	787681, 534216, 615240	491	63	17808	1.72709	1	0.937518	99.9934
GOTERM_MF_DIRECT	GO:0000166~nucleotide binding	9	1.81452	0.534226	539785, 508825, 519028, 787681, 505740, 534216, 767873, 507828, 507066	367	282	13095	1.13876	1	0.999957	99.9983
Annotation Cluster 34	Enrichment Score: 0.3750777564328698
Category	Term	Count	%	PValue	Genes	List Total	Pop Hits	Pop Total	Fold Enrichment	Bonferroni	Benjamini	FDR
INTERPRO	IPR008967:p53-like transcription factor, DNA-binding	4	0.806452	0.107614	508541, 535982, 282375, 616115	462	42	16802	3.46362	1	0.999886	83.5892
KEGG_PATHWAY	bta05221:Acute myeloid leukemia	4	0.806452	0.203668	404181, 508541, 282375, 616115	211	56	7550	2.55586	1	0.800965	94.7213
KEGG_PATHWAY	bta05161:Hepatitis B	6	1.20968	0.394401	508541, 282375, 493720, 505453, 616115, 513928	211	148	7550	1.45062	1	0.88449	99.8463
KEGG_PATHWAY	bta04917:Prolactin signaling pathway	3	0.604839	0.614812	508541, 282375, 616115	211	74	7550	1.45062	1	0.933126	99.9996
KEGG_PATHWAY	bta05203:Viral carcinogenesis	7	1.41129	0.638732	508541, 282375, 505453, 513397, 616115, 513928, 280677	211	234	7550	1.0704	1	0.938475	99.9998
KEGG_PATHWAY	bta05162:Measles	4	0.806452	0.752787	508541, 282375, 281489, 616115	211	140	7550	1.02234	1	0.964373	100
KEGG_PATHWAY	bta04630:Jak-STAT signaling pathway	3	0.604839	0.926811	508541, 282375, 505453	211	151	7550	0.7109	1	0.995205	100
Annotation Cluster 35	Enrichment Score: 0.36880126414493153
Category	Term	Count	%	PValue	Genes	List Total	Pop Hits	Pop Total	Fold Enrichment	Bonferroni	Benjamini	FDR
UP_SEQ_FEATURE	repeat:LRR 3	4	0.806452	0.298329	337889, 281168, 515066, 617304	188	64	6267	2.08344	1	1	99.4324
UP_SEQ_FEATURE	repeat:LRR 2	4	0.806452	0.331279	337889, 281168, 515066, 617304	188	68	6267	1.96089	1	1	99.7187
UP_SEQ_FEATURE	repeat:LRR 1	4	0.806452	0.331279	337889, 281168, 515066, 617304	188	68	6267	1.96089	1	1	99.7187
UP_SEQ_FEATURE	repeat:LRR 5	3	0.604839	0.452741	337889, 281168, 617304	188	51	6267	1.96089	1	1	99.9849
UP_SEQ_FEATURE	repeat:LRR 4	3	0.604839	0.5018	337889, 281168, 617304	188	56	6267	1.78581	1	1	99.9962
UP_KEYWORDS	Leucine-rich repeat	4	0.806452	0.82362	337889, 281168, 515066, 617304	491	161	17808	0.901089	1	0.988789	100
Annotation Cluster 36	Enrichment Score: 0.35889838893082204
Category	Term	Count	%	PValue	Genes	List Total	Pop Hits	Pop Total	Fold Enrichment	Bonferroni	Benjamini	FDR
INTERPRO	IPR017986:WD40-repeat-containing domain	13	2.62097	0.0744267	100138953, 522049, 517743, 511036, 540689, 530121, 509913, 100126041, 517357, 514870, 540661, 512685, 533611	462	273	16802	1.73181	1	0.999956	70.7016
INTERPRO	IPR015943:WD40/YVTN repeat-like-containing domain	11	2.21774	0.330123	100138953, 522049, 511036, 540689, 530121, 509913, 100126041, 514870, 517357, 540661, 512685	462	305	16802	1.31163	1	0.999993	99.827
INTERPRO	IPR001680:WD40 repeat	8	1.6129	0.512258	522049, 511036, 509913, 100126041, 514870, 517357, 540661, 512685	462	245	16802	1.18753	1	0.999997	99.9989
SMART	SM00320:WD40	8	1.6129	0.563783	522049, 511036, 509913, 100126041, 514870, 517357, 540661, 512685	256	242	8740	1.12862	1	0.999634	99.9979
INTERPRO	IPR020472:G-protein beta WD-40 repeat	3	0.604839	0.628229	511036, 100126041, 514870	462	77	16802	1.41693	1	1	100
INTERPRO	IPR019775:WD40 repeat, conserved site	4	0.806452	0.805491	511036, 100126041, 514870, 540661	462	156	16802	0.932512	1	1	100
UP_KEYWORDS	WD repeat	3	0.604839	0.856107	522049, 100126041, 514870	491	123	17808	0.884606	1	0.99236	100
Annotation Cluster 37	Enrichment Score: 0.3269484236891727
Category	Term	Count	%	PValue	Genes	List Total	Pop Hits	Pop Total	Fold Enrichment	Bonferroni	Benjamini	FDR
GOTERM_MF_DIRECT	GO:0050660~flavin adenine dinucleotide binding	4	0.806452	0.235264	531699, 526956, 510440, 618423	367	60	13095	2.37875	1	0.999295	97.8683
UP_KEYWORDS	FAD	3	0.604839	0.650468	531699, 510440, 618423	491	80	17808	1.36008	1	0.966096	99.9999
UP_KEYWORDS	Flavoprotein	3	0.604839	0.682927	531699, 510440, 618423	491	85	17808	1.28008	1	0.964288	100
Annotation Cluster 38	Enrichment Score: 0.3050730388722869
Category	Term	Count	%	PValue	Genes	List Total	Pop Hits	Pop Total	Fold Enrichment	Bonferroni	Benjamini	FDR
UP_SEQ_FEATURE	repeat:3	3	0.604839	0.411593	533360, 507066, 541250	188	47	6267	2.12777	1	1	99.9565
UP_SEQ_FEATURE	repeat:1	3	0.604839	0.538969	533360, 507066, 541250	188	60	6267	1.66676	1	1	99.9988
UP_SEQ_FEATURE	repeat:2	3	0.604839	0.54796	533360, 507066, 541250	188	61	6267	1.63943	1	1	99.9991
Annotation Cluster 39	Enrichment Score: 0.2884685569385787
Category	Term	Count	%	PValue	Genes	List Total	Pop Hits	Pop Total	Fold Enrichment	Bonferroni	Benjamini	FDR
INTERPRO	IPR000210:BTB/POZ-like	6	1.20968	0.485438	532791, 540134, 539020, 520456, 100124502, 539528	462	167	16802	1.30663	1	0.999997	99.9974
SMART	SM00225:BTB	6	1.20968	0.513493	532791, 540134, 539020, 520456, 100124502, 539528	256	162	8740	1.26447	1	0.999577	99.9913
INTERPRO	IPR011333:BTB/POZ fold	6	1.20968	0.546923	532791, 540134, 539020, 520456, 100124502, 539528	462	179	16802	1.21904	1	0.999998	99.9997
Annotation Cluster 40	Enrichment Score: 0.25678364797020276
Category	Term	Count	%	PValue	Genes	List Total	Pop Hits	Pop Total	Fold Enrichment	Bonferroni	Benjamini	FDR
UP_KEYWORDS	Transcription regulation	20	4.03226	0.394125	614893, 613265, 509072, 538615, 282375, 525389, 538853, 524491, 534607, 614679, 535982, 508541, 517743, 506967, 525346, 534475, 520580, 534170, 538465, 507984	491	638	17808	1.13695	1	0.901805	99.8592
UP_KEYWORDS	Transcription	21	4.23387	0.44936	614893, 512840, 613265, 509072, 538615, 282375, 525389, 538853, 524491, 534607, 614679, 535982, 508541, 517743, 506967, 525346, 534475, 520580, 534170, 538465, 507984	491	695	17808	1.09589	1	0.914675	99.9597
UP_KEYWORDS	Nucleus	56	11.2903	0.553702	512840, 513277, 444990, 618020, 525389, 532761, 523714, 508541, 538936, 530858, 540254, 505721, 767930, 511749, 509072, 514141, 613381, 613305, 538595, 538853, 524491, 507066, 523474, 614679, 522943, 615289, 517743, 787681, 615240, 525346, 286811, 540564, 539602, 510678, 511555, 614893, 282375, 509602, 512977, 534216, 537675, 534475, 520580, 538465, 507984, 510029, 538615, 613265, 618485, 507828,…	491	2019	17808	1.00597	1	0.943764	99.9974
GOTERM_BP_DIRECT	GO:0006351~transcription, DNA-templated	18	3.62903	0.567052	614893, 512840, 613265, 538615, 282375, 525389, 538853, 524491, 534607, 614679, 535982, 508541, 517743, 525346, 534475, 520580, 534170, 538465	398	603	13824	1.03683	1	0.999999	99.9999
UP_KEYWORDS	DNA-binding	17	3.42742	0.935306	512840, 538615, 613265, 509072, 282375, 524491, 523714, 535982, 508541, 506889, 512977, 506967, 534475, 534170, 505721, 507984, 510678	491	806	17808	0.764976	1	0.998237	100
Annotation Cluster 41	Enrichment Score: 0.22823555552656105
Category	Term	Count	%	PValue	Genes	List Total	Pop Hits	Pop Total	Fold Enrichment	Bonferroni	Benjamini	FDR
GOTERM_MF_DIRECT	GO:0005525~GTP binding	12	2.41935	0.371349	100139105, 538348, 613954, 513994, 538936, 506315, 532723, 524142, 506911, 613313, 513605, 616537	367	345	13095	1.24109	1	0.999769	99.8718
GOTERM_MF_DIRECT	GO:0003924~GTPase activity	5	1.00806	0.720992	506315, 532723, 524142, 613313, 513605	367	174	13095	1.02532	1	0.99999	100
UP_KEYWORDS	GTP-binding	6	1.20968	0.771935	538936, 506315, 532723, 524142, 506911, 613313	491	233	17808	0.933962	1	0.98135	100
Annotation Cluster 42	Enrichment Score: 0.1947968697592671
Category	Term	Count	%	PValue	Genes	List Total	Pop Hits	Pop Total	Fold Enrichment	Bonferroni	Benjamini	FDR
INTERPRO	IPR016186:C-type lectin-like	4	0.806452	0.540038	767907, 508076, 523701, 281368	462	103	16802	1.41235	1	0.999998	99.9996
INTERPRO	IPR016187:C-type lectin fold	4	0.806452	0.590899	767907, 508076, 523701, 281368	462	111	16802	1.31056	1	0.999999	99.9999
INTERPRO	IPR001304:C-type lectin	3	0.604839	0.711436	767907, 523701, 281368	462	90	16802	1.21227	1	1	100
SMART	SM00034:CLECT	3	0.604839	0.732385	767907, 523701, 281368	256	88	8740	1.16388	1	0.999974	100
Annotation Cluster 43	Enrichment Score: 0.18394733511177483
Category	Term	Count	%	PValue	Genes	List Total	Pop Hits	Pop Total	Fold Enrichment	Bonferroni	Benjamini	FDR
INTERPRO	IPR020683:Ankyrin repeat-containing domain	7	1.41129	0.519545	100297143, 788407, 513994, 516048, 535831, 616115, 100859923	462	210	16802	1.21227	1	0.999997	99.9991
INTERPRO	IPR002110:Ankyrin repeat	6	1.20968	0.653774	100297143, 788407, 513994, 516048, 535831, 616115	462	202	16802	1.08024	1	1	100
SMART	SM00248:ANK	6	1.20968	0.686389	100297143, 788407, 513994, 516048, 535831, 616115	256	197	8740	1.03982	1	0.999931	100
UP_KEYWORDS	ANK repeat	5	1.00806	0.788114	100297143, 788407, 516048, 535831, 616115	491	195	17808	0.92997	1	0.983369	100
Annotation Cluster 44	Enrichment Score: 0.18247543788748813
Category	Term	Count	%	PValue	Genes	List Total	Pop Hits	Pop Total	Fold Enrichment	Bonferroni	Benjamini	FDR
INTERPRO	IPR001254:Peptidase S1	4	0.806452	0.609012	530795, 515440, 522347, 529251	462	114	16802	1.27607	1	1	100
GOTERM_MF_DIRECT	GO:0004252~serine-type endopeptidase activity	5	1.00806	0.618038	530795, 515440, 522347, 529251, 533203	367	152	13095	1.17372	1	0.999962	99.9999
SMART	SM00020:Tryp_SPc	4	0.806452	0.639518	530795, 515440, 522347, 529251	256	112	8740	1.21931	1	0.999881	99.9998
INTERPRO	IPR009003:Trypsin-like cysteine/serine peptidase domain	4	0.806452	0.649156	530795, 515440, 522347, 529251	462	121	16802	1.20225	1	1	100
INTERPRO	IPR001314:Peptidase S1A, chymotrypsin-type	3	0.604839	0.783033	530795, 515440, 522347	462	104	16802	1.04908	1	1	100
Annotation Cluster 45	Enrichment Score: 0.18225408143047686
Category	Term	Count	%	PValue	Genes	List Total	Pop Hits	Pop Total	Fold Enrichment	Bonferroni	Benjamini	FDR
KEGG_PATHWAY	bta05168:Herpes simplex infection	6	1.20968	0.613644	493720, 507828, 505453, 616115, 507066, 280677	211	190	7550	1.12996	1	0.93468	99.9995
KEGG_PATHWAY	bta05142:Chagas disease (American trypanosomiasis)	4	0.806452	0.619328	515669, 493720, 616115, 280677	211	114	7550	1.25551	1	0.933232	99.9996
KEGG_PATHWAY	bta05152:Tuberculosis	5	1.00806	0.747138	493720, 505453, 616115, 790867, 280677	211	181	7550	0.988453	1	0.963613	100
Annotation Cluster 46	Enrichment Score: 0.11530230596398591
Category	Term	Count	%	PValue	Genes	List Total	Pop Hits	Pop Total	Fold Enrichment	Bonferroni	Benjamini	FDR
GOTERM_BP_DIRECT	GO:0051301~cell division	5	1.00806	0.628923	540134, 513277, 512977, 515301, 541250	398	150	13824	1.15779	1	1	100
UP_KEYWORDS	Cell cycle	6	1.20968	0.765475	404181, 538615, 513277, 512977, 522943, 541250	491	231	17808	0.942048	1	0.980686	100
UP_KEYWORDS	Mitosis	3	0.604839	0.779791	513277, 512977, 541250	491	103	17808	1.05637	1	0.982317	100
UP_KEYWORDS	Cell division	3	0.604839	0.921051	513277, 512977, 541250	491	150	17808	0.725377	1	0.997615	100
Annotation Cluster 47	Enrichment Score: 0.1097585553608439
Category	Term	Count	%	PValue	Genes	List Total	Pop Hits	Pop Total	Fold Enrichment	Bonferroni	Benjamini	FDR
UP_KEYWORDS	Transit peptide	9	1.81452	0.700522	515563, 510440, 287012, 540329, 514472, 532842, 282446, 506358, 505809	491	333	17808	0.980239	1	0.967375	100
UP_SEQ_FEATURE	transit peptide:Mitochondrion	9	1.81452	0.774078	515563, 510440, 287012, 540329, 514472, 532842, 282446, 506358, 505809	188	329	6267	0.911903	1	1	100
UP_KEYWORDS	Mitochondrion	15	3.02419	0.864009	515563, 613948, 287012, 540329, 514472, 506358, 281342, 404181, 510440, 532842, 282446, 505809, 511554, 282710, 529235	491	653	17808	0.833128	1	0.993051	100
Annotation Cluster 48	Enrichment Score: 0.10639015977026747
Category	Term	Count	%	PValue	Genes	List Total	Pop Hits	Pop Total	Fold Enrichment	Bonferroni	Benjamini	FDR
INTERPRO	IPR013032:EGF-like, conserved site	5	1.00806	0.702744	523720, 522347, 523701, 540664, 523793	462	173	16802	1.0511	1	1	100
INTERPRO	IPR001881:EGF-like calcium-binding	3	0.604839	0.812624	522347, 523701, 523793	462	111	16802	0.982918	1	1	100
SMART	SM00179:EGF_CA	3	0.604839	0.839736	522347, 523701, 523793	256	111	8740	0.92272	1	0.999999	100
Annotation Cluster 49	Enrichment Score: 0.08087318735492678
Category	Term	Count	%	PValue	Genes	List Total	Pop Hits	Pop Total	Fold Enrichment	Bonferroni	Benjamini	FDR
INTERPRO	IPR001849:Pleckstrin homology domain	6	1.20968	0.776259	506315, 515556, 407210, 510748, 540393, 537578	462	235	16802	0.928544	1	1	100
INTERPRO	IPR011993:Pleckstrin homology-like domain	9	1.81452	0.826833	506315, 515669, 515556, 527349, 407210, 510748, 281879, 540393, 537578	462	382	16802	0.856837	1	1	100
SMART	SM00233:PH	5	1.00806	0.891161	515556, 407210, 510748, 540393, 537578	256	221	8740	0.772412	1	1	100
Annotation Cluster 50	Enrichment Score: 0.07136701056838972
Category	Term	Count	%	PValue	Genes	List Total	Pop Hits	Pop Total	Fold Enrichment	Bonferroni	Benjamini	FDR
INTERPRO	IPR013106:Immunoglobulin V-set	5	1.00806	0.55478	521837, 507026, 523701, 525599, 789755	462	143	16802	1.27161	1	0.999998	99.9997
INTERPRO	IPR007110:Immunoglobulin-like domain	9	1.81452	0.913518	521837, 281614, 790068, 523701, 281489, 538875, 504335, 525599, 789755	462	435	16802	0.752441	1	1	100
INTERPRO	IPR013783:Immunoglobulin-like fold	12	2.41935	0.942074	521837, 514810, 281614, 790068, 523701, 616115, 522188, 538875, 504335, 540664, 525599, 789755	462	599	16802	0.728574	1	1	100
INTERPRO	IPR003599:Immunoglobulin subtype	6	1.20968	0.951552	521837, 281614, 523701, 538875, 525599, 789755	462	331	16802	0.659238	1	1	100
SMART	SM00409:IG	6	1.20968	0.967853	521837, 281614, 523701, 538875, 525599, 789755	256	331	8740	0.618863	1	1	100
Annotation Cluster 51	Enrichment Score: 0.06839101824992729
Category	Term	Count	%	PValue	Genes	List Total	Pop Hits	Pop Total	Fold Enrichment	Bonferroni	Benjamini	FDR
INTERPRO	IPR017907:Zinc finger, RING-type, conserved site	4	0.806452	0.75578	538657, 615866, 767973, 614210	462	143	16802	1.01729	1	1	100
INTERPRO	IPR001841:Zinc finger, RING-type	6	1.20968	0.827496	538657, 521797, 615866, 282034, 767973, 614210	462	253	16802	0.862481	1	1	100
SMART	SM00184:RING	5	1.00806	0.866755	538657, 615866, 282034, 767973, 614210	256	210	8740	0.812872	1	1	100
INTERPRO	IPR013083:Zinc finger, RING/FYVE/PHD-type	6	1.20968	0.982603	538657, 615866, 282034, 100141289, 767973, 614210	462	387	16802	0.563844	1	1	100
Annotation Cluster 52	Enrichment Score: 0.045559510389246494
Category	Term	Count	%	PValue	Genes	List Total	Pop Hits	Pop Total	Fold Enrichment	Bonferroni	Benjamini	FDR
INTERPRO	IPR013087:Zinc finger C2H2-type/integrase DNA-binding domain	10	2.01613	0.796441	537773, 613265, 783152, 539020, 538853, 532761, 515997, 534170, 618141, 100144618	462	410	16802	0.887024	1	1	100
INTERPRO	IPR007087:Zinc finger, C2H2	11	2.21774	0.882247	537773, 613265, 534216, 783152, 539020, 538853, 532761, 515997, 534170, 618141, 100144618	462	499	16802	0.801699	1	1	100
INTERPRO	IPR015880:Zinc finger, C2H2-like	10	2.01613	0.900534	537773, 613265, 783152, 539020, 538853, 532761, 515997, 534170, 618141, 100144618	462	469	16802	0.775436	1	1	100
SMART	SM00355:ZnF_C2H2	10	2.01613	0.935761	537773, 613265, 783152, 539020, 538853, 532761, 515997, 534170, 618141, 100144618	256	469	8740	0.727945	1	1	100
GOTERM_MF_DIRECT	GO:0003676~nucleic acid binding	5	1.00806	0.999525	539785, 537773, 783152, 532761, 618141	367	488	13095	0.365586	1	1	100
Annotation Cluster 53	Enrichment Score: 0.0025488342961041024
Category	Term	Count	%	PValue	Genes	List Total	Pop Hits	Pop Total	Fold Enrichment	Bonferroni	Benjamini	FDR
KEGG_PATHWAY	bta04080:Neuroactive ligand-receptor interaction	5	1.00806	0.965399	281299, 767936, 512581, 537043, 517533	211	292	7550	0.612705	1	0.998552	100
UP_KEYWORDS	Receptor	13	2.62097	1	617215, 537922, 282882, 281368, 523793, 281879, 507830, 338068, 404191, 767936, 281299, 512581, 537043	491	1461	17808	0.322721	1	1	100
INTERPRO	IPR000276:G protein-coupled receptor, rhodopsin-like	6	1.20968	1	540647, 281299, 767936, 512581, 537043, 517533	462	1051	16802	0.207619	1	1	100
INTERPRO	IPR017452:GPCR, rhodopsin-like, 7TM	6	1.20968	1	540647, 281299, 767936, 512581, 537043, 517533	462	1067	16802	0.204506	1	1	100
UP_KEYWORDS	Transducer	6	1.20968	1	515669, 281299, 767936, 512581, 537043, 523793	491	1099	17808	0.19801	1	1	100
UP_KEYWORDS	G-protein coupled receptor	5	1.00806	1	281299, 767936, 512581, 537043, 523793	491	1053	17808	0.172217	1	1	100
Annotation Cluster 54	Enrichment Score: 3.6096313274760647E-5
Category	Term	Count	%	PValue	Genes	List Total	Pop Hits	Pop Total	Fold Enrichment	Bonferroni	Benjamini	FDR
UP_KEYWORDS	Membrane	123	24.7984	0.999675	444990, 507455, 540689, 538745, 528379, 617307, 517059, 520625, 512999, 281661, 526045, 538936, 767936, 506911, 282710, 504335, 533611, 614538, 504519, 537922, 100124502, 282882, 281342, 508465, 616432, 281299, 540568, 522188, 613313, 338085, 789234, 518991, 767899, 507837, 282648, 505069, 539528, 616139, 507026, 532120, 514485, 509263, 615464, 512029, 506103, 538104, 513967, 280936, 100139910, 6…	491	5650	17808	0.789569	1	1	100
UP_KEYWORDS	Transmembrane helix	95	19.1532	0.999996	613948, 540647, 507455, 540689, 538745, 506812, 516807, 534591, 617307, 614775, 282233, 517059, 520625, 512999, 526045, 404191, 767936, 516747, 504335, 100139857, 512289, 614538, 511749, 521797, 509031, 613932, 514514, 537922, 281918, 282882, 508465, 281614, 616432, 784716, 537067, 281299, 515687, 540568, 613313, 522515, 522188, 517533, 506692, 789234, 518991, 533048, 767899, 788087, 517332, 2826…	491	4935	17808	0.698184	1	1	100
UP_KEYWORDS	Transmembrane	95	19.1532	0.999997	613948, 540647, 507455, 540689, 538745, 506812, 516807, 534591, 617307, 614775, 282233, 517059, 520625, 512999, 526045, 404191, 767936, 516747, 504335, 100139857, 512289, 614538, 511749, 521797, 509031, 613932, 514514, 537922, 281918, 282882, 508465, 281614, 616432, 784716, 537067, 281299, 515687, 540568, 613313, 522515, 522188, 517533, 506692, 789234, 518991, 533048, 767899, 788087, 517332, 2826…	491	4953	17808	0.695647	1	1	100
GOTERM_CC_DIRECT	GO:0016021~integral component of membrane	77	15.5242	0.999999	613948, 540647, 507455, 540689, 538745, 506812, 516807, 534591, 614775, 282233, 517059, 520625, 512999, 526045, 404191, 504335, 512289, 614538, 511749, 521797, 613932, 281918, 281614, 616432, 784716, 281299, 515687, 613313, 522188, 522515, 517533, 506692, 789234, 518991, 533048, 767899, 517332, 788087, 539528, 523793, 281879, 783019, 514485, 523460, 509263, 505740, 615464, 788015, 506103, 281489,…	432	4185	15461	0.65849	1	1	100
